# Supplementary material for: Deep learning-based phenotype prediction analysis of genotype-environment interactions and mining of environmentally stable germplasm and elite loci in cotton
Source: Research Square preprint supplement (doi:10.21203/rs.3.rs-7483914/v1), 2025-09-11
Supplement: Supplementary file 1 [file 096f602ad0510f8e0b1ae459.xlsx]

## Sheet: Sheet1
Supplementary Table 14. The environmental adaptability parameters of 13 traits of 419 upland cotton
Samples	BPP	BW	FD	FL	FS	FWPB	GP	LP	LU	M	SBno	SBnode	SI
B001	8.45	37.78	0.622	5.43	10.77	1.116	55.06	300.8	0.6642	1.273	18.78	44.64	2.055
B002	12.62	19.89	0.557	5.25	6.936	2.662	57.97	211.1	0.2669	1.109	12.1	89.93	1.765
B003	4.88	12.71	0.85	7.52	4.719	0.849	33.82	87.3	0.7227	1.002	22.09	18.46	2.382
B004	9.52	61.89	0.486	11.19	7.942	2.128	137.16	301.8	0.3951	2.927	54.91	23.66	11.109
B005	8.19	33.17	0.171	17.54	6.659	0.466	109.52	218.8	0.5013	1.119	25.27	17.03	3.492
B006	3.02	29.68	1.398	4.98	5.176	0.895	17.57	105	0.9825	0.794	23.44	28.44	4.191
B007	6.38	13.62	1.019	5.01	2.696	1.017	201.41	366.8	0.7218	3.527	36.13	36.74	8.294
B008	5.54	10.94	0.958	5.52	6.217	0.971	36.76	132.5	0.3944	2.387	23.26	17.89	2.297
B009	23.37	28.87	1.492	13.2	7.418	12.913	73.41	207.1	0.3601	0.774	46.21	11.85	1.458
B010	8.77	23.97	0.444	4.59	18.272	2.684	10.59	246.1	0.4044	1.379	32.62	101.51	3.106
B011	11.63	31.31	1.707	6.2	24.333	0.581	87.07	196.3	0.7811	2.412	34.01	41.13	1.965
B012	4.37	49.21	0.979	12.6	9.814	1.663	32.41	187.2	0.8002	1.28	23.55	28	0.719
B013	1.88	9.19	0.482	7.71	6.348	1.783	63.67	222.3	0.6096	1.34	31.45	100.39	1.6
B014	20.49	11.94	0.326	6.75	5.721	3.888	60.84	168	0.3572	2.022	16.71	27.54	3.466
B015	12.97	8.71	0.927	22.12	8.846	0.579	54.58	287.7	0.4505	0.532	15.21	44.44	3.394
B016	8.8	42.33	0.385	5.22	15.432	1.672	56.58	142.8	1.6853	1.999	79.99	25.97	0.295
B017	17.55	43.66	0.483	10.1	0.65	0.758	59.8	155.7	1.1902	1.658	25.64	15.55	1.229
B018	10.73	28.47	0.704	18.11	7.673	1.595	39.91	61.8	0.4924	0.143	38.13	11.22	3.946
B019	8.13	14.73	0.741	6.37	23.427	4.894	78.24	410.7	0.3819	1.193	30.59	78.58	3.08
B020	2.78	7.34	0.552	3.89	20.918	1.263	59.32	310	0.2746	0.561	24.88	72.29	1.772
B021	6.91	20.8	0.642	3.53	16.333	0.864	81.21	442.8	0.5034	1.917	33.88	48.37	0.665
B022	3.79	29.94	0.71	4.18	7.655	0.681	49.47	283.6	0.727	1.163	14.07	72.26	0.489
B023	6.34	15.46	0.489	13.86	20.542	1.009	44.65	236.1	1.2845	4.722	27.86	34.85	0.771
B024	4.92	26.62	0.312	12.63	16.389	0.144	14.03	133.3	0.4024	1.639	37.74	36.25	2.637
B025	7.25	17.15	0.436	8.96	7.588	2.005	56.47	371.4	1.572	1.919	37.88	46.82	3.904
B026	4.26	21.77	0.419	8.7	8.16	0.795	46.88	208.3	0.613	1.234	7.23	56.16	2.39
B027	2.33	9.61	0.827	8.06	3.968	0.363	92.18	189.8	0.3619	2.274	13.27	54.99	1.076
B028	9.36	13.48	0.686	9.12	25.988	0.308	84.79	496.7	0.2053	1.673	16.75	50.35	1.342
B029	15.38	9.71	0.288	11.28	16.116	0.824	54.67	82.1	0.6947	0.592	14.63	46.6	2.107
B030	5.07	28.67	1.167	7.24	13.921	10.926	132.79	370.9	0.5322	1.15	40.63	33.41	0.698
B031	4.74	28.13	0.933	7.55	20.425	0.6	82.51	294.7	0.3537	2.3	47.06	41.69	2.33
B032	6.42	20.54	0.623	4.5	9.755	11.516	122.09	693.5	0.7176	2.668	33.14	86.59	2.014
B033	8.72	15.87	0.829	7.11	3.2	2.396	33.74	108.1	0.7056	3.207	20.22	60.92	1.578
B034	6.77	18.66	0.253	6.83	11.737	0.837	96.28	321.1	0.3492	0.725	8.02	35.3	1.106
B035	11.48	44.38	0.438	14.17	6.116	0.94	42.57	116.6	0.8323	1.932	31.62	10.1	3.286
B036	10.09	13.54	0.533	6.31	13.915	0.711	42.79	212.2	0.3495	1.286	11.97	47.57	2.432
B037	14.39	20.95	1.848	12.71	5.563	0.738	26.47	285.8	0.506	1.26	25.03	25.15	2.998
B038	7.31	18.16	0.464	9.8	11.448	4.44	10.53	61.7	0.594	1.052	13.1	150.57	1.488
B039	16.65	27.4	0.705	30.62	13.113	0.537	91.79	754.2	1.0059	1.625	73.93	15.44	2.076
B040	11.57	20.19	0.568	11.19	17.282	1.619	92.43	344.1	0.3855	2.079	24.62	70.42	1.095
B041	4.36	43.56	1.811	3.52	6.391	0.858	80.52	327.2	0.4523	1.537	14.11	130.52	3.133
B042	5.86	13.44	0.922	6.56	1.885	1.676	48.49	126	0.1014	2.03	14.65	31.59	3.466
B043	8.58	34.54	0.64	17.33	1.339	1.427	20.41	81.9	1.9633	1.544	30.07	14.07	8.34
B044	5.34	16.38	0.451	11.51	5.232	1.109	16.66	72.2	0.3881	0.912	48.47	105.11	2.143
B045	11.86	18.2	0.536	22.44	9.992	1.358	28.03	286.9	0.1262	1.703	35.31	38.01	2.227
B046	4.4	34.67	0.355	8.79	10.859	8.396	95.59	347.4	0.3409	1.335	14.04	68.86	0.626
B047	19.02	15.73	2.12	30.65	14.518	1.474	145.61	647.7	0.258	1.876	52.94	39.06	1.764
B048	35.83	117.78	1.658	11.18	9.119	2.162	65.68	274.5	1.1234	3.665	23.51	53.55	1.503
B049	5.21	17.38	0.347	15.25	10.303	0.206	76.75	245.9	0.231	1.169	49.51	11.96	2.691
B050	7.97	29.35	0.309	11.41	4.493	1.436	21.39	134.1	0.3512	2.407	17.08	20.18	1.381
B051	10.77	20.58	0.935	22.48	14.991	3.047	28.43	756.1	1.0363	2.555	17.62	20.44	4.257
B052	8.94	20.7	0.791	7.87	11.039	1.283	66.8	1119	1.3278	3.244	17.85	86.47	2.84
B053	5.24	4.77	1.065	16.61	8.97	1.214	75.3	295.4	0.5906	2.608	12.39	102.18	4.61
B054	4.7	38.09	0.818	9.22	6.366	0.605	74.31	196.7	0.4163	1.642	18.01	18.24	0.958
B055	8.79	25.1	1.129	7.92	6.242	1.003	37.57	80.9	1.0775	2.189	32.6	64.93	3.19
B056	1.62	12.17	0.628	9.08	5.44	1	171.91	1180.1	0.5456	2.778	29.82	46.41	1.352
B057	2.12	21.96	0.726	7.56	34.053	0.392	63.17	262.4	1.0981	2.677	304.52	92.42	1.612
B058	8.36	19.85	4.272	15.99	2.147	1.041	24.07	67.2	0.9732	0.875	158.19	60.18	3.689
B059	32.95	31.1	2.942	22.01	6.644	1.004	30.2	256.3	1.0892	4.907	230.9	39.27	4.843
B060	1.69	17.26	0.433	11.06	8.944	0.86	37.86	98.4	0.5507	1.162	7.59	49.43	0.988
B061	12.25	54.43	0.706	6.78	5.103	2.141	59.02	660.9	0.4432	1.013	21	63.75	1.062
B062	10.52	33.32	4.129	10.42	12.246	1.374	51.1	257.3	0.806	1.233	96.87	33.44	2.993
B063	3.81	47.97	1.246	26.71	21.715	0.24	57.44	287.9	1.197	2.571	135.13	45.58	7.864
B064	13.47	76.85	1.325	17.52	26.176	3.151	75.4	1291.6	0.4023	1.695	30.61	27.52	3.119
B065	2.87	12.86	0.749	7.92	14.677	0.198	19.65	131.1	0.6267	3.119	5.18	93.58	1.306
B066	6.04	30.48	0.811	5.34	0.69	1.94	50.54	166	1.0231	1.44	25.1	82.24	0.836
B067	7.07	8.54	0.681	3.82	6.127	1.376	34.23	133.2	0.2382	1.643	11.46	17.92	4.289
B068	12.92	22.2	0.999	7.78	15.063	2.78	63.4	189.5	2.2456	6.976	32.81	46.08	0.905
B069	16.25	70.44	1.207	5.99	4.968	1.004	111.65	208	1.0577	1.928	15.48	24.31	2.557
B070	3.3	13.66	1.825	11.95	4.853	1.272	12.93	632.9	0.5749	1.677	53.01	23.67	1.668
B071	5.05	19.38	0.839	4.16	6.69	2.419	34.11	204.1	0.4476	1.979	68.46	16.77	3.795
B073	7.14	15.06	1.115	10.95	8.684	4.321	47.78	385.7	0.1831	0.583	7.13	34.79	1.434
B074	12.84	32.7	0.315	11.63	1.597	1.323	26.93	171.3	0.3306	0.627	15.48	77.95	3.218
B075	9.52	11.35	0.821	25.72	11.964	0.855	34.57	453.3	0.1789	2.72	19.63	81.27	2.923
B076	3.8	16.69	0.821	6.67	10.267	1.565	17.48	135.3	0.491	3.478	35.32	73.18	3.437
B077	5.97	4.6	0.682	10.33	3.431	2.362	41.6	462.3	0.6396	1.282	14.24	42.55	6.807
B078	11.35	13	1.233	9.97	0.796	1.414	59.89	110.5	0.551	0.975	16.21	35.83	1.067
B079	5.86	19.32	0.781	16.86	10.647	1.06	51.46	382	0.9944	1.764	64.73	64.54	2.777
B080	10.49	26.32	0.436	5.91	5.197	0.34	16.06	86.5	0.1309	1.128	38.22	51.23	4.102
B081	4.27	12.92	0.521	9.61	8.193	1.481	76.19	1394.8	0.302	2.007	22.48	19.4	1.627
B082	5.42	21.98	0.726	11.38	18.197	0.806	30.26	634.2	0.5039	0.453	14.45	92.35	1.791
B083	7.44	15.52	1.04	11.68	10.551	0.385	34.31	74.2	0.3084	0.905	94.2	97.8	1.737
D001	24.71	12.25	2.283	9.51	9.689	2.552	90.96	275.8	1.0279	3.078	44.33	163.88	3.735
D002	9.32	29.45	0.603	5.74	14.155	0.329	45.79	130.6	0.3163	0.564	12.54	18.63	1.428
D003	6.03	8.81	0.356	3.19	10.56	0.721	53.04	173.6	0.4789	1.037	7.51	106.94	1.009
D004	13.29	16.76	1.447	10.33	12.196	2.168	63.13	154.7	0.3598	1.055	44.12	4.75	7.681
D005	9.71	18.78	0.64	6.31	12.372	0.817	30.32	270.5	0.6028	1.991	39.27	44.54	3.232
D006	9.62	35.3	2.606	15.07	4.213	1.406	37.39	242	0.3232	1.203	24.05	40.41	2.905
D007	10.21	20.6	0.416	10.16	11.2	0.733	14.28	338.1	0.4221	0.42	24.3	14.49	0.866
D008	10.1	47.9	1.401	12.53	9.802	0.518	11.87	237	0.1675	1.033	11.17	5.82	2.193
D009	12	27	1.284	9.17	6.763	1.135	109.79	331.6	0.2454	1	17.41	59.93	5.82
D010	4.43	7.09	0.526	6.62	6.361	0.439	31.06	235.7	0.4519	1.818	77.6	106	3.395
D011	9	15.23	1.765	2.92	5.015	1.746	29.91	120.9	2.2805	5.647	30.52	39.23	0.948
D012	3.6	21.86	1.717	5.74	14.387	1.498	35.16	173	0.4301	0.502	35.25	3.11	2.404
D013	5.71	17.57	0.655	5.73	3.999	0.811	27.07	181.3	0.2667	0.856	49.05	37.18	2.103
D014	16.6	32.73	0.832	31.34	7.81	0.884	31.74	187.3	1.1943	3.904	35.74	31.28	3.107
D015	13.84	30.23	0.682	6.82	6.616	1.034	20.2	83.2	1.1431	3.987	109.7	100.59	3.704
D016	3.3	6.04	0.329	7.78	17.115	1.128	19.33	161.1	0.9087	1.795	25.12	96.63	1.503
D017	3.29	13.92	0.412	8.04	4.207	0.955	15.02	338	0.5034	1.985	16.51	70.56	6.141
D018	7.82	21.65	0.533	1.67	0.907	0.598	13.22	74.9	0.4352	0.609	45.62	35.47	1.691
D019	5.99	22.01	0.832	5.94	4.507	0.471	4.46	100.6	0.2017	0.945	29.32	28.04	0.613
D020	5.69	13	0.484	12.13	51.074	0.917	6.31	266.5	1.1348	0.696	15.04	65.85	0.892
D021	2.63	35.41	0.281	9.48	10.503	3.058	27.21	105.7	0.6131	0.922	16.08	6.95	1.447
D022	6.74	11.78	0.696	10.67	13.701	2.079	84.18	419.4	0.6928	2.358	37	35.76	1.738
D023	9.81	24.99	0.513	10.92	11.375	2.319	63.52	768.8	0.7191	1.985	104.21	22.61	3.907
D024	6.93	19.56	0.635	6.27	3.432	0.765	28.28	430.9	0.4098	1.025	141.87	34.61	0.53
D025	14.52	48.58	0.717	14.11	2.348	3.229	15.61	141.8	0.5432	0.315	52.13	56.3	3.208
D026	7.58	19.19	0.669	15.79	1.936	0.674	35.32	279.6	0.2907	0.932	9.89	15.85	7.691
D027	5.71	30.34	0.882	13.67	11.439	4.607	111.77	589.6	0.6212	2.277	14.88	109.41	2.701
D028	10.08	35.74	0.856	21.96	5.698	1.563	141.42	729.8	0.9337	1.128	34.38	85.22	0.679
D029	3.33	36.06	1.204	2.82	25.964	2.001	108.91	115.1	2.1554	6.228	41.02	27.59	9.721
D030	5.11	8.67	0.91	13.36	1.152	0.611	51.21	151.9	0.5024	1.3	17.38	17.46	2.603
D031	3.73	19.87	0.702	4.43	6.892	0.654	99.53	361.7	0.8343	2.108	13.1	69.77	6.353
D032	2.7	21.22	0.508	6.2	11.302	1.988	40.48	166.2	0.681	1.324	12.52	61.22	1.941
D033	9.06	25.89	0.598	7.74	20.208	1.482	19.64	302.1	0.371	1.705	23.71	4.09	3.194
D034	5.94	15.73	0.773	12.37	2.965	0.71	40.18	237.9	0.2103	2.047	68.29	48.34	2.451
D035	8.66	15.49	1.218	7.26	4.576	1.098	59.58	853.2	0.4034	2.346	23.34	20.72	3.367
D036	2.49	39.06	1.114	5.58	16.482	3.661	98.04	1468.8	0.5526	4.197	16.79	69.21	5.676
D037	2.76	17.49	0.318	13.43	14.361	1.319	43.83	138.2	0.1377	0.651	19.15	25.45	3.174
D038	7.96	13.12	1.117	13.57	4.774	1.663	30.57	78.4	0.2187	2.365	19.84	30.45	1.409
D039	3.18	9.33	1.532	11.11	4.535	1.051	27.37	233.4	0.7717	4.6	13.38	55.74	2.637
D040	2.69	17.45	0.531	22.69	6.038	1.422	41.77	342.5	0.3603	1.203	32.41	55.79	3.081
D041	8.91	12.23	0.446	15.98	21.741	1.144	42.26	166.2	0.3046	5.201	43.31	50.98	1.16
D042	10.57	14.53	0.367	18.06	11.25	1.623	47.38	216.3	0.6481	2.325	18.8	6.8	5.523
D043	10.18	28.72	0.786	5.22	4.11	1.232	10.57	202.8	0.675	0.925	36.97	39.65	1.869
D044	5.9	12.98	0.614	10.07	6.118	0.286	41.71	355.5	0.2441	1.585	31.05	13.32	4.629
D045	4.11	33.7	0.85	3.62	12.688	1.975	101.38	392.7	0.743	2.659	22.56	36.69	2.015
D046	6.38	35.26	1.815	10.5	5.982	0.741	24.41	58.9	0.296	0.348	30.71	78.49	0.948
D047	6.29	12.59	1.023	4.88	4.634	1.147	50.54	362.5	0.25	2.335	12.59	55.91	3.333
D048	9.29	21.02	0.727	17.78	9.18	5.53	61.34	295	0.4828	1.833	32.68	12.91	1.557
D049	5.67	19.76	0.616	19.85	7.635	3.268	68.64	133.5	0.5772	2.593	40.76	72.57	1.601
D050	7.75	23.34	0.495	15.31	9.866	1.416	21.96	189.4	0.2771	0.887	29.06	13.14	2.018
D051	4.44	29.39	0.439	8.83	7.422	1.055	24.33	149.2	1.0879	1.433	82.12	73.95	1.817
D052	9.85	20.43	0.859	7.74	3.619	0.638	6.71	189.6	0.7006	2.641	78.69	31.66	1.203
D053	5.69	13.02	0.313	11.62	5.347	0.484	35.09	193	0.5343	1.893	17.37	7.18	3.018
D054	17.49	100.3	1.298	8.82	4.499	0.162	56.94	68.9	0.706	2.19	39.54	79.08	4.96
D055	5.8	99.35	0.817	6.81	3.842	5.17	42	401.9	0.6878	3.865	59.79	1.39	2.532
D056	5.07	114.62	0.498	5.15	2.859	1.354	22.87	273.1	0.9684	2.413	21.73	104.15	10.279
D057	7.72	42.25	0.567	4.14	3.288	2.606	31.98	169	0.4208	1.54	39.2	23.57	1.812
D058	2.75	8.77	1.285	7.7	5.038	0.525	43.86	74.2	0.5364	1.727	23.95	57.81	3.684
D059	7.26	73.18	2.086	11.76	7.355	0.454	96	419.2	0.8886	4.629	17.65	31.81	7.106
D060	7.17	18.74	0.743	5.31	1.488	0.483	46.76	504.7	0.4786	0.725	14.64	21.28	8.495
D061	15.49	31.35	1.096	14.16	24.405	0.874	54.08	806.2	0.1494	1.248	6.54	71.97	2.507
D062	5.02	32.52	0.818	15.6	20.805	1.29	67.45	722.8	0.1901	0.964	46.56	45.44	5.347
D063	6.53	12.06	2.632	11.06	14.243	1.111	37.52	267.8	0.7396	3.033	9.5	49.34	2.155
D064	3.84	4.48	1.083	6.7	13.976	0.449	122.56	437.5	0.6102	2.966	38	24.04	0.891
D065	16.97	52.66	0.58	13.56	5.641	2.134	41.73	485.4	0.3907	2.066	24.02	62.82	5.466
D066	14.8	133.26	2.116	8.18	11.262	3.594	57.07	697.5	0.3784	1.657	21.71	42.93	4.309
D067	6.13	21.34	1.77	5.19	6.448	0.64	57.59	292.1	0.5414	1.513	45.25	93.41	1.97
D068	3.53	23.21	0.91	7.69	21.614	0.982	85.27	664.6	0.7863	3.501	26.11	102.42	3.119
D069	5.63	19.44	1.012	8.62	9.264	1.85	19.96	228.9	0.4622	1.106	20.49	159.35	1.058
D070	3.89	6.81	0.324	7.84	9.155	0.802	39.34	141.7	1.0032	0.929	52.3	23.54	0.739
D071	6.35	20.43	1.017	6.84	6.196	1.218	23.69	70.3	0.2861	1.028	22.12	30.59	1.2
D072	16.92	27.32	1.478	8.07	9.286	1.171	27.36	138.5	0.7538	2.353	16.67	12.4	2.866
D073	10.74	17.99	0.635	11.01	7.73	2.88	14.19	102.9	0.2052	0.82	5.14	18.08	2.255
D074	30.39	36.85	2.401	22.76	5.677	0.49	60.9	407	0.4774	4.615	207.08	32.49	5.304
D075	3.77	13.96	1.181	22.12	12.024	0.915	79.66	1110.6	0.191	1.165	113.07	61.98	2.084
D076	3.15	11.74	0.208	5.19	12.577	3.583	66.34	256.8	0.4196	0.719	33.61	95.99	1.974
D077	5.91	5.16	0.79	4.49	9.599	0.81	29.39	263.5	0.2909	1.934	18.96	29.2	2.838
D078	7.54	46.83	1.135	4.7	10.437	0.991	15.63	551.2	0.558	1.422	27.2	38.06	1.458
D079	3.08	26.68	0.654	8.09	5.91	3.812	48.51	512.2	0.3696	3.046	16.98	21	3.234
D080	17.35	9.85	0.94	20.05	3.65	3.599	65.02	504.1	0.5106	1.367	31.99	17.03	2.817
D081	4.59	23.66	2.351	7.1	3.701	1.862	18.12	104.7	0.4019	2.326	15.98	38.16	3.764
D082	5.61	13.83	0.975	9.66	9.139	1.01	52.85	698.4	0.2083	1.203	9.73	33.22	1.376
D083	9.55	30.04	0.422	12.32	4.943	1.763	66.27	209.3	0.2119	2.497	80.05	19.57	3.039
D084	7.93	24.53	0.682	8.85	10.192	1.531	98.67	233.7	0.2544	1.353	17.23	23.43	1.902
D085	10.58	36.45	1.602	6.28	10.45	1.426	97.22	467.2	0.7887	2.42	57.85	12.18	2.705
D086	3.36	25.09	0.287	3.57	2.594	2.733	20.77	186.9	0.4902	7.084	31.37	122.61	4.237
D087	11.32	25.46	0.856	8.07	0.999	0.245	37.37	115	0.4941	2.649	12.28	56.46	1.194
D088	4.87	26.2	1.182	6.32	18.791	1.788	93	241	0.4924	2.004	14.26	24.01	1.122
D089	5.75	10.79	0.408	5.57	9.093	0.61	30.25	162.9	0.4791	1.303	8.79	28.36	1.118
D090	10.79	23.5	0.579	11.71	7.473	1.472	34.02	81.8	0.2996	1.186	13.07	64.76	0.693
D091	8.65	11.16	0.225	4.37	14.787	0.795	29.78	159.8	0.2169	1.395	9.48	119.42	1.053
D092	6.02	22.49	0.332	5.94	10.162	0.713	34.44	97.4	1.2209	0.701	34.8	29.95	3.431
D093	2.95	43.6	0.382	4.07	11.848	0.829	66.88	523.8	0.5376	0.561	10.41	38.91	1.07
D094	13.9	19.72	0.27	6.23	9.002	0.871	39.06	60.9	0.2858	0.848	26.47	10.83	0.578
D095	4.77	52.06	0.713	6.61	5.954	0.896	34.9	441	0.4272	1.064	17.55	25.93	2.706
D096	4.65	56.16	0.22	12.27	7.596	0.73	39.5	212.6	0.4158	1.975	3.5	91.31	1.113
D097	9.16	30.99	0.459	8.47	8.488	0.174	34.94	106	0.2886	0.962	18.39	49.72	1.557
D098	3.59	30.48	2.107	16.54	14.67	4.138	46.86	848	0.6567	2.285	53.03	62.36	4.287
D099	5.22	39.95	0.205	9.63	5.936	1.518	19.5	169	0.3876	0.552	11.87	88.56	0.941
D100	3.95	21.64	0.967	15.19	11.799	3.31	23.76	243.7	0.4818	1.657	39.94	32.51	0.349
D101	8	9.75	0.675	5.89	4.774	0.604	11.72	128.5	0.2255	2.071	12.85	4.96	0.629
D102	5.34	4.54	0.635	8.1	23.232	1.649	24.44	263.7	0.7895	1.715	45.65	13.08	3.345
D103	11.26	38.96	1.465	37.92	9.163	3.864	15.71	234.3	0.7517	4.771	21.76	32.53	4.518
D104	4.25	24.49	0.58	6.73	4.086	0.206	17.39	248.1	0.382	1.167	17.54	84.92	1.383
D105	11.13	5	1.799	10.66	7.99	0.165	88.16	402.7	0.3941	1.989	20.76	37.18	4.94
F001	4.25	42.42	1.457	5.19	5.146	1.981	29.45	95.7	0.5437	2.758	37.95	112.04	2.701
F002	5.07	18.97	0.68	18.13	4.071	0.615	42.78	91.2	0.4077	3.119	13.23	44.89	2.537
F003	34.54	36.35	3.221	40.35	7.314	2.83	75.48	1032.1	0.3441	1.873	20.15	50.9	7.975
F004	13.59	20.48	0.808	5.18	1.719	0.819	4.9	198	0.3576	0.54	12.21	38.04	1.037
F005	3.16	9	1.227	6.75	5.654	1.626	45.86	162.7	0.8983	1.207	67.95	28.44	4.969
F006	9.23	16.53	0.666	15.87	17.262	0.392	37.08	181.6	0.2831	1.557	29.33	28.96	1.981
F007	3.63	6.02	1.421	8.4	5.826	4.59	16.74	165.9	0.5635	3.071	12.39	140.24	3.175
F008	6.06	13.63	0.762	6.44	4.568	0.573	23.87	360.5	0.2423	0.945	25.77	29.28	2.693
F009	1.48	19.41	0.4	4.03	19.336	0.638	42.75	139.5	0.2709	1.75	25.19	101.75	2.717
F010	11.24	17.65	1.099	11.95	2.17	0.445	63.83	387.2	0.4937	2.624	32.77	39.5	3.831
F011	4.03	27.7	0.455	2.57	8.998	1.778	73.5	269.7	0.4018	0.901	28.5	52.15	3.857
F012	8.76	22.09	0.249	6.73	8.895	0.546	24.5	159.5	0.6061	2.424	27.62	95.86	2.26
F013	2.95	11.71	0.859	18.41	8.03	1.952	28.19	134.9	0.4357	1.391	29.91	54.34	3.941
F014	7.12	5.4	1.041	4	14.578	1.779	57.14	230.9	0.9731	5.204	426.36	122.69	5.14
F015	4.93	15.68	2.31	7.93	2.425	1.865	69.72	301.3	1.8194	1.045	131.23	48.02	7.362
F016	6.41	25.92	0.785	17.96	4.674	1.153	8.47	302	0.5702	2.111	103.83	15.25	7.748
F017	7.99	17.35	1.086	8.35	13.9	0.884	60.12	362.1	1.038	2.717	44.47	68.61	2.74
F018	9.19	88.28	0.464	4.49	7.666	1.018	31.51	145.2	0.2841	1.511	50.67	169.21	1.565
F019	1.68	24.7	0.924	8.58	4.174	2.831	52.31	396.9	0.3932	1.542	9.51	55.42	2.821
F020	17.9	19.02	0.626	14.86	1.903	0.908	54.32	408.8	0.8066	2.617	29.75	20.66	2.394
F021	9.18	43.57	0.345	11.58	5.362	0.163	28.39	199.8	0.2495	0.764	84.55	42.17	3.182
F022	4.27	12.02	0.438	7.42	5.613	4.791	9.73	459.5	0.6585	1.952	32.43	37.59	3.718
F023	3.22	21.99	0.633	21.96	6.113	1.957	22.85	235.9	0.5365	1.635	8.43	51.28	1.609
F024	9.27	11.43	0.301	10.4	6.44	0.76	27.73	221.1	0.8791	1.925	17.96	33.98	0.884
F025	3.89	14.24	0.771	7.86	4.814	0.664	46.49	93.6	1.4773	1.5	46.24	69.51	6.091
F026	6.88	15.18	0.882	6.84	4.749	0.267	17.08	241.7	0.3066	2.399	16.74	63.92	1.023
F027	5.84	10.09	0.746	16.63	4.741	1.663	16.92	82.7	0.4067	2.317	35.97	48.7	13.127
F028	1.76	10.35	0.694	8.66	7.467	0.584	31.74	247.6	0.4926	2.407	14.73	24.72	2.028
F029	14.04	15.17	1.047	13.71	11.581	3.485	39.46	273	0.8523	3.39	43.52	74.3	0.29
F030	8.4	14.97	0.378	8.68	10.27	2.774	49.76	336.3	1.22	2.631	14.04	90.06	6.815
F031	10.33	9	0.541	15.85	13.516	1.747	34.13	618	0.6222	1.055	26.16	103.23	3.476
F032	10.91	15.96	1.406	5.41	13.221	0.758	7.69	273.2	0.3398	4.009	41.48	181.58	12.36
F033	12.68	33.83	0.724	16.45	2.119	0.495	25.24	59.5	0.6679	2.301	95.75	82.11	6.189
F034	8.77	12.21	1.659	11.16	4.717	0.459	18.79	107.6	0.4214	2.233	71.1	43.19	2.045
F035	10.05	27.89	0.321	3.11	3.09	1.548	29.13	135	0.3562	1.552	37.41	35.24	1.748
F036	5.71	13.44	0.936	8.52	26.325	0.436	64.53	213.4	0.5015	1.068	99.77	82.42	1.297
F037	2.69	6.36	0.984	12.74	10.639	1.619	18.05	355	0.6643	1.438	22.36	101.44	4.711
F038	14.91	35.95	0.49	11.08	6.011	0.407	35.71	225.4	0.5192	1.631	57.28	43.34	2.541
F039	6.43	13.74	1.014	11.25	7.311	3.001	27.91	171.3	0.3738	0.834	43.83	52.18	3.403
F040	3.17	10.7	1.135	4.36	11.364	2.983	102.02	145.1	0.8339	6.179	27.69	42.11	10.478
F041	6.28	35.45	0.758	14.54	4.767	1.806	25.68	229.8	1.0593	3.581	145.98	133.98	6.354
F042	11.79	20.71	0.924	10.95	19.498	3.552	21.14	125.3	0.6698	1.575	114.11	186.65	1.209
F043	23.8	35.94	1.381	32.61	8.18	1.069	48.42	127.9	0.9261	6.394	67.09	88.72	6.211
F044	14.05	19.81	0.542	12.92	18.195	1.053	12.46	46.3	0.5659	1.613	36.52	194.17	2.35
F045	9.74	28.16	0.75	16.18	11.438	0.934	35.83	366.3	0.1095	2.092	34.48	76.24	4.232
F046	4.83	14.16	0.627	6.51	7.319	4.486	31.93	560	0.5707	2.49	27.51	30.02	0.996
F047	3.23	19.61	1.086	13.24	5.503	2.708	35.9	118.6	0.4911	3.735	107.86	12.55	2.659
F048	6.97	20.65	0.373	9.41	3.113	0.993	14.17	46.6	0.1057	1.158	16.67	59.17	1.598
F049	12.11	18.66	0.786	6.15	2.531	1.173	54.36	57.1	0.6398	1.274	10.43	96.88	5.42
F050	6.9	51.65	1.483	20.79	5.25	2.637	69.62	349	1.0824	6.481	54.87	19.83	15.49
F051	3.53	4.81	0.478	8.83	4.156	1.021	19.92	93.6	0.1233	1.394	7.62	44.3	3.796
F052	6.7	36.52	0.719	13.33	4.356	4.224	28.19	62.9	0.3855	0.534	42.52	14.4	1.944
F053	11.46	35.66	0.902	7.27	6.397	1.604	116.87	271	0.6641	2.415	26.05	34.94	3.61
F054	7.56	30.22	0.751	12.46	4.943	5.116	22.07	133.4	0.6232	1.879	40.08	84.61	2.662
F055	3.31	39.16	0.631	7.26	1.976	2.588	24.38	386.1	0.2311	1.865	20.81	19.97	3.222
F056	13.65	26.03	1.896	16.51	2.121	1.42	46.92	96.2	0.4381	1.614	52.66	87.97	1.501
F057	4.48	29.59	0.488	5.51	7.574	1.316	22.68	115	0.38	1.351	28.84	37.1	0.998
F058	16.12	74.9	0.627	14.74	8.012	1.871	81.6	359.9	0.4175	0.705	52.87	13.15	2.452
F059	4.26	12.71	0.519	9.09	5.415	1.945	74.87	289.9	1.112	1.37	9.5	15.97	1.863
F060	7.71	13.35	1.036	9.38	6.248	0.304	42.09	234.5	0.8275	4.091	62.45	85.58	1.405
F061	16.78	99.53	1.218	10.12	15.873	1.562	92.16	122.9	1.2497	2.274	26.46	26.71	4.289
F062	3.58	15.17	0.508	4.39	7.145	0.821	44.86	226.1	0.2507	1.355	45.8	24.67	2.178
F063	7.45	36.41	1.424	13.69	3.938	1.237	28.8	215.7	0.73	6.851	95.41	38.86	8.39
F064	5.49	28.66	1.586	9.29	8.184	0.406	12.14	232.2	0.7353	3.114	8.2	61.2	13.211
F065	5.8	12.96	2.527	7.36	3.365	2.725	12.2	437	1.751	7.768	18.75	98.27	6.022
F066	14.57	34.03	0.796	15.87	6.182	0.658	40.89	202.8	0.8387	0.961	65.27	187.17	4.073
F067	5.86	10.28	0.865	4.38	8.805	3.041	24.59	451	0.4472	1.749	31.78	31.08	3.951
F068	15.64	66.51	1.517	13.19	6.563	1.08	21.13	145.5	0.1115	0.898	55.23	30.68	0.943
F069	24.96	27.16	0.254	32.54	7.828	1.009	33.43	254.2	0.6901	1.4	66.67	43.4	0.914
F070	6.19	27.62	0.665	3.78	4.315	0.81	47.12	212.3	0.4463	2.345	73.66	25	1.765
F071	6.55	58.74	1.758	9.92	8.613	2.31	28.71	446.5	0.2445	1.298	34.93	18.51	0.793
F072	6.03	32.61	0.689	2.15	14.815	3.107	82.53	683.6	1.3929	1.755	46.24	62.21	4.228
F073	6.12	16.57	0.622	14.28	11.394	0.358	30.05	113.3	0.3736	1.756	4.57	38.19	1.427
F074	7.39	10.38	0.535	14.77	2.066	1.742	53.03	304.7	0.5156	1.333	26	43.59	2.853
F075	3.86	13.21	1.65	9.52	10.392	1.574	53.15	386.4	0.708	2.248	21.76	154.26	2.768
F076	18.42	12.81	0.464	17.95	2.493	4.829	43.04	77.9	0.8227	1.541	12.39	16.9	10.141
F077	5.75	10.2	0.498	2.66	0.999	0.748	25.45	187.3	0.1678	8.745	10.64	56.47	11.226
F078	10.71	16.54	1.821	17.16	15.082	1.159	66.18	75.9	1.3755	5.697	37.74	74.97	9.243
F079	5.1	9.05	0.453	12.53	19.077	0.369	62.21	495.4	0.5263	2.406	14.46	29.19	5.112
F080	10.19	20.54	0.627	44.49	25.469	0.174	24.34	92.4	0.3346	1.259	12.01	127.76	4.23
F081	3.94	7.84	0.732	9.48	12.624	2.062	102.37	178.2	1.0225	0.53	4.48	24.3	0.85
F082	8.31	27.51	0.933	35.34	9.901	1.262	36	220.8	1.1169	0.895	77.21	65.35	1.179
F083	4.65	19.74	0.82	14.26	7.738	1.537	74.63	192.7	0.2781	2.552	26.45	83.44	3.944
F084	5.41	18.31	2.071	8.96	3.813	0.358	13.48	291.6	0.5135	2.237	10.45	39.52	7.784
F085	6.18	31.49	0.644	10.16	4.074	0.396	22.33	155	0.4543	1.559	29.02	29.33	2.962
F086	14.33	24.67	1.107	15	9.908	1.02	77.24	308.6	0.2996	2.431	36.07	23.18	4.846
F087	8.39	8.3	0.64	4.24	3.381	3.66	13.73	146.8	0.6206	1.778	14.87	116.2	1.686
F088	4.66	7.07	0.228	7.99	7.629	1.1	37.97	430.7	0.1029	0.868	41.31	15.45	4.193
F089	2.1	10.84	1.054	8.62	5.44	4.248	52.28	365.4	0.3533	0.544	30.98	13.46	2.138
F090	5.98	5.93	0.774	8.09	10.349	1.671	44.48	114.9	0.4844	0.797	10.6	53.9	1.532
F091	9.31	21.05	1.896	4.61	19.49	1.695	25.99	235.1	0.4777	3.591	42.82	69.82	3.557
F092	10.16	34.28	0.941	5.83	20.184	1.134	59.81	162.9	0.3431	1.774	54.92	36.16	2.308
F093	12.91	6.27	0.873	6.68	3.8	1.158	74.72	183.3	0.2857	0.444	11.3	21.52	1.838
F094	8.16	100.05	1.397	11.95	3.491	2.708	58.67	164.7	1.9377	11.155	18.86	104.54	3.475
F095	5.45	35.29	1.127	6.86	10.365	1.409	30.47	53.2	0.4122	1.959	27.23	62.47	3.135
F096	4.47	45.87	1.336	5.69	11.23	0.91	52.64	172.1	0.3145	2.654	29.35	39.94	7.246
F097	6.17	30.82	0.947	9.55	11.057	3.144	36.72	134.6	0.8213	2.094	28.75	125.26	0.781
F098	11.94	64.43	0.492	9.76	10.164	0.832	31.61	201	0.2622	1.92	10.27	63.61	1.99
F099	4.04	18.51	0.87	16.41	6.989	1.483	36.38	262.7	0.6012	3.771	17.69	54.17	0.805
F100	18.59	54.2	0.617	7.91	5.034	3.143	61.68	316.5	0.5527	1.9	7.8	28.14	0.671
F101	3.01	19.41	0.341	7.03	6.327	0.591	16.96	138.3	0.3275	0.643	6.01	40.14	1.629
F102	7.81	12.17	0.934	6.3	7.85	2.713	57.37	593.1	0.695	2.265	39.91	70.02	1.35
F103	6.29	96.04	0.455	6.91	13.013	1.619	23.62	125	0.3803	0.726	36.09	59.99	0.766
F104	16.16	11.91	1.274	23.13	9.476	1.281	15.72	117.9	1.1905	0.652	60.98	93.79	5.142
F105	10.17	22.16	4.625	44.42	7.757	0.893	62.51	387.5	1.5268	4.607	241.01	61.2	5.86
L001	14.62	15.34	1.766	6.76	6.437	0.831	21.49	78.8	0.8357	2.382	50.85	20.99	1.577
L002	6.94	14.43	0.621	6.51	5.739	1.239	6.2	133.1	0.4271	1.931	24.45	34.5	4.92
L003	12.08	18.8	0.604	19.29	6.822	0.441	28.03	120.6	0.608	0.663	42.55	70.4	2.92
L004	6.73	9.18	0.958	7.41	4.639	3.275	82.57	463.5	0.2783	2.226	51.92	17.45	3.773
L005	6.49	26.19	2.309	11.75	6.42	3.35	128.36	1203.8	0.3995	3.318	28.89	75.76	1.891
L006	6.87	11.27	0.276	3.41	7.321	4.567	25.57	119.1	0.1279	0.806	8.39	70.79	2.219
L007	6.08	125.41	2.486	7.58	12.607	2.571	35.64	440	0.9167	10.191	25.89	47.48	24.404
L008	9.16	23.1	0.592	12.29	4.713	0.84	57.18	355.4	0.4528	1.188	17.36	36.15	3.8
L009	2.86	27.1	0.177	9.25	9.835	0.265	50.89	228.4	0.3074	2.37	17.12	62.2	3.162
L010	3.05	16.24	0.088	8	1.971	1.69	77.48	326.4	0.1219	1.201	21.25	31.36	3.503
L011	9.86	44.28	0.462	8.51	1.935	3.299	8.87	105.2	1.3526	1.854	12.49	44.95	4.759
L012	7.93	19.93	1.045	9.58	11.265	1.057	58.3	365.4	1.8549	1.38	31.74	47.22	1.104
L013	3.42	63.42	0.922	5.62	15.185	0.551	59.49	154.4	0.0756	0.92	13.97	29.32	3.371
L014	5.47	17.15	0.567	14.39	5.063	1.343	18.8	408.6	0.8439	1.44	25.02	46.09	16.906
L015	5.37	59.65	0.605	13.43	7.034	0.662	72.3	184	0.108	1.199	19.98	13.73	0.519
L016	51.61	50.92	1.986	39.59	12.155	4.048	16.54	324	0.8249	1.427	35.65	53.37	4.05
L017	11.02	36.24	0.46	10.87	4.896	1.786	39.47	295.3	1.5719	2.848	41.25	34.8	6.242
L018	5.88	17.31	3.409	11.21	11.449	4.442	19.09	183.7	0.1846	2.299	17.91	13.1	5.169
L019	6.37	15.18	0.978	23.3	11.994	1.956	39.49	479.7	0.51	1.308	41.39	77.17	4.21
L020	5.74	21.21	0.517	12.16	7.539	3.338	59.13	452.7	0.1502	1.343	30.76	21.89	2.523
L021	4.21	16.62	0.673	9.35	5.587	3.76	85.93	745.7	0.324	3.027	12.93	40.56	1.802
L022	13.18	41.93	2.18	8.08	10.449	2.274	49.64	240.3	0.3715	4.143	16.45	113.89	1.552
L023	10.29	10.09	1.297	28.63	11.671	0.166	53.8	178.8	0.5994	2.027	17.31	17.61	3.419
L024	4.57	19.31	0.883	8.15	9.288	5.211	21.36	122.4	0.9496	3.626	52.31	13.48	2.114
L025	14.52	25.15	5.712	16.07	43.106	7.437	168.3	705.6	0.4776	3.688	23.5	168.89	15.005
L026	33.62	10.5	1.185	9.56	4.169	2.925	55.29	324.4	0.5315	2.868	21.71	55.85	2.71
L027	4.13	15.31	1.306	10.63	5.64	0.569	21.83	117.3	0.4876	1.538	149.89	64.84	3.479
L028	11.54	12.48	0.586	19.74	7.567	1.889	46.94	180.6	1.4444	1.608	22.36	7.94	2.055
L029	7.41	19.27	1.308	7.04	9.227	0.862	51.6	422.6	0.8273	1.087	16.17	18.17	3.978
L030	19.15	17.55	1.315	11.62	4.588	3.749	26.6	101.1	0.7414	3.219	7.09	11.91	2.572
L031	8.17	22.98	1.721	11.18	13.073	4.308	16.91	185.8	0.8007	1.453	13.32	56.4	1.478
L032	6.28	9.33	1.629	10.93	7.679	2.614	86.76	271.2	0.1237	1.435	21.93	46.47	4.059
L033	5.95	14.78	0.789	8.4	11.287	3.816	124.8	259.4	0.5651	2.792	11.7	188.48	1.539
L034	7.51	15.32	0.453	3.76	7.356	0.693	53.53	664	0.6093	3.791	23.2	76.84	2.923
L035	8.49	61.93	1.279	6.16	9.968	1.582	101.88	117	0.6468	2.515	149.89	10.29	1.944
L036	5.9	52.96	0.257	13.81	21.757	4.211	37.24	87.4	0.213	1.642	44.78	42.09	1.871
L037	18.89	40.38	0.678	22.99	6.03	0.704	44.94	230.7	0.8387	1.647	43.72	23.6	7.053
L038	24.2	53.23	1.175	35.97	24.74	3.482	85.28	1045.4	0.8146	3.194	66.76	79.01	5.318
L039	7.14	39.26	2.029	18.54	9.261	2.39	35.39	1158.6	0.6272	2.114	64.47	13.27	2.513
L040	3.94	3.87	0.943	4.11	8.325	1.134	19.4	262.1	0.111	0.203	6.64	53.84	0.773
L041	8.01	41.5	0.119	7.61	1.874	2.276	39.89	295.8	0.7474	3.409	47.97	23.15	1.273
L042	8.44	5.86	1.156	9.9	22.685	1.135	47.45	221.7	0.7292	3.076	74.77	103.52	1.987
L043	11.25	6.31	1.3	10.01	11.383	1.776	38.79	421.4	0.6513	1.103	85.76	18.24	6.125
L044	15.78	52.86	0.913	13.25	7.394	2.773	12.27	87	0.8756	2.174	64.03	59.88	6.105
L045	10.57	11.38	1.678	14.73	10.588	2.02	11.6	204.4	1.7492	1.741	937.17	70	4.469
L046	16.69	16.77	1.237	10.42	10.647	1.13	148.46	441.7	1.6416	4.242	47.31	39.71	9.802
L047	12.44	16.33	1.895	18.96	8.408	0.72	24.76	250.1	0.3693	4.131	31.48	79.8	2.24
L048	2.94	6.68	0.421	12.74	9.659	1.551	31.76	77.4	0.3709	1.342	39.76	50.23	2.505
L049	5.29	23.09	0.896	14.93	2.456	2.413	76.71	1230.5	0.4796	3.955	14.36	29.56	1.958
L050	9.97	7.58	0.934	12.28	5.68	3.322	64.5	104.2	0.3819	1.443	28.07	57.38	1.525
L051	3.37	12.94	2.974	13.96	2.822	7.284	102.62	220.5	0.7727	2.663	13.97	35.09	1.934
L052	8.34	16.57	2.358	11.83	9.466	2.868	63.89	141.2	1.0323	1.839	38.05	63.33	0.312
L053	8.29	15.13	1.613	4.52	11.217	3.793	76.12	670.5	1.0759	5.388	9.05	73.55	2.163
L054	12.47	23.55	1.415	6.52	13.438	3.523	117.63	185.7	1.2375	4.251	41.04	57.39	1.598
L055	7.2	14.75	1.458	8.6	4.997	0.357	16.55	122.3	0.8328	1.724	29.6	20.74	2.372
L056	9.87	40.67	1.045	6.56	8.203	0.566	30.46	184	0.2664	0.97	20.16	6.98	1.302
L057	5.27	8.97	1.285	10.66	8.629	1.193	35.59	342.1	0.4593	5.042	12.94	78.46	1.316
L058	14.31	37.35	1.415	14.02	7.858	0.642	21.49	699.6	0.4998	2.241	44.22	40.9	1.604
L059	2.21	10.93	0.585	5.11	5.852	1.233	42.79	205.6	0.3138	1.899	11	39.45	1.09
L060	5.72	41.21	0.724	11.39	5.036	0.775	48.26	202.6	1.4413	0.671	11.35	24.08	3.049
L061	7.28	40.17	0.52	6.77	1.464	0.256	57.57	98.5	0.488	1.741	13.56	42.93	1.426
L062	5.45	112.35	2.952	10.9	10.987	2.54	35.09	656.8	0.9417	12.015	113.72	77.39	24.275
L063	18.93	46.43	0.658	11.73	1.344	1.096	35.88	246.3	0.6229	2.2	11.14	7.48	3.969
L064	6.14	675.34	0.58	15.13	12.683	4.677	31.53	171.4	0.3535	0.637	168.67	98.6	3.773
L065	5.69	40.11	0.767	18.45	5.455	1.35	35.48	134.5	0.2737	0.277	11.74	10.17	1.7
L066	3	6.03	1.903	25.97	23.272	1.325	31.17	404	1.5085	3.469	21.49	147.42	3.797
L067	4.62	14.07	0.663	11.5	8.604	0.99	6.91	197.3	0.4089	1.251	40.13	22.75	1.919
L068	18.88	14.72	1.106	30.07	19.762	1.025	23.68	255.9	0.6328	3.673	64.53	20.88	1.396
L069	17.27	17.58	0.647	26.97	11.035	2.185	42	734.5	1.8382	2.175	55.03	28.95	2.528
L070	6.02	10.51	0.552	8.66	16.599	1.929	116.67	642.2	0.338	2.264	26.81	19.31	3.395
L071	7.33	31.67	0.531	8.77	8.887	0.801	44.07	107.8	0.2921	1.789	17.04	9.5	3.382
L072	9.02	20.72	0.761	5.82	3.841	3.008	114.24	1221.2	0.3554	2.113	12.44	51.08	1.067
L073	7.23	17.18	1.243	12.16	5.523	2.19	44.48	390.7	0.4051	1.739	18.19	21.84	2.021
L074	14.06	69.49	2.935	14.96	6.45	6.129	57.47	676.5	0.387	3.107	38.78	133.7	7.71
L075	5.12	21.31	0.866	16.17	6.382	4.268	25.86	48.4	0.336	3.188	15.5	12.34	1.596
L076	13.61	9.26	7.455	32.37	9.23	2.07	38.63	221.6	1.3943	3.015	128.55	53.02	2.39
L077	10.19	28.72	2.529	12.47	1.51	0.331	40.91	321	0.8123	2.037	102.51	15.52	3.452
L078	11.36	29.35	1.226	15.65	5.116	1.884	13.18	155.8	0.5191	2.886	74.96	11.35	2.455
L079	10.38	3	0.829	23.23	6.799	2.122	30.11	167.6	0.6787	3.552	50.81	22.14	13.658
L080	7.14	14.7	0.852	9.17	15.796	2.149	67.22	107.7	0.1245	1.435	13.4	38.65	2.974
L081	1.92	14.16	0.887	10.02	10.436	0.498	29.4	415.7	0.1506	1.029	17.52	115.22	1.253
L082	17.57	111.08	0.696	6.55	26.699	0.895	45.05	156.5	0.5109	1.035	13.63	64.22	1.942
L083	4.28	25.47	2.038	13.72	14.788	2.77	41.78	209.3	0.2349	2.664	27.63	52.23	4.184
L084	18.52	40.47	1.863	7.81	21.241	1.441	80.76	161.2	1.1741	5.7	134.96	156.11	3.893
L085	5.86	6.32	0.982	10.68	4.805	0.681	83.84	227.6	0.4574	0.459	30.5	25.23	2.075
L086	6.69	11.75	0.496	11.89	16.848	0.775	26.74	200.2	0.5419	0.676	6.85	35.06	1.19
L087	13.38	6.74	1.027	8.65	5.607	2.1	30.28	149.3	0.6611	1.774	22.27	40.29	2.022
L088	12.67	27.11	0.672	22.27	14.92	1.789	28.32	191.3	0.4302	0.956	74.43	28.22	4.682
L089	6.72	14.09	0.61	12.1	3.863	0.832	12.03	179	0.3821	0.462	7.04	22.78	2.23
L090	4.89	18.35	0.721	3.51	7.982	0.878	95.21	460	0.1957	1.21	41.51	40.1	1.977
L091	9.52	26.03	0.811	10.37	10.007	1.539	47.23	345.1	0.6168	1.996	92.07	51.75	0.845
L092	11.14	34.08	0.84	23.87	15.853	2.263	76.63	453.2	0.092	1.652	25.32	39.85	4.704
L093	4.22	16.91	0.871	9.37	14.111	2.224	57.61	217.4	0.3201	2.767	32.48	17.62	5.635
L094	6.6	4.7	0.262	13.17	9.8	3.528	52.02	633.7	0.4715	2.794	8.53	44.12	7.078
L095	4.6	24.33	0.597	14.98	12.399	0.418	47.47	731.2	0.5768	1.066	10.01	16.38	2.644
L096	16.33	19.68	0.381	11.78	4.115	1.996	10.93	221.1	0.8884	0.321	24.72	27.87	3.394
L097	18.54	31.82	1.626	37.14	7.598	2.025	46.15	1117.1	0.2957	2.29	58.59	125.76	2.046
L098	8.06	15.58	1.524	8.99	13.078	1.213	49.67	355	0.3773	2.619	10.26	21.47	2.646
L099	8.78	13.56	1.135	3.14	3.421	3.683	24.26	188.8	0.3115	1.178	11.4	51.34	1.33
L100	8.31	39.45	0.763	32.59	8.574	2.013	13.83	205.3	0.7053	1.442	27.03	17.33	1.083
L101	2	9.52	0.93	12.25	20.83	0.34	24.98	63.2	0.4942	2.005	12.36	7.32	1.778
L102	10.02	9.75	1.11	16.55	11.877	4.177	116.49	978.4	0.4883	2.207	38.8	71.64	3.442
L103	4.6	13.09	0.737	4.18	6.391	0.596	33.92	274.5	0.3587	1.303	20.99	20.18	2.135
L104	38.64	102.4	1.101	23.33	21.577	2.739	36.48	151.8	0.8369	1.399	26.99	4.78	3.398
L105	15.62	23.71	0.371	21.53	4.79	1.64	70.8	200.4	0.4777	1.703	24.44	36.03	1.574
L106	2.06	623.95	0.61	1.53	10.184	1.214	24.33	73.9	3.7851	9.3	2345.39	127.55	1.219
L107	6.66	16.23	0.549	13.12	4.597	0.322	27.2	160.9	0.2793	1.751	15.52	9.01	1.683
L108	30.85	20.13	6.996	19.27	7.532	3.228	12.98	266.3	0.5524	7.233	292.2	34.52	10.582
L109	11.09	18.9	0.466	17.69	11.922	0.853	26.2	240	0.7197	1.875	20.42	72.57	1.149
L110	7.51	31.98	0.736	7.75	4.224	9.111	122.95	438.3	0.4708	2.772	10.21	56.91	4.314
L111	4	115.04	0.824	8.65	39.137	2.223	87.05	587.6	0.4649	1.429	21.38	90.84	2.915
L112	3.63	12.15	0.832	9.19	10.19	1.798	85.19	294.7	0.3303	2.325	13.12	39.88	7.228
L113	3.03	42.78	0.801	9.26	13.739	1.802	52.37	334.8	0.3946	2.417	32.72	19.26	1.653
L114	9.36	13.78	1.774	19.75	4.552	0.612	51.87	129.8	0.6119	3.552	30.83	22.24	2.078
L115	12.6	10.08	0.711	11.19	13.642	2.546	87.02	469.1	0.5477	1.477	37.46	21.54	1.257
L116	24.59	34.11	4.707	22.48	3.891	4.053	54.89	209.5	0.8638	1.934	212.2	13.9	1.381
L117	6.01	61.74	0.47	6.31	7.5	3.368	40.09	98.4	0.4142	2.782	8.96	28.36	1.217
L118	7	38.93	0.576	5.53	10.742	2.725	17.77	175.5	0.3295	1.186	26.6	53.08	1.787
L119	12.63	23.09	0.991	13.26	8.176	0.647	9.95	97.8	0.391	1.178	46.49	14.67	7.388
L120	4.91	22.87	0.506	15.34	5.698	2.119	93.2	468.8	0.3236	1.522	9.23	6.37	0.868
L121	14.98	27.26	0.657	12.75	16.211	3.437	22.34	208.9	0.3026	2.546	76.38	22.25	2.172
L122	4.24	10.48	1.817	2.66	5.387	2.842	23.08	122.5	0.4107	4.035	16.61	50.87	2.912
L123	13.28	17.05	3.373	5.32	6.778	1.705	74.84	200.9	0.2802	2.088	27.84	51.06	5.39
L124	1.87	12.66	0.623	10.53	5	0.266	66.16	56.3	0.127	0.321	44.4	22.28	0.956
L125	6	11.56	0.59	15.01	15.303	0.483	29.41	312	0.1553	1.106	26.18	44.34	1.623
L126	5.03	10.65	0.408	7.64	2.325	1.822	10.87	341.9	0.3248	1.518	8.09	22.11	2.061
