# Supplementary material for: Deep learning-based phenotype prediction analysis of genotype-environment interactions and mining of environmentally stable germplasm and elite loci in cotton
Source: Research Square preprint supplement (doi:10.21203/rs.3.rs-7483914/v1), 2025-09-11
Supplement: Supplementary file 2 [file 4a9f86af6dcac950510e2c7d.xlsx]

## Sheet: stable varieties
Supplementary Table 7. Multi-trait multi-environmentally stable varieties of 419 upland cotton.
Trait categories	Mult-trait combinations	Stable varieties	Group in the phylogenetic tree
All traits	FL、LU、GP	F001、D029	G1、G3
	FL、FS、LU	F005、F040	G2、G3
	FD、FWPB、BPP	L018、L121	G1、G3
	FD、BPP、SI	L100、L068	G1、G2
	FL、LU、FWPB	F096、L090	G2
	FL、FS、SBno、LP	D039、L051	G2
	SBno、FD、GP、BW	B058、D025	G2
Fiber quality-related traits	FL、FS、M	F022、D016、L048、F088、B013、D070、B081、F051、F059	G2、G3
	FL、FS、LU	F005、L103、L040、F040、D064、L059、L122	G1、G2、G3
	FL、M、LU	F062、D086、F011、D093、D032、F057、F009	G1、G2
	FS、M、LU	D003、B014、L006、D089、F077、D091	G2、G3
	FL、FS、M、LU	D010、D076、B020	G1、G2
Growth period-related traits	SBno、FD、GP	L011、B058、F048、D081、D025、B050、F027、B043、F051	G2、G3
	SBnode、FD、GP	L027、B024、F080、D046、B065、F101、L119、B080、L101	G1、G2、G3
	SBno、SBnode、FD	F008、F085、F077、D104、F026、D052、F084	G1、G2、G3
	SBno、SBnode、GP	L061、L124、F002、F025、D087、D054、L114	G1、G2、G3
	SBno、SBnode、FD、GP	F034、F033、D018、L055、D101	G2、G3
Fiber yield-related traits	BW、LP、SI	B060、B022、F004、F090、D099、D093、B038、F081、D020、L086、D003	G1、G2、G3
	FWPB、BW、SI	D071、L081、F086、D019、D046	G1、G2
	FWPB、BW、LP、SI	D090、B034、B073、L040、L099	G2
	FWPB、BW、LP	B074、B002、F101、L013、L006	G2、G3
	FWPB、BW、LP、BPP	F093、D073、L065、D026、D008	G2、G3
	FWPB、LP、BPP	L075、L126、L107、B067	G1、G2
	FWPB、LP、SI	B046、L059、D091、D082	G2
	FWPB、BW、BPP、SI	D094、L124、L056	G2
	FWPB、BW、BPP	B049、F088、D050	G2
	BW、BPP、SI	B009、D070、D007	G1、G2、G3
	BW、LP、BPP	L095、D060、L089	G1、G2
	FWPB、BPP、SI	L015、F071	G2
	FWPB、LP、BPP、SI	D101、L120	G2、G3
	FWPB、BW、LP、BPP、SI	D002	G2
	BW、LP、BPP、SI	D021	G1

## Sheet: unstable varieties
Supplementary Table 7. Multi-trait multi-environmentally unstable varieties of 419 upland cotton.
Trait categories	Mult-trait combinations	Unstable varieties	Group in the phylogenetic tree
All traits	SBno、FD、GP	B021、L070、B028、D022	G1、G2、G3
	M、SBno、BW	D063、L098	G2、G3
	LU、FD、BW、BPP、SI	F083、B053	G2、G3
	FL、M、FD、SI	L123、D009	G2
	SBnode、GP、SI	B077、F067	G1、G2
	M、FWPB、BW	D039、D011	G2
Fiber quality-related traits	FL、M、LU	L076、B047、F056、L108、L078、L097、L047、F104、L025、B059	G2、G3
	FL、FS、LU	D025、L038、F033、L037、L104、L092、F058、D014、F066、B035	G1、G2、G3
	FL、FS、M、LU	D013、L074、D074、F003、L058、B064、L116、F043、L016	G1、G2、G3
	FL、FS、M	B069、D054、L084、L022、F061、B048、F068、D066	G1、G2
	FS、M、LU	D006、F050、B063、L039	G1、G2
Growth period-related traits	SBno、FD、GP	D022、L111、B021、D045、D068、B047、D075、D062、D093、L070、D064、L092、B039、B028	G1、G2、G3
	SBnode、FD、GP	L072、L005、L004、L021、B032、D023、L049、D027、F003、L053、L110、D060	G1、G2、G3
	SBno、SBnode、FD、GP	D036、L102、L038、L115、B019、F072、L025、B030、B064	G2、G3
	SBno、SBnode、GP	L007、D098、B051	G1、G2
	SBno、SBnode、FD	D076、L054、B068	G1、G2
Fiber yield-related traits	FWPB、BW、SI	D103、B051、L007、L017、F040、D059、D029	G1、G2、G3
	FWPB、BW、LP、BPP、SI	L038、L062、F014、B052、L053、F094	G1、G2、G3
	FWPB、BW、BPP	B053、L025、F032、F083、D086、L074	G1、G2、G3
	BW、BPP、SI	D015、L106、D001、F060、B057	G2
	FWPB、BW、LP、BPP	F005、L037、F015、F072、L044	G1、G2、G3
	FWPB、LP、SI	L046、F050、F105、B063、B059	G1、G2、G3
	FWPB、BW、LP、SI	L079、F063、B004、D074、L108	G1、G2
	BW、LP、SI	F104、F025、F066、L045	G2、G3
	FWPB、LP、BPP、SI	L076、F017、L024、L041	G1、G2
	FWPB、BW、LP	F078、F030、F065	G2
	FWPB、BW、BPP、SI	D031、D056	G1、G2
	FWPB、BPP、SI	D051	G2
	FWPB、LP、BPP	L042	G2
	LP、BPP、SI	F033	G2
