# Supplementary material for: Deep learning-based phenotype prediction analysis of genotype-environment interactions and mining of environmentally stable germplasm and elite loci in cotton
Source: Research Square preprint supplement (doi:10.21203/rs.3.rs-7483914/v1), 2025-09-11
Supplement: Supplementary file 3 [file 6a63fce2d6acc811dda2943d.xlsx]

## Sheet: shared SNPs
Supplementary Table 12. The shared SNPs associated with traits of 419 upland cotton from GWAS based on three parameters.
Parameter catagories	Traits	Chromosome	Maker	Position (bp)	allele1	allele0	P-value
Phenotype value, phenotypic plasticity parameters, and environmental adaptation parameters	FD	D03	D03_20084293	20084293	C	T	2.4613e-11
	FD	D03	D03_32141730	32141730	T	G	2.28121e-12
	FD	D03	D03_32150956	32150956	G	T	2.73761e-12
	FD	D03	D03_32241802	32241802	C	A	1.31834e-11
	FD	D03	D03_32266417	32266417	G	A	1.49069e-12
	FD	D03	D03_32270315	32270315	G	C	6.6013e-13
	FD	D03	D03_32447866	32447866	C	T	6.42163e-12
	FD	D03	D03_32891947	32891947	C	T	3.52089e-11
	FD	D03	D03_38938264	38938264	T	C	2.16324e-10
	FD	D03	D03_38957276	38957276	A	G	8.82594e-14
	FD	D03	D03_38987361	38987361	G	A	1.51672e-14
	FD	D03	D03_39036788	39036788	A	G	1.51148e-13
	FD	D03	D03_39059385	39059385	T	G	1.27581e-14
	FD	D03	D03_39145574	39145574	A	G	5.12077e-11
	FD	D03	D03_39302247	39302247	T	C	1.97886e-12
	FD	D03	D03_39378324	39378324	A	G	5.80965e-15
	FD	D03	D03_39459873	39459873	T	C	4.08487e-16
	FD	D03	D03_39497921	39497921	T	C	9.35675e-15
Phenotype value and phenotypic plasticity parameters	BPP	D01	D01_2090718	2090718	C	T	3.28394e-08
	BPP	D01	D01_2098229	2098229	A	C	8.26886e-07
	BPP	D01	D01_2099004	2099004	T	C	2.61148e-07
	BPP	D01	D01_2099049	2099049	T	C	8.73696e-07
	BPP	D01	D01_2107544	2107544	A	G	8.98305e-07
	BPP	D01	D01_2108605	2108605	T	C	5.16115e-07
	BPP	D01	D01_2127498	2127498	A	G	6.08332e-07
	BPP	D01	D01_2128415	2128415	T	C	8.52884e-07
Phenotype value and environmental adaptation parameters	BPP	D03	D03_39082094	39082094	T	C	4.08147e-07
	FD	D03	D03_6413121	6413121	A	G	6.71914e-08
	FD	D03	D03_6456840	6456840	A	T	6.33534e-10
	FD	D03	D03_6462527	6462527	T	C	2.29576e-08
	FD	D03	D03_6629790	6629790	A	G	1.02766e-09
	FD	D03	D03_6850857	6850857	T	G	3.21916e-08
	FD	D03	D03_6923832	6923832	A	T	2.70173e-09
	FD	D03	D03_8283737	8283737	T	C	2.63533e-10
	FD	D03	D03_8384895	8384895	T	C	3.99935e-10
	FD	D03	D03_8434200	8434200	A	G	2.19238e-09
	FD	D03	D03_8442915	8442915	A	G	4.41352e-08
	FD	D03	D03_8613832	8613832	A	G	2.38614e-09
	FD	D03	D03_8969276	8969276	A	G	5.64806e-08
	FD	D03	D03_8972839	8972839	T	C	1.69171e-09
	FD	D03	D03_9009158	9009158	T	C	1.6242e-09
	FD	D03	D03_11767161	11767161	T	C	2.93691e-11
	FD	D03	D03_11937337	11937337	A	C	2.56457e-11
	FD	D03	D03_12223758	12223758	A	G	4.55589e-11
	FD	D03	D03_12356743	12356743	T	C	8.81101e-11
	FD	D03	D03_12402144	12402144	T	C	3.66601e-11
	FD	D03	D03_12452528	12452528	T	G	1.51438e-11
	FD	D03	D03_12525951	12525951	T	C	9.521e-10
	FD	D03	D03_12550687	12550687	A	G	2.16882e-11
	FD	D03	D03_12564028	12564028	T	C	4.88191e-11
	FD	D03	D03_12666878	12666878	T	C	2.79125e-11
	FD	D03	D03_12866965	12866965	T	C	2.09108e-11
	FD	D03	D03_12879837	12879837	A	G	2.16126e-11
	FD	D03	D03_13001983	13001983	T	C	9.93341e-12
	FD	D03	D03_13067766	13067766	T	C	4.86639e-11
	FD	D03	D03_13097995	13097995	A	G	9.20046e-11
	FD	D03	D03_13178906	13178906	T	G	9.21469e-10
	FD	D03	D03_13203222	13203222	A	G	7.59491e-10
	FD	D03	D03_13206050	13206050	T	C	8.85006e-10
	FD	D03	D03_13222662	13222662	T	C	1.24247e-09
	FD	D03	D03_13563114	13563114	G	A	8.97944e-10
	FD	D03	D03_13830742	13830742	T	C	1.31074e-10
	FD	D03	D03_13846946	13846946	T	C	1.50793e-11
	FD	D03	D03_14540855	14540855	A	C	2.64493e-10
	FD	D03	D03_14858860	14858860	T	C	4.88313e-12
	FD	D03	D03_14900494	14900494	G	T	3.06088e-11
	FD	D03	D03_14946357	14946357	T	C	3.84895e-11
	FD	D03	D03_14979226	14979226	C	G	1.56478e-11
	FD	D03	D03_14993393	14993393	T	C	3.26115e-11
	FD	D03	D03_15207816	15207816	G	T	5.65211e-10
	FD	D03	D03_15367340	15367340	T	C	1.52071e-11
	FD	D03	D03_15720805	15720805	A	G	1.95706e-10
	FD	D03	D03_15780763	15780763	T	G	1.99336e-11
	FD	D03	D03_15982763	15982763	T	C	1.52091e-09
	FD	D03	D03_16207558	16207558	A	C	2.51161e-11
	FD	D03	D03_16567267	16567267	A	G	1.46017e-11
	FD	D03	D03_16765857	16765857	T	C	2.03484e-11
	FD	D03	D03_16937465	16937465	G	C	3.37605e-11
	FD	D03	D03_17412579	17412579	T	G	1.83176e-11
	FD	D03	D03_17426327	17426327	T	A	9.49913e-11
	FD	D03	D03_17511702	17511702	A	G	2.94445e-11
	FD	D03	D03_17555741	17555741	A	G	1.16505e-09
	FD	D03	D03_17577963	17577963	A	G	1.89662e-11
	FD	D03	D03_17711647	17711647	C	T	6.69173e-10
	FD	D03	D03_17792270	17792270	T	C	2.97093e-10
	FD	D03	D03_17829428	17829428	G	C	2.09685e-11
	FD	D03	D03_17872478	17872478	T	G	1.46213e-10
	FD	D03	D03_17881259	17881259	T	C	4.23113e-11
	FD	D03	D03_18204058	18204058	G	A	8.80354e-11
	FD	D03	D03_18249860	18249860	T	C	4.08753e-11
	FD	D03	D03_18432078	18432078	A	G	3.90014e-11
	FD	D03	D03_18520030	18520030	T	C	1.36718e-11
	FD	D03	D03_18766666	18766666	T	C	4.56831e-12
	FD	D03	D03_18878901	18878901	A	G	2.46115e-11
	FD	D03	D03_18882013	18882013	A	G	2.89964e-11
	FD	D03	D03_18904283	18904283	T	A	4.28856e-11
	FD	D03	D03_18919640	18919640	A	G	1.95119e-11
	FD	D03	D03_19558150	19558150	A	G	1.2505e-11
	FD	D03	D03_19558683	19558683	G	T	9.52691e-10
	FD	D03	D03_19812003	19812003	G	C	1.87797e-11
	FD	D03	D03_19843532	19843532	T	C	3.68736e-11
	FD	D03	D03_19935210	19935210	A	G	5.09465e-11
	FD	D03	D03_20799856	20799856	T	C	4.62299e-08
	FD	D03	D03_21448955	21448955	A	C	2.26858e-10
	FD	D03	D03_21660681	21660681	A	G	1.0192e-07
	FD	D03	D03_21726765	21726765	T	C	5.10944e-08
	FD	D03	D03_22165517	22165517	A	G	5.26389e-08
	FD	D03	D03_22198777	22198777	A	G	3.44066e-07
	FD	D03	D03_22510782	22510782	T	G	6.66701e-07
	FD	D03	D03_22532351	22532351	T	C	4.59999e-08
	FD	D03	D03_22543728	22543728	T	C	5.48664e-07
	FD	D03	D03_22710753	22710753	A	G	3.60336e-09
	FD	D03	D03_22736336	22736336	G	A	5.23417e-11
	FD	D03	D03_22805326	22805326	T	C	1.43772e-08
	FD	D03	D03_23012304	23012304	A	G	1.12687e-07
	FD	D03	D03_23200710	23200710	T	C	1.99873e-07
	FD	D03	D03_23251964	23251964	G	C	1.50318e-08
	FD	D03	D03_23325141	23325141	A	C	3.51959e-07
	FD	D03	D03_23684703	23684703	A	G	1.11759e-07
	FD	D03	D03_23722548	23722548	T	C	5.68694e-08
	FD	D03	D03_23824432	23824432	T	C	4.92664e-08
	FD	D03	D03_24018525	24018525	T	C	7.00496e-08
	FD	D03	D03_24028275	24028275	G	T	3.6248e-07
	FD	D03	D03_24093064	24093064	A	G	8.48033e-09
	FD	D03	D03_24216876	24216876	A	G	7.67885e-09
	FD	D03	D03_24578944	24578944	T	C	4.35537e-07
	FD	D03	D03_24607075	24607075	A	G	1.14265e-09
	FD	D03	D03_24635335	24635335	A	G	1.00245e-08
	FD	D03	D03_24974968	24974968	A	G	3.51877e-09
	FD	D03	D03_25172608	25172608	A	T	1.40788e-08
	FD	D03	D03_25175504	25175504	T	A	2.95431e-08
	FD	D03	D03_25180213	25180213	T	C	1.89394e-08
	FD	D03	D03_25295115	25295115	A	G	3.57813e-07
	FD	D03	D03_25390169	25390169	T	C	2.26097e-07
	FD	D03	D03_25779577	25779577	C	T	2.83065e-08
	FD	D03	D03_25826514	25826514	T	C	1.62145e-07
	FD	D03	D03_25913701	25913701	C	T	2.49953e-08
	FD	D03	D03_25990461	25990461	A	G	2.12641e-07
	FD	D03	D03_26045000	26045000	A	G	5.47315e-09
	FD	D03	D03_26074803	26074803	C	A	2.58803e-08
	FD	D03	D03_26185194	26185194	T	C	3.54038e-07
	FD	D03	D03_26719099	26719099	A	G	2.28529e-10
	FD	D03	D03_26881136	26881136	G	T	1.0362e-07
	FD	D03	D03_26883673	26883673	A	G	5.39837e-08
	FD	D03	D03_26893615	26893615	A	G	6.17432e-08
	FD	D03	D03_26942729	26942729	T	C	2.34869e-07
	FD	D03	D03_26946626	26946626	T	A	1.30686e-07
	FD	D03	D03_27112709	27112709	A	C	1.40247e-08
	FD	D03	D03_27286023	27286023	T	C	9.31893e-09
	FD	D03	D03_27385938	27385938	T	G	3.56574e-08
	FD	D03	D03_27512862	27512862	A	C	3.44875e-08
	FD	D03	D03_27598866	27598866	T	G	1.60191e-08
	FD	D03	D03_27761463	27761463	T	C	5.51483e-07
	FD	D03	D03_27795629	27795629	T	G	3.5201e-08
	FD	D03	D03_27949313	27949313	T	C	8.29544e-07
	FD	D03	D03_27983634	27983634	A	G	1.70905e-07
	FD	D03	D03_28112070	28112070	C	T	1.74644e-08
	FD	D03	D03_28233896	28233896	T	C	1.98198e-07
	FD	D03	D03_28264676	28264676	A	G	8.42154e-08
	FD	D03	D03_28264739	28264739	A	G	1.56272e-07
	FD	D03	D03_28296945	28296945	T	G	4.01969e-08
	FD	D03	D03_28388094	28388094	C	A	2.60698e-08
	FD	D03	D03_28447552	28447552	T	C	3.00876e-07
	FD	D03	D03_28483216	28483216	T	C	3.13144e-08
	FD	D03	D03_28600605	28600605	A	G	3.21999e-08
	FD	D03	D03_28718239	28718239	T	C	2.41258e-09
	FD	D03	D03_28837284	28837284	A	G	1.16259e-08
	FD	D03	D03_28891221	28891221	T	C	1.08004e-07
	FD	D03	D03_28947740	28947740	A	G	8.31527e-09
	FD	D03	D03_28963368	28963368	T	A	3.43269e-08
	FD	D03	D03_28983665	28983665	A	G	7.642e-07
	FD	D03	D03_29075376	29075376	A	G	3.17733e-08
	FD	D03	D03_29135681	29135681	A	G	7.10817e-07
	FD	D03	D03_29198579	29198579	A	C	1.96753e-07
	FD	D03	D03_29212298	29212298	C	G	3.25543e-07
	FD	D03	D03_29345291	29345291	A	G	3.85135e-08
	FD	D03	D03_29887084	29887084	A	G	1.05251e-07
	FD	D03	D03_29961165	29961165	C	A	1.08397e-08
	FD	D03	D03_29961777	29961777	T	G	7.74458e-09
	FD	D03	D03_29972984	29972984	C	T	3.28917e-08
	FD	D03	D03_29994594	29994594	A	G	2.33186e-08
	FD	D03	D03_30049784	30049784	A	G	1.65827e-08
	FD	D03	D03_30314810	30314810	A	C	1.42801e-08
	FD	D03	D03_30397004	30397004	A	G	2.22189e-08
	FD	D03	D03_30586238	30586238	T	C	1.03212e-08
	FD	D03	D03_30594966	30594966	T	C	3.7223e-07
	FD	D03	D03_30764477	30764477	C	G	4.58773e-08
	FD	D03	D03_30930568	30930568	C	T	3.63499e-08
	FD	D03	D03_31003637	31003637	T	C	3.46087e-08
	FD	D03	D03_31414516	31414516	T	C	8.95807e-07
	FD	D03	D03_31600541	31600541	C	A	4.36452e-07
	FD	D03	D03_31829672	31829672	T	C	5.71939e-07
	FD	D03	D03_31862719	31862719	A	G	8.78178e-07
	FD	D03	D03_31986933	31986933	A	C	2.64273e-08
	FD	D03	D03_32102802	32102802	G	A	1.02162e-09
	FD	D03	D03_32103904	32103904	C	T	1.51393e-09
	FD	D03	D03_32104196	32104196	A	T	2.34609e-07
	FD	D03	D03_32104312	32104312	T	C	1.02615e-09
	FD	D03	D03_32104378	32104378	C	A	1.74164e-07
	FD	D03	D03_32104902	32104902	C	G	2.28455e-09
	FD	D03	D03_32108981	32108981	G	T	2.41346e-10
	FD	D03	D03_32109172	32109172	G	T	1.73992e-07
	FD	D03	D03_32117197	32117197	C	T	4.89603e-09
	FD	D03	D03_32117779	32117779	C	T	6.46046e-10
	FD	D03	D03_32117923	32117923	C	T	4.66821e-09
	FD	D03	D03_32118131	32118131	C	T	7.97886e-10
	FD	D03	D03_32118140	32118140	T	G	8.58e-10
	FD	D03	D03_32118237	32118237	C	T	1.91013e-09
	FD	D03	D03_32122807	32122807	G	A	1.15536e-09
	FD	D03	D03_32124714	32124714	A	G	4.16834e-07
	FD	D03	D03_32124775	32124775	C	T	6.79424e-11
	FD	D03	D03_32124785	32124785	C	T	6.73344e-11
	FD	D03	D03_32125779	32125779	A	C	1.95715e-09
	FD	D03	D03_32126409	32126409	A	C	7.91398e-10
	FD	D03	D03_32128364	32128364	G	A	8.34791e-10
	FD	D03	D03_32128518	32128518	A	G	1.86415e-09
	FD	D03	D03_32129777	32129777	C	T	9.70586e-10
	FD	D03	D03_32129826	32129826	G	A	1.33965e-10
	FD	D03	D03_32130143	32130143	G	A	5.32197e-10
	FD	D03	D03_32130596	32130596	A	C	5.00297e-08
	FD	D03	D03_32131495	32131495	C	T	9.81625e-10
	FD	D03	D03_32131653	32131653	C	A	3.97827e-10
	FD	D03	D03_32131739	32131739	T	C	2.01443e-09
	FD	D03	D03_32133086	32133086	A	C	1.30083e-09
	FD	D03	D03_32133196	32133196	C	A	1.57322e-09
	FD	D03	D03_32133993	32133993	T	C	2.24135e-09
	FD	D03	D03_32134697	32134697	C	T	9.44648e-10
	FD	D03	D03_32134989	32134989	C	A	1.94302e-09
	FD	D03	D03_32136602	32136602	T	C	2.03086e-10
	FD	D03	D03_32136658	32136658	A	T	2.5119e-10
	FD	D03	D03_32136701	32136701	A	G	2.68967e-08
	FD	D03	D03_32136750	32136750	G	A	3.08135e-08
	FD	D03	D03_32136773	32136773	T	C	2.40538e-08
	FD	D03	D03_32138698	32138698	G	T	1.27207e-09
	FD	D03	D03_32138841	32138841	A	G	9.37345e-09
	FD	D03	D03_32138930	32138930	A	C	5.99748e-10
	FD	D03	D03_32138975	32138975	C	T	2.20657e-09
	FD	D03	D03_32139108	32139108	T	C	1.05965e-08
	FD	D03	D03_32141503	32141503	T	A	1.11144e-09
	FD	D03	D03_32141686	32141686	C	T	6.36763e-11
	FD	D03	D03_32141830	32141830	A	G	1.08416e-08
	FD	D03	D03_32141858	32141858	A	G	2.98135e-08
	FD	D03	D03_32142035	32142035	G	A	1.74063e-09
	FD	D03	D03_32142232	32142232	C	T	1.59484e-07
	FD	D03	D03_32142663	32142663	A	G	1.95874e-12
	FD	D03	D03_32144915	32144915	A	C	6.91111e-07
	FD	D03	D03_32145238	32145238	C	T	4.00744e-10
	FD	D03	D03_32145239	32145239	C	T	4.47338e-10
	FD	D03	D03_32145270	32145270	A	C	2.67323e-10
	FD	D03	D03_32145447	32145447	T	C	1.32999e-09
	FD	D03	D03_32145526	32145526	G	A	1.15747e-09
	FD	D03	D03_32145530	32145530	C	T	1.13201e-09
	FD	D03	D03_32146073	32146073	C	T	5.6422e-09
	FD	D03	D03_32146763	32146763	C	T	6.40538e-08
	FD	D03	D03_32146941	32146941	C	T	1.79231e-09
	FD	D03	D03_32148031	32148031	G	A	4.86151e-10
	FD	D03	D03_32148049	32148049	A	G	2.94319e-10
	FD	D03	D03_32148321	32148321	C	T	9.9784e-09
	FD	D03	D03_32148484	32148484	T	C	1.67802e-09
	FD	D03	D03_32148779	32148779	A	G	3.15801e-10
	FD	D03	D03_32148837	32148837	G	A	1.71162e-09
	FD	D03	D03_32148940	32148940	T	C	1.89628e-09
	FD	D03	D03_32149055	32149055	T	A	1.04205e-09
	FD	D03	D03_32150285	32150285	G	A	1.12139e-08
	FD	D03	D03_32150394	32150394	T	C	2.6303e-08
	FD	D03	D03_32150545	32150545	A	G	2.51643e-07
	FD	D03	D03_32150703	32150703	C	T	1.63449e-09
	FD	D03	D03_32163352	32163352	G	A	5.44967e-10
	FD	D03	D03_32163712	32163712	C	T	4.62412e-11
	FD	D03	D03_32163803	32163803	C	T	2.4091e-09
	FD	D03	D03_32163918	32163918	C	A	3.44089e-09
	FD	D03	D03_32164093	32164093	G	C	1.05146e-07
	FD	D03	D03_32164129	32164129	A	G	7.0001e-09
	FD	D03	D03_32164440	32164440	C	T	8.69608e-09
	FD	D03	D03_32165017	32165017	A	T	2.67254e-10
	FD	D03	D03_32166442	32166442	C	T	2.77615e-07
	FD	D03	D03_32166847	32166847	T	C	3.17607e-08
	FD	D03	D03_32166903	32166903	A	T	2.17661e-08
	FD	D03	D03_32167241	32167241	G	A	8.09016e-10
	FD	D03	D03_32169042	32169042	C	T	2.48486e-09
	FD	D03	D03_32169077	32169077	C	G	3.08246e-09
	FD	D03	D03_32169120	32169120	T	C	7.47062e-10
	FD	D03	D03_32169157	32169157	C	T	7.33299e-10
	FD	D03	D03_32169256	32169256	T	A	4.76903e-08
	FD	D03	D03_32169514	32169514	C	G	1.16908e-09
	FD	D03	D03_32169524	32169524	G	A	2.04909e-09
	FD	D03	D03_32169723	32169723	C	T	1.18111e-09
	FD	D03	D03_32169778	32169778	T	A	2.28248e-10
	FD	D03	D03_32169877	32169877	C	T	4.76107e-09
	FD	D03	D03_32173952	32173952	T	A	1.87491e-09
	FD	D03	D03_32174149	32174149	G	T	6.17216e-09
	FD	D03	D03_32174320	32174320	G	A	2.209e-10
	FD	D03	D03_32174323	32174323	T	C	2.209e-10
	FD	D03	D03_32174424	32174424	A	C	4.68396e-10
	FD	D03	D03_32175007	32175007	G	A	4.03962e-08
	FD	D03	D03_32175077	32175077	C	T	1.62884e-08
	FD	D03	D03_32175100	32175100	C	T	1.82747e-08
	FD	D03	D03_32176844	32176844	C	T	3.20708e-09
	FD	D03	D03_32176853	32176853	A	G	2.72391e-09
	FD	D03	D03_32177005	32177005	G	T	7.69377e-10
	FD	D03	D03_32177916	32177916	C	T	3.14287e-10
	FD	D03	D03_32178132	32178132	A	G	6.72222e-10
	FD	D03	D03_32178157	32178157	C	T	6.02301e-10
	FD	D03	D03_32178179	32178179	G	A	6.56857e-10
	FD	D03	D03_32178384	32178384	C	T	4.05864e-10
	FD	D03	D03_32178529	32178529	G	A	9.91159e-10
	FD	D03	D03_32178551	32178551	G	T	3.53564e-10
	FD	D03	D03_32178562	32178562	G	A	2.60424e-09
	FD	D03	D03_32178597	32178597	A	C	1.24586e-10
	FD	D03	D03_32178623	32178623	C	T	4.11325e-10
	FD	D03	D03_32178740	32178740	A	G	5.19297e-08
	FD	D03	D03_32178782	32178782	C	T	2.67473e-10
	FD	D03	D03_32179000	32179000	G	A	1.22905e-08
	FD	D03	D03_32179020	32179020	C	T	1.82923e-09
	FD	D03	D03_32179082	32179082	G	A	1.4781e-09
	FD	D03	D03_32179092	32179092	C	T	1.60124e-09
	FD	D03	D03_32179168	32179168	G	A	3.73378e-10
	FD	D03	D03_32179181	32179181	G	T	4.00958e-10
	FD	D03	D03_32179460	32179460	C	T	2.73809e-10
	FD	D03	D03_32179471	32179471	A	G	2.5055e-10
	FD	D03	D03_32179540	32179540	G	A	1.60274e-09
	FD	D03	D03_32179682	32179682	A	G	1.99328e-09
	FD	D03	D03_32184057	32184057	T	G	7.62915e-08
	FD	D03	D03_32184317	32184317	A	C	5.26259e-08
	FD	D03	D03_32184351	32184351	G	A	1.84057e-09
	FD	D03	D03_32184474	32184474	A	G	1.51411e-09
	FD	D03	D03_32184761	32184761	C	T	8.38586e-12
	FD	D03	D03_32190534	32190534	G	A	1.50757e-09
	FD	D03	D03_32191153	32191153	T	G	2.94489e-08
	FD	D03	D03_32191569	32191569	A	G	1.62496e-08
	FD	D03	D03_32193825	32193825	G	A	9.92678e-09
	FD	D03	D03_32194060	32194060	G	T	3.0197e-08
	FD	D03	D03_32196278	32196278	T	A	1.39222e-09
	FD	D03	D03_32196312	32196312	A	G	2.83025e-08
	FD	D03	D03_32196342	32196342	C	T	9.42269e-10
	FD	D03	D03_32196458	32196458	G	A	1.25184e-09
	FD	D03	D03_32196494	32196494	T	G	6.54347e-10
	FD	D03	D03_32196786	32196786	G	A	9.25464e-10
	FD	D03	D03_32196936	32196936	T	C	1.26128e-08
	FD	D03	D03_32197051	32197051	G	A	8.31885e-10
	FD	D03	D03_32197139	32197139	C	T	2.43583e-09
	FD	D03	D03_32197275	32197275	T	C	1.85858e-09
	FD	D03	D03_32197372	32197372	C	G	1.02684e-09
	FD	D03	D03_32197421	32197421	G	T	3.22105e-10
	FD	D03	D03_32198071	32198071	A	G	1.41864e-08
	FD	D03	D03_32198207	32198207	T	C	1.52287e-08
	FD	D03	D03_32198679	32198679	G	A	3.44535e-09
	FD	D03	D03_32198710	32198710	C	T	1.87453e-09
	FD	D03	D03_32198713	32198713	T	C	1.97868e-09
	FD	D03	D03_32199414	32199414	G	A	2.8916e-08
	FD	D03	D03_32199513	32199513	G	A	7.51879e-10
	FD	D03	D03_32199737	32199737	C	G	9.45519e-09
	FD	D03	D03_32199932	32199932	A	C	6.81518e-07
	FD	D03	D03_32199933	32199933	C	A	8.03843e-07
	FD	D03	D03_32200012	32200012	C	G	7.08778e-11
	FD	D03	D03_32200147	32200147	T	C	5.93344e-10
	FD	D03	D03_32200163	32200163	T	C	4.00206e-10
	FD	D03	D03_32200362	32200362	G	C	2.6089e-10
	FD	D03	D03_32200364	32200364	T	A	2.40482e-10
	FD	D03	D03_32200414	32200414	A	G	1.02515e-08
	FD	D03	D03_32200432	32200432	A	T	1.0364e-08
	FD	D03	D03_32200536	32200536	T	C	1.20114e-08
	FD	D03	D03_32200718	32200718	T	C	2.79371e-10
	FD	D03	D03_32200970	32200970	T	C	8.07446e-08
	FD	D03	D03_32201142	32201142	C	T	5.90598e-09
	FD	D03	D03_32201283	32201283	G	A	9.10524e-09
	FD	D03	D03_32201343	32201343	A	G	6.50637e-10
	FD	D03	D03_32201355	32201355	A	G	7.3267e-10
	FD	D03	D03_32201481	32201481	C	A	4.61637e-08
	FD	D03	D03_32201583	32201583	G	A	1.25422e-09
	FD	D03	D03_32201593	32201593	T	C	1.40301e-09
	FD	D03	D03_32201662	32201662	A	G	2.93438e-09
	FD	D03	D03_32202129	32202129	G	C	2.28314e-10
	FD	D03	D03_32202138	32202138	A	C	1.91055e-10
	FD	D03	D03_32202181	32202181	T	C	1.79827e-10
	FD	D03	D03_32202253	32202253	C	A	8.53333e-10
	FD	D03	D03_32202337	32202337	G	A	2.83056e-10
	FD	D03	D03_32202349	32202349	G	A	3.65356e-11
	FD	D03	D03_32202386	32202386	A	G	1.16879e-10
	FD	D03	D03_32202878	32202878	T	A	1.16542e-08
	FD	D03	D03_32202880	32202880	C	T	1.0522e-08
	FD	D03	D03_32202896	32202896	G	A	5.40926e-08
	FD	D03	D03_32202908	32202908	A	G	4.89103e-08
	FD	D03	D03_32208096	32208096	A	T	1.35941e-09
	FD	D03	D03_32208329	32208329	C	T	1.83923e-09
	FD	D03	D03_32210287	32210287	C	T	8.84183e-10
	FD	D03	D03_32210346	32210346	C	T	1.66381e-09
	FD	D03	D03_32211043	32211043	T	C	3.16506e-07
	FD	D03	D03_32211708	32211708	T	C	9.99281e-10
	FD	D03	D03_32211833	32211833	A	G	9.77443e-09
	FD	D03	D03_32211892	32211892	G	T	9.38774e-09
	FD	D03	D03_32212043	32212043	G	A	2.63966e-07
	FD	D03	D03_32212279	32212279	G	A	1.20193e-07
	FD	D03	D03_32212428	32212428	T	C	4.69102e-10
	FD	D03	D03_32212487	32212487	G	A	1.00347e-08
	FD	D03	D03_32212605	32212605	G	A	1.92221e-09
	FD	D03	D03_32212750	32212750	T	C	1.43444e-10
	FD	D03	D03_32212861	32212861	G	A	2.38626e-09
	FD	D03	D03_32213063	32213063	A	C	1.58158e-09
	FD	D03	D03_32213209	32213209	A	G	8.67713e-10
	FD	D03	D03_32213277	32213277	G	A	1.31224e-10
	FD	D03	D03_32213342	32213342	T	C	7.85915e-10
	FD	D03	D03_32213498	32213498	G	C	1.46516e-08
	FD	D03	D03_32213586	32213586	T	A	4.50953e-10
	FD	D03	D03_32213628	32213628	A	G	4.32953e-10
	FD	D03	D03_32213774	32213774	A	C	3.2651e-11
	FD	D03	D03_32213870	32213870	A	G	6.32059e-09
	FD	D03	D03_32213904	32213904	G	A	2.62224e-08
	FD	D03	D03_32213910	32213910	A	G	2.61581e-08
	FD	D03	D03_32214769	32214769	C	T	1.14079e-09
	FD	D03	D03_32214958	32214958	T	A	3.02272e-10
	FD	D03	D03_32215179	32215179	A	C	8.61475e-09
	FD	D03	D03_32215180	32215180	C	T	7.93084e-09
	FD	D03	D03_32215931	32215931	A	T	4.3465e-09
	FD	D03	D03_32216116	32216116	G	A	1.17452e-08
	FD	D03	D03_32220875	32220875	C	T	2.77954e-08
	FD	D03	D03_32221170	32221170	T	C	1.24203e-09
	FD	D03	D03_32221177	32221177	C	G	1.03656e-08
	FD	D03	D03_32221255	32221255	A	C	5.63371e-08
	FD	D03	D03_32222097	32222097	A	G	1.78245e-08
	FD	D03	D03_32223837	32223837	G	A	2.37111e-11
	FD	D03	D03_32223979	32223979	G	C	9.36263e-10
	FD	D03	D03_32224181	32224181	C	T	9.10866e-09
	FD	D03	D03_32224221	32224221	T	C	7.19457e-09
	FD	D03	D03_32224228	32224228	A	G	7.04217e-09
	FD	D03	D03_32224261	32224261	A	C	7.72783e-09
	FD	D03	D03_32224278	32224278	G	A	7.71414e-09
	FD	D03	D03_32224561	32224561	C	T	6.09801e-08
	FD	D03	D03_32224667	32224667	T	A	4.03508e-07
	FD	D03	D03_32224751	32224751	G	C	6.42423e-08
	FD	D03	D03_32224806	32224806	A	G	1.51104e-08
	FD	D03	D03_32225079	32225079	G	C	1.72418e-09
	FD	D03	D03_32225162	32225162	A	T	2.96667e-10
	FD	D03	D03_32225173	32225173	T	C	3.73701e-10
	FD	D03	D03_32225217	32225217	G	T	1.32878e-08
	FD	D03	D03_32225245	32225245	G	A	2.04232e-09
	FD	D03	D03_32225261	32225261	C	T	2.66574e-09
	FD	D03	D03_32225277	32225277	T	A	2.63433e-09
	FD	D03	D03_32225407	32225407	G	A	2.21281e-09
	FD	D03	D03_32225422	32225422	G	A	2.44013e-09
	FD	D03	D03_32225478	32225478	A	G	1.596e-09
	FD	D03	D03_32225575	32225575	T	C	1.763e-09
	FD	D03	D03_32225604	32225604	T	C	1.02409e-08
	FD	D03	D03_32225776	32225776	T	A	5.11745e-10
	FD	D03	D03_32225812	32225812	T	C	5.48502e-10
	FD	D03	D03_32225907	32225907	G	A	1.53078e-07
	FD	D03	D03_32226003	32226003	C	T	7.71182e-09
	FD	D03	D03_32226095	32226095	C	A	7.86414e-09
	FD	D03	D03_32226299	32226299	G	A	2.73431e-09
	FD	D03	D03_32226339	32226339	C	T	4.33065e-10
	FD	D03	D03_32226356	32226356	A	G	4.72187e-10
	FD	D03	D03_32226459	32226459	G	A	1.46933e-08
	FD	D03	D03_32226574	32226574	G	T	1.0992e-09
	FD	D03	D03_32226631	32226631	T	C	1.8392e-09
	FD	D03	D03_32226673	32226673	G	A	2.01508e-08
	FD	D03	D03_32226979	32226979	A	G	1.74562e-08
	FD	D03	D03_32227010	32227010	C	T	2.01651e-08
	FD	D03	D03_32227041	32227041	A	C	1.70947e-08
	FD	D03	D03_32227260	32227260	A	G	3.93537e-10
	FD	D03	D03_32227299	32227299	A	G	3.93291e-10
	FD	D03	D03_32227307	32227307	T	C	2.52096e-10
	FD	D03	D03_32227322	32227322	G	A	2.48846e-10
	FD	D03	D03_32227340	32227340	A	G	2.37971e-10
	FD	D03	D03_32227386	32227386	C	T	6.86097e-10
	FD	D03	D03_32227464	32227464	T	C	2.31161e-10
	FD	D03	D03_32227602	32227602	T	C	1.98164e-09
	FD	D03	D03_32227656	32227656	G	A	1.57748e-09
	FD	D03	D03_32227945	32227945	G	A	1.7044e-10
	FD	D03	D03_32228263	32228263	C	T	6.57175e-09
	FD	D03	D03_32228964	32228964	T	G	4.92492e-08
	FD	D03	D03_32229045	32229045	A	G	1.30644e-10
	FD	D03	D03_32229101	32229101	C	T	9.2254e-08
	FD	D03	D03_32230515	32230515	T	C	3.57693e-10
	FD	D03	D03_32230787	32230787	A	G	1.84858e-09
	FD	D03	D03_32230792	32230792	A	G	1.81886e-09
	FD	D03	D03_32231211	32231211	A	G	1.12477e-08
	FD	D03	D03_32231294	32231294	G	A	4.66089e-09
	FD	D03	D03_32231888	32231888	G	C	7.61944e-10
	FD	D03	D03_32233003	32233003	G	A	1.16429e-09
	FD	D03	D03_32233064	32233064	C	T	4.25492e-07
	FD	D03	D03_32233096	32233096	A	G	2.31725e-09
	FD	D03	D03_32233143	32233143	G	T	2.23319e-09
	FD	D03	D03_32233229	32233229	T	A	7.67295e-08
	FD	D03	D03_32234012	32234012	C	A	6.03652e-09
	FD	D03	D03_32234345	32234345	A	C	1.72669e-08
	FD	D03	D03_32234412	32234412	C	A	2.14487e-08
	FD	D03	D03_32234431	32234431	C	T	5.32527e-10
	FD	D03	D03_32234715	32234715	A	C	1.03069e-09
	FD	D03	D03_32234784	32234784	C	T	1.86417e-09
	FD	D03	D03_32234857	32234857	C	A	7.77916e-09
	FD	D03	D03_32234962	32234962	G	A	5.90578e-09
	FD	D03	D03_32234987	32234987	A	C	7.30752e-09
	FD	D03	D03_32234999	32234999	C	T	6.8917e-09
	FD	D03	D03_32235009	32235009	T	A	8.26903e-09
	FD	D03	D03_32235078	32235078	G	A	9.71854e-09
	FD	D03	D03_32235752	32235752	C	T	9.84096e-09
	FD	D03	D03_32235962	32235962	G	T	8.76212e-10
	FD	D03	D03_32235995	32235995	C	T	1.07137e-09
	FD	D03	D03_32236150	32236150	T	C	1.19653e-07
	FD	D03	D03_32236174	32236174	G	A	1.56461e-09
	FD	D03	D03_32236331	32236331	C	T	1.00409e-09
	FD	D03	D03_32236345	32236345	T	C	4.59655e-09
	FD	D03	D03_32236538	32236538	G	A	4.48373e-10
	FD	D03	D03_32236606	32236606	A	G	6.90425e-09
	FD	D03	D03_32236811	32236811	C	T	1.10236e-09
	FD	D03	D03_32237030	32237030	A	G	9.44333e-09
	FD	D03	D03_32237178	32237178	G	A	6.31044e-08
	FD	D03	D03_32237259	32237259	C	T	2.73118e-10
	FD	D03	D03_32238138	32238138	G	C	4.40356e-09
	FD	D03	D03_32238145	32238145	C	T	4.40356e-09
	FD	D03	D03_32238281	32238281	T	G	4.01276e-11
	FD	D03	D03_32238380	32238380	A	C	3.34642e-09
	FD	D03	D03_32239592	32239592	A	G	4.04232e-07
	FD	D03	D03_32240290	32240290	T	G	1.14401e-08
	FD	D03	D03_32240443	32240443	T	C	5.5551e-10
	FD	D03	D03_32240897	32240897	T	G	3.99253e-10
	FD	D03	D03_32241038	32241038	C	A	4.55831e-10
	FD	D03	D03_32241063	32241063	G	A	2.62981e-09
	FD	D03	D03_32241081	32241081	C	T	3.46792e-10
	FD	D03	D03_32241138	32241138	G	A	9.26834e-10
	FD	D03	D03_32242000	32242000	C	G	5.78735e-10
	FD	D03	D03_32242945	32242945	T	C	4.50495e-10
	FD	D03	D03_32243024	32243024	A	G	8.81416e-10
	FD	D03	D03_32243026	32243026	C	T	8.95464e-10
	FD	D03	D03_32244084	32244084	G	T	9.73974e-11
	FD	D03	D03_32244198	32244198	G	T	4.30886e-08
	FD	D03	D03_32244399	32244399	A	G	1.02225e-09
	FD	D03	D03_32244442	32244442	G	A	8.29308e-10
	FD	D03	D03_32244476	32244476	G	C	9.03466e-10
	FD	D03	D03_32244792	32244792	A	G	6.63427e-08
	FD	D03	D03_32244837	32244837	C	T	1.08844e-08
	FD	D03	D03_32244966	32244966	T	A	1.40067e-08
	FD	D03	D03_32245829	32245829	C	A	9.10391e-09
	FD	D03	D03_32245958	32245958	C	T	1.07423e-08
	FD	D03	D03_32245995	32245995	G	A	8.01125e-09
	FD	D03	D03_32246157	32246157	T	A	1.66338e-09
	FD	D03	D03_32246348	32246348	A	G	1.4918e-09
	FD	D03	D03_32246460	32246460	G	A	3.43263e-10
	FD	D03	D03_32246487	32246487	C	T	5.15203e-09
	FD	D03	D03_32246627	32246627	T	C	2.4847e-09
	FD	D03	D03_32246678	32246678	T	C	1.13858e-09
	FD	D03	D03_32246700	32246700	G	A	6.83116e-09
	FD	D03	D03_32246723	32246723	G	A	1.24235e-09
	FD	D03	D03_32247031	32247031	C	T	5.23118e-10
	FD	D03	D03_32247155	32247155	G	A	3.08354e-10
	FD	D03	D03_32247392	32247392	G	A	2.26183e-09
	FD	D03	D03_32247410	32247410	G	A	1.50375e-09
	FD	D03	D03_32247437	32247437	G	C	1.20317e-09
	FD	D03	D03_32247543	32247543	G	C	4.01787e-10
	FD	D03	D03_32247675	32247675	A	G	2.83591e-09
	FD	D03	D03_32248052	32248052	A	G	3.31877e-10
	FD	D03	D03_32248091	32248091	G	A	2.74143e-10
	FD	D03	D03_32248111	32248111	G	A	2.98124e-10
	FD	D03	D03_32248184	32248184	A	T	2.16561e-10
	FD	D03	D03_32248408	32248408	A	C	1.25892e-09
	FD	D03	D03_32248470	32248470	G	A	1.50875e-09
	FD	D03	D03_32248471	32248471	G	A	1.50875e-09
	FD	D03	D03_32248683	32248683	G	T	2.05226e-09
	FD	D03	D03_32248783	32248783	C	T	2.26337e-10
	FD	D03	D03_32248911	32248911	C	T	1.1676e-08
	FD	D03	D03_32250414	32250414	G	A	5.30563e-11
	FD	D03	D03_32250873	32250873	G	T	2.85253e-09
	FD	D03	D03_32251022	32251022	T	C	1.08733e-08
	FD	D03	D03_32251130	32251130	A	G	1.97866e-08
	FD	D03	D03_32251212	32251212	G	A	5.66936e-10
	FD	D03	D03_32251957	32251957	T	C	9.56953e-09
	FD	D03	D03_32252030	32252030	G	A	3.53199e-10
	FD	D03	D03_32254178	32254178	G	T	2.84426e-09
	FD	D03	D03_32254785	32254785	G	A	2.21399e-07
	FD	D03	D03_32255194	32255194	C	T	3.96425e-10
	FD	D03	D03_32255202	32255202	G	A	3.96425e-10
	FD	D03	D03_32256508	32256508	T	C	2.16269e-10
	FD	D03	D03_32256604	32256604	C	T	1.28109e-07
	FD	D03	D03_32256797	32256797	A	G	1.06048e-08
	FD	D03	D03_32256858	32256858	C	T	8.03236e-08
	FD	D03	D03_32257205	32257205	A	G	4.2376e-10
	FD	D03	D03_32257249	32257249	T	C	1.30676e-08
	FD	D03	D03_32257259	32257259	C	T	1.17199e-09
	FD	D03	D03_32257605	32257605	G	A	7.00864e-10
	FD	D03	D03_32257782	32257782	G	A	1.99808e-09
	FD	D03	D03_32258427	32258427	G	T	1.51357e-09
	FD	D03	D03_32258456	32258456	A	T	1.94279e-09
	FD	D03	D03_32258509	32258509	A	G	1.02263e-08
	FD	D03	D03_32258633	32258633	C	T	2.43351e-09
	FD	D03	D03_32258680	32258680	G	A	7.75192e-09
	FD	D03	D03_32258851	32258851	C	T	4.48114e-09
	FD	D03	D03_32258973	32258973	G	C	1.57057e-07
	FD	D03	D03_32259067	32259067	A	G	7.7956e-09
	FD	D03	D03_32259085	32259085	C	G	3.99934e-08
	FD	D03	D03_32259235	32259235	T	C	1.02406e-09
	FD	D03	D03_32259524	32259524	G	A	8.82417e-07
	FD	D03	D03_32259578	32259578	T	C	9.27216e-08
	FD	D03	D03_32259622	32259622	G	T	2.39615e-09
	FD	D03	D03_32260282	32260282	C	A	3.14031e-09
	FD	D03	D03_32260315	32260315	C	A	1.52256e-09
	FD	D03	D03_32260371	32260371	A	G	9.60289e-09
	FD	D03	D03_32260597	32260597	A	G	1.65519e-08
	FD	D03	D03_32260688	32260688	C	T	2.40828e-07
	FD	D03	D03_32260775	32260775	G	T	7.306e-09
	FD	D03	D03_32260803	32260803	C	G	1.61191e-09
	FD	D03	D03_32260960	32260960	G	A	1.51025e-09
	FD	D03	D03_32261178	32261178	A	T	2.00001e-10
	FD	D03	D03_32261180	32261180	T	C	2.30977e-10
	FD	D03	D03_32261230	32261230	A	C	2.42698e-09
	FD	D03	D03_32261420	32261420	G	A	5.6335e-10
	FD	D03	D03_32262168	32262168	G	C	2.96557e-10
	FD	D03	D03_32262519	32262519	C	A	1.58578e-09
	FD	D03	D03_32262520	32262520	C	T	1.58578e-09
	FD	D03	D03_32262836	32262836	C	T	7.90814e-10
	FD	D03	D03_32263115	32263115	T	G	1.56033e-08
	FD	D03	D03_32263133	32263133	C	T	1.5837e-08
	FD	D03	D03_32263135	32263135	T	C	1.5837e-08
	FD	D03	D03_32263299	32263299	C	A	1.35755e-09
	FD	D03	D03_32263339	32263339	T	G	3.58536e-10
	FD	D03	D03_32263354	32263354	A	G	3.75473e-10
	FD	D03	D03_32264275	32264275	T	A	1.12852e-08
	FD	D03	D03_32264467	32264467	T	A	8.25501e-08
	FD	D03	D03_32264725	32264725	A	G	1.13872e-07
	FD	D03	D03_32264848	32264848	A	G	1.85901e-08
	FD	D03	D03_32265207	32265207	G	C	2.56915e-08
	FD	D03	D03_32265352	32265352	A	G	2.70568e-10
	FD	D03	D03_32266094	32266094	A	G	1.45308e-10
	FD	D03	D03_32266153	32266153	T	C	4.3759e-10
	FD	D03	D03_32266166	32266166	C	T	4.3104e-10
	FD	D03	D03_32266233	32266233	T	C	4.08527e-10
	FD	D03	D03_32266891	32266891	A	G	1.43275e-08
	FD	D03	D03_32266901	32266901	C	T	1.69929e-08
	FD	D03	D03_32267167	32267167	A	G	1.30687e-10
	FD	D03	D03_32267394	32267394	G	A	9.29144e-11
	FD	D03	D03_32267481	32267481	G	A	9.16629e-09
	FD	D03	D03_32267559	32267559	G	A	1.02662e-09
	FD	D03	D03_32268043	32268043	C	T	3.77437e-10
	FD	D03	D03_32268044	32268044	G	A	3.18256e-10
	FD	D03	D03_32268190	32268190	T	C	2.36789e-09
	FD	D03	D03_32270019	32270019	G	A	3.98677e-09
	FD	D03	D03_32270276	32270276	A	G	1.81373e-10
	FD	D03	D03_32270849	32270849	G	T	1.831e-10
	FD	D03	D03_32273965	32273965	G	A	2.08963e-09
	FD	D03	D03_32274097	32274097	A	G	6.38124e-09
	FD	D03	D03_32275181	32275181	T	C	3.19838e-08
	FD	D03	D03_32280099	32280099	T	C	5.18932e-08
	FD	D03	D03_32280190	32280190	G	A	5.75925e-09
	FD	D03	D03_32280191	32280191	G	T	5.75925e-09
	FD	D03	D03_32280220	32280220	G	A	2.46255e-08
	FD	D03	D03_32280231	32280231	G	T	6.51652e-09
	FD	D03	D03_32280240	32280240	G	A	6.67686e-09
	FD	D03	D03_32280329	32280329	G	T	3.97734e-09
	FD	D03	D03_32280342	32280342	T	C	6.36528e-09
	FD	D03	D03_32280370	32280370	A	G	2.14626e-09
	FD	D03	D03_32280387	32280387	C	T	1.24886e-09
	FD	D03	D03_32280467	32280467	T	C	1.46443e-09
	FD	D03	D03_32280491	32280491	G	A	1.65788e-09
	FD	D03	D03_32280640	32280640	T	G	4.66885e-09
	FD	D03	D03_32280759	32280759	C	T	5.36529e-09
	FD	D03	D03_32280799	32280799	T	G	4.24067e-09
	FD	D03	D03_32281234	32281234	G	A	4.68502e-10
	FD	D03	D03_32281260	32281260	C	T	5.24345e-10
	FD	D03	D03_32281528	32281528	C	T	1.2521e-08
	FD	D03	D03_32281544	32281544	G	T	1.1171e-08
	FD	D03	D03_32281717	32281717	T	C	1.53976e-07
	FD	D03	D03_32281966	32281966	G	T	4.60615e-08
	FD	D03	D03_32281968	32281968	C	T	4.60615e-08
	FD	D03	D03_32281999	32281999	C	T	8.82993e-09
	FD	D03	D03_32282076	32282076	A	G	1.12576e-08
	FD	D03	D03_32282487	32282487	A	T	1.81628e-09
	FD	D03	D03_32282681	32282681	C	T	1.17955e-09
	FD	D03	D03_32283091	32283091	C	T	7.2959e-09
	FD	D03	D03_32283106	32283106	T	A	8.37425e-09
	FD	D03	D03_32283157	32283157	T	C	3.38511e-10
	FD	D03	D03_32283195	32283195	G	A	3.25238e-10
	FD	D03	D03_32283207	32283207	G	A	3.08522e-10
	FD	D03	D03_32283444	32283444	A	C	5.50031e-09
	FD	D03	D03_32283742	32283742	A	G	4.76718e-08
	FD	D03	D03_32285466	32285466	C	T	9.67674e-09
	FD	D03	D03_32285818	32285818	G	A	1.77658e-08
	FD	D03	D03_32286688	32286688	A	T	4.09686e-10
	FD	D03	D03_32287050	32287050	T	A	1.00787e-09
	FD	D03	D03_32287374	32287374	A	G	4.11714e-07
	FD	D03	D03_32287546	32287546	C	T	4.09747e-08
	FD	D03	D03_32291690	32291690	A	G	2.27607e-07
	FD	D03	D03_32291758	32291758	A	G	2.72572e-07
	FD	D03	D03_32293989	32293989	C	T	3.21872e-10
	FD	D03	D03_32294063	32294063	G	A	2.77491e-08
	FD	D03	D03_32294979	32294979	G	A	1.27242e-07
	FD	D03	D03_32295110	32295110	T	C	1.94904e-09
	FD	D03	D03_32295152	32295152	C	T	6.30626e-10
	FD	D03	D03_32295729	32295729	T	G	8.25198e-10
	FD	D03	D03_32295759	32295759	G	C	1.24838e-08
	FD	D03	D03_32295896	32295896	G	A	2.83467e-10
	FD	D03	D03_32296021	32296021	A	G	3.10491e-10
	FD	D03	D03_32296152	32296152	A	T	3.78411e-10
	FD	D03	D03_32298277	32298277	G	A	2.35595e-09
	FD	D03	D03_32303171	32303171	C	T	4.40414e-10
	FD	D03	D03_32307152	32307152	C	A	4.13939e-09
	FD	D03	D03_32307223	32307223	C	T	1.9041e-09
	FD	D03	D03_32307278	32307278	C	T	4.6201e-11
	FD	D03	D03_32310877	32310877	G	T	5.33344e-10
	FD	D03	D03_32318930	32318930	C	T	2.66884e-09
	FD	D03	D03_32318961	32318961	T	C	2.51888e-09
	FD	D03	D03_32320636	32320636	C	T	1.74807e-08
	FD	D03	D03_32320997	32320997	A	G	1.70216e-08
	FD	D03	D03_32323889	32323889	G	A	1.63801e-08
	FD	D03	D03_32323932	32323932	G	T	4.71394e-07
	FD	D03	D03_32330013	32330013	C	A	1.85021e-09
	FD	D03	D03_32330283	32330283	T	C	1.35052e-08
	FD	D03	D03_32330285	32330285	A	G	1.35052e-08
	FD	D03	D03_32331881	32331881	A	G	1.99877e-09
	FD	D03	D03_32331888	32331888	T	A	1.99877e-09
	FD	D03	D03_32332276	32332276	C	A	5.2815e-08
	FD	D03	D03_32332693	32332693	G	A	4.19903e-10
	FD	D03	D03_32332735	32332735	G	T	5.79844e-10
	FD	D03	D03_32332854	32332854	G	A	9.5269e-07
	FD	D03	D03_32333034	32333034	A	G	1.92629e-09
	FD	D03	D03_32333701	32333701	T	A	3.95375e-08
	FD	D03	D03_32333857	32333857	G	A	8.05866e-09
	FD	D03	D03_32336089	32336089	G	T	4.54981e-09
	FD	D03	D03_32337265	32337265	T	A	3.27584e-07
	FD	D03	D03_32337943	32337943	A	G	1.38618e-08
	FD	D03	D03_32338192	32338192	C	T	4.24069e-07
	FD	D03	D03_32338598	32338598	T	C	1.13954e-09
	FD	D03	D03_32338623	32338623	T	G	8.47081e-10
	FD	D03	D03_32346527	32346527	C	T	8.69215e-10
	FD	D03	D03_32346550	32346550	C	T	1.35158e-09
	FD	D03	D03_32346998	32346998	T	C	3.27123e-08
	FD	D03	D03_32347829	32347829	C	T	4.5144e-08
	FD	D03	D03_32347854	32347854	T	C	1.0977e-08
	FD	D03	D03_32347886	32347886	G	C	1.24776e-08
	FD	D03	D03_32347917	32347917	C	A	1.32173e-08
	FD	D03	D03_32348757	32348757	C	T	2.60006e-10
	FD	D03	D03_32348827	32348827	A	C	1.17742e-09
	FD	D03	D03_32353239	32353239	C	T	1.23056e-07
	FD	D03	D03_32353294	32353294	A	G	2.82633e-09
	FD	D03	D03_32353650	32353650	A	G	1.75161e-08
	FD	D03	D03_32353654	32353654	C	T	1.84591e-08
	FD	D03	D03_32353666	32353666	G	T	1.84591e-08
	FD	D03	D03_32353957	32353957	A	T	1.69667e-08
	FD	D03	D03_32354080	32354080	G	A	1.79537e-08
	FD	D03	D03_32354534	32354534	G	A	2.76191e-09
	FD	D03	D03_32357800	32357800	T	C	5.95032e-10
	FD	D03	D03_32357966	32357966	A	G	4.34948e-10
	FD	D03	D03_32361086	32361086	C	T	2.76728e-09
	FD	D03	D03_32361341	32361341	C	T	4.41877e-10
	FD	D03	D03_32363936	32363936	T	C	1.71757e-07
	FD	D03	D03_32364028	32364028	C	T	5.14637e-08
	FD	D03	D03_32364131	32364131	A	C	1.37364e-08
	FD	D03	D03_32364150	32364150	G	A	7.55332e-11
	FD	D03	D03_32368844	32368844	G	A	3.08499e-09
	FD	D03	D03_32370629	32370629	A	G	1.76265e-09
	FD	D03	D03_32370639	32370639	A	T	1.8529e-09
	FD	D03	D03_32371228	32371228	A	G	8.44649e-10
	FD	D03	D03_32371253	32371253	A	G	8.12225e-10
	FD	D03	D03_32372046	32372046	T	C	1.11285e-07
	FD	D03	D03_32372531	32372531	C	T	2.16971e-08
	FD	D03	D03_32373040	32373040	C	T	3.76552e-07
	FD	D03	D03_32373095	32373095	C	A	3.50604e-07
	FD	D03	D03_32373739	32373739	G	A	2.52458e-09
	FD	D03	D03_32374011	32374011	A	G	2.24554e-09
	FD	D03	D03_32374085	32374085	A	C	3.99372e-10
	FD	D03	D03_32374118	32374118	G	A	1.48432e-09
	FD	D03	D03_32374153	32374153	T	C	7.19774e-09
	FD	D03	D03_32374382	32374382	C	A	4.64735e-10
	FD	D03	D03_32374393	32374393	C	T	3.32303e-10
	FD	D03	D03_32374674	32374674	T	C	4.71639e-09
	FD	D03	D03_32374698	32374698	G	A	9.65428e-09
	FD	D03	D03_32374761	32374761	G	T	5.28248e-09
	FD	D03	D03_32374771	32374771	T	C	5.28248e-09
	FD	D03	D03_32375367	32375367	A	G	1.09351e-07
	FD	D03	D03_32375505	32375505	C	G	2.19695e-09
	FD	D03	D03_32379264	32379264	G	A	3.68547e-09
	FD	D03	D03_32383993	32383993	G	A	1.06201e-08
	FD	D03	D03_32383997	32383997	C	T	1.50823e-09
	FD	D03	D03_32384387	32384387	G	A	1.06516e-08
	FD	D03	D03_32384536	32384536	T	C	2.70222e-09
	FD	D03	D03_32384703	32384703	T	C	1.11109e-08
	FD	D03	D03_32384715	32384715	A	G	1.11109e-08
	FD	D03	D03_32384756	32384756	A	G	3.9043e-08
	FD	D03	D03_32385302	32385302	G	A	8.58657e-10
	FD	D03	D03_32385323	32385323	T	C	9.25254e-10
	FD	D03	D03_32385372	32385372	C	A	6.5376e-10
	FD	D03	D03_32385389	32385389	G	A	6.19377e-10
	FD	D03	D03_32385392	32385392	T	G	6.19377e-10
	FD	D03	D03_32385807	32385807	C	G	2.48409e-09
	FD	D03	D03_32386454	32386454	T	C	8.64721e-08
	FD	D03	D03_32386534	32386534	A	G	3.04353e-08
	FD	D03	D03_32389885	32389885	T	C	2.93589e-09
	FD	D03	D03_32390213	32390213	C	T	1.78758e-08
	FD	D03	D03_32390341	32390341	C	T	9.59677e-08
	FD	D03	D03_32391869	32391869	A	G	7.25101e-08
	FD	D03	D03_32391952	32391952	A	G	3.84543e-07
	FD	D03	D03_32392149	32392149	G	A	1.17946e-08
	FD	D03	D03_32392503	32392503	A	G	2.70222e-07
	FD	D03	D03_32392771	32392771	G	A	1.39863e-09
	FD	D03	D03_32393358	32393358	G	A	7.88035e-10
	FD	D03	D03_32393602	32393602	C	T	2.23205e-09
	FD	D03	D03_32396852	32396852	T	C	4.52124e-09
	FD	D03	D03_32399484	32399484	A	T	6.53343e-08
	FD	D03	D03_32402623	32402623	G	C	2.64421e-10
	FD	D03	D03_32403061	32403061	G	A	1.314e-09
	FD	D03	D03_32403165	32403165	A	C	1.09649e-08
	FD	D03	D03_32404566	32404566	A	G	1.91222e-10
	FD	D03	D03_32404722	32404722	C	A	7.31035e-10
	FD	D03	D03_32405041	32405041	C	T	3.30999e-10
	FD	D03	D03_32405071	32405071	C	T	2.79907e-11
	FD	D03	D03_32405339	32405339	T	A	1.4239e-09
	FD	D03	D03_32406003	32406003	A	G	9.5596e-09
	FD	D03	D03_32406054	32406054	T	A	1.36914e-09
	FD	D03	D03_32406126	32406126	T	C	2.53824e-09
	FD	D03	D03_32406356	32406356	G	A	3.93898e-08
	FD	D03	D03_32406368	32406368	G	C	4.82932e-08
	FD	D03	D03_32406959	32406959	T	C	3.11576e-08
	FD	D03	D03_32408532	32408532	G	A	2.5119e-10
	FD	D03	D03_32408655	32408655	T	C	1.73277e-09
	FD	D03	D03_32408668	32408668	G	C	6.55146e-08
	FD	D03	D03_32408769	32408769	C	A	1.28995e-09
	FD	D03	D03_32408811	32408811	C	T	2.12036e-09
	FD	D03	D03_32409133	32409133	A	G	2.81178e-09
	FD	D03	D03_32410764	32410764	G	T	2.45633e-08
	FD	D03	D03_32410822	32410822	C	A	4.45222e-09
	FD	D03	D03_32411770	32411770	A	G	1.47989e-08
	FD	D03	D03_32411830	32411830	G	A	1.483e-08
	FD	D03	D03_32415550	32415550	C	A	2.35761e-09
	FD	D03	D03_32415758	32415758	A	G	6.92293e-09
	FD	D03	D03_32415815	32415815	T	C	2.71037e-09
	FD	D03	D03_32416422	32416422	T	C	1.49804e-09
	FD	D03	D03_32416521	32416521	C	T	2.96867e-09
	FD	D03	D03_32416802	32416802	T	C	2.2869e-08
	FD	D03	D03_32417289	32417289	A	G	1.49343e-08
	FD	D03	D03_32417381	32417381	C	T	1.77625e-09
	FD	D03	D03_32417601	32417601	C	T	4.76457e-10
	FD	D03	D03_32417653	32417653	A	G	6.63169e-10
	FD	D03	D03_32417654	32417654	C	T	6.63169e-10
	FD	D03	D03_32417737	32417737	C	T	3.9418e-08
	FD	D03	D03_32417841	32417841	C	T	6.92754e-09
	FD	D03	D03_32418040	32418040	G	C	3.19474e-10
	FD	D03	D03_32418086	32418086	A	G	1.03762e-09
	FD	D03	D03_32418103	32418103	C	T	1.60182e-09
	FD	D03	D03_32418150	32418150	A	G	1.24338e-09
	FD	D03	D03_32418184	32418184	T	G	1.28658e-09
	FD	D03	D03_32432039	32432039	A	G	1.59341e-08
	FD	D03	D03_32432042	32432042	A	C	1.59341e-08
	FD	D03	D03_32432084	32432084	C	T	6.32258e-09
	FD	D03	D03_32432173	32432173	G	A	3.6446e-09
	FD	D03	D03_32432470	32432470	C	T	1.45727e-09
	FD	D03	D03_32432541	32432541	A	G	1.99047e-09
	FD	D03	D03_32432543	32432543	T	C	1.59732e-09
	FD	D03	D03_32432592	32432592	C	A	2.32658e-08
	FD	D03	D03_32432682	32432682	G	C	1.30511e-08
	FD	D03	D03_32432686	32432686	T	C	1.29502e-08
	FD	D03	D03_32433152	32433152	T	A	4.56761e-10
	FD	D03	D03_32433176	32433176	A	C	4.35935e-10
	FD	D03	D03_32433301	32433301	T	C	9.00219e-09
	FD	D03	D03_32433331	32433331	C	T	2.52977e-09
	FD	D03	D03_32435031	32435031	G	T	5.2311e-07
	FD	D03	D03_32435275	32435275	T	G	2.0115e-09
	FD	D03	D03_32435371	32435371	A	G	1.40772e-09
	FD	D03	D03_32435404	32435404	C	T	8.2299e-11
	FD	D03	D03_32435780	32435780	T	G	5.80238e-10
	FD	D03	D03_32435898	32435898	C	T	2.12031e-08
	FD	D03	D03_32436119	32436119	C	T	1.05331e-09
	FD	D03	D03_32436194	32436194	T	C	3.4679e-10
	FD	D03	D03_32436207	32436207	G	A	3.63758e-10
	FD	D03	D03_32436380	32436380	T	C	8.58006e-10
	FD	D03	D03_32436611	32436611	G	A	1.77147e-09
	FD	D03	D03_32436654	32436654	C	T	1.34821e-09
	FD	D03	D03_32436862	32436862	G	A	1.37293e-10
	FD	D03	D03_32436876	32436876	C	T	3.00049e-10
	FD	D03	D03_32436898	32436898	T	C	1.09413e-10
	FD	D03	D03_32437119	32437119	A	C	1.70069e-09
	FD	D03	D03_32437194	32437194	C	T	5.23915e-10
	FD	D03	D03_32437344	32437344	G	A	1.44017e-09
	FD	D03	D03_32437427	32437427	T	G	1.40228e-09
	FD	D03	D03_32437521	32437521	C	A	2.76945e-10
	FD	D03	D03_32437556	32437556	A	G	1.34383e-08
	FD	D03	D03_32437565	32437565	T	C	1.34383e-08
	FD	D03	D03_32437602	32437602	C	T	1.87688e-08
	FD	D03	D03_32437619	32437619	T	C	1.48434e-08
	FD	D03	D03_32437646	32437646	C	T	1.49783e-07
	FD	D03	D03_32437725	32437725	A	G	3.06253e-09
	FD	D03	D03_32437965	32437965	C	T	3.67907e-10
	FD	D03	D03_32438121	32438121	C	T	4.40251e-10
	FD	D03	D03_32438382	32438382	A	G	2.62249e-08
	FD	D03	D03_32438450	32438450	T	C	2.49893e-08
	FD	D03	D03_32438619	32438619	G	A	5.27069e-09
	FD	D03	D03_32438641	32438641	G	A	3.27918e-08
	FD	D03	D03_32438651	32438651	A	G	3.27918e-08
	FD	D03	D03_32438674	32438674	A	C	6.67096e-09
	FD	D03	D03_32438677	32438677	T	C	6.61146e-09
	FD	D03	D03_32438693	32438693	C	T	3.4449e-09
	FD	D03	D03_32439268	32439268	A	G	1.67067e-09
	FD	D03	D03_32439272	32439272	T	G	1.67067e-09
	FD	D03	D03_32439355	32439355	G	A	2.21225e-09
	FD	D03	D03_32439912	32439912	G	A	1.11741e-08
	FD	D03	D03_32439964	32439964	G	T	3.09666e-10
	FD	D03	D03_32440168	32440168	C	T	1.05172e-09
	FD	D03	D03_32441061	32441061	A	G	4.429e-08
	FD	D03	D03_32441184	32441184	G	A	1.71661e-10
	FD	D03	D03_32445365	32445365	A	G	4.86398e-10
	FD	D03	D03_32445792	32445792	T	C	2.82027e-07
	FD	D03	D03_32445922	32445922	T	C	8.30661e-10
	FD	D03	D03_32445930	32445930	T	A	6.09659e-10
	FD	D03	D03_32446385	32446385	A	C	7.55853e-08
	FD	D03	D03_32447551	32447551	G	C	2.13816e-08
	FD	D03	D03_32448782	32448782	C	T	9.55938e-09
	FD	D03	D03_32448804	32448804	A	G	8.00161e-09
	FD	D03	D03_32448814	32448814	C	A	8.96095e-09
	FD	D03	D03_32450309	32450309	A	C	2.45021e-08
	FD	D03	D03_32452451	32452451	T	C	4.99082e-09
	FD	D03	D03_32452555	32452555	T	A	3.19502e-09
	FD	D03	D03_32453190	32453190	T	C	1.05327e-09
	FD	D03	D03_32453721	32453721	T	C	2.02367e-09
	FD	D03	D03_32457374	32457374	G	A	6.14148e-08
	FD	D03	D03_32457834	32457834	A	G	1.48703e-07
	FD	D03	D03_32459330	32459330	T	A	8.52731e-10
	FD	D03	D03_32459973	32459973	T	A	1.22462e-09
	FD	D03	D03_32464800	32464800	T	C	4.10858e-10
	FD	D03	D03_32465871	32465871	A	T	2.10577e-09
	FD	D03	D03_32468552	32468552	A	G	8.75048e-09
	FD	D03	D03_32468818	32468818	T	C	2.80559e-10
	FD	D03	D03_32471269	32471269	G	T	1.23739e-08
	FD	D03	D03_32475982	32475982	T	C	6.9441e-09
	FD	D03	D03_32478174	32478174	A	C	1.2753e-09
	FD	D03	D03_32478189	32478189	T	C	1.40895e-09
	FD	D03	D03_32478426	32478426	C	G	6.94109e-08
	FD	D03	D03_32478477	32478477	A	G	2.40997e-09
	FD	D03	D03_32479681	32479681	T	C	7.95514e-09
	FD	D03	D03_32479852	32479852	C	T	7.90103e-10
	FD	D03	D03_32480126	32480126	G	A	6.84518e-08
	FD	D03	D03_32480210	32480210	T	C	1.2023e-08
	FD	D03	D03_32481686	32481686	A	G	2.09664e-09
	FD	D03	D03_32484131	32484131	C	T	8.13909e-09
	FD	D03	D03_32484215	32484215	C	T	1.26421e-09
	FD	D03	D03_32484379	32484379	A	G	3.79244e-09
	FD	D03	D03_32485852	32485852	G	A	2.21168e-08
	FD	D03	D03_32486287	32486287	T	G	1.35166e-09
	FD	D03	D03_32491521	32491521	G	T	1.22815e-08
	FD	D03	D03_32491540	32491540	G	T	8.77939e-09
	FD	D03	D03_32502852	32502852	A	G	1.05375e-08
	FD	D03	D03_32503638	32503638	T	C	2.40134e-09
	FD	D03	D03_32504382	32504382	G	T	1.18773e-09
	FD	D03	D03_32505675	32505675	G	T	7.43901e-10
	FD	D03	D03_32514276	32514276	T	C	1.04701e-08
	FD	D03	D03_32514457	32514457	A	C	4.87837e-10
	FD	D03	D03_32518834	32518834	T	G	1.05029e-08
	FD	D03	D03_32520253	32520253	T	G	2.56999e-09
	FD	D03	D03_32520262	32520262	A	G	3.18045e-09
	FD	D03	D03_32520555	32520555	A	C	4.92425e-10
	FD	D03	D03_32533108	32533108	A	G	7.15046e-10
	FD	D03	D03_32533185	32533185	A	T	4.03134e-09
	FD	D03	D03_32535122	32535122	G	T	1.41752e-09
	FD	D03	D03_32541741	32541741	G	A	2.92705e-10
	FD	D03	D03_32542724	32542724	C	T	1.23382e-09
	FD	D03	D03_32542789	32542789	G	A	3.76938e-09
	FD	D03	D03_32542961	32542961	T	A	2.42717e-09
	FD	D03	D03_32543327	32543327	G	A	3.05772e-08
	FD	D03	D03_32543698	32543698	C	T	1.46833e-09
	FD	D03	D03_32544716	32544716	G	A	1.17497e-08
	FD	D03	D03_32545023	32545023	C	A	7.79487e-08
	FD	D03	D03_32545066	32545066	G	A	1.20279e-08
	FD	D03	D03_32545254	32545254	A	G	1.41822e-08
	FD	D03	D03_32545378	32545378	C	T	4.1243e-10
	FD	D03	D03_32545401	32545401	T	G	3.30957e-10
	FD	D03	D03_32545530	32545530	T	C	5.89942e-09
	FD	D03	D03_32545549	32545549	C	A	9.49345e-10
	FD	D03	D03_32545711	32545711	T	C	1.31812e-08
	FD	D03	D03_32546033	32546033	T	C	7.18077e-08
	FD	D03	D03_32546052	32546052	G	A	8.3289e-08
	FD	D03	D03_32546279	32546279	A	G	2.06631e-09
	FD	D03	D03_32546747	32546747	G	C	5.44829e-09
	FD	D03	D03_32547015	32547015	C	A	7.40856e-09
	FD	D03	D03_32549191	32549191	G	A	2.32916e-10
	FD	D03	D03_32549391	32549391	T	G	2.99802e-09
	FD	D03	D03_32557477	32557477	C	T	7.25812e-09
	FD	D03	D03_32558224	32558224	G	T	1.54061e-08
	FD	D03	D03_32558386	32558386	A	G	1.29251e-09
	FD	D03	D03_32568727	32568727	A	G	5.64723e-10
	FD	D03	D03_32568746	32568746	A	G	4.46635e-10
	FD	D03	D03_32568855	32568855	G	A	1.45727e-09
	FD	D03	D03_32569849	32569849	A	G	2.49177e-09
	FD	D03	D03_32570144	32570144	T	C	4.7458e-10
	FD	D03	D03_32570280	32570280	A	G	1.35663e-08
	FD	D03	D03_32570341	32570341	T	C	1.51627e-09
	FD	D03	D03_32570540	32570540	G	A	2.62428e-10
	FD	D03	D03_32570850	32570850	G	A	2.3531e-08
	FD	D03	D03_32571406	32571406	G	A	8.0928e-10
	FD	D03	D03_32571670	32571670	G	A	2.0236e-09
	FD	D03	D03_32574117	32574117	T	A	1.47988e-08
	FD	D03	D03_32581138	32581138	C	T	7.32683e-08
	FD	D03	D03_32581246	32581246	T	C	1.01403e-08
	FD	D03	D03_32581328	32581328	C	T	1.60999e-08
	FD	D03	D03_32581569	32581569	G	A	1.47304e-09
	FD	D03	D03_32582235	32582235	G	A	2.86103e-10
	FD	D03	D03_32582298	32582298	A	C	5.96187e-09
	FD	D03	D03_32583569	32583569	A	C	8.99526e-11
	FD	D03	D03_32583748	32583748	C	T	3.31236e-10
	FD	D03	D03_32584646	32584646	T	A	1.03392e-09
	FD	D03	D03_32585389	32585389	G	A	1.00625e-09
	FD	D03	D03_32585430	32585430	A	G	5.06053e-09
	FD	D03	D03_32585552	32585552	A	G	2.01724e-09
	FD	D03	D03_32585751	32585751	T	C	2.02022e-09
	FD	D03	D03_32586255	32586255	T	A	7.17951e-11
	FD	D03	D03_32586615	32586615	A	G	1.53708e-09
	FD	D03	D03_32586916	32586916	G	A	1.89114e-09
	FD	D03	D03_32587043	32587043	C	T	5.38679e-10
	FD	D03	D03_32587066	32587066	G	A	6.21425e-10
	FD	D03	D03_32587215	32587215	C	T	1.35227e-09
	FD	D03	D03_32587290	32587290	G	A	4.18246e-08
	FD	D03	D03_32587355	32587355	T	C	4.04935e-10
	FD	D03	D03_32587398	32587398	A	G	1.28472e-08
	FD	D03	D03_32587779	32587779	T	G	4.84469e-09
	FD	D03	D03_32587804	32587804	T	G	3.51797e-09
	FD	D03	D03_32588036	32588036	G	C	1.42048e-08
	FD	D03	D03_32588198	32588198	G	A	8.04862e-10
	FD	D03	D03_32635192	32635192	A	G	3.66911e-08
	FD	D03	D03_32890385	32890385	A	G	2.52058e-09
	FD	D03	D03_32891085	32891085	C	T	4.13889e-07
	FD	D03	D03_32892031	32892031	G	A	8.37275e-10
	FD	D03	D03_32892947	32892947	C	T	2.96188e-08
	FD	D03	D03_32893158	32893158	A	G	1.99739e-07
	FD	D03	D03_32893159	32893159	A	G	1.99739e-07
	FD	D03	D03_32893176	32893176	A	G	1.87815e-07
	FD	D03	D03_32893520	32893520	G	A	7.75299e-07
	FD	D03	D03_32893576	32893576	A	G	1.6982e-08
	FD	D03	D03_32893603	32893603	C	A	1.32652e-08
	FD	D03	D03_32893625	32893625	G	A	1.55233e-08
	FD	D03	D03_32894611	32894611	G	T	1.06002e-07
	FD	D03	D03_32894719	32894719	A	G	1.90036e-08
	FD	D03	D03_32894740	32894740	G	A	2.11378e-08
	FD	D03	D03_32894889	32894889	T	C	2.9464e-08
	FD	D03	D03_32895604	32895604	C	A	2.98196e-10
	FD	D03	D03_32895605	32895605	G	A	2.98196e-10
	FD	D03	D03_32895717	32895717	C	T	2.48993e-10
	FD	D03	D03_32895742	32895742	C	T	9.64882e-09
	FD	D03	D03_32895928	32895928	A	G	9.53816e-10
	FD	D03	D03_32896070	32896070	C	T	2.87646e-08
	FD	D03	D03_32900195	32900195	A	T	1.29747e-07
	FD	D03	D03_32900291	32900291	G	A	6.92134e-09
	FD	D03	D03_38522475	38522475	A	G	2.95318e-12
	FD	D03	D03_38848767	38848767	T	C	2.56058e-18
	FD	D03	D03_38936917	38936917	A	G	2.6392e-13
	FD	D03	D03_39132242	39132242	A	C	6.98346e-14
	FD	D03	D03_39184099	39184099	C	A	4.18378e-08
	FD	D03	D03_39477406	39477406	T	C	1.6267e-07
	FD	D03	D03_39491480	39491480	A	G	1.08926e-13
	FD	D03	D03_39672998	39672998	T	C	1.2297e-13
	FD	D03	D03_39887149	39887149	G	T	3.09108e-11
	FD	D03	D03_39892732	39892732	T	C	7.03718e-14
	FD	D03	D03_40054964	40054964	A	G	6.98453e-16
	FD	D03	D03_40088035	40088035	A	G	3.08917e-17
	FD	D03	D03_40259735	40259735	T	C	1.46751e-12
	FD	D03	D03_40371129	40371129	A	G	4.09632e-13
	FD	D03	D03_40545442	40545442	A	G	2.49106e-13
	FD	D03	D03_40596197	40596197	A	C	2.93525e-09
	FD	D03	D03_40697011	40697011	G	A	3.50867e-12
	FD	D03	D03_40723801	40723801	A	T	2.22455e-10
	FD	D03	D03_40979761	40979761	A	G	3.20069e-11
	FD	D03	D03_40988063	40988063	A	G	4.17774e-10
	FD	D03	D03_41096103	41096103	A	G	1.07053e-12
	FD	D03	D03_41122803	41122803	T	C	1.25886e-11
	FD	D03	D03_43621135	43621135	T	C	7.04818e-07
	FD	D08	D08_67338388	67338388	T	C	6.61301e-07
	FD	D08	D08_67338773	67338773	T	A	7.08615e-07
	FD	D12	D12_43144816	43144816	A	T	5.05748e-07
	FL	A07	A07_90498854	90498854	A	G	5.99485e-07
	FS	A07	A07_88739209	88739209	A	G	2.44742e-07
	FS	A07	A07_90317784	90317784	A	T	1.144e-07
	FS	A07	A07_90319816	90319816	A	G	2.20405e-08
	FS	A07	A07_90319852	90319852	C	T	1.82671e-08
	FS	A07	A07_90340348	90340348	T	C	1.63143e-08
	FS	A07	A07_90340446	90340446	T	C	2.96612e-08
	FS	A07	A07_90340531	90340531	A	G	1.27779e-08
	FS	A07	A07_90341247	90341247	A	G	3.14401e-08
	FS	A07	A07_90341532	90341532	C	T	2.49701e-08
	FS	A07	A07_90342138	90342138	C	T	2.13916e-08
	FS	A07	A07_90343058	90343058	T	C	4.05053e-08
	FS	A07	A07_90344552	90344552	A	C	1.28332e-08
	FS	A07	A07_90452832	90452832	G	A	3.6851e-08
	FS	A07	A07_90453460	90453460	C	A	1.1084e-09
	FS	A07	A07_90453726	90453726	A	C	7.39717e-09
	FS	A07	A07_90453789	90453789	C	G	3.21979e-09
	FS	A07	A07_90457284	90457284	T	C	3.12557e-09
	FS	A07	A07_90457326	90457326	A	C	3.23754e-09
	FS	A07	A07_90458162	90458162	T	G	2.10737e-09
	FS	A07	A07_90460145	90460145	T	A	2.32373e-10
	FS	A07	A07_90461904	90461904	T	C	6.70705e-09
	FS	A07	A07_90463270	90463270	A	C	3.30634e-09
	FS	A07	A07_90463285	90463285	A	C	2.79107e-09
	FS	A07	A07_90463515	90463515	A	C	3.3735e-09
	FS	A07	A07_90463548	90463548	T	C	2.44297e-09
	FS	A07	A07_90464295	90464295	A	C	5.94329e-09
	FS	A07	A07_90464519	90464519	T	C	7.11894e-11
	FS	A07	A07_90464540	90464540	T	G	7.892e-07
	FS	A07	A07_90464553	90464553	G	A	2.03488e-10
	FS	A07	A07_90468284	90468284	T	G	5.64985e-10
	FS	A07	A07_90469148	90469148	A	T	2.9478e-08
	FS	A07	A07_90469718	90469718	A	G	5.51728e-08
	FS	A07	A07_90470602	90470602	C	T	9.36732e-09
	FS	A07	A07_90470723	90470723	A	G	2.61144e-08
	FS	A07	A07_90470827	90470827	A	G	7.50563e-10
	FS	A07	A07_90471608	90471608	A	G	1.0656e-09
	FS	A07	A07_90473102	90473102	A	G	2.86634e-09
	FS	A07	A07_90473103	90473103	A	G	2.86634e-09
	FS	A07	A07_90477052	90477052	T	C	3.21816e-09
	FS	A07	A07_90477274	90477274	A	G	7.62989e-09
	FS	A07	A07_90478571	90478571	T	C	1.73275e-08
	FS	A07	A07_90479967	90479967	G	A	9.73106e-10
	FS	A07	A07_90488968	90488968	T	A	2.52748e-09
	FS	A07	A07_90490830	90490830	C	T	4.91426e-09
	FS	A07	A07_90493480	90493480	T	C	4.14439e-09
	FS	A07	A07_90494072	90494072	A	G	1.98674e-09
	FS	A07	A07_90495787	90495787	A	G	4.61995e-09
	FS	A07	A07_90495798	90495798	T	C	2.39759e-09
	FS	A07	A07_90497237	90497237	G	A	3.713e-09
	FS	A07	A07_90497375	90497375	T	A	1.7603e-09
	FS	A07	A07_90497492	90497492	A	C	4.02344e-09
	FS	A07	A07_90498149	90498149	A	G	1.50512e-08
	FS	A07	A07_90498927	90498927	T	C	6.8868e-10
	FS	A07	A07_90499176	90499176	A	G	4.6395e-09
	FS	A07	A07_90503224	90503224	A	G	1.1647e-09
	FS	A07	A07_90503285	90503285	A	G	6.59375e-10
	FS	A07	A07_90503351	90503351	A	G	1.70515e-10
	FS	A07	A07_90503508	90503508	C	T	4.9545e-09
	FS	A07	A07_90512206	90512206	C	T	4.07167e-10
	FS	A07	A07_90512448	90512448	A	T	2.80478e-08
	FS	A07	A07_90512741	90512741	G	T	2.77913e-08
	FS	A07	A07_90512808	90512808	G	T	4.01602e-09
	FS	A07	A07_90515557	90515557	C	G	4.49301e-09
	FS	A07	A07_90515678	90515678	T	C	8.72678e-09
	FS	A07	A07_90515809	90515809	C	T	3.10936e-09
	FS	A07	A07_90519682	90519682	A	C	1.1418e-08
	FS	A07	A07_90523037	90523037	T	G	3.21903e-09
	FS	A07	A07_90523364	90523364	A	G	1.67138e-10
	FS	A07	A07_90523871	90523871	T	C	1.85557e-09
	FS	A07	A07_90523938	90523938	C	T	6.66164e-10
	FS	A07	A07_90540767	90540767	G	T	5.7789e-09
	FS	A07	A07_90540787	90540787	G	A	5.80231e-09
	FS	A07	A07_90543362	90543362	G	T	1.34647e-09
	FS	A07	A07_90547005	90547005	C	T	3.09978e-09
	FS	A07	A07_90550614	90550614	A	G	3.44542e-08
	FS	A07	A07_90559445	90559445	T	C	7.73399e-10
	FS	A07	A07_90559451	90559451	T	C	6.37107e-10
	FS	A07	A07_90560857	90560857	A	G	1.88917e-09
	FS	A07	A07_90561090	90561090	T	C	6.47005e-09
	FS	A07	A07_90561217	90561217	A	G	1.1079e-08
	FS	A07	A07_90561227	90561227	C	G	1.1079e-08
	FS	A07	A07_90561986	90561986	G	A	2.37659e-09
	FS	A07	A07_90562171	90562171	A	G	3.56663e-08
	FS	A07	A07_90562378	90562378	A	G	2.36439e-10
	FS	A07	A07_90562670	90562670	G	A	1.23796e-08
	FS	A07	A07_90562976	90562976	A	C	1.84698e-09
	FS	A07	A07_90563073	90563073	T	C	3.61102e-09
	FS	A07	A07_90563205	90563205	T	G	1.71116e-09
	FS	A07	A07_90563347	90563347	C	T	3.34006e-09
	FS	A07	A07_90563349	90563349	T	C	3.34006e-09
	FS	A07	A07_90563410	90563410	A	G	4.43361e-09
	FS	A07	A07_90563452	90563452	A	G	4.16985e-09
	FS	A07	A07_90563467	90563467	C	T	4.4532e-09
	FS	A07	A07_90569355	90569355	T	A	1.72631e-09
	FS	A07	A07_90570135	90570135	A	G	3.23643e-09
	FS	A07	A07_90570468	90570468	A	G	3.33899e-09
	FS	A07	A07_90574876	90574876	G	A	2.00297e-09
	FS	A07	A07_90574877	90574877	A	T	2.00297e-09
	FS	A07	A07_90578288	90578288	C	T	2.6927e-08
	FS	A07	A07_90579218	90579218	A	G	1.68938e-09
	FS	A07	A07_90579245	90579245	G	A	3.24645e-09
	FS	A07	A07_90579293	90579293	A	G	3.87201e-08
	FS	A07	A07_90579597	90579597	A	C	1.8659e-11
	FS	A07	A07_90580154	90580154	G	A	4.45568e-09
	FS	A07	A07_90580337	90580337	A	G	1.26444e-09
	FS	A07	A07_90581136	90581136	T	C	9.46138e-09
	FS	A07	A07_90586336	90586336	G	A	1.17025e-09
	FS	A07	A07_90586569	90586569	G	A	2.74179e-09
	FS	A07	A07_90587136	90587136	G	A	5.21715e-09
	FS	A07	A07_90587279	90587279	T	C	1.72822e-09
	FS	A07	A07_90587347	90587347	C	T	1.06388e-09
	FS	A07	A07_90587672	90587672	A	G	4.2684e-10
	FS	A07	A07_90587710	90587710	T	C	4.69395e-10
	FS	A07	A07_90587719	90587719	T	G	4.69395e-10
	FS	A07	A07_90587857	90587857	T	G	2.30504e-10
	FS	A07	A07_90587986	90587986	A	G	2.82202e-09
	FS	A07	A07_90588030	90588030	G	A	3.21075e-09
	FS	A07	A07_90588123	90588123	G	T	5.79934e-09
	FS	A07	A07_90588208	90588208	A	G	8.62459e-09
	FS	A07	A07_90588245	90588245	G	A	2.89101e-09
	FWPB	A02	A02_100858894	100858894	C	T	5.41851e-07
	FWPB	A02	A02_100862943	100862943	T	C	4.6461e-07
	FWPB	A02	A02_100873805	100873805	G	T	9.89617e-07
	FWPB	A08	A08_24095309	24095309	A	G	1.13998e-08
	FWPB	A08	A08_24095321	24095321	A	C	1.34933e-07
	FWPB	A08	A08_38280919	38280919	A	G	3.56439e-08
	FWPB	A08	A08_38280955	38280955	C	G	9.26604e-07
	FWPB	A08	A08_38578570	38578570	C	T	1.49797e-07
	FWPB	A08	A08_38603048	38603048	T	A	4.57135e-07
	FWPB	A08	A08_50501195	50501195	T	C	3.12645e-07
	FWPB	A08	A08_52515911	52515911	T	C	7.89095e-07
	FWPB	A08	A08_61811133	61811133	T	C	3.54853e-07
	FWPB	A08	A08_69746099	69746099	T	A	4.53682e-07
	FWPB	D02	D02_5880919	5880919	G	A	2.99458e-07
	FWPB	D02	D02_5880979	5880979	C	G	5.09002e-07
	FWPB	D02	D02_5887671	5887671	T	C	9.90287e-07
	FWPB	D02	D02_5888133	5888133	G	C	4.60916e-07
	FWPB	D02	D02_5888325	5888325	C	T	4.07761e-08
	FWPB	D02	D02_5888347	5888347	C	T	1.6212e-07
	FWPB	D02	D02_5888929	5888929	G	T	2.67819e-07
	FWPB	D02	D02_5888961	5888961	A	C	8.77861e-07
	FWPB	D11	D11_28246438	28246438	C	T	9.84017e-09
	FWPB	D11	D11_28758561	28758561	G	A	6.25296e-08
	FWPB	D11	D11_28761588	28761588	G	A	8.56634e-08
	FWPB	D11	D11_28761627	28761627	G	A	1.50689e-07
	FWPB	D11	D11_28816107	28816107	T	C	2.21867e-08
	FWPB	D11	D11_28816719	28816719	T	C	6.94513e-08
	FWPB	D11	D11_28816739	28816739	T	C	5.744e-08
	FWPB	D11	D11_28832701	28832701	T	G	3.0956e-08
	FWPB	D11	D11_28839754	28839754	T	C	9.16664e-08
	FWPB	D11	D11_28839811	28839811	T	C	2.98528e-07
	FWPB	D11	D11_28840237	28840237	T	C	4.03584e-07
	FWPB	D11	D11_28844491	28844491	T	C	1.33608e-07
	FWPB	D11	D11_28941078	28941078	C	T	1.21913e-07
	FWPB	D11	D11_28946596	28946596	A	G	2.41605e-07
	FWPB	D11	D11_28951269	28951269	C	A	1.37569e-07
	FWPB	D11	D11_28959679	28959679	T	C	1.15937e-07
	FWPB	D11	D11_28959807	28959807	T	C	1.12685e-07
	FWPB	D11	D11_28959813	28959813	G	C	1.12685e-07
	FWPB	D11	D11_28972918	28972918	G	A	1.17748e-07
	FWPB	D11	D11_28990696	28990696	G	A	1.35462e-07
	FWPB	D11	D11_28994660	28994660	A	G	4.05477e-07
	FWPB	D11	D11_28997488	28997488	C	T	1.67372e-07
	FWPB	D11	D11_29001931	29001931	G	A	3.35452e-07
	FWPB	D11	D11_29002071	29002071	C	T	6.95677e-07
	FWPB	D11	D11_29087086	29087086	G	A	3.95179e-08
	FWPB	D11	D11_29087394	29087394	A	T	3.72843e-07
	FWPB	D11	D11_29088102	29088102	C	T	7.13e-08
	FWPB	D11	D11_29090481	29090481	C	T	4.53606e-08
	FWPB	D11	D11_29091590	29091590	G	A	1.16832e-07
	FWPB	D11	D11_29095157	29095157	C	T	5.4095e-08
	FWPB	D11	D11_29096670	29096670	C	A	1.11021e-07
	FWPB	D11	D11_29096727	29096727	T	C	1.04677e-07
	FWPB	D11	D11_29097116	29097116	C	T	9.2905e-08
	FWPB	D11	D11_29099531	29099531	C	T	1.29176e-07
	FWPB	D11	D11_29100643	29100643	G	A	3.40875e-07
	FWPB	D11	D11_29101687	29101687	G	A	1.78003e-07
	FWPB	D11	D11_29103179	29103179	G	A	1.23339e-07
	FWPB	D11	D11_29103502	29103502	C	A	8.16823e-08
	FWPB	D11	D11_29105192	29105192	C	T	4.19006e-08
	FWPB	D11	D11_29105882	29105882	C	T	6.45779e-08
	FWPB	D11	D11_29107708	29107708	C	T	1.67843e-07
	FWPB	D11	D11_29111375	29111375	G	A	9.74012e-08
	FWPB	D11	D11_29112288	29112288	A	C	8.60295e-08
	FWPB	D11	D11_29251088	29251088	C	T	2.37706e-08
	FWPB	D11	D11_38521071	38521071	C	T	1.76661e-07
	FWPB	D11	D11_39945213	39945213	C	T	8.28935e-08
	LP	A02	A02_97246028	97246028	C	T	2.19112e-07
	LP	A02	A02_97248210	97248210	A	G	7.13862e-07
	LP	A02	A02_97250053	97250053	T	C	6.25073e-07
	LP	A02	A02_97261646	97261646	T	C	3.03118e-07
	LP	A02	A02_97261699	97261699	A	G	1.90843e-07
	LP	A02	A02_97261933	97261933	A	G	7.33216e-07
	LP	A02	A02_97262698	97262698	G	A	5.45407e-07
	LP	A02	A02_97262748	97262748	A	G	2.76502e-07
	LP	A02	A02_97262795	97262795	A	G	5.00393e-07
	LP	A02	A02_97263526	97263526	G	A	6.02098e-07
	LP	A02	A02_97264605	97264605	G	A	9.58368e-07
	LP	A02	A02_97264621	97264621	T	C	9.87575e-07
	LP	A02	A02_97265369	97265369	C	T	3.46388e-07
	LP	A02	A02_97265791	97265791	T	C	5.10783e-07
	LP	A02	A02_97266015	97266015	G	A	5.68143e-07
	LP	A02	A02_97267095	97267095	C	T	4.06741e-07
	LP	A02	A02_97267159	97267159	T	C	5.82608e-07
	LP	A02	A02_97267185	97267185	G	T	1.70451e-07
	LP	A02	A02_97267253	97267253	G	C	7.28891e-07
	LP	A02	A02_97267721	97267721	G	A	3.69869e-07
	LP	A02	A02_97269007	97269007	A	G	8.77123e-07
	LP	A02	A02_97269269	97269269	T	C	3.85014e-07
	LP	A02	A02_97269628	97269628	G	T	5.93265e-07
	LP	A02	A02_97269649	97269649	C	T	4.27253e-07
	LP	A02	A02_97269654	97269654	G	T	4.27253e-07
	LP	A02	A02_97270385	97270385	A	G	4.70076e-07
	LP	A02	A02_97271046	97271046	A	T	5.87183e-07
	LP	A02	A02_97277089	97277089	G	C	8.31611e-07
	LP	A02	A02_97277098	97277098	T	C	5.26028e-07
	LP	A02	A02_97277187	97277187	T	C	6.18417e-07
	LP	A02	A02_97277373	97277373	G	A	4.31659e-07
	LP	A02	A02_97284052	97284052	A	G	3.36892e-07
	LP	A02	A02_97284652	97284652	C	A	3.5396e-07
	LP	A02	A02_97288506	97288506	G	T	3.88636e-07
	LP	A02	A02_97288516	97288516	A	G	5.89784e-07
	LP	A02	A02_97294037	97294037	C	G	9.47493e-07
	LP	A02	A02_97380979	97380979	T	C	2.17981e-07
	LP	A02	A02_97402725	97402725	A	G	4.1497e-07
	LP	A02	A02_97406614	97406614	T	G	8.87278e-07
	LP	A02	A02_97406835	97406835	G	A	4.65503e-07
	LP	A02	A02_97406852	97406852	C	T	3.45994e-07
	LP	A02	A02_97407085	97407085	G	T	4.62522e-07
	LP	A02	A02_97407090	97407090	C	T	2.58988e-07
	LP	A02	A02_97407328	97407328	T	A	2.05642e-07
	LP	A02	A02_97408299	97408299	A	T	6.25209e-07
	LP	A02	A02_97408620	97408620	A	G	5.34061e-07
	LP	A02	A02_97408816	97408816	C	T	8.09455e-07
	LP	A02	A02_97409206	97409206	G	A	7.12443e-07
	LP	A02	A02_97409974	97409974	C	T	6.20464e-07
	LP	A02	A02_97410618	97410618	A	G	4.39298e-07
	LP	A02	A02_97410634	97410634	A	G	4.74556e-07
	LP	A02	A02_97410915	97410915	G	T	4.74361e-07
	LP	A02	A02_97411277	97411277	A	T	8.06452e-07
	LP	A02	A02_97412389	97412389	G	C	4.94742e-07
	LP	A02	A02_97412787	97412787	C	T	4.36846e-07
	LP	A02	A02_97412788	97412788	A	G	2.49495e-07
	LP	A02	A02_97412858	97412858	C	T	4.404e-07
	LP	A02	A02_97415811	97415811	A	G	8.7877e-07
	LP	A02	A02_97415849	97415849	T	C	8.91406e-07
	LP	A02	A02_97416214	97416214	T	A	2.0948e-07
	LP	A02	A02_97416280	97416280	T	C	6.39848e-07
	LP	A02	A02_97417315	97417315	T	C	4.82582e-07
	LP	A02	A02_97417414	97417414	G	T	3.7367e-07
	LP	A02	A02_97417427	97417427	A	G	6.51315e-07
	LP	A02	A02_97419614	97419614	A	T	1.7801e-07
	LP	A02	A02_97419760	97419760	G	T	3.46776e-07
	LP	A02	A02_97419868	97419868	A	G	6.99355e-07
	LP	A02	A02_97420026	97420026	C	T	4.28182e-07
	LP	A02	A02_97424333	97424333	C	T	2.80427e-07
	LP	A02	A02_97425259	97425259	G	A	2.37971e-07
	LP	A02	A02_97425264	97425264	A	G	4.37087e-07
	LP	A02	A02_97425688	97425688	T	A	2.01576e-07
	LP	A02	A02_97433514	97433514	T	C	9.12231e-07
	LP	A02	A02_97437813	97437813	C	T	9.86036e-07
	LP	A02	A02_97438803	97438803	A	G	5.66384e-07
	LP	A02	A02_97438909	97438909	A	G	6.45797e-07
	LP	A02	A02_97525401	97525401	A	G	1.94041e-07
	LP	A02	A02_100928547	100928547	A	G	2.59875e-07
	LP	A07	A07_3262757	3262757	T	C	7.95187e-07
	LP	A08	A08_23114693	23114693	A	G	2.6348e-07
	LP	A08	A08_24093800	24093800	A	G	1.78717e-08
	LP	A08	A08_24322857	24322857	G	A	7.38693e-08
	LP	A08	A08_25194609	25194609	A	G	1.87477e-07
	LP	A08	A08_25858454	25858454	T	C	2.56406e-08
	LP	A08	A08_25868446	25868446	T	C	1.27857e-08
	LP	A08	A08_26325644	26325644	T	G	1.56079e-07
	LP	A08	A08_26644124	26644124	C	G	1.15759e-09
	LP	A08	A08_26700267	26700267	A	C	9.05966e-07
	LP	A08	A08_26772377	26772377	T	C	3.17599e-08
	LP	A08	A08_26772395	26772395	A	G	5.55837e-09
	LP	A08	A08_26886521	26886521	T	C	4.67527e-08
	LP	A08	A08_27125417	27125417	A	G	4.14821e-07
	LP	A08	A08_27225292	27225292	T	C	7.67878e-07
	LP	A08	A08_27853085	27853085	C	T	1.46066e-07
	LP	A08	A08_27956724	27956724	C	T	2.16648e-07
	LP	A08	A08_28223374	28223374	C	T	3.26949e-08
	LP	A08	A08_28358643	28358643	G	A	5.94069e-07
	LP	A08	A08_28778048	28778048	C	T	3.05504e-09
	LP	A08	A08_28824078	28824078	C	T	3.28042e-09
	LP	A08	A08_28824970	28824970	G	A	6.70429e-10
	LP	A08	A08_29207189	29207189	G	A	2.60706e-08
	LP	A08	A08_29230432	29230432	T	C	3.81081e-09
	LP	A08	A08_29320563	29320563	A	G	2.49049e-07
	LP	A08	A08_29563520	29563520	A	G	4.256e-09
	LP	A08	A08_29605760	29605760	C	T	5.00547e-08
	LP	A08	A08_29606880	29606880	T	A	1.12819e-08
	LP	A08	A08_29606928	29606928	G	A	2.82948e-07
	LP	A08	A08_30575039	30575039	A	G	8.26613e-07
	LP	A08	A08_30897318	30897318	G	A	5.0773e-07
	LP	A08	A08_31347339	31347339	G	A	5.97096e-07
	LP	A08	A08_31692095	31692095	C	T	1.75938e-07
	LP	A08	A08_31783730	31783730	G	A	1.64565e-07
	LP	A08	A08_32087057	32087057	C	T	6.92564e-08
	LP	A08	A08_32222316	32222316	A	G	1.59732e-07
	LP	A08	A08_32225074	32225074	C	A	1.76849e-07
	LP	A08	A08_32237965	32237965	T	G	6.44301e-08
	LP	A08	A08_32361420	32361420	C	T	7.07401e-07
	LP	A08	A08_33216970	33216970	A	G	4.14307e-08
	LP	A08	A08_33257429	33257429	C	T	1.05222e-09
	LP	A08	A08_33779437	33779437	G	C	1.19122e-07
	LP	A08	A08_34197607	34197607	T	C	3.04494e-08
	LP	A08	A08_34264496	34264496	T	G	3.56217e-08
	LP	A08	A08_34800955	34800955	T	G	6.30679e-09
	LP	A08	A08_35487824	35487824	C	G	7.27558e-07
	LP	A08	A08_35838414	35838414	G	T	4.12858e-08
	LP	A08	A08_35925221	35925221	G	C	5.85851e-07
	LP	A08	A08_36148632	36148632	T	C	3.08776e-10
	LP	A08	A08_36183782	36183782	A	G	5.88272e-08
	LP	A08	A08_36183783	36183783	C	T	5.88272e-08
	LP	A08	A08_36671226	36671226	C	G	5.43993e-08
	LP	A08	A08_36918622	36918622	G	A	4.74363e-08
	LP	A08	A08_37017242	37017242	C	T	4.42661e-09
	LP	A08	A08_37068326	37068326	C	A	6.9346e-12
	LP	A08	A08_37069501	37069501	G	A	8.09777e-07
	LP	A08	A08_37167730	37167730	G	A	6.01023e-09
	LP	A08	A08_37167756	37167756	C	T	7.24667e-09
	LP	A08	A08_37388695	37388695	G	T	2.0215e-09
	LP	A08	A08_37853625	37853625	T	C	7.60827e-07
	LP	A08	A08_37938558	37938558	T	A	9.28727e-07
	LP	A08	A08_37995737	37995737	A	G	6.67827e-08
	LP	A08	A08_38144630	38144630	C	T	4.14472e-07
	LP	A08	A08_38396494	38396494	G	A	5.18223e-09
	LP	A08	A08_38523825	38523825	G	A	1.92183e-08
	LP	A08	A08_38593726	38593726	A	G	1.47163e-08
	LP	A08	A08_38621228	38621228	A	T	4.23572e-07
	LP	A08	A08_39609074	39609074	T	C	3.12885e-07
	LP	A08	A08_39695138	39695138	C	T	1.74111e-07
	LP	A08	A08_40243607	40243607	G	A	4.31114e-09
	LP	A08	A08_40429084	40429084	C	T	2.30209e-07
	LP	A08	A08_40429094	40429094	C	T	1.82484e-07
	LP	A08	A08_40541347	40541347	A	G	1.22122e-07
	LP	A08	A08_40617004	40617004	A	T	9.1332e-07
	LP	A08	A08_41237251	41237251	T	C	3.82511e-07
	LP	A08	A08_41453883	41453883	C	T	6.96115e-08
	LP	A08	A08_42614137	42614137	G	A	8.76734e-07
	LP	A08	A08_42696949	42696949	T	C	3.29727e-07
	LP	A08	A08_42851648	42851648	G	A	2.3917e-09
	LP	A08	A08_42851657	42851657	G	T	1.82743e-08
	LP	A08	A08_43629581	43629581	T	C	6.8195e-07
	LP	A08	A08_43679938	43679938	T	C	2.32111e-08
	LP	A08	A08_44268137	44268137	C	A	9.05847e-08
	LP	A08	A08_44563125	44563125	A	G	8.03384e-10
	LP	A08	A08_44563126	44563126	T	C	8.03384e-10
	LP	A08	A08_44834768	44834768	A	G	1.04085e-08
	LP	A08	A08_44881070	44881070	A	C	1.04415e-08
	LP	A08	A08_45568845	45568845	C	T	3.91182e-07
	LP	A08	A08_45568846	45568846	G	A	3.91182e-07
	LP	A08	A08_45591112	45591112	T	A	1.38166e-07
	LP	A08	A08_46168983	46168983	A	G	2.78973e-07
	LP	A08	A08_46670307	46670307	C	T	7.24263e-10
	LP	A08	A08_46874385	46874385	T	C	2.74134e-07
	LP	A08	A08_46874418	46874418	G	A	9.53564e-09
	LP	A08	A08_48247662	48247662	C	T	3.42974e-09
	LP	A08	A08_48276602	48276602	T	C	1.12787e-08
	LP	A08	A08_49220347	49220347	A	C	1.05938e-08
	LP	A08	A08_49292591	49292591	G	A	7.02218e-08
	LP	A08	A08_49991946	49991946	T	C	5.80026e-09
	LP	A08	A08_50914880	50914880	A	G	6.36993e-09
	LP	A08	A08_51033973	51033973	T	A	1.1993e-07
	LP	A08	A08_51377290	51377290	T	C	2.37595e-08
	LP	A08	A08_53732411	53732411	A	G	5.87482e-08
	LP	A08	A08_53739383	53739383	C	T	2.94723e-10
	LP	A08	A08_54496245	54496245	G	A	1.78536e-07
	LP	A08	A08_54704473	54704473	T	G	2.23112e-07
	LP	A08	A08_54793301	54793301	G	A	9.69914e-08
	LP	A08	A08_54922036	54922036	A	G	4.08818e-09
	LP	A08	A08_54975654	54975654	G	A	3.53714e-08
	LP	A08	A08_56009125	56009125	G	A	2.90911e-08
	LP	A08	A08_57026086	57026086	A	G	7.9394e-07
	LP	A08	A08_57085668	57085668	A	G	1.78832e-07
	LP	A08	A08_57605487	57605487	C	T	1.85913e-10
	LP	A08	A08_58108876	58108876	T	A	5.70906e-07
	LP	A08	A08_58136120	58136120	G	A	5.84026e-08
	LP	A08	A08_59045244	59045244	A	G	1.30471e-08
	LP	A08	A08_59587696	59587696	G	A	9.9639e-08
	LP	A08	A08_59761800	59761800	C	A	4.55706e-08
	LP	A08	A08_59826212	59826212	G	A	1.53406e-07
	LP	A08	A08_60420610	60420610	A	G	3.2582e-09
	LP	A08	A08_60705186	60705186	T	C	9.83879e-08
	LP	A08	A08_60705190	60705190	G	A	2.00061e-07
	LP	A08	A08_60956588	60956588	G	A	6.73697e-08
	LP	A08	A08_61164424	61164424	C	A	7.06591e-07
	LP	A08	A08_62305166	62305166	A	T	6.76966e-08
	LP	A08	A08_62389031	62389031	C	T	1.05256e-10
	LP	A08	A08_62671521	62671521	C	A	3.16665e-08
	LP	A08	A08_63319689	63319689	A	G	1.072e-09
	LP	A08	A08_63568064	63568064	G	A	4.23098e-07
	LP	A08	A08_63727877	63727877	T	C	1.81188e-09
	LP	A08	A08_63727878	63727878	C	T	1.81188e-09
	LP	A08	A08_63727942	63727942	T	C	3.92787e-07
	LP	A08	A08_63847094	63847094	T	C	1.63646e-07
	LP	A08	A08_64164443	64164443	T	G	5.09656e-07
	LP	A08	A08_64554724	64554724	G	T	5.83556e-07
	LP	A08	A08_64616369	64616369	C	T	1.65335e-09
	LP	A08	A08_65049285	65049285	A	G	1.85596e-07
	LP	A08	A08_65049310	65049310	A	G	4.33716e-09
	LP	A08	A08_65222770	65222770	C	T	7.35063e-07
	LP	A08	A08_65471676	65471676	T	C	8.03005e-09
	LP	A08	A08_65511841	65511841	T	A	1.94957e-09
	LP	A08	A08_65511844	65511844	G	A	1.94957e-09
	LP	A08	A08_65735221	65735221	G	C	3.0333e-07
	LP	A08	A08_65981131	65981131	C	T	3.03314e-10
	LP	A08	A08_66255956	66255956	C	T	1.55386e-08
	LP	A08	A08_66421570	66421570	A	C	1.88625e-09
	LP	A08	A08_66421606	66421606	T	C	1.39431e-08
	LP	A08	A08_66421713	66421713	T	G	1.08299e-09
	LP	A08	A08_66421731	66421731	T	G	1.38309e-08
	LP	A08	A08_66421737	66421737	C	A	6.27122e-10
	LP	A08	A08_66607794	66607794	C	T	3.20379e-07
	LP	A08	A08_67484013	67484013	G	C	5.76015e-09
	LP	A08	A08_68424920	68424920	G	A	7.86652e-08
	LP	A08	A08_68436092	68436092	C	T	4.47792e-10
	LP	A08	A08_68581546	68581546	C	A	2.79194e-09
	LP	A08	A08_68997126	68997126	A	G	3.65498e-08
	LP	A08	A08_69688082	69688082	A	G	3.7948e-07
	LP	A08	A08_69709473	69709473	T	C	2.17132e-09
	LP	A08	A08_69746105	69746105	T	C	2.20901e-13
	LP	A08	A08_69936138	69936138	T	A	1.05831e-07
	LP	A08	A08_70324661	70324661	A	C	8.65911e-09
	LP	A08	A08_70324690	70324690	T	C	1.08101e-08
	LP	A08	A08_70430520	70430520	C	A	1.4491e-08
	LP	A08	A08_70608484	70608484	G	A	4.12292e-07
	LP	A08	A08_70879470	70879470	G	A	4.46674e-09
	LP	A08	A08_72044831	72044831	G	A	2.87507e-08
	LP	A08	A08_72218365	72218365	C	T	1.97861e-07
	LP	A08	A08_72218376	72218376	C	G	2.07613e-07
	LP	A08	A08_72230011	72230011	T	G	1.35663e-07
	LP	A08	A08_72634233	72634233	T	C	1.45501e-07
	LP	A08	A08_73089382	73089382	T	C	6.71554e-08
	LP	A08	A08_73160104	73160104	G	A	4.9295e-08
	LP	A08	A08_73510022	73510022	C	T	1.87105e-07
	LP	A08	A08_73663375	73663375	T	C	1.99691e-07
	LP	A08	A08_73876246	73876246	C	G	5.91762e-08
	LP	A08	A08_74518480	74518480	G	A	5.53924e-08
	LP	A08	A08_74587140	74587140	A	G	1.31331e-08
	LP	A08	A08_74587216	74587216	A	G	3.88964e-09
	LP	A08	A08_74997773	74997773	A	C	3.18242e-10
	LP	A08	A08_75176208	75176208	T	C	3.29726e-09
	LP	A08	A08_75669114	75669114	G	A	4.16955e-07
	LP	A08	A08_76449635	76449635	T	C	1.62095e-08
	LP	A08	A08_78149752	78149752	C	T	1.53098e-07
	LP	A12	A12_91871714	91871714	T	C	2.04476e-07
	LP	A12	A12_95672342	95672342	T	C	7.89951e-07
	LP	D02	D02_5838329	5838329	A	C	5.3345e-07
	LP	D02	D02_5839655	5839655	A	G	1.26226e-07
	LP	D02	D02_5840189	5840189	A	G	2.74081e-07
	LP	D02	D02_5855371	5855371	A	G	2.96232e-07
	LP	D02	D02_5855415	5855415	C	A	8.79694e-07
	LP	D02	D02_5881539	5881539	A	G	9.48014e-07
	LP	D02	D02_5889773	5889773	C	T	6.47338e-07
	LP	D11	D11_31913600	31913600	T	C	8.63085e-07
	LP	D11	D11_31951689	31951689	C	T	8.14987e-07
	LP	D11	D11_32025771	32025771	C	T	2.42086e-07
	LU	A06	A06_976817	976817	T	G	9.26372e-09
	LU	D05	D05_26331235	26331235	C	T	3.81995e-07
	LU	D07	D07_27620097	27620097	G	A	1.50833e-07
	LU	D13	D13_56984124	56984124	G	A	2.78089e-08
	M	A07	A07_1170221	1170221	T	G	2.8112e-07
	M	A07	A07_1170739	1170739	G	T	2.89036e-07
	M	A08	A08_123789289	123789289	T	C	9.94324e-08
	M	D02	D02_5549226	5549226	C	G	4.0004e-07
	M	D02	D02_5854259	5854259	T	A	3.92901e-07
	SBno	D12	D12_44273423	44273423	C	A	1.22152e-08
	SBno	D12	D12_44695554	44695554	A	G	1.83582e-09
	SBnode	D10	D10_62144629	62144629	A	G	8.81425e-07

## Sheet: special PP-SNPs
Supplementary Table 12. The specific PP-SNPs associated with traits of 419 upland cotton using phenotypic plasticity parameter for GWAS
Triats category	Traits	Chromosome	Maker	Position (bp)	allele1	allele0	P-value
Fiber quality related-traits	LU	A11	A11_111661594	111661594	T	C	4.72981e-07
Fiber yield related-traits	BPP	D01	D01_2087995	2087995	T	G	8.3151e-08
	BPP	D01	D01_2088312	2088312	A	G	2.36512e-07
	BPP	D01	D01_2092684	2092684	T	C	5.58889e-07
	BPP	D01	D01_2098412	2098412	G	A	1.35573e-07
	BPP	D01	D01_2099134	2099134	C	A	4.32838e-08
	BPP	D01	D01_2109122	2109122	G	C	4.15052e-08
	BPP	D01	D01_2117251	2117251	A	G	1.68125e-07
	BPP	D01	D01_2127919	2127919	T	C	6.91637e-08
	BPP	D01	D01_2128656	2128656	C	T	1.6969e-07
	BPP	D01	D01_2135551	2135551	C	T	3.12334e-07
	BW	D04	D04_4373892	4373892	C	T	8.76189e-07
Growth period related-traits	GP	A07	A07_9075577	9075577	A	G	7.07832e-07
	GP	D11	D11_22356555	22356555	A	C	6.48532e-07
	GP	D11	D11_22497919	22497919	T	C	9.33831e-07

## Sheet: special EvA-SNPs
Supplementary Table 12. The specific EvA-SNPs associated with traits of 419 upland cotton using environmental adaptation parameters for GWAS
Triats category	Traits	Chromosome	Maker	Position (bp)	allele1	allele0	P-value
Fiber quality related-traits	FL	A01	A01_98739746	98739746	T	C	7.22208e-08
	FL	A02	A02_12653371	12653371	G	A	6.16197e-07
	FL	A02	A02_12820339	12820339	C	T	5.77155e-07
	FL	A02	A02_12836911	12836911	C	T	8.61888e-07
	FL	A02	A02_12900289	12900289	C	T	7.25175e-07
	FL	A02	A02_13442883	13442883	G	T	1.15584e-07
	FL	A02	A02_13940936	13940936	C	G	6.52093e-07
	FL	A02	A02_13987143	13987143	G	A	8.08975e-07
	FL	A02	A02_51915277	51915277	G	A	3.62867e-11
	FL	A02	A02_52585952	52585952	T	C	1.05675e-09
	FL	A02	A02_63576858	63576858	C	T	3.94377e-07
	FL	A02	A02_97261412	97261412	C	T	4.54059e-07
	FL	A02	A02_97264783	97264783	T	G	6.44427e-07
	FL	A02	A02_97264958	97264958	C	T	3.43803e-07
	FL	A02	A02_97264964	97264964	C	T	3.61661e-07
	FL	A02	A02_97265014	97265014	A	G	6.02544e-07
	FL	A02	A02_97265055	97265055	G	A	6.14889e-07
	FL	A02	A02_97265584	97265584	C	T	7.23515e-07
	FL	A02	A02_97267055	97267055	G	A	1.23309e-07
	FL	A02	A02_97267072	97267072	A	G	1.51806e-07
	FL	A02	A02_97267140	97267140	A	C	3.14816e-07
	FL	A02	A02_97269852	97269852	T	A	9.99306e-07
	FL	A02	A02_97403001	97403001	C	T	8.8426e-07
	FL	A02	A02_97409714	97409714	C	T	1.09425e-07
	FL	A02	A02_97416232	97416232	G	A	3.68681e-07
	FL	A02	A02_97417867	97417867	C	A	9.61031e-07
	FL	A02	A02_97417910	97417910	C	A	6.21681e-07
	FL	A02	A02_97438896	97438896	A	G	7.46296e-07
	FL	A02	A02_97532523	97532523	A	G	6.8293e-07
	FL	A02	A02_98273500	98273500	A	C	6.63264e-07
	FL	A02	A02_100825679	100825679	T	C	8.19032e-08
	FL	A02	A02_100832983	100832983	T	G	9.18319e-08
	FL	A02	A02_100834987	100834987	T	A	7.37866e-07
	FL	A02	A02_100838551	100838551	C	A	1.935e-08
	FL	A02	A02_100840657	100840657	C	T	5.58849e-08
	FL	A02	A02_100841436	100841436	A	G	3.19949e-07
	FL	A02	A02_100843660	100843660	G	A	7.4234e-08
	FL	A02	A02_100845374	100845374	T	C	1.09678e-08
	FL	A02	A02_100846248	100846248	T	A	9.79194e-08
	FL	A02	A02_100858636	100858636	G	A	1.78751e-08
	FL	A02	A02_100859508	100859508	C	T	3.56813e-09
	FL	A02	A02_100859616	100859616	C	T	4.27061e-08
	FL	A02	A02_100859929	100859929	G	A	4.49655e-08
	FL	A02	A02_100859984	100859984	G	T	1.18115e-07
	FL	A02	A02_100860251	100860251	T	C	3.54436e-08
	FL	A02	A02_100860313	100860313	A	C	6.94176e-08
	FL	A02	A02_100860382	100860382	A	C	3.69361e-09
	FL	A02	A02_100861404	100861404	G	A	5.94333e-07
	FL	A02	A02_100861430	100861430	A	T	1.51573e-08
	FL	A02	A02_100863539	100863539	G	A	5.2277e-08
	FL	A02	A02_100864543	100864543	A	G	1.31541e-07
	FL	A02	A02_100866569	100866569	G	A	6.03439e-08
	FL	A02	A02_100866667	100866667	T	C	8.37907e-08
	FL	A02	A02_100866880	100866880	T	A	8.65034e-08
	FL	A02	A02_100867083	100867083	C	T	1.02947e-08
	FL	A02	A02_100867311	100867311	G	C	1.19014e-07
	FL	A02	A02_100867656	100867656	T	C	7.90443e-07
	FL	A02	A02_100868486	100868486	A	T	1.20828e-07
	FL	A02	A02_100869537	100869537	G	A	3.15058e-08
	FL	A02	A02_100870048	100870048	G	A	1.38998e-08
	FL	A02	A02_100870159	100870159	A	G	1.46438e-09
	FL	A02	A02_100870190	100870190	C	T	1.54904e-07
	FL	A02	A02_100870394	100870394	C	A	5.25807e-08
	FL	A02	A02_100870406	100870406	C	A	3.02305e-08
	FL	A02	A02_100870588	100870588	C	T	4.39785e-07
	FL	A02	A02_100870700	100870700	C	A	3.19705e-08
	FL	A02	A02_100870775	100870775	T	C	4.76888e-08
	FL	A02	A02_100870783	100870783	T	C	4.31333e-08
	FL	A02	A02_100870998	100870998	G	T	3.83739e-07
	FL	A02	A02_100871022	100871022	C	T	1.41381e-07
	FL	A02	A02_100871270	100871270	G	A	1.39868e-07
	FL	A02	A02_100871400	100871400	G	A	2.12818e-07
	FL	A02	A02_100872824	100872824	G	T	3.4152e-08
	FL	A02	A02_100873108	100873108	A	T	5.87629e-10
	FL	A02	A02_100873162	100873162	C	A	1.16103e-07
	FL	A02	A02_100873262	100873262	G	A	5.06834e-08
	FL	A02	A02_100873293	100873293	G	A	4.26427e-08
	FL	A02	A02_100874052	100874052	C	T	1.86801e-07
	FL	A02	A02_100874593	100874593	C	T	4.59512e-07
	FL	A02	A02_100875561	100875561	G	A	1.83095e-07
	FL	A02	A02_100875564	100875564	G	T	1.89216e-07
	FL	A02	A02_100875582	100875582	G	A	1.53827e-07
	FL	A02	A02_100875593	100875593	T	C	1.55705e-07
	FL	A02	A02_100878992	100878992	A	C	1.20393e-07
	FL	A02	A02_100879098	100879098	C	T	2.61137e-07
	FL	A02	A02_100881321	100881321	A	G	1.57043e-07
	FL	A02	A02_100881719	100881719	T	C	1.85092e-07
	FL	A02	A02_100884061	100884061	T	C	2.59657e-08
	FL	A02	A02_100884090	100884090	G	A	1.21104e-08
	FL	A02	A02_100884371	100884371	G	T	6.31672e-08
	FL	A02	A02_100884379	100884379	A	G	6.38055e-08
	FL	A02	A02_100885871	100885871	G	A	1.52517e-07
	FL	A02	A02_100885939	100885939	G	A	7.8552e-08
	FL	A02	A02_100886073	100886073	C	A	1.34989e-07
	FL	A02	A02_100886801	100886801	C	A	7.25938e-08
	FL	A02	A02_100891633	100891633	G	A	3.01607e-08
	FL	A02	A02_100892603	100892603	A	T	9.48164e-07
	FL	A02	A02_100901874	100901874	T	A	1.08716e-07
	FL	A02	A02_100903188	100903188	C	T	7.2682e-08
	FL	A02	A02_100903327	100903327	G	A	2.6409e-08
	FL	A02	A02_100903344	100903344	G	A	3.12354e-08
	FL	A02	A02_100906393	100906393	C	T	4.30954e-08
	FL	A02	A02_100915504	100915504	G	A	3.18281e-08
	FL	A02	A02_100915627	100915627	G	T	1.99441e-09
	FL	A02	A02_100917940	100917940	C	T	4.62559e-08
	FL	A02	A02_100918618	100918618	G	A	2.17256e-07
	FL	A02	A02_100918630	100918630	C	T	1.73659e-07
	FL	A03	A03_50730691	50730691	T	G	1.67463e-08
	FL	A03	A03_59490221	59490221	A	T	3.36882e-07
	FL	A03	A03_64899656	64899656	A	G	4.83807e-07
	FL	A03	A03_65265567	65265567	T	C	2.07856e-07
	FL	A03	A03_65356453	65356453	T	C	2.51337e-07
	FL	A03	A03_65359297	65359297	G	A	4.24172e-07
	FL	A03	A03_65385759	65385759	A	G	4.27218e-07
	FL	A03	A03_65390006	65390006	A	G	2.05491e-08
	FL	A03	A03_65398478	65398478	T	C	6.47456e-08
	FL	A03	A03_65400653	65400653	T	C	4.0978e-09
	FL	A03	A03_65431346	65431346	A	G	3.53802e-07
	FL	A03	A03_65452219	65452219	G	A	1.90954e-07
	FL	A03	A03_105379532	105379532	C	T	9.7136e-07
	FL	A03	A03_105465642	105465642	A	C	9.25558e-07
	FL	A03	A03_105466147	105466147	T	C	6.5754e-07
	FL	A03	A03_105470622	105470622	T	C	4.32386e-07
	FL	A03	A03_105503136	105503136	T	C	5.80042e-07
	FL	A03	A03_105507012	105507012	T	C	3.19537e-07
	FL	A03	A03_105548470	105548470	A	G	5.7864e-07
	FL	A03	A03_109007119	109007119	A	G	2.00534e-08
	FL	A04	A04_2248273	2248273	G	A	1.7349e-07
	FL	A05	A05_38637026	38637026	T	C	7.97387e-07
	FL	A05	A05_38702232	38702232	T	C	5.6769e-08
	FL	A05	A05_38714100	38714100	A	G	5.12096e-07
	FL	A06	A06_38852225	38852225	T	G	7.1315e-07
	FL	A06	A06_125008873	125008873	A	G	2.24513e-07
	FL	A08	A08_25558910	25558910	T	C	5.44124e-08
	FL	A08	A08_31574710	31574710	A	C	8.92961e-08
	FL	A08	A08_43823479	43823479	G	A	1.55082e-09
	FL	A08	A08_45920919	45920919	G	A	7.92513e-07
	FL	A08	A08_46824786	46824786	C	T	1.06302e-08
	FL	A08	A08_51757754	51757754	G	A	9.15821e-11
	FL	A08	A08_55665113	55665113	A	G	1.21635e-07
	FL	A08	A08_59283861	59283861	G	A	2.9933e-09
	FL	A08	A08_67179079	67179079	G	T	8.17856e-07
	FL	A08	A08_68424692	68424692	G	A	2.73918e-07
	FL	A08	A08_73914082	73914082	T	C	9.2499e-07
	FL	A09	A09_10374754	10374754	A	G	9.44809e-07
	FL	A09	A09_10459159	10459159	A	T	1.48087e-07
	FL	A09	A09_10472174	10472174	A	G	1.53449e-07
	FL	A10	A10_112496204	112496204	G	A	9.14328e-07
	FL	A11	A11_91168950	91168950	C	T	8.608e-07
	FL	A11	A11_91173925	91173925	C	T	3.84849e-07
	FL	A11	A11_91174107	91174107	G	T	5.02705e-08
	FL	A11	A11_91214063	91214063	C	T	1.1479e-07
	FL	A11	A11_91460578	91460578	G	A	1.59489e-07
	FL	A11	A11_91515652	91515652	T	G	3.63794e-07
	FL	A11	A11_91584918	91584918	T	C	6.17913e-07
	FL	A11	A11_91649026	91649026	A	T	9.50657e-07
	FL	A11	A11_91669824	91669824	A	G	6.49749e-07
	FL	A11	A11_91674870	91674870	T	C	1.41401e-07
	FL	A11	A11_91693373	91693373	A	C	1.63217e-07
	FL	A11	A11_91717447	91717447	T	G	4.67356e-07
	FL	A11	A11_91717465	91717465	T	C	5.56225e-07
	FL	A11	A11_91796336	91796336	A	G	7.46835e-07
	FL	A11	A11_91833657	91833657	C	T	5.35277e-07
	FL	A11	A11_91833760	91833760	A	T	2.12332e-07
	FL	A11	A11_91847583	91847583	A	G	5.78365e-07
	FL	A11	A11_91988574	91988574	A	T	7.57863e-07
	FL	A11	A11_92004474	92004474	A	C	7.92547e-07
	FL	A11	A11_92070380	92070380	A	G	5.20576e-07
	FL	A11	A11_92159496	92159496	A	G	5.86386e-07
	FL	A11	A11_92322236	92322236	T	C	1.22094e-07
	FL	A11	A11_92332175	92332175	A	G	5.25865e-07
	FL	A11	A11_92354935	92354935	C	T	5.28308e-07
	FL	A11	A11_92641661	92641661	C	T	3.43632e-07
	FL	A11	A11_92641679	92641679	C	T	3.9352e-07
	FL	A11	A11_92651623	92651623	C	G	3.15739e-07
	FL	A11	A11_92651638	92651638	T	C	4.88835e-07
	FL	A11	A11_92685646	92685646	C	A	5.77548e-07
	FL	A11	A11_92738556	92738556	A	G	4.30688e-07
	FL	A11	A11_92826907	92826907	T	C	8.42132e-07
	FL	A11	A11_92972019	92972019	G	T	6.43064e-07
	FL	A11	A11_92975388	92975388	T	C	7.51026e-07
	FL	A11	A11_92979350	92979350	A	G	8.25133e-08
	FL	A11	A11_98529925	98529925	A	G	3.18856e-07
	FL	A11	A11_100322809	100322809	C	T	2.48597e-07
	FL	A11	A11_106639820	106639820	G	A	5.50161e-07
	FL	A11	A11_106654355	106654355	C	A	3.24995e-07
	FL	A11	A11_106654356	106654356	A	T	3.24995e-07
	FL	A11	A11_106655452	106655452	A	G	3.34049e-07
	FL	A11	A11_106660130	106660130	G	A	4.20611e-07
	FL	A11	A11_106672285	106672285	C	T	5.54018e-07
	FL	A11	A11_106674833	106674833	C	T	3.72672e-07
	FL	A11	A11_106676355	106676355	G	A	3.97156e-07
	FL	A11	A11_106677495	106677495	C	A	3.90706e-07
	FL	A11	A11_106679281	106679281	T	A	2.61033e-07
	FL	A11	A11_106681957	106681957	T	G	2.88534e-07
	FL	A11	A11_106682042	106682042	C	T	3.42932e-08
	FL	A11	A11_106682388	106682388	C	T	1.78788e-07
	FL	A11	A11_106682983	106682983	C	T	8.7652e-07
	FL	A11	A11_106683141	106683141	C	T	4.23854e-07
	FL	A11	A11_106684735	106684735	T	A	3.33593e-07
	FL	A11	A11_106688864	106688864	G	A	1.53155e-07
	FL	A11	A11_106689697	106689697	C	T	4.96592e-07
	FL	A11	A11_106689713	106689713	G	A	6.19462e-07
	FL	A11	A11_106690041	106690041	C	T	1.00401e-07
	FL	A11	A11_106694016	106694016	G	A	3.708e-08
	FL	A11	A11_106695359	106695359	G	A	2.61735e-07
	FL	A11	A11_106698063	106698063	G	T	2.92601e-07
	FL	A11	A11_106698149	106698149	C	T	7.71412e-07
	FL	A11	A11_106700502	106700502	A	G	8.46765e-07
	FL	A11	A11_106700648	106700648	T	A	6.71472e-07
	FL	A11	A11_106701019	106701019	C	T	8.50037e-07
	FL	A11	A11_106701142	106701142	C	T	1.82245e-07
	FL	A11	A11_106701159	106701159	C	T	1.83729e-07
	FL	A11	A11_106701298	106701298	C	A	2.71938e-07
	FL	A11	A11_106703169	106703169	C	T	4.16808e-07
	FL	A11	A11_106703628	106703628	G	A	1.82014e-07
	FL	A11	A11_106705229	106705229	T	A	6.52906e-08
	FL	A11	A11_106705399	106705399	G	A	3.70562e-08
	FL	A11	A11_106711630	106711630	C	G	1.4038e-07
	FL	A11	A11_106721083	106721083	G	A	5.25538e-07
	FL	A11	A11_106721106	106721106	G	A	6.59359e-07
	FL	A11	A11_106721155	106721155	C	G	4.98899e-07
	FL	A12	A12_105267497	105267497	G	C	7.05603e-07
	FL	A12	A12_105693730	105693730	C	T	1.57194e-07
	FL	D01	D01_467408	467408	A	G	7.3122e-07
	FL	D01	D01_664383	664383	T	C	2.39581e-07
	FL	D01	D01_668766	668766	C	T	8.81442e-07
	FL	D01	D01_670672	670672	A	G	8.32842e-07
	FL	D01	D01_671480	671480	A	T	2.09349e-07
	FL	D01	D01_14998944	14998944	C	T	2.63005e-07
	FL	D02	D02_4193423	4193423	G	C	3.92855e-08
	FL	D02	D02_4273014	4273014	A	G	3.20534e-07
	FL	D02	D02_4416163	4416163	A	C	9.04959e-07
	FL	D02	D02_4426636	4426636	T	C	9.17714e-07
	FL	D02	D02_10196003	10196003	G	A	3.27131e-07
	FL	D03	D03_46908389	46908389	C	T	5.17862e-08
	FL	D03	D03_46927695	46927695	A	G	7.54952e-07
	FL	D04	D04_3596837	3596837	T	C	7.03044e-08
	FL	D04	D04_16287237	16287237	A	G	4.78531e-07
	FL	D04	D04_54072466	54072466	A	C	9.15036e-07
	FL	D05	D05_2481662	2481662	G	C	3.18787e-07
	FL	D05	D05_2481703	2481703	T	A	3.69954e-07
	FL	D05	D05_2481770	2481770	A	G	7.52564e-09
	FL	D05	D05_2482933	2482933	G	T	7.83895e-08
	FL	D05	D05_2483079	2483079	C	T	6.12011e-08
	FL	D05	D05_2552342	2552342	T	C	4.86854e-08
	FL	D05	D05_2560155	2560155	T	C	3.6753e-08
	FL	D05	D05_8481314	8481314	T	C	1.00398e-07
	FL	D05	D05_8943365	8943365	T	C	4.39829e-08
	FL	D05	D05_19487031	19487031	G	T	2.73822e-10
	FL	D05	D05_26905822	26905822	C	T	5.74581e-07
	FL	D05	D05_26945137	26945137	T	C	4.65352e-07
	FL	D05	D05_26956471	26956471	C	A	1.42572e-07
	FL	D05	D05_27335607	27335607	C	T	4.80622e-08
	FL	D05	D05_30007173	30007173	A	T	7.7791e-07
	FL	D05	D05_30007174	30007174	T	C	7.7791e-07
	FL	D05	D05_30011017	30011017	A	G	9.93235e-07
	FL	D05	D05_30018817	30018817	A	G	9.35431e-07
	FL	D05	D05_30020862	30020862	A	G	5.49862e-07
	FL	D05	D05_30049270	30049270	T	G	7.94883e-07
	FL	D05	D05_30059858	30059858	A	G	7.18644e-07
	FL	D05	D05_30082006	30082006	T	C	4.97874e-07
	FL	D05	D05_30099547	30099547	T	G	9.4512e-07
	FL	D05	D05_30161571	30161571	G	C	5.41213e-07
	FL	D05	D05_30176799	30176799	T	C	2.2927e-08
	FL	D05	D05_30178603	30178603	A	G	2.37643e-07
	FL	D05	D05_30196706	30196706	C	G	8.03112e-07
	FL	D06	D06_399786	399786	T	C	8.88752e-08
	FL	D06	D06_417788	417788	A	G	4.02512e-07
	FL	D06	D06_420170	420170	G	C	3.44392e-07
	FL	D06	D06_430969	430969	C	A	1.44126e-07
	FL	D06	D06_431022	431022	C	T	1.28048e-07
	FL	D06	D06_431024	431024	C	T	1.28048e-07
	FL	D06	D06_431360	431360	C	T	7.09439e-08
	FL	D06	D06_432303	432303	G	A	1.36452e-07
	FL	D06	D06_432359	432359	C	T	9.09865e-08
	FL	D06	D06_432429	432429	C	T	5.00475e-08
	FL	D06	D06_432451	432451	C	T	5.22085e-08
	FL	D06	D06_432567	432567	C	A	1.26057e-07
	FL	D06	D06_433591	433591	G	A	2.07407e-07
	FL	D06	D06_433619	433619	G	A	2.17793e-07
	FL	D06	D06_434023	434023	G	A	4.29893e-07
	FL	D06	D06_434039	434039	C	T	2.85697e-07
	FL	D06	D06_434152	434152	G	A	3.49228e-07
	FL	D06	D06_434326	434326	G	T	5.27618e-08
	FL	D06	D06_454576	454576	G	A	1.57073e-07
	FL	D06	D06_463102	463102	A	G	2.50032e-07
	FL	D06	D06_463110	463110	G	T	2.23132e-07
	FL	D06	D06_467341	467341	T	C	4.98646e-07
	FL	D06	D06_7873884	7873884	A	G	1.30216e-08
	FL	D06	D06_7874131	7874131	A	G	3.87305e-07
	FL	D06	D06_7874171	7874171	A	G	2.39623e-07
	FL	D06	D06_7874226	7874226	C	T	5.81561e-07
	FL	D06	D06_7874323	7874323	G	A	3.32494e-07
	FL	D06	D06_7874450	7874450	G	A	1.02245e-07
	FL	D06	D06_7874538	7874538	G	A	1.20078e-07
	FL	D06	D06_7874580	7874580	C	G	2.07794e-07
	FL	D06	D06_7874777	7874777	T	A	6.76201e-08
	FL	D06	D06_7874817	7874817	T	G	3.32637e-07
	FL	D06	D06_7875008	7875008	G	A	4.66557e-07
	FL	D06	D06_7875072	7875072	T	C	2.98461e-09
	FL	D06	D06_7875109	7875109	G	A	2.33155e-08
	FL	D06	D06_7875209	7875209	C	G	2.39781e-08
	FL	D06	D06_7875241	7875241	A	G	3.12051e-08
	FL	D06	D06_7875306	7875306	T	G	2.7779e-08
	FL	D06	D06_7875335	7875335	C	T	1.70171e-08
	FL	D06	D06_7875589	7875589	A	C	5.52134e-07
	FL	D06	D06_7875694	7875694	T	C	7.75271e-07
	FL	D06	D06_7875930	7875930	T	C	4.95525e-08
	FL	D06	D06_7875997	7875997	A	C	2.88864e-08
	FL	D06	D06_7876006	7876006	G	C	7.63324e-08
	FL	D06	D06_7876069	7876069	C	T	5.85719e-08
	FL	D06	D06_7876092	7876092	G	A	7.48068e-07
	FL	D06	D06_7876102	7876102	A	G	6.58126e-07
	FL	D06	D06_7876196	7876196	T	C	3.11395e-07
	FL	D06	D06_7876274	7876274	G	A	5.02863e-07
	FL	D06	D06_7876295	7876295	T	C	4.84226e-07
	FL	D06	D06_7876411	7876411	T	C	1.28846e-07
	FL	D06	D06_7876473	7876473	C	T	2.60318e-08
	FL	D06	D06_7876667	7876667	T	C	1.92887e-08
	FL	D06	D06_7876746	7876746	C	T	7.5616e-08
	FL	D06	D06_7876787	7876787	A	G	4.10554e-08
	FL	D06	D06_7876796	7876796	A	G	4.07003e-08
	FL	D06	D06_7876824	7876824	G	A	1.06764e-08
	FL	D06	D06_7876872	7876872	A	G	1.22846e-08
	FL	D06	D06_7876919	7876919	A	G	1.20666e-08
	FL	D06	D06_7876930	7876930	A	G	1.41684e-08
	FL	D06	D06_7877032	7877032	T	C	2.60065e-08
	FL	D06	D06_7877369	7877369	C	T	3.6124e-07
	FL	D06	D06_7877511	7877511	G	A	6.20433e-07
	FL	D06	D06_7877517	7877517	C	A	5.43196e-07
	FL	D06	D06_7877569	7877569	A	T	3.07575e-07
	FL	D06	D06_7877921	7877921	G	A	7.25699e-08
	FL	D06	D06_7878114	7878114	C	T	4.69568e-10
	FL	D06	D06_7878297	7878297	C	T	2.788e-08
	FL	D06	D06_7878608	7878608	A	G	1.53854e-08
	FL	D06	D06_7878755	7878755	G	A	8.12577e-07
	FL	D06	D06_7878824	7878824	T	C	1.36333e-07
	FL	D06	D06_7879014	7879014	G	A	1.41606e-07
	FL	D06	D06_7879036	7879036	A	G	3.12267e-08
	FL	D06	D06_7879082	7879082	A	G	5.03059e-08
	FL	D06	D06_7879138	7879138	G	A	3.08953e-07
	FL	D06	D06_7879238	7879238	A	T	1.58346e-08
	FL	D06	D06_7879319	7879319	A	G	2.195e-08
	FL	D06	D06_7879355	7879355	A	G	7.11065e-08
	FL	D06	D06_7879720	7879720	A	G	3.49037e-07
	FL	D06	D06_7879782	7879782	G	A	7.37698e-08
	FL	D06	D06_7880017	7880017	T	C	4.47589e-08
	FL	D06	D06_7880068	7880068	G	A	7.89468e-08
	FL	D06	D06_7880091	7880091	T	C	3.06998e-08
	FL	D06	D06_7880251	7880251	C	T	7.2433e-08
	FL	D06	D06_7880277	7880277	A	T	3.64499e-08
	FL	D06	D06_7880287	7880287	G	A	4.00195e-08
	FL	D06	D06_7880411	7880411	G	T	6.55871e-08
	FL	D06	D06_7880426	7880426	A	G	1.17208e-08
	FL	D06	D06_7880447	7880447	A	C	1.21045e-08
	FL	D06	D06_7880763	7880763	T	C	9.88318e-09
	FL	D06	D06_7880826	7880826	G	A	1.6855e-08
	FL	D06	D06_7880921	7880921	G	T	1.5438e-08
	FL	D06	D06_7881073	7881073	A	G	4.96626e-07
	FL	D06	D06_7881230	7881230	C	T	3.45353e-07
	FL	D06	D06_7881283	7881283	T	C	2.13913e-07
	FL	D06	D06_7881320	7881320	T	C	4.47443e-07
	FL	D06	D06_7881350	7881350	C	T	1.64349e-07
	FL	D06	D06_7881408	7881408	T	C	6.00473e-07
	FL	D06	D06_7881556	7881556	A	G	1.20677e-07
	FL	D06	D06_7881562	7881562	G	T	1.28903e-07
	FL	D06	D06_7881766	7881766	C	A	5.11795e-08
	FL	D06	D06_7881832	7881832	A	G	3.83418e-08
	FL	D06	D06_7881879	7881879	T	C	2.97013e-08
	FL	D06	D06_7881906	7881906	G	A	2.36118e-07
	FL	D06	D06_7881998	7881998	C	T	2.55362e-07
	FL	D06	D06_7882158	7882158	C	T	4.49931e-08
	FL	D06	D06_7882301	7882301	C	T	3.23966e-07
	FL	D06	D06_7882311	7882311	T	C	4.9958e-08
	FL	D06	D06_7882489	7882489	G	A	6.33471e-08
	FL	D06	D06_7882490	7882490	T	C	4.09645e-08
	FL	D06	D06_7882514	7882514	T	A	1.88026e-08
	FL	D06	D06_7882530	7882530	T	C	2.04965e-08
	FL	D06	D06_7882571	7882571	A	G	1.29137e-08
	FL	D06	D06_7882969	7882969	G	A	8.69705e-07
	FL	D06	D06_7882973	7882973	T	C	8.85238e-07
	FL	D06	D06_7882981	7882981	G	A	8.82448e-08
	FL	D06	D06_7883076	7883076	C	G	3.4698e-08
	FL	D06	D06_7883255	7883255	A	C	3.27176e-07
	FL	D06	D06_7883270	7883270	T	C	7.61396e-07
	FL	D06	D06_7883320	7883320	C	T	4.52207e-08
	FL	D06	D06_7883409	7883409	A	G	3.32084e-08
	FL	D06	D06_7883463	7883463	A	G	5.23963e-08
	FL	D06	D06_7883611	7883611	A	G	1.84458e-08
	FL	D06	D06_7883674	7883674	A	G	8.00747e-09
	FL	D06	D06_7883789	7883789	C	A	7.71744e-07
	FL	D06	D06_7883864	7883864	A	G	3.93733e-09
	FL	D06	D06_7884256	7884256	C	G	3.94605e-08
	FL	D06	D06_7884722	7884722	T	C	2.57288e-08
	FL	D06	D06_7884786	7884786	T	C	3.02649e-08
	FL	D06	D06_7884796	7884796	T	A	2.69106e-08
	FL	D06	D06_7888500	7888500	A	G	2.88312e-08
	FL	D06	D06_7888512	7888512	C	T	1.46049e-07
	FL	D06	D06_7888654	7888654	T	C	1.83617e-08
	FL	D06	D06_7888898	7888898	A	G	5.56237e-08
	FL	D06	D06_7889096	7889096	G	A	5.93156e-08
	FL	D06	D06_7889109	7889109	C	A	2.59202e-07
	FL	D06	D06_7889127	7889127	G	A	5.72852e-07
	FL	D06	D06_7889276	7889276	A	G	4.51652e-08
	FL	D06	D06_7889323	7889323	A	G	3.95039e-10
	FL	D06	D06_7889491	7889491	T	C	3.9197e-07
	FL	D06	D06_7889570	7889570	C	T	2.58076e-08
	FL	D06	D06_7891067	7891067	A	G	8.57027e-09
	FL	D06	D06_7892357	7892357	T	G	7.84554e-08
	FL	D06	D06_7893037	7893037	A	G	5.45918e-10
	FL	D06	D06_7893096	7893096	A	G	5.81588e-09
	FL	D06	D06_7893201	7893201	T	C	4.75483e-08
	FL	D06	D06_7893228	7893228	G	A	7.00897e-08
	FL	D06	D06_7893399	7893399	C	T	8.01445e-08
	FL	D06	D06_7893448	7893448	A	G	2.3584e-07
	FL	D06	D06_7893480	7893480	A	G	6.86617e-09
	FL	D06	D06_7893494	7893494	C	T	2.47646e-08
	FL	D06	D06_7893902	7893902	T	C	1.20238e-08
	FL	D06	D06_7893942	7893942	G	A	1.54426e-08
	FL	D06	D06_7894044	7894044	T	C	1.98305e-09
	FL	D06	D06_7894093	7894093	A	G	2.8973e-08
	FL	D06	D06_7894673	7894673	C	T	2.58094e-08
	FL	D06	D06_7899022	7899022	T	C	8.98089e-08
	FL	D06	D06_7899124	7899124	A	C	2.59303e-08
	FL	D06	D06_7899200	7899200	C	T	9.61376e-09
	FL	D06	D06_7899535	7899535	A	T	4.24293e-07
	FL	D06	D06_7899547	7899547	C	G	8.62619e-08
	FL	D06	D06_7899844	7899844	A	G	2.16444e-08
	FL	D06	D06_7900104	7900104	G	C	7.62849e-08
	FL	D06	D06_7900431	7900431	C	T	6.90552e-08
	FL	D06	D06_7900521	7900521	C	T	1.53434e-07
	FL	D06	D06_7900528	7900528	T	G	3.38648e-08
	FL	D06	D06_7900538	7900538	C	T	1.05573e-07
	FL	D06	D06_7900606	7900606	C	T	1.34964e-07
	FL	D06	D06_7900639	7900639	T	G	6.48384e-09
	FL	D06	D06_7900728	7900728	G	A	1.95125e-07
	FL	D06	D06_7900744	7900744	T	A	1.82033e-07
	FL	D06	D06_7900747	7900747	G	T	1.41072e-07
	FL	D06	D06_7900766	7900766	C	T	1.55504e-07
	FL	D06	D06_7900774	7900774	C	A	4.11483e-08
	FL	D06	D06_7900796	7900796	C	T	2.18549e-07
	FL	D06	D06_7901108	7901108	G	A	8.40231e-08
	FL	D06	D06_7901182	7901182	A	G	5.04418e-08
	FL	D06	D06_7901203	7901203	T	C	4.28336e-08
	FL	D06	D06_7901327	7901327	T	C	5.19907e-08
	FL	D06	D06_7901488	7901488	T	C	6.04284e-07
	FL	D06	D06_7901668	7901668	C	T	5.68246e-07
	FL	D06	D06_7901827	7901827	A	G	8.19307e-08
	FL	D06	D06_7902058	7902058	C	A	2.47345e-07
	FL	D06	D06_7902194	7902194	T	G	3.23292e-08
	FL	D06	D06_7908670	7908670	T	C	6.78785e-08
	FL	D06	D06_7912041	7912041	T	A	3.24828e-08
	FL	D06	D06_7913795	7913795	G	A	1.94001e-08
	FL	D06	D06_7914390	7914390	A	C	1.28774e-08
	FL	D06	D06_7914859	7914859	C	T	1.18377e-07
	FL	D06	D06_7914891	7914891	T	C	1.91866e-08
	FL	D06	D06_7914981	7914981	G	A	1.08888e-07
	FL	D06	D06_7915193	7915193	T	C	3.27222e-07
	FL	D06	D06_7915366	7915366	G	A	3.19035e-07
	FL	D06	D06_7915580	7915580	T	C	3.16848e-07
	FL	D06	D06_7915703	7915703	C	T	1.79501e-07
	FL	D06	D06_7917030	7917030	G	A	7.03014e-07
	FL	D06	D06_7917430	7917430	T	C	3.74274e-07
	FL	D06	D06_7917484	7917484	A	T	1.27236e-07
	FL	D06	D06_7922090	7922090	G	A	1.69836e-09
	FL	D06	D06_7922100	7922100	G	A	1.47208e-09
	FL	D06	D06_7924191	7924191	T	C	6.7491e-09
	FL	D06	D06_7924268	7924268	G	A	7.65095e-08
	FL	D06	D06_7924281	7924281	G	A	8.30315e-08
	FL	D06	D06_7924299	7924299	A	C	1.53312e-08
	FL	D06	D06_7924325	7924325	T	C	2.19592e-07
	FL	D06	D06_7924340	7924340	A	G	2.20904e-07
	FL	D06	D06_7924354	7924354	G	T	4.61804e-07
	FL	D06	D06_7924366	7924366	C	T	5.20513e-07
	FL	D06	D06_7924422	7924422	C	T	3.64873e-07
	FL	D06	D06_7924731	7924731	A	G	1.66323e-08
	FL	D06	D06_7924778	7924778	T	C	1.00655e-07
	FL	D06	D06_7924975	7924975	T	C	3.30647e-08
	FL	D06	D06_7925029	7925029	T	C	2.7802e-08
	FL	D06	D06_7925040	7925040	G	A	1.64286e-07
	FL	D06	D06_7925090	7925090	A	G	6.00398e-07
	FL	D06	D06_7925122	7925122	A	G	5.7621e-07
	FL	D06	D06_7925154	7925154	T	C	9.36713e-07
	FL	D06	D06_7925200	7925200	T	C	2.90668e-10
	FL	D06	D06_7925220	7925220	T	C	1.80718e-10
	FL	D06	D06_7925267	7925267	C	T	1.04206e-08
	FL	D06	D06_7925466	7925466	T	C	1.05685e-07
	FL	D06	D06_7925564	7925564	C	G	5.59709e-08
	FL	D06	D06_7925587	7925587	G	A	2.75852e-09
	FL	D06	D06_7925742	7925742	C	T	1.30304e-07
	FL	D06	D06_7925883	7925883	C	T	1.93314e-07
	FL	D06	D06_7926046	7926046	C	T	1.88474e-07
	FL	D06	D06_7926057	7926057	C	T	1.88474e-07
	FL	D06	D06_7926063	7926063	C	T	1.88474e-07
	FL	D06	D06_7926112	7926112	T	C	8.74021e-08
	FL	D06	D06_7926165	7926165	T	G	1.57552e-07
	FL	D06	D06_7926228	7926228	C	T	5.38073e-08
	FL	D06	D06_7926263	7926263	A	G	6.69705e-08
	FL	D06	D06_7926484	7926484	C	T	3.65522e-07
	FL	D06	D06_7926584	7926584	G	A	1.93643e-07
	FL	D06	D06_7926722	7926722	C	T	1.29343e-07
	FL	D06	D06_7926878	7926878	C	T	8.95306e-08
	FL	D06	D06_7926946	7926946	A	G	9.46984e-08
	FL	D06	D06_7927024	7927024	C	T	1.50526e-08
	FL	D06	D06_7927062	7927062	C	A	1.63796e-07
	FL	D06	D06_7927102	7927102	T	C	4.6395e-09
	FL	D06	D06_7927438	7927438	A	C	3.46032e-07
	FL	D06	D06_7927563	7927563	A	C	1.06267e-07
	FL	D06	D06_7927643	7927643	T	C	8.88706e-08
	FL	D06	D06_7928131	7928131	G	A	1.43926e-07
	FL	D06	D06_7928200	7928200	G	A	1.88769e-07
	FL	D06	D06_7928702	7928702	T	C	3.53263e-07
	FL	D06	D06_7928744	7928744	T	C	1.25385e-07
	FL	D06	D06_7928790	7928790	C	T	2.05374e-07
	FL	D06	D06_7928807	7928807	C	T	1.42777e-07
	FL	D06	D06_7929337	7929337	A	G	2.71443e-08
	FL	D06	D06_7929362	7929362	A	G	3.10672e-08
	FL	D06	D06_7929399	7929399	T	C	4.37986e-07
	FL	D06	D06_7929477	7929477	A	G	9.42488e-08
	FL	D06	D06_7929604	7929604	C	T	1.04607e-07
	FL	D06	D06_7929615	7929615	G	C	2.86623e-08
	FL	D06	D06_7929667	7929667	A	G	4.29209e-08
	FL	D06	D06_7929808	7929808	A	G	8.37758e-08
	FL	D06	D06_7929932	7929932	A	G	2.67685e-08
	FL	D06	D06_7930047	7930047	C	T	1.04335e-07
	FL	D06	D06_7930368	7930368	G	A	1.66151e-08
	FL	D06	D06_7930424	7930424	A	C	2.02331e-08
	FL	D06	D06_7930437	7930437	C	T	7.90823e-08
	FL	D06	D06_7930464	7930464	T	C	4.21753e-08
	FL	D06	D06_7930544	7930544	A	G	1.55468e-08
	FL	D06	D06_7930846	7930846	C	T	9.15902e-08
	FL	D06	D06_7930853	7930853	G	A	1.23274e-07
	FL	D06	D06_7930897	7930897	G	A	6.70902e-08
	FL	D06	D06_7930938	7930938	C	T	1.13922e-07
	FL	D06	D06_7930968	7930968	C	T	1.3308e-07
	FL	D06	D06_7931021	7931021	G	A	6.16768e-08
	FL	D06	D06_7931714	7931714	C	A	2.2422e-07
	FL	D06	D06_7931741	7931741	T	A	9.95551e-08
	FL	D06	D06_7932233	7932233	A	G	1.50308e-08
	FL	D06	D06_7932288	7932288	G	A	4.08668e-08
	FL	D06	D06_7932372	7932372	C	T	9.99905e-08
	FL	D06	D06_7932683	7932683	A	C	2.11803e-08
	FL	D06	D06_7932739	7932739	A	G	1.86814e-08
	FL	D06	D06_7932843	7932843	T	C	5.73314e-09
	FL	D06	D06_7932851	7932851	A	G	5.73314e-09
	FL	D06	D06_7932874	7932874	C	T	8.72624e-09
	FL	D06	D06_7933050	7933050	C	T	4.38939e-08
	FL	D06	D06_7933061	7933061	C	T	6.93562e-08
	FL	D06	D06_7933160	7933160	C	T	2.48475e-07
	FL	D06	D06_7933232	7933232	C	T	6.57626e-07
	FL	D06	D06_7933352	7933352	C	T	2.40612e-07
	FL	D06	D06_7933483	7933483	T	C	2.18186e-08
	FL	D06	D06_7933691	7933691	A	G	4.87173e-08
	FL	D06	D06_7933729	7933729	G	A	1.81568e-07
	FL	D06	D06_7933742	7933742	T	G	1.71329e-07
	FL	D06	D06_7934196	7934196	G	A	3.64579e-07
	FL	D06	D06_7934412	7934412	G	A	6.23022e-07
	FL	D06	D06_7934487	7934487	C	A	2.42744e-07
	FL	D06	D06_7934490	7934490	G	A	2.42744e-07
	FL	D06	D06_7934520	7934520	A	G	9.13063e-08
	FL	D06	D06_7934538	7934538	G	A	2.11436e-07
	FL	D06	D06_7934595	7934595	A	G	5.01288e-07
	FL	D06	D06_7934658	7934658	T	C	1.95109e-07
	FL	D06	D06_7934782	7934782	C	T	1.19183e-07
	FL	D06	D06_7934811	7934811	A	C	2.02016e-08
	FL	D06	D06_7935324	7935324	G	T	2.38805e-07
	FL	D06	D06_7935532	7935532	C	T	4.19777e-08
	FL	D06	D06_7935541	7935541	G	A	3.66812e-08
	FL	D06	D06_7935579	7935579	T	A	2.34149e-08
	FL	D06	D06_7935646	7935646	C	T	1.87022e-08
	FL	D06	D06_7935720	7935720	T	G	3.98617e-07
	FL	D06	D06_7935743	7935743	G	T	4.51549e-08
	FL	D06	D06_7935806	7935806	T	A	1.84832e-07
	FL	D06	D06_7935910	7935910	T	G	1.28692e-08
	FL	D06	D06_7935922	7935922	G	A	3.18852e-08
	FL	D06	D06_7935971	7935971	T	G	6.12159e-08
	FL	D06	D06_7935987	7935987	T	C	5.60799e-08
	FL	D06	D06_7936009	7936009	C	T	1.98677e-07
	FL	D06	D06_7936044	7936044	T	A	2.82934e-07
	FL	D06	D06_7936097	7936097	A	G	1.54502e-07
	FL	D06	D06_7936156	7936156	G	A	1.95238e-07
	FL	D06	D06_7936170	7936170	C	T	1.88335e-07
	FL	D06	D06_7936233	7936233	G	A	6.26409e-07
	FL	D06	D06_7936238	7936238	T	C	2.55624e-07
	FL	D06	D06_7936269	7936269	A	G	6.91649e-08
	FL	D06	D06_7936352	7936352	G	A	1.39253e-07
	FL	D06	D06_7936428	7936428	C	T	2.06828e-07
	FL	D06	D06_7936456	7936456	G	A	4.22799e-08
	FL	D06	D06_7936525	7936525	A	G	4.3127e-08
	FL	D06	D06_7936702	7936702	G	A	5.48879e-08
	FL	D06	D06_7936720	7936720	A	G	6.24601e-09
	FL	D06	D06_7936778	7936778	A	G	2.73651e-08
	FL	D06	D06_7936998	7936998	G	A	6.04017e-08
	FL	D06	D06_7937342	7937342	T	A	4.93844e-08
	FL	D06	D06_7937414	7937414	A	C	4.65526e-08
	FL	D06	D06_7937612	7937612	G	A	4.7073e-08
	FL	D06	D06_7938032	7938032	C	A	6.6831e-08
	FL	D06	D06_7945116	7945116	G	A	1.49643e-08
	FL	D06	D06_7945220	7945220	T	C	1.79311e-08
	FL	D06	D06_7945350	7945350	A	G	2.6724e-08
	FL	D06	D06_7945392	7945392	G	A	1.91637e-07
	FL	D06	D06_7945523	7945523	T	C	2.12982e-09
	FL	D06	D06_7945589	7945589	A	G	2.26976e-08
	FL	D06	D06_7945594	7945594	C	T	5.70104e-08
	FL	D06	D06_7946147	7946147	G	A	4.2128e-08
	FL	D06	D06_7946211	7946211	A	C	1.77241e-07
	FL	D06	D06_7946219	7946219	C	T	5.40726e-07
	FL	D06	D06_7946325	7946325	C	T	4.4897e-07
	FL	D06	D06_7946347	7946347	G	A	2.70675e-07
	FL	D06	D06_7946443	7946443	T	C	5.41056e-09
	FL	D06	D06_7946464	7946464	C	T	4.90445e-10
	FL	D06	D06_7946496	7946496	T	C	1.85134e-08
	FL	D06	D06_7946543	7946543	G	C	2.08861e-07
	FL	D06	D06_7946729	7946729	C	T	2.37265e-07
	FL	D06	D06_7946834	7946834	C	T	6.2539e-08
	FL	D06	D06_7946938	7946938	A	G	5.4194e-08
	FL	D06	D06_7947408	7947408	A	G	7.49022e-09
	FL	D06	D06_7947628	7947628	T	C	5.05519e-09
	FL	D06	D06_7947633	7947633	T	C	3.01948e-08
	FL	D06	D06_7947763	7947763	G	A	1.79038e-08
	FL	D06	D06_7947872	7947872	A	C	1.4712e-08
	FL	D06	D06_7947957	7947957	A	G	9.06942e-08
	FL	D06	D06_7948219	7948219	G	A	2.88533e-08
	FL	D06	D06_7948342	7948342	T	C	1.67301e-07
	FL	D06	D06_7948485	7948485	T	G	7.33921e-08
	FL	D06	D06_7948497	7948497	T	A	7.64842e-08
	FL	D06	D06_7948587	7948587	C	T	1.1606e-07
	FL	D06	D06_7948807	7948807	T	G	2.66117e-07
	FL	D06	D06_7949386	7949386	G	T	1.74268e-07
	FL	D06	D06_7949607	7949607	T	C	1.53774e-07
	FL	D06	D06_7949707	7949707	C	T	2.94809e-08
	FL	D06	D06_7949722	7949722	T	G	9.27323e-09
	FL	D06	D06_7950155	7950155	A	C	3.74969e-07
	FL	D06	D06_7950169	7950169	T	C	2.62437e-07
	FL	D06	D06_7950460	7950460	T	C	1.45348e-07
	FL	D06	D06_7950512	7950512	T	C	1.90547e-08
	FL	D06	D06_7950746	7950746	A	G	1.26551e-07
	FL	D06	D06_7950863	7950863	C	T	3.5832e-08
	FL	D06	D06_7950926	7950926	A	G	6.89724e-08
	FL	D06	D06_7951070	7951070	C	T	1.00387e-07
	FL	D06	D06_7951313	7951313	A	T	1.84629e-08
	FL	D06	D06_7957032	7957032	T	C	9.4504e-07
	FL	D06	D06_7957060	7957060	T	C	2.52689e-07
	FL	D06	D06_7959653	7959653	A	G	1.22883e-08
	FL	D06	D06_7959722	7959722	A	C	1.70583e-08
	FL	D06	D06_7959747	7959747	A	G	7.49028e-08
	FL	D06	D06_7959807	7959807	T	C	2.58277e-08
	FL	D06	D06_7959974	7959974	G	A	3.30919e-07
	FL	D06	D06_7960795	7960795	A	G	9.59787e-08
	FL	D06	D06_7960841	7960841	C	T	5.14701e-07
	FL	D06	D06_7960894	7960894	A	G	1.58548e-07
	FL	D06	D06_7961150	7961150	A	T	1.05368e-07
	FL	D06	D06_7963354	7963354	G	C	4.5438e-07
	FL	D06	D06_7963477	7963477	C	A	3.74455e-08
	FL	D06	D06_7963578	7963578	A	G	2.23934e-08
	FL	D06	D06_7963791	7963791	C	T	1.64249e-07
	FL	D06	D06_7964743	7964743	A	G	1.58454e-08
	FL	D06	D06_7966623	7966623	C	T	7.474e-08
	FL	D06	D06_7967013	7967013	G	A	4.08817e-07
	FL	D06	D06_7967176	7967176	C	T	8.39111e-08
	FL	D06	D06_7967190	7967190	C	T	6.25209e-08
	FL	D06	D06_7968192	7968192	G	A	5.1393e-08
	FL	D06	D06_7968235	7968235	A	C	3.40403e-08
	FL	D06	D06_7968322	7968322	C	T	1.32493e-07
	FL	D06	D06_7968328	7968328	C	A	1.27901e-07
	FL	D06	D06_7968460	7968460	C	T	1.02142e-07
	FL	D06	D06_7969332	7969332	C	T	4.05032e-07
	FL	D06	D06_7969533	7969533	C	A	1.50987e-07
	FL	D06	D06_7969693	7969693	G	A	4.4598e-07
	FL	D06	D06_7969986	7969986	C	T	7.2507e-08
	FL	D06	D06_7972230	7972230	G	A	1.12081e-07
	FL	D06	D06_7972238	7972238	G	A	1.10386e-07
	FL	D06	D06_7972351	7972351	C	A	4.9563e-08
	FL	D06	D06_7972423	7972423	G	A	5.5235e-07
	FL	D06	D06_7972670	7972670	T	C	1.28237e-07
	FL	D06	D06_7972729	7972729	G	A	9.92065e-08
	FL	D06	D06_7973024	7973024	C	A	1.91941e-07
	FL	D06	D06_7973136	7973136	T	C	5.0681e-09
	FL	D06	D06_7973552	7973552	G	A	1.55608e-07
	FL	D06	D06_7974040	7974040	A	G	1.48585e-08
	FL	D06	D06_7974115	7974115	G	A	7.6911e-08
	FL	D06	D06_7974275	7974275	A	T	2.02943e-08
	FL	D06	D06_7974533	7974533	G	C	1.08196e-07
	FL	D06	D06_7974594	7974594	T	C	3.00535e-08
	FL	D06	D06_7974641	7974641	A	C	1.15963e-07
	FL	D06	D06_7975318	7975318	T	C	9.33006e-08
	FL	D06	D06_7975335	7975335	C	T	1.70764e-07
	FL	D06	D06_7978628	7978628	T	C	2.41275e-07
	FL	D06	D06_7982198	7982198	A	T	8.96464e-08
	FL	D06	D06_7982281	7982281	G	A	1.17091e-07
	FL	D06	D06_7983126	7983126	A	G	1.33416e-07
	FL	D06	D06_7983323	7983323	T	C	1.53911e-08
	FL	D06	D06_7984281	7984281	T	C	3.92241e-07
	FL	D06	D06_7984553	7984553	A	G	1.00992e-07
	FL	D06	D06_7984857	7984857	G	A	1.46856e-07
	FL	D06	D06_7984944	7984944	G	T	2.15068e-07
	FL	D06	D06_7989004	7989004	A	C	4.30349e-08
	FL	D06	D06_7989113	7989113	G	A	1.0541e-07
	FL	D06	D06_7989197	7989197	C	T	7.64177e-08
	FL	D06	D06_7991651	7991651	C	A	8.31421e-08
	FL	D06	D06_7991837	7991837	T	C	1.62769e-07
	FL	D06	D06_7992510	7992510	T	C	1.60522e-08
	FL	D06	D06_7992600	7992600	A	T	2.98976e-08
	FL	D06	D06_7993078	7993078	C	T	1.93836e-08
	FL	D06	D06_7994420	7994420	T	A	1.7981e-07
	FL	D06	D06_7995336	7995336	C	T	6.93444e-07
	FL	D06	D06_7996895	7996895	G	A	2.8695e-07
	FL	D06	D06_7998095	7998095	T	C	3.85953e-08
	FL	D06	D06_7999283	7999283	C	T	1.01411e-07
	FL	D06	D06_7999481	7999481	A	C	3.02673e-08
	FL	D06	D06_7999662	7999662	A	G	1.04804e-08
	FL	D06	D06_8004001	8004001	G	T	5.41508e-08
	FL	D06	D06_8006083	8006083	A	T	4.27653e-07
	FL	D06	D06_8007610	8007610	A	G	1.10887e-07
	FL	D06	D06_8007823	8007823	G	A	5.53335e-07
	FL	D06	D06_8007991	8007991	A	G	9.19707e-07
	FL	D06	D06_8009680	8009680	G	C	5.74663e-07
	FL	D06	D06_8011757	8011757	C	T	2.45472e-08
	FL	D06	D06_8012738	8012738	C	T	1.45317e-07
	FL	D06	D06_8012785	8012785	A	T	5.23385e-08
	FL	D06	D06_8012934	8012934	C	G	3.06677e-08
	FL	D06	D06_8013814	8013814	T	A	7.87371e-08
	FL	D06	D06_8013903	8013903	A	G	2.61176e-07
	FL	D06	D06_8015237	8015237	C	T	4.42082e-07
	FL	D06	D06_8015975	8015975	T	C	8.38271e-07
	FL	D06	D06_8016703	8016703	A	T	9.78764e-09
	FL	D06	D06_8017322	8017322	T	C	6.82103e-08
	FL	D06	D06_8017938	8017938	G	T	2.61817e-07
	FL	D06	D06_8024023	8024023	C	T	9.96559e-08
	FL	D06	D06_8024311	8024311	T	A	3.18239e-08
	FL	D06	D06_8025687	8025687	A	C	2.95598e-08
	FL	D06	D06_8026187	8026187	A	G	7.14494e-08
	FL	D06	D06_8026986	8026986	T	A	8.33958e-08
	FL	D06	D06_8027018	8027018	T	C	3.01853e-08
	FL	D06	D06_8027681	8027681	C	T	9.62725e-09
	FL	D06	D06_8028017	8028017	C	T	5.82126e-07
	FL	D06	D06_8028496	8028496	A	G	8.11038e-08
	FL	D06	D06_8029927	8029927	T	C	1.3123e-07
	FL	D06	D06_8030050	8030050	A	G	3.43059e-08
	FL	D06	D06_8030085	8030085	G	A	3.25992e-07
	FL	D06	D06_8030310	8030310	C	T	3.98057e-07
	FL	D06	D06_8030479	8030479	A	G	4.22041e-08
	FL	D06	D06_8030819	8030819	A	G	4.58043e-08
	FL	D06	D06_8030871	8030871	G	A	1.40526e-07
	FL	D06	D06_8031341	8031341	G	A	4.56224e-07
	FL	D06	D06_8031722	8031722	C	T	1.22237e-07
	FL	D06	D06_8034112	8034112	A	G	5.9601e-07
	FL	D06	D06_8034249	8034249	G	A	1.45701e-07
	FL	D06	D06_8034292	8034292	A	G	9.73298e-08
	FL	D06	D06_8034827	8034827	T	C	1.5547e-07
	FL	D06	D06_8039083	8039083	A	G	3.55128e-07
	FL	D06	D06_8039438	8039438	A	T	1.13595e-07
	FL	D06	D06_8040007	8040007	T	C	3.93142e-09
	FL	D06	D06_8041241	8041241	T	A	5.28398e-07
	FL	D06	D06_8041284	8041284	A	T	8.90712e-08
	FL	D06	D06_8041311	8041311	A	G	2.86183e-07
	FL	D06	D06_8042854	8042854	T	C	5.1463e-10
	FL	D06	D06_8043578	8043578	T	C	1.34513e-07
	FL	D06	D06_8043612	8043612	A	G	4.7841e-08
	FL	D06	D06_8043764	8043764	C	T	7.05224e-08
	FL	D06	D06_8045129	8045129	A	T	1.44024e-07
	FL	D06	D06_8045160	8045160	T	C	4.23205e-07
	FL	D06	D06_8045236	8045236	T	C	1.04258e-07
	FL	D06	D06_8045602	8045602	G	C	3.42639e-08
	FL	D06	D06_8045774	8045774	T	C	1.91306e-07
	FL	D06	D06_8045827	8045827	C	A	8.45109e-08
	FL	D06	D06_8046475	8046475	C	T	2.1875e-07
	FL	D06	D06_8046619	8046619	T	C	4.97241e-08
	FL	D06	D06_8048739	8048739	G	T	7.2215e-08
	FL	D06	D06_8050347	8050347	C	T	6.51495e-08
	FL	D06	D06_8050349	8050349	C	T	6.51495e-08
	FL	D06	D06_8050852	8050852	T	C	3.54713e-08
	FL	D06	D06_8050864	8050864	A	G	1.95486e-08
	FL	D06	D06_8051480	8051480	G	A	1.2049e-07
	FL	D06	D06_8051486	8051486	T	C	3.01792e-08
	FL	D06	D06_8052024	8052024	G	C	6.02405e-08
	FL	D06	D06_8052407	8052407	T	G	3.32212e-08
	FL	D06	D06_8052830	8052830	A	G	8.09229e-09
	FL	D06	D06_8053325	8053325	G	A	2.54198e-07
	FL	D06	D06_8053487	8053487	C	T	3.3724e-08
	FL	D06	D06_8053613	8053613	C	T	5.31129e-08
	FL	D06	D06_8053670	8053670	C	G	2.64556e-07
	FL	D06	D06_8053693	8053693	G	A	1.2046e-07
	FL	D06	D06_8054001	8054001	A	G	1.76103e-08
	FL	D06	D06_8054327	8054327	C	T	1.01497e-07
	FL	D06	D06_8054503	8054503	T	C	3.69819e-08
	FL	D06	D06_8054686	8054686	A	G	5.97291e-08
	FL	D06	D06_8054860	8054860	A	G	2.89554e-08
	FL	D06	D06_8054904	8054904	T	C	3.24813e-08
	FL	D06	D06_8055236	8055236	G	A	5.96927e-07
	FL	D06	D06_8056043	8056043	G	A	4.60791e-08
	FL	D06	D06_8056061	8056061	C	A	4.21658e-08
	FL	D06	D06_8056123	8056123	C	A	1.57299e-07
	FL	D06	D06_8056256	8056256	G	T	7.22099e-08
	FL	D06	D06_8057380	8057380	C	T	3.39e-08
	FL	D06	D06_8057469	8057469	A	G	6.13939e-09
	FL	D06	D06_8057760	8057760	T	G	4.76678e-08
	FL	D06	D06_8057764	8057764	T	A	4.55598e-08
	FL	D06	D06_8058032	8058032	A	G	6.5967e-07
	FL	D06	D06_8058904	8058904	G	T	4.79437e-07
	FL	D06	D06_8058990	8058990	G	A	2.96628e-07
	FL	D06	D06_8059592	8059592	A	G	1.88554e-08
	FL	D06	D06_8059708	8059708	G	A	8.73553e-08
	FL	D06	D06_8062254	8062254	T	G	9.92421e-08
	FL	D06	D06_8062956	8062956	T	C	3.08466e-08
	FL	D06	D06_8063078	8063078	G	A	7.67943e-08
	FL	D06	D06_8063401	8063401	T	C	1.87798e-08
	FL	D06	D06_8063494	8063494	T	G	1.59191e-07
	FL	D06	D06_8064025	8064025	A	C	2.07779e-08
	FL	D06	D06_8064492	8064492	A	C	1.29688e-07
	FL	D06	D06_8064522	8064522	T	C	7.68472e-08
	FL	D06	D06_8064616	8064616	A	C	8.39299e-08
	FL	D06	D06_8064800	8064800	T	C	2.81311e-08
	FL	D06	D06_8065357	8065357	G	C	9.51544e-08
	FL	D06	D06_8065727	8065727	G	C	4.33111e-08
	FL	D06	D06_8066671	8066671	T	C	9.75556e-08
	FL	D06	D06_8070134	8070134	T	A	5.64314e-07
	FL	D06	D06_8071320	8071320	G	A	2.68376e-08
	FL	D06	D06_8071455	8071455	C	A	3.03878e-07
	FL	D06	D06_8071483	8071483	C	T	8.94547e-08
	FL	D06	D06_8072375	8072375	C	T	1.04931e-07
	FL	D06	D06_8072580	8072580	G	A	4.67556e-07
	FL	D06	D06_8073651	8073651	G	A	6.94539e-08
	FL	D06	D06_8074879	8074879	C	T	9.3741e-08
	FL	D06	D06_8075259	8075259	T	G	1.68261e-07
	FL	D06	D06_8075268	8075268	T	A	1.6453e-07
	FL	D06	D06_8076490	8076490	T	A	3.32237e-08
	FL	D06	D06_8076598	8076598	T	G	5.47571e-07
	FL	D06	D06_8076853	8076853	A	T	2.44091e-08
	FL	D06	D06_8077153	8077153	A	G	8.64255e-08
	FL	D06	D06_8077242	8077242	G	C	3.42133e-07
	FL	D06	D06_8080387	8080387	T	C	3.30742e-07
	FL	D06	D06_8080748	8080748	A	G	8.48566e-08
	FL	D06	D06_8080828	8080828	A	G	2.46252e-08
	FL	D06	D06_8080848	8080848	C	T	6.57351e-09
	FL	D06	D06_8080999	8080999	A	G	3.13651e-08
	FL	D06	D06_8081098	8081098	A	G	1.53858e-07
	FL	D06	D06_8081115	8081115	C	T	1.50624e-07
	FL	D06	D06_8081146	8081146	G	A	3.27268e-07
	FL	D06	D06_8082375	8082375	A	G	7.22295e-09
	FL	D06	D06_8083839	8083839	G	A	2.76694e-08
	FL	D06	D06_8083852	8083852	T	C	5.773e-09
	FL	D06	D06_8083967	8083967	C	T	9.57397e-07
	FL	D06	D06_8086419	8086419	C	T	1.55313e-07
	FL	D06	D06_8086666	8086666	G	A	1.55917e-07
	FL	D06	D06_8086731	8086731	A	T	1.05397e-07
	FL	D06	D06_8086909	8086909	A	G	1.94508e-08
	FL	D06	D06_8087151	8087151	G	T	3.90322e-08
	FL	D06	D06_8087869	8087869	T	C	1.37494e-08
	FL	D06	D06_8088874	8088874	A	T	3.33726e-07
	FL	D06	D06_8094017	8094017	T	C	7.7249e-08
	FL	D06	D06_8094592	8094592	A	T	1.4771e-08
	FL	D06	D06_8096573	8096573	G	C	2.19948e-07
	FL	D06	D06_8097020	8097020	C	T	1.10276e-07
	FL	D06	D06_8097076	8097076	G	A	7.67572e-07
	FL	D06	D06_8098344	8098344	G	A	2.59266e-08
	FL	D06	D06_8100552	8100552	G	A	3.54587e-07
	FL	D06	D06_8103550	8103550	G	A	2.61138e-07
	FL	D06	D06_8103661	8103661	C	A	5.44445e-07
	FL	D06	D06_8103828	8103828	T	C	7.76017e-08
	FL	D06	D06_8104185	8104185	T	A	2.42918e-07
	FL	D06	D06_8104400	8104400	C	T	1.55799e-07
	FL	D06	D06_8105235	8105235	G	T	4.87924e-07
	FL	D06	D06_8105628	8105628	T	C	1.88385e-07
	FL	D06	D06_8105740	8105740	C	T	4.65577e-08
	FL	D06	D06_8105748	8105748	A	G	6.59845e-09
	FL	D06	D06_8106350	8106350	T	G	5.50243e-07
	FL	D06	D06_8107351	8107351	A	G	8.36798e-08
	FL	D06	D06_8107656	8107656	T	C	6.49829e-07
	FL	D06	D06_8109254	8109254	C	T	5.40642e-08
	FL	D06	D06_8109546	8109546	T	C	4.40827e-08
	FL	D06	D06_8116006	8116006	T	G	5.01601e-08
	FL	D06	D06_8119962	8119962	C	G	8.16241e-08
	FL	D06	D06_8121575	8121575	G	T	4.03518e-08
	FL	D06	D06_8121682	8121682	G	A	7.31984e-08
	FL	D06	D06_8122706	8122706	C	T	1.40139e-07
	FL	D06	D06_8122743	8122743	G	A	2.63587e-07
	FL	D06	D06_8122905	8122905	C	A	6.35438e-09
	FL	D06	D06_8123300	8123300	G	A	6.42446e-09
	FL	D06	D06_8123396	8123396	T	C	2.62322e-08
	FL	D06	D06_8123682	8123682	T	G	3.24804e-08
	FL	D06	D06_8123871	8123871	T	C	2.1641e-08
	FL	D06	D06_8124029	8124029	C	T	1.62034e-07
	FL	D06	D06_8124478	8124478	T	C	5.66271e-09
	FL	D06	D06_8124597	8124597	T	C	3.28366e-08
	FL	D06	D06_8128299	8128299	T	C	7.49381e-08
	FL	D06	D06_8129115	8129115	C	T	1.67522e-07
	FL	D06	D06_8129167	8129167	T	C	6.04956e-08
	FL	D06	D06_8129197	8129197	C	A	4.19191e-08
	FL	D06	D06_8129329	8129329	T	C	1.2018e-07
	FL	D06	D06_8129666	8129666	G	A	1.14149e-07
	FL	D06	D06_8130132	8130132	T	C	3.04184e-08
	FL	D06	D06_8130277	8130277	C	T	7.71338e-07
	FL	D06	D06_8130563	8130563	C	T	6.41177e-08
	FL	D06	D06_8130628	8130628	C	T	1.36884e-07
	FL	D06	D06_8130857	8130857	T	C	7.45074e-08
	FL	D06	D06_8131793	8131793	T	C	5.52807e-07
	FL	D06	D06_8131849	8131849	T	G	5.59775e-08
	FL	D06	D06_8133521	8133521	G	A	8.87178e-07
	FL	D06	D06_8135983	8135983	A	G	5.27725e-08
	FL	D06	D06_8136515	8136515	C	T	8.75512e-08
	FL	D06	D06_8136541	8136541	A	G	4.16228e-07
	FL	D06	D06_8137266	8137266	C	T	7.29964e-07
	FL	D06	D06_8138566	8138566	T	C	2.14066e-07
	FL	D06	D06_8138857	8138857	G	A	6.7792e-07
	FL	D06	D06_8139061	8139061	C	T	5.35708e-07
	FL	D06	D06_8139469	8139469	T	C	1.24826e-08
	FL	D06	D06_8139568	8139568	T	A	4.0998e-08
	FL	D06	D06_8140012	8140012	C	T	2.35175e-07
	FL	D06	D06_8140198	8140198	C	A	3.52448e-07
	FL	D06	D06_8140242	8140242	C	T	1.93336e-07
	FL	D06	D06_8140319	8140319	G	A	7.31837e-08
	FL	D06	D06_8140332	8140332	A	T	7.29092e-08
	FL	D06	D06_8140425	8140425	T	C	2.16444e-08
	FL	D06	D06_8140729	8140729	T	C	2.71433e-07
	FL	D06	D06_8142894	8142894	G	A	8.95424e-09
	FL	D06	D06_8142926	8142926	C	G	8.59171e-09
	FL	D06	D06_8143104	8143104	G	A	1.26123e-07
	FL	D06	D06_8143761	8143761	C	G	7.85435e-08
	FL	D06	D06_8143881	8143881	C	T	1.2567e-07
	FL	D06	D06_8145174	8145174	C	T	7.85154e-08
	FL	D06	D06_8145262	8145262	G	A	2.3294e-08
	FL	D06	D06_8145447	8145447	A	G	7.52088e-08
	FL	D06	D06_8145916	8145916	T	C	9.0673e-07
	FL	D06	D06_8145928	8145928	G	A	3.24587e-07
	FL	D06	D06_8146226	8146226	T	C	1.53759e-07
	FL	D06	D06_8146269	8146269	T	C	4.14058e-08
	FL	D06	D06_8146389	8146389	T	C	2.02354e-07
	FL	D06	D06_8146728	8146728	C	T	4.70338e-08
	FL	D06	D06_8146883	8146883	T	A	8.13975e-08
	FL	D06	D06_8150195	8150195	C	G	1.81837e-07
	FL	D06	D06_8158858	8158858	G	A	2.91886e-07
	FL	D06	D06_8159073	8159073	G	A	6.85157e-07
	FL	D06	D06_8159313	8159313	T	C	2.55127e-07
	FL	D06	D06_8162436	8162436	C	T	1.09644e-08
	FL	D06	D06_8162662	8162662	T	A	9.61587e-09
	FL	D06	D06_8168004	8168004	G	A	4.97443e-08
	FL	D06	D06_8168044	8168044	A	G	1.65866e-08
	FL	D06	D06_8174385	8174385	A	G	8.36115e-07
	FL	D06	D06_8174641	8174641	T	G	8.05821e-07
	FL	D06	D06_8174881	8174881	C	T	7.84754e-08
	FL	D06	D06_8175918	8175918	A	G	1.21039e-07
	FL	D06	D06_8176816	8176816	C	A	2.0459e-07
	FL	D06	D06_8191667	8191667	T	C	3.53265e-07
	FL	D06	D06_8191675	8191675	A	G	3.53265e-07
	FL	D06	D06_8191753	8191753	A	G	3.95385e-07
	FL	D06	D06_8191869	8191869	C	T	6.64806e-08
	FL	D06	D06_8191901	8191901	G	A	1.47795e-07
	FL	D06	D06_8194733	8194733	C	A	9.52747e-08
	FL	D06	D06_8199062	8199062	A	T	2.60268e-08
	FL	D06	D06_8199887	8199887	G	A	3.42463e-07
	FL	D06	D06_8200057	8200057	A	T	2.03946e-07
	FL	D06	D06_8203466	8203466	T	C	6.64184e-07
	FL	D06	D06_8203592	8203592	T	G	1.32575e-07
	FL	D06	D06_8203740	8203740	G	A	7.15995e-07
	FL	D06	D06_8204246	8204246	A	G	5.63897e-07
	FL	D06	D06_8204300	8204300	G	A	1.59392e-07
	FL	D06	D06_8204430	8204430	A	G	7.81428e-08
	FL	D06	D06_8204524	8204524	T	C	9.81364e-08
	FL	D06	D06_8204552	8204552	G	A	4.51414e-07
	FL	D06	D06_8204644	8204644	G	A	1.08517e-07
	FL	D06	D06_8204925	8204925	C	T	7.97945e-07
	FL	D06	D06_8206449	8206449	A	G	1.56662e-07
	FL	D06	D06_8206509	8206509	C	T	3.75457e-07
	FL	D06	D06_8206593	8206593	G	T	2.74934e-07
	FL	D06	D06_8206611	8206611	T	C	8.85613e-08
	FL	D06	D06_8206808	8206808	G	A	2.1036e-07
	FL	D06	D06_8206911	8206911	A	G	1.06302e-07
	FL	D06	D06_8207059	8207059	G	T	1.05871e-07
	FL	D06	D06_8207148	8207148	C	T	9.47762e-08
	FL	D06	D06_8207350	8207350	C	T	5.67582e-08
	FL	D06	D06_8207777	8207777	T	C	1.3471e-07
	FL	D06	D06_8207817	8207817	T	C	2.94853e-07
	FL	D06	D06_8207926	8207926	G	A	8.18743e-07
	FL	D06	D06_8208489	8208489	A	G	2.7174e-07
	FL	D06	D06_8208827	8208827	C	T	2.50779e-07
	FL	D06	D06_8208884	8208884	T	G	1.93713e-07
	FL	D06	D06_8209205	8209205	T	C	2.90747e-07
	FL	D06	D06_8209369	8209369	A	G	7.24495e-08
	FL	D06	D06_8209566	8209566	G	C	7.96395e-07
	FL	D06	D06_8209626	8209626	T	C	1.06513e-07
	FL	D06	D06_8209698	8209698	T	C	1.16796e-07
	FL	D06	D06_8209750	8209750	G	A	2.31341e-07
	FL	D06	D06_8209759	8209759	G	T	8.04512e-08
	FL	D06	D06_8210140	8210140	G	A	6.25809e-07
	FL	D06	D06_8210172	8210172	C	T	6.86423e-07
	FL	D06	D06_8210222	8210222	G	A	4.89392e-07
	FL	D06	D06_8211393	8211393	G	A	2.51868e-07
	FL	D06	D06_8211641	8211641	G	A	5.48394e-07
	FL	D06	D06_8212302	8212302	C	T	1.21024e-07
	FL	D06	D06_8212449	8212449	C	A	2.64847e-07
	FL	D06	D06_8213221	8213221	T	C	3.46433e-08
	FL	D06	D06_8213671	8213671	A	G	4.68157e-07
	FL	D06	D06_8214053	8214053	C	T	1.08231e-07
	FL	D06	D06_8214166	8214166	G	A	2.00999e-07
	FL	D06	D06_8214556	8214556	G	A	3.42103e-07
	FL	D06	D06_8215116	8215116	T	C	1.18822e-08
	FL	D06	D06_8215214	8215214	T	C	1.83745e-09
	FL	D06	D06_8218278	8218278	G	A	3.63024e-07
	FL	D06	D06_8218288	8218288	G	A	1.82594e-07
	FL	D06	D06_8219532	8219532	A	C	4.43326e-08
	FL	D06	D06_8221944	8221944	A	G	1.34257e-07
	FL	D06	D06_8221992	8221992	A	C	3.60067e-07
	FL	D06	D06_8222718	8222718	C	T	6.66103e-07
	FL	D06	D06_8223593	8223593	T	C	2.35887e-07
	FL	D06	D06_8223641	8223641	A	G	9.42258e-07
	FL	D06	D06_8224478	8224478	A	G	3.49791e-07
	FL	D06	D06_8227751	8227751	T	C	9.40247e-07
	FL	D06	D06_8227819	8227819	G	C	3.67691e-08
	FL	D06	D06_8228065	8228065	A	G	7.36097e-08
	FL	D06	D06_8228247	8228247	A	C	9.97702e-07
	FL	D06	D06_8231088	8231088	A	G	2.60168e-07
	FL	D06	D06_8231160	8231160	G	A	6.36921e-07
	FL	D06	D06_8231246	8231246	C	T	4.80522e-07
	FL	D06	D06_8234615	8234615	T	C	1.53466e-07
	FL	D06	D06_8234617	8234617	G	A	3.13211e-07
	FL	D06	D06_8234715	8234715	T	C	1.17333e-07
	FL	D06	D06_8234748	8234748	G	A	4.32558e-07
	FL	D06	D06_8235122	8235122	C	T	5.4622e-08
	FL	D06	D06_8235146	8235146	C	T	2.21314e-07
	FL	D06	D06_8235235	8235235	G	A	2.47467e-07
	FL	D06	D06_8235259	8235259	A	G	7.93104e-08
	FL	D06	D06_8235270	8235270	A	G	1.46061e-07
	FL	D06	D06_8235428	8235428	G	A	1.47157e-07
	FL	D06	D06_8235640	8235640	A	T	1.50518e-07
	FL	D06	D06_8235687	8235687	A	C	9.57204e-08
	FL	D06	D06_8235776	8235776	G	A	3.77523e-07
	FL	D06	D06_8235784	8235784	T	C	1.79656e-07
	FL	D06	D06_8235802	8235802	A	G	1.79656e-07
	FL	D06	D06_8235858	8235858	A	C	1.25548e-07
	FL	D06	D06_8235868	8235868	T	C	1.25837e-07
	FL	D06	D06_8236583	8236583	A	G	2.13006e-07
	FL	D06	D06_8236758	8236758	A	G	3.53447e-07
	FL	D06	D06_8237014	8237014	C	T	2.65185e-07
	FL	D06	D06_8237024	8237024	G	A	2.14274e-07
	FL	D06	D06_8237172	8237172	G	A	2.64728e-07
	FL	D06	D06_8237444	8237444	T	C	1.89122e-07
	FL	D06	D06_8237474	8237474	A	G	1.37368e-07
	FL	D06	D06_8237494	8237494	G	A	1.3865e-07
	FL	D06	D06_8237504	8237504	T	C	6.36514e-08
	FL	D06	D06_8237589	8237589	T	C	4.09011e-07
	FL	D06	D06_8237718	8237718	G	A	3.41306e-07
	FL	D06	D06_8237775	8237775	G	T	2.31953e-07
	FL	D06	D06_8237781	8237781	T	C	1.22992e-07
	FL	D06	D06_8237812	8237812	C	T	3.07233e-07
	FL	D06	D06_8237817	8237817	T	C	1.9405e-07
	FL	D06	D06_8237985	8237985	G	A	2.75414e-07
	FL	D06	D06_8238032	8238032	A	T	1.90379e-08
	FL	D06	D06_8238126	8238126	A	C	2.25108e-07
	FL	D06	D06_8238194	8238194	C	T	2.02585e-07
	FL	D06	D06_8238235	8238235	A	G	2.78763e-07
	FL	D06	D06_8239363	8239363	T	C	2.96048e-07
	FL	D06	D06_8239379	8239379	A	G	5.10721e-07
	FL	D06	D06_8239580	8239580	G	C	2.06462e-07
	FL	D06	D06_8240235	8240235	T	C	2.21101e-07
	FL	D06	D06_8240275	8240275	C	A	2.16305e-07
	FL	D06	D06_8240335	8240335	T	C	1.94782e-07
	FL	D06	D06_8240457	8240457	G	T	4.20463e-07
	FL	D06	D06_8241007	8241007	G	A	3.62304e-07
	FL	D06	D06_8241166	8241166	A	T	2.03528e-07
	FL	D06	D06_8241360	8241360	C	G	2.63241e-08
	FL	D06	D06_8242055	8242055	C	T	6.22828e-08
	FL	D06	D06_8242105	8242105	T	C	3.3577e-08
	FL	D06	D06_8244859	8244859	A	C	1.90017e-07
	FL	D06	D06_8245021	8245021	T	A	3.0903e-07
	FL	D06	D06_8245208	8245208	T	G	5.04474e-08
	FL	D06	D06_8245315	8245315	T	G	2.50507e-07
	FL	D06	D06_8245338	8245338	C	T	1.75506e-07
	FL	D06	D06_8246170	8246170	G	A	2.98438e-08
	FL	D06	D06_8246213	8246213	T	C	6.58669e-07
	FL	D06	D06_8246214	8246214	G	A	6.58669e-07
	FL	D06	D06_8246265	8246265	G	A	9.53277e-08
	FL	D06	D06_8246623	8246623	C	T	1.49205e-07
	FL	D06	D06_8246648	8246648	C	T	5.03562e-07
	FL	D06	D06_8246866	8246866	C	T	7.08075e-07
	FL	D06	D06_8246933	8246933	T	C	1.727e-07
	FL	D06	D06_8246978	8246978	G	T	8.98665e-07
	FL	D06	D06_8247838	8247838	G	T	2.67527e-07
	FL	D06	D06_8248518	8248518	A	G	5.76334e-08
	FL	D06	D06_8248531	8248531	G	A	1.13499e-07
	FL	D06	D06_8248914	8248914	T	A	1.37755e-07
	FL	D06	D06_8249489	8249489	G	C	3.07096e-07
	FL	D06	D06_8250128	8250128	G	A	9.56394e-08
	FL	D06	D06_8250190	8250190	G	A	3.09166e-08
	FL	D06	D06_8251387	8251387	A	G	6.45207e-08
	FL	D06	D06_8251403	8251403	T	C	4.98623e-08
	FL	D06	D06_8251423	8251423	A	G	3.98135e-08
	FL	D06	D06_8252040	8252040	T	C	4.15288e-07
	FL	D06	D06_8252045	8252045	A	G	2.07255e-07
	FL	D06	D06_8263421	8263421	C	G	1.08566e-07
	FL	D06	D06_8264627	8264627	C	G	2.29055e-10
	FL	D06	D06_8266894	8266894	C	T	8.72691e-07
	FL	D06	D06_8269901	8269901	G	A	4.69988e-07
	FL	D06	D06_8272944	8272944	G	A	3.86278e-07
	FL	D06	D06_8279114	8279114	C	T	5.97408e-08
	FL	D06	D06_8279118	8279118	A	G	1.42541e-07
	FL	D06	D06_8280369	8280369	A	G	9.31092e-07
	FL	D06	D06_8280402	8280402	T	A	1.79921e-07
	FL	D06	D06_8280662	8280662	G	T	1.3082e-07
	FL	D06	D06_8282802	8282802	G	A	2.14256e-07
	FL	D06	D06_8283302	8283302	G	A	1.05714e-07
	FL	D06	D06_8284504	8284504	A	G	4.96757e-08
	FL	D06	D06_8284541	8284541	T	C	2.68069e-08
	FL	D06	D06_8286047	8286047	T	C	1.30715e-07
	FL	D06	D06_8286882	8286882	T	C	1.35544e-07
	FL	D06	D06_8286943	8286943	T	C	9.99779e-08
	FL	D06	D06_8287340	8287340	T	G	1.41178e-07
	FL	D06	D06_8287858	8287858	A	C	4.68109e-08
	FL	D06	D06_8293781	8293781	C	T	2.67038e-07
	FL	D06	D06_8293788	8293788	G	A	2.61067e-07
	FL	D06	D06_8293865	8293865	A	T	1.04625e-07
	FL	D06	D06_8294227	8294227	T	G	1.18377e-07
	FL	D06	D06_8294641	8294641	A	T	7.8858e-08
	FL	D06	D06_8296869	8296869	G	A	4.38652e-07
	FL	D06	D06_8299328	8299328	T	A	5.06924e-08
	FL	D06	D06_8301157	8301157	A	T	1.26326e-07
	FL	D06	D06_8301286	8301286	G	A	7.74235e-07
	FL	D06	D06_8301515	8301515	G	A	7.75517e-07
	FL	D06	D06_8302275	8302275	A	G	5.32777e-08
	FL	D06	D06_8302547	8302547	A	C	2.1242e-07
	FL	D06	D06_8302997	8302997	A	G	9.52033e-08
	FL	D06	D06_8303037	8303037	C	T	8.00908e-07
	FL	D06	D06_8317012	8317012	G	A	2.12597e-07
	FL	D06	D06_8322582	8322582	G	T	3.09737e-08
	FL	D06	D06_8322701	8322701	C	A	3.49947e-07
	FL	D06	D06_8323256	8323256	C	T	1.55375e-07
	FL	D06	D06_8323609	8323609	G	A	1.78809e-07
	FL	D06	D06_8323633	8323633	C	T	5.3234e-08
	FL	D06	D06_8326025	8326025	C	G	4.01579e-08
	FL	D06	D06_8326467	8326467	T	C	7.92506e-09
	FL	D06	D06_8326670	8326670	C	G	4.24461e-08
	FL	D06	D06_8326756	8326756	C	G	3.32525e-07
	FL	D06	D06_8327736	8327736	T	G	1.71139e-08
	FL	D06	D06_8327915	8327915	T	A	7.24211e-08
	FL	D06	D06_8328335	8328335	T	G	4.7014e-08
	FL	D06	D06_8332561	8332561	G	A	1.27009e-08
	FL	D06	D06_8332637	8332637	G	A	6.91787e-09
	FL	D06	D06_8332685	8332685	C	T	1.50886e-09
	FL	D06	D06_8335446	8335446	C	G	2.58777e-08
	FL	D06	D06_8336077	8336077	C	A	8.63767e-08
	FL	D06	D06_8336233	8336233	A	C	2.47455e-08
	FL	D06	D06_8336300	8336300	T	C	1.22279e-07
	FL	D06	D06_8342525	8342525	T	C	6.00823e-07
	FL	D06	D06_8344246	8344246	G	T	8.62874e-07
	FL	D06	D06_8354932	8354932	A	T	6.0269e-07
	FL	D06	D06_8355046	8355046	A	T	1.62184e-07
	FL	D06	D06_8355098	8355098	A	G	3.36855e-07
	FL	D06	D06_8355158	8355158	C	A	4.62048e-07
	FL	D06	D06_8355307	8355307	T	A	4.83145e-07
	FL	D06	D06_8355447	8355447	C	T	1.92801e-07
	FL	D06	D06_8355559	8355559	A	T	7.5337e-07
	FL	D06	D06_8355797	8355797	A	T	9.54231e-07
	FL	D06	D06_8356265	8356265	C	A	5.17556e-07
	FL	D06	D06_8363103	8363103	C	T	2.04726e-07
	FL	D06	D06_8364324	8364324	A	G	5.01029e-08
	FL	D06	D06_8365513	8365513	G	A	4.67467e-07
	FL	D06	D06_8368351	8368351	C	T	5.87961e-08
	FL	D06	D06_8369029	8369029	G	A	7.35246e-08
	FL	D06	D06_8371774	8371774	T	C	3.10436e-07
	FL	D06	D06_8371806	8371806	C	T	1.32705e-07
	FL	D06	D06_8374136	8374136	T	C	9.35869e-07
	FL	D06	D06_8374336	8374336	A	G	1.07359e-07
	FL	D06	D06_8376714	8376714	T	G	7.60423e-07
	FL	D06	D06_8376924	8376924	T	G	2.25438e-07
	FL	D06	D06_8377006	8377006	T	C	1.63318e-07
	FL	D06	D06_8377012	8377012	A	G	1.59639e-07
	FL	D06	D06_8377153	8377153	A	G	9.20249e-09
	FL	D06	D06_8377205	8377205	T	C	2.22512e-07
	FL	D06	D06_8377495	8377495	A	G	2.94045e-08
	FL	D06	D06_8377649	8377649	A	G	1.85399e-09
	FL	D06	D06_8377892	8377892	G	T	1.55302e-07
	FL	D06	D06_8378730	8378730	T	C	5.97071e-07
	FL	D06	D06_8380623	8380623	A	C	3.9845e-09
	FL	D06	D06_8380638	8380638	A	C	3.28514e-09
	FL	D06	D06_8381090	8381090	T	C	1.03316e-07
	FL	D06	D06_8381327	8381327	G	A	4.49352e-07
	FL	D06	D06_8381546	8381546	G	T	5.68854e-07
	FL	D06	D06_8381581	8381581	G	T	9.35877e-07
	FL	D06	D06_8382764	8382764	G	A	9.53764e-08
	FL	D06	D06_8383886	8383886	A	G	6.22725e-07
	FL	D06	D06_8384743	8384743	G	A	4.06971e-07
	FL	D06	D06_8385760	8385760	G	A	9.29439e-07
	FL	D06	D06_8386028	8386028	T	G	1.05878e-07
	FL	D06	D06_8386176	8386176	T	C	4.65708e-07
	FL	D06	D06_8386304	8386304	T	A	1.37314e-07
	FL	D06	D06_8386312	8386312	C	T	1.25494e-07
	FL	D06	D06_8386368	8386368	T	C	1.97447e-07
	FL	D06	D06_8386641	8386641	C	T	8.34846e-07
	FL	D06	D06_8386717	8386717	A	G	8.39379e-08
	FL	D06	D06_8386863	8386863	A	G	8.81149e-07
	FL	D06	D06_8387467	8387467	G	A	4.21121e-07
	FL	D06	D06_8388478	8388478	G	A	5.02673e-07
	FL	D06	D06_8392856	8392856	A	G	7.99745e-07
	FL	D06	D06_8397625	8397625	T	A	2.39689e-07
	FL	D06	D06_8401591	8401591	G	C	1.5879e-07
	FL	D06	D06_8401667	8401667	T	C	3.8112e-08
	FL	D06	D06_8401946	8401946	A	G	1.51548e-07
	FL	D06	D06_8403344	8403344	T	C	3.19224e-07
	FL	D06	D06_8403461	8403461	A	G	1.29352e-07
	FL	D06	D06_8403830	8403830	G	A	4.53712e-08
	FL	D06	D06_8404086	8404086	A	G	2.25378e-08
	FL	D06	D06_8404299	8404299	G	A	7.75268e-08
	FL	D06	D06_8404383	8404383	G	A	5.93768e-08
	FL	D06	D06_8404924	8404924	C	T	3.59876e-07
	FL	D06	D06_8404955	8404955	G	A	3.86881e-07
	FL	D06	D06_8405261	8405261	A	G	1.28823e-07
	FL	D06	D06_8405374	8405374	C	T	9.10169e-07
	FL	D06	D06_8405484	8405484	C	T	1.59582e-07
	FL	D06	D06_8406138	8406138	A	G	3.23633e-07
	FL	D06	D06_8407614	8407614	T	C	2.16434e-07
	FL	D06	D06_8407788	8407788	C	T	2.44726e-07
	FL	D06	D06_8409272	8409272	G	A	1.76218e-07
	FL	D06	D06_8409439	8409439	C	T	1.86753e-07
	FL	D06	D06_8409541	8409541	C	T	1.57226e-07
	FL	D06	D06_8409774	8409774	G	A	6.82057e-07
	FL	D06	D06_8409932	8409932	G	C	2.47889e-07
	FL	D06	D06_8411160	8411160	A	G	2.03465e-07
	FL	D06	D06_8411207	8411207	T	G	1.47545e-07
	FL	D06	D06_8411802	8411802	T	G	6.25749e-08
	FL	D06	D06_8412052	8412052	A	G	2.22635e-07
	FL	D06	D06_8412821	8412821	G	T	2.46534e-07
	FL	D06	D06_8413583	8413583	A	G	6.06371e-07
	FL	D06	D06_8415584	8415584	C	T	2.55185e-07
	FL	D06	D06_8415712	8415712	T	C	4.39437e-07
	FL	D06	D06_8415779	8415779	C	T	2.65781e-07
	FL	D06	D06_8419146	8419146	G	A	1.28886e-07
	FL	D06	D06_8419606	8419606	T	C	2.69937e-08
	FL	D06	D06_8419687	8419687	G	A	4.88235e-08
	FL	D06	D06_8419871	8419871	C	T	9.28114e-08
	FL	D06	D06_8420146	8420146	G	T	7.69388e-07
	FL	D06	D06_8424813	8424813	G	A	7.53439e-08
	FL	D06	D06_8424964	8424964	C	A	1.4779e-07
	FL	D06	D06_8425310	8425310	A	C	1.27996e-08
	FL	D06	D06_8425476	8425476	A	G	4.46299e-08
	FL	D06	D06_8427464	8427464	A	G	4.59534e-07
	FL	D06	D06_8428737	8428737	A	G	5.86342e-07
	FL	D06	D06_8429273	8429273	A	C	2.96889e-07
	FL	D06	D06_8429317	8429317	G	C	5.2952e-08
	FL	D06	D06_8430281	8430281	G	A	2.55894e-07
	FL	D06	D06_8432748	8432748	C	G	4.13248e-07
	FL	D06	D06_8432965	8432965	G	A	3.66313e-08
	FL	D06	D06_8434573	8434573	C	T	3.8893e-07
	FL	D06	D06_8438098	8438098	A	G	2.90915e-07
	FL	D06	D06_8439242	8439242	A	C	2.03892e-07
	FL	D06	D06_8439505	8439505	T	G	1.15372e-07
	FL	D06	D06_8439768	8439768	T	C	1.75877e-07
	FL	D06	D06_8441202	8441202	G	A	8.76367e-07
	FL	D06	D06_8450016	8450016	T	C	4.41908e-07
	FL	D06	D06_8451857	8451857	A	G	1.04535e-08
	FL	D06	D06_8451929	8451929	A	G	2.59779e-07
	FL	D06	D06_8452076	8452076	G	A	1.72756e-07
	FL	D06	D06_8452204	8452204	A	G	2.78465e-08
	FL	D06	D06_8452265	8452265	A	G	1.14797e-07
	FL	D06	D06_8452487	8452487	C	T	7.02668e-07
	FL	D06	D06_8452727	8452727	A	G	2.81094e-08
	FL	D06	D06_8452750	8452750	G	A	2.64383e-07
	FL	D06	D06_8453099	8453099	T	G	2.18508e-07
	FL	D06	D06_8453308	8453308	G	A	2.70712e-07
	FL	D06	D06_8453345	8453345	A	G	3.43097e-07
	FL	D06	D06_8453545	8453545	T	C	4.94197e-07
	FL	D06	D06_8454043	8454043	A	T	3.5013e-07
	FL	D06	D06_8454067	8454067	A	G	2.76568e-07
	FL	D06	D06_8454549	8454549	G	A	8.23483e-07
	FL	D06	D06_8454564	8454564	C	G	6.92487e-07
	FL	D06	D06_8454667	8454667	C	T	7.20733e-07
	FL	D06	D06_8454677	8454677	G	A	7.5744e-07
	FL	D06	D06_8455277	8455277	G	A	4.4312e-07
	FL	D06	D06_8457986	8457986	A	T	4.93914e-07
	FL	D06	D06_8458019	8458019	G	C	5.74864e-07
	FL	D06	D06_8458140	8458140	G	C	1.41296e-07
	FL	D06	D06_8458287	8458287	G	A	6.67579e-09
	FL	D06	D06_8458607	8458607	G	A	2.6557e-07
	FL	D06	D06_8458909	8458909	G	C	6.12691e-07
	FL	D06	D06_8472844	8472844	T	A	1.78291e-07
	FL	D06	D06_8477237	8477237	T	C	4.04259e-08
	FL	D06	D06_8477640	8477640	A	G	1.2647e-07
	FL	D06	D06_8478275	8478275	A	G	5.1989e-08
	FL	D06	D06_8478327	8478327	T	C	1.47052e-07
	FL	D06	D06_8478425	8478425	A	G	1.1276e-07
	FL	D06	D06_8478905	8478905	T	G	3.02708e-07
	FL	D06	D06_8484980	8484980	G	A	2.19399e-08
	FL	D06	D06_8484985	8484985	G	A	2.44122e-08
	FL	D06	D06_8516577	8516577	A	C	2.4252e-07
	FL	D06	D06_8520205	8520205	A	G	2.29924e-07
	FL	D07	D07_11593260	11593260	T	C	1.25871e-07
	FL	D08	D08_5101407	5101407	G	A	1.30696e-07
	FL	D09	D09_48401474	48401474	A	G	4.27736e-08
	FL	D10	D10_48991660	48991660	G	A	1.28116e-07
	FL	D10	D10_54495911	54495911	A	G	7.56734e-07
	FL	D10	D10_54496423	54496423	A	G	6.8868e-07
	FL	D10	D10_54500907	54500907	C	T	9.51656e-07
	FL	D10	D10_54500926	54500926	C	A	6.35855e-07
	FL	D10	D10_54500965	54500965	T	C	9.32669e-07
	FL	D10	D10_54500971	54500971	C	T	9.32669e-07
	FL	D10	D10_54511457	54511457	C	T	6.97879e-07
	FL	D10	D10_55241689	55241689	T	C	6.07202e-10
	FL	D10	D10_55258796	55258796	C	T	2.03486e-10
	FL	D10	D10_55264850	55264850	A	G	2.16757e-08
	FL	D10	D10_55267846	55267846	C	T	4.83131e-08
	FL	D10	D10_55267929	55267929	A	G	6.99747e-12
	FL	D10	D10_55274538	55274538	A	T	2.23774e-09
	FL	D10	D10_55275745	55275745	C	A	6.3566e-08
	FL	D10	D10_55290386	55290386	T	C	2.60657e-07
	FL	D10	D10_55754237	55754237	G	A	1.19986e-07
	FL	D10	D10_59331426	59331426	A	G	6.14261e-07
	FL	D11	D11_66165056	66165056	G	A	6.79255e-07
	FL	D11	D11_66242544	66242544	A	G	8.88922e-08
	FL	D11	D11_66580247	66580247	T	C	5.61461e-09
	FL	D13	D13_1977816	1977816	A	G	5.97927e-07
	FS	A01	A01_104763589	104763589	G	A	7.96375e-07
	FS	A01	A01_104944998	104944998	G	A	4.62832e-07
	FS	A01	A01_105313332	105313332	G	A	6.51489e-07
	FS	A01	A01_105348694	105348694	G	A	3.12587e-07
	FS	A02	A02_67264288	67264288	A	G	1.02704e-08
	FS	A03	A03_28835792	28835792	A	G	9.04664e-07
	FS	A05	A05_16371363	16371363	A	C	1.06499e-07
	FS	A05	A05_30226680	30226680	T	C	3.78784e-08
	FS	A05	A05_30227637	30227637	A	C	1.76221e-08
	FS	A06	A06_87576929	87576929	G	A	6.02482e-08
	FS	A06	A06_87576930	87576930	G	A	6.47496e-08
	FS	A06	A06_100642034	100642034	C	T	2.263e-07
	FS	A06	A06_103129685	103129685	A	G	4.39977e-08
	FS	A06	A06_103630142	103630142	A	T	8.37397e-07
	FS	A06	A06_103900623	103900623	A	G	7.13839e-07
	FS	A06	A06_103900632	103900632	G	A	7.13839e-07
	FS	A07	A07_1872426	1872426	C	G	4.24797e-09
	FS	A07	A07_84943970	84943970	A	G	1.76131e-08
	FS	A07	A07_86292741	86292741	T	G	9.08722e-09
	FS	A07	A07_86425142	86425142	T	C	9.78695e-07
	FS	A07	A07_86446589	86446589	T	C	2.68742e-07
	FS	A07	A07_86542954	86542954	A	G	6.54944e-10
	FS	A07	A07_86648598	86648598	T	C	3.36338e-07
	FS	A07	A07_86817023	86817023	A	T	1.95058e-07
	FS	A07	A07_86831190	86831190	T	C	1.54479e-07
	FS	A07	A07_86932250	86932250	A	G	4.29116e-07
	FS	A07	A07_86982031	86982031	T	C	8.06486e-07
	FS	A07	A07_87062652	87062652	T	G	1.30842e-07
	FS	A07	A07_87104471	87104471	T	C	3.20412e-07
	FS	A07	A07_87255923	87255923	A	G	4.59421e-07
	FS	A07	A07_87430887	87430887	T	C	8.49796e-09
	FS	A07	A07_87615447	87615447	A	G	5.76895e-08
	FS	A07	A07_87715302	87715302	A	G	1.78942e-07
	FS	A07	A07_88631295	88631295	A	G	6.32995e-09
	FS	A07	A07_88820452	88820452	A	G	7.23722e-08
	FS	A07	A07_89954160	89954160	T	C	2.19977e-08
	FS	A07	A07_90052312	90052312	T	C	5.39117e-08
	FS	A07	A07_90053856	90053856	G	T	4.43082e-07
	FS	A07	A07_90313691	90313691	G	A	1.87066e-08
	FS	A07	A07_90314441	90314441	C	T	8.68882e-09
	FS	A07	A07_90314568	90314568	G	T	8.20676e-09
	FS	A07	A07_90314629	90314629	C	T	1.69637e-08
	FS	A07	A07_90317487	90317487	G	A	5.43366e-08
	FS	A07	A07_90317672	90317672	T	C	1.19291e-08
	FS	A07	A07_90318495	90318495	T	G	4.7801e-08
	FS	A07	A07_90329740	90329740	A	G	8.03045e-07
	FS	A07	A07_90340304	90340304	C	T	6.76406e-08
	FS	A07	A07_90340762	90340762	G	A	3.19507e-07
	FS	A07	A07_90341233	90341233	G	A	2.42059e-07
	FS	A07	A07_90341809	90341809	C	T	3.593e-07
	FS	A07	A07_90342451	90342451	C	T	3.71968e-08
	FS	A07	A07_90344789	90344789	C	T	1.11622e-07
	FS	A07	A07_90451846	90451846	G	A	3.91284e-07
	FS	A07	A07_90452813	90452813	C	T	3.97135e-08
	FS	A07	A07_90452815	90452815	A	G	7.12604e-08
	FS	A07	A07_90453468	90453468	C	T	8.24452e-08
	FS	A07	A07_90453724	90453724	G	C	1.54147e-07
	FS	A07	A07_90457271	90457271	G	A	3.51144e-07
	FS	A07	A07_90457399	90457399	T	C	1.44234e-07
	FS	A07	A07_90457424	90457424	G	T	1.27602e-07
	FS	A07	A07_90458187	90458187	G	A	3.96741e-07
	FS	A07	A07_90461600	90461600	C	G	3.69282e-07
	FS	A07	A07_90462536	90462536	G	A	5.3576e-07
	FS	A07	A07_90462554	90462554	G	T	5.02171e-07
	FS	A07	A07_90462911	90462911	C	T	1.46072e-07
	FS	A07	A07_90463814	90463814	G	A	7.26145e-08
	FS	A07	A07_90464126	90464126	A	G	1.30492e-07
	FS	A07	A07_90464282	90464282	G	A	5.30765e-08
	FS	A07	A07_90464328	90464328	C	T	2.55557e-08
	FS	A07	A07_90464425	90464425	T	A	1.59308e-07
	FS	A07	A07_90464715	90464715	G	A	2.67771e-07
	FS	A07	A07_90464737	90464737	T	C	2.26579e-07
	FS	A07	A07_90469293	90469293	G	C	9.91294e-08
	FS	A07	A07_90469426	90469426	T	C	2.84667e-07
	FS	A07	A07_90469750	90469750	T	G	2.6253e-07
	FS	A07	A07_90469765	90469765	C	T	5.46886e-07
	FS	A07	A07_90473030	90473030	C	T	1.18703e-07
	FS	A07	A07_90473813	90473813	T	C	8.87728e-08
	FS	A07	A07_90477309	90477309	A	G	1.64047e-07
	FS	A07	A07_90479322	90479322	G	C	2.38129e-07
	FS	A07	A07_90482182	90482182	A	T	5.84589e-07
	FS	A07	A07_90486457	90486457	G	A	5.90354e-07
	FS	A07	A07_90486458	90486458	G	A	5.90354e-07
	FS	A07	A07_90486744	90486744	C	T	3.63321e-07
	FS	A07	A07_90486830	90486830	G	A	2.60681e-07
	FS	A07	A07_90488853	90488853	G	A	3.05748e-08
	FS	A07	A07_90488931	90488931	G	A	7.3197e-08
	FS	A07	A07_90490944	90490944	A	G	4.504e-08
	FS	A07	A07_90493276	90493276	C	T	4.3168e-07
	FS	A07	A07_90494011	90494011	G	T	7.6701e-08
	FS	A07	A07_90494090	90494090	G	A	7.39773e-08
	FS	A07	A07_90497084	90497084	C	T	3.09474e-07
	FS	A07	A07_90497258	90497258	C	T	1.42324e-07
	FS	A07	A07_90497455	90497455	G	A	1.37695e-07
	FS	A07	A07_90498520	90498520	C	T	2.37658e-07
	FS	A07	A07_90499483	90499483	C	T	5.64869e-07
	FS	A07	A07_90501424	90501424	C	A	1.07913e-07
	FS	A07	A07_90504528	90504528	A	G	2.6105e-07
	FS	A07	A07_90515271	90515271	A	T	8.52342e-08
	FS	A07	A07_90541009	90541009	G	A	2.58322e-07
	FS	A07	A07_90541010	90541010	C	A	2.58322e-07
	FS	A07	A07_90543613	90543613	G	T	4.02212e-08
	FS	A07	A07_90561116	90561116	G	A	2.14471e-07
	FS	A07	A07_90561712	90561712	C	T	9.51937e-07
	FS	A07	A07_90562450	90562450	G	A	3.35546e-07
	FS	A07	A07_90562550	90562550	G	A	1.54902e-07
	FS	A07	A07_90564984	90564984	G	A	1.16051e-07
	FS	A07	A07_90570113	90570113	C	A	5.71156e-08
	FS	A07	A07_90580340	90580340	G	A	8.42119e-08
	FS	A07	A07_90580680	90580680	T	C	7.70497e-07
	FS	A07	A07_90580797	90580797	C	T	3.14579e-07
	FS	A07	A07_90583584	90583584	G	A	8.19378e-08
	FS	A07	A07_90583793	90583793	G	A	1.71946e-07
	FS	A07	A07_90587207	90587207	T	C	5.75589e-08
	FS	A07	A07_90587578	90587578	A	G	8.4999e-07
	FS	A07	A07_90588343	90588343	C	T	2.53032e-07
	FS	A07	A07_90589212	90589212	C	A	5.63006e-08
	FS	A08	A08_2468705	2468705	A	G	9.10042e-07
	FS	A08	A08_2477487	2477487	A	G	3.56679e-07
	FS	A08	A08_2477495	2477495	G	A	3.35218e-07
	FS	A08	A08_2501449	2501449	T	C	1.40422e-07
	FS	A08	A08_29294334	29294334	A	G	4.29935e-07
	FS	A08	A08_29324330	29324330	A	T	3.10156e-07
	FS	A08	A08_29325965	29325965	A	G	5.19795e-08
	FS	A08	A08_30034743	30034743	G	C	2.66972e-07
	FS	A08	A08_30075579	30075579	A	G	3.9903e-09
	FS	A08	A08_30775171	30775171	T	G	2.18072e-07
	FS	A08	A08_31560351	31560351	T	C	2.51539e-10
	FS	A08	A08_31560397	31560397	C	T	1.58939e-10
	FS	A08	A08_32559172	32559172	A	G	1.62729e-07
	FS	A08	A08_34186114	34186114	A	G	3.84945e-10
	FS	A08	A08_34264344	34264344	G	C	4.45437e-10
	FS	A08	A08_35432565	35432565	C	T	3.44584e-07
	FS	A08	A08_40754456	40754456	A	T	4.37578e-07
	FS	A08	A08_41281838	41281838	G	A	8.78554e-07
	FS	A08	A08_41971122	41971122	A	G	4.38131e-08
	FS	A08	A08_42505393	42505393	G	A	5.48021e-07
	FS	A08	A08_44150472	44150472	C	A	1.12932e-09
	FS	A08	A08_44150504	44150504	C	T	3.63172e-10
	FS	A08	A08_47610763	47610763	G	A	2.10371e-09
	FS	A08	A08_48700969	48700969	G	T	3.64005e-07
	FS	A08	A08_51191135	51191135	T	C	2.95415e-07
	FS	A08	A08_51471903	51471903	C	T	1.79578e-09
	FS	A08	A08_53666688	53666688	A	C	1.91569e-07
	FS	A08	A08_54906654	54906654	G	A	6.97407e-07
	FS	A08	A08_55172590	55172590	A	G	9.47309e-07
	FS	A08	A08_57409018	57409018	G	A	9.22249e-10
	FS	A08	A08_60019778	60019778	C	T	1.41647e-09
	FS	A08	A08_60092241	60092241	A	C	6.57766e-07
	FS	A08	A08_62296179	62296179	G	A	1.07831e-08
	FS	A08	A08_63463343	63463343	A	G	5.81498e-10
	FS	A08	A08_63526697	63526697	C	T	2.27536e-07
	FS	A08	A08_63779986	63779986	G	A	1.60957e-11
	FS	A08	A08_63964474	63964474	A	G	3.52048e-09
	FS	A08	A08_65670345	65670345	T	C	2.42783e-07
	FS	A08	A08_66856506	66856506	A	G	6.83531e-09
	FS	A08	A08_67565956	67565956	T	C	8.15515e-07
	FS	A08	A08_69494553	69494553	G	C	1.81667e-08
	FS	A08	A08_71955354	71955354	C	T	3.01784e-10
	FS	A08	A08_72490892	72490892	G	A	1.3245e-11
	FS	A08	A08_72898350	72898350	A	G	1.61813e-08
	FS	A08	A08_73270978	73270978	T	G	3.0191e-07
	FS	A08	A08_74378914	74378914	A	G	1.87451e-07
	FS	A08	A08_74378928	74378928	A	G	5.99866e-09
	FS	A09	A09_61594696	61594696	G	A	8.02027e-07
	FS	A09	A09_61596836	61596836	A	T	4.87396e-07
	FS	A09	A09_61670378	61670378	C	T	3.23408e-07
	FS	A09	A09_61672346	61672346	T	G	2.06935e-07
	FS	A09	A09_61672740	61672740	T	A	1.64288e-07
	FS	A09	A09_61700895	61700895	A	G	4.72187e-07
	FS	A09	A09_63927350	63927350	C	T	7.81191e-08
	FS	A09	A09_67687397	67687397	A	G	7.53594e-07
	FS	A10	A10_109011401	109011401	T	C	6.43142e-07
	FS	A10	A10_109013058	109013058	A	T	1.38594e-07
	FS	A10	A10_109013187	109013187	T	C	4.55733e-07
	FS	A10	A10_109013402	109013402	C	A	7.03428e-07
	FS	A10	A10_109052941	109052941	A	T	8.81321e-07
	FS	A10	A10_109053652	109053652	C	T	1.07546e-07
	FS	A10	A10_109055338	109055338	G	T	4.89488e-07
	FS	A10	A10_109057664	109057664	T	C	2.22554e-07
	FS	A10	A10_109058649	109058649	C	G	5.45205e-07
	FS	A10	A10_114291796	114291796	C	T	7.35566e-07
	FS	A10	A10_114448373	114448373	T	C	1.29565e-07
	FS	A10	A10_114458050	114458050	A	C	7.06524e-07
	FS	A10	A10_114658377	114658377	T	C	6.84094e-07
	FS	A11	A11_1621668	1621668	T	G	5.67974e-08
	FS	A11	A11_1637402	1637402	A	G	4.70268e-08
	FS	A11	A11_1638297	1638297	C	T	3.40589e-07
	FS	A11	A11_1639628	1639628	A	T	5.27363e-07
	FS	A11	A11_1646428	1646428	C	T	3.92016e-07
	FS	A11	A11_1666091	1666091	A	T	8.57555e-07
	FS	A11	A11_1674860	1674860	A	G	4.75509e-07
	FS	A11	A11_1685671	1685671	A	G	1.06881e-07
	FS	A11	A11_1685798	1685798	A	T	1.16974e-07
	FS	A11	A11_1686656	1686656	C	T	1.93128e-07
	FS	A11	A11_1686695	1686695	C	T	6.29126e-08
	FS	A11	A11_1690986	1690986	C	A	7.25757e-08
	FS	A11	A11_1694404	1694404	G	A	6.56906e-08
	FS	A11	A11_1721710	1721710	A	T	5.52579e-07
	FS	A11	A11_1736331	1736331	C	T	5.71966e-07
	FS	A11	A11_1736538	1736538	T	A	4.78772e-07
	FS	A11	A11_1742567	1742567	T	C	2.51348e-07
	FS	A11	A11_1747273	1747273	G	A	7.08848e-07
	FS	A11	A11_1751709	1751709	G	T	4.53085e-07
	FS	A11	A11_1752889	1752889	G	A	4.53633e-07
	FS	A11	A11_1753631	1753631	G	A	3.3808e-07
	FS	A11	A11_1758047	1758047	G	C	4.05902e-07
	FS	A11	A11_1758048	1758048	C	T	4.05902e-07
	FS	A11	A11_1768730	1768730	G	A	3.22892e-08
	FS	A11	A11_1773275	1773275	A	G	4.12302e-07
	FS	A11	A11_1774115	1774115	C	A	3.71892e-07
	FS	A11	A11_16918749	16918749	T	G	3.76668e-11
	FS	A11	A11_16923524	16923524	T	A	1.83193e-10
	FS	A11	A11_16924129	16924129	T	A	2.6835e-10
	FS	A11	A11_16924146	16924146	G	A	2.57743e-10
	FS	A11	A11_16926707	16926707	T	G	4.56241e-10
	FS	A11	A11_16964684	16964684	A	G	4.51112e-07
	FS	A11	A11_16997802	16997802	T	G	4.19976e-07
	FS	A11	A11_16998276	16998276	C	T	5.84181e-07
	FS	A11	A11_16998318	16998318	A	G	8.82508e-07
	FS	A11	A11_16998746	16998746	A	T	3.19491e-07
	FS	A11	A11_17003290	17003290	C	T	6.21263e-07
	FS	A11	A11_17007720	17007720	C	T	3.56198e-07
	FS	A11	A11_17007994	17007994	T	A	3.75825e-07
	FS	A11	A11_17009800	17009800	C	T	3.01064e-07
	FS	A11	A11_17010114	17010114	T	C	5.49642e-07
	FS	A11	A11_17010429	17010429	G	T	9.678e-07
	FS	A11	A11_17010572	17010572	A	C	2.60333e-07
	FS	A11	A11_17017060	17017060	T	C	7.18006e-07
	FS	A11	A11_17017083	17017083	A	G	8.15561e-07
	FS	A11	A11_17017156	17017156	C	T	5.35768e-07
	FS	A11	A11_17017905	17017905	G	A	6.29764e-07
	FS	A11	A11_17018601	17018601	G	T	9.21979e-07
	FS	A11	A11_17018713	17018713	C	A	3.23815e-07
	FS	A11	A11_17019848	17019848	C	T	8.31767e-07
	FS	A11	A11_17019964	17019964	T	C	3.08613e-07
	FS	A11	A11_17019975	17019975	A	G	3.43313e-07
	FS	A11	A11_17020537	17020537	T	C	7.47824e-07
	FS	A11	A11_17020743	17020743	C	T	1.6784e-07
	FS	A11	A11_17021567	17021567	G	A	5.83285e-07
	FS	A11	A11_17021614	17021614	T	C	8.73334e-07
	FS	A11	A11_17021634	17021634	G	A	8.58561e-07
	FS	A11	A11_17021641	17021641	A	G	8.58561e-07
	FS	A11	A11_17024434	17024434	C	T	6.88109e-07
	FS	A11	A11_17025751	17025751	G	A	6.9116e-07
	FS	A11	A11_17026117	17026117	T	G	9.1395e-07
	FS	A11	A11_17026221	17026221	G	A	4.88473e-07
	FS	A11	A11_17026413	17026413	A	G	7.44445e-07
	FS	A11	A11_17026609	17026609	C	T	1.70985e-07
	FS	A11	A11_17026773	17026773	T	C	6.17389e-07
	FS	A11	A11_17027218	17027218	C	T	7.89012e-07
	FS	A11	A11_17027876	17027876	T	C	8.72053e-07
	FS	A11	A11_17027879	17027879	A	C	8.72053e-07
	FS	A11	A11_17029249	17029249	C	T	8.43938e-07
	FS	A11	A11_17029449	17029449	T	C	8.77199e-07
	FS	A11	A11_17029463	17029463	A	G	8.2208e-07
	FS	A11	A11_17031135	17031135	C	T	2.60748e-07
	FS	A11	A11_17031143	17031143	A	C	1.58622e-07
	FS	A11	A11_17031153	17031153	G	A	1.35437e-07
	FS	A11	A11_17033224	17033224	G	C	3.56228e-07
	FS	A11	A11_17033295	17033295	G	A	8.34471e-07
	FS	A11	A11_17033394	17033394	G	C	9.26052e-07
	FS	A11	A11_17033411	17033411	T	C	5.32873e-07
	FS	A11	A11_17033494	17033494	T	C	1.98849e-07
	FS	A11	A11_17033683	17033683	C	T	2.76659e-07
	FS	A11	A11_17033707	17033707	T	C	1.23772e-07
	FS	A11	A11_17034064	17034064	G	A	5.24464e-07
	FS	A11	A11_17034074	17034074	T	G	5.0442e-07
	FS	A11	A11_17034076	17034076	T	C	5.57595e-07
	FS	A11	A11_17034910	17034910	A	T	6.13603e-07
	FS	A11	A11_17035704	17035704	A	G	3.0242e-07
	FS	A11	A11_17035735	17035735	T	C	3.3248e-07
	FS	A11	A11_17036506	17036506	G	A	2.3764e-07
	FS	A11	A11_17036892	17036892	C	T	8.10005e-07
	FS	A11	A11_17038365	17038365	G	A	4.14071e-07
	FS	A11	A11_17038581	17038581	C	T	2.13671e-07
	FS	A11	A11_17039072	17039072	G	T	1.6243e-07
	FS	A11	A11_17041070	17041070	T	A	6.23292e-07
	FS	A11	A11_17158165	17158165	C	G	4.48144e-09
	FS	A11	A11_17179223	17179223	A	G	1.58901e-10
	FS	A11	A11_17179297	17179297	A	G	1.58726e-11
	FS	A11	A11_17179586	17179586	G	C	4.31699e-09
	FS	A11	A11_17180072	17180072	A	C	7.55676e-10
	FS	A11	A11_17182428	17182428	C	T	7.67169e-09
	FS	A11	A11_17183084	17183084	C	A	2.26088e-08
	FS	A11	A11_17184387	17184387	G	A	1.8772e-10
	FS	A11	A11_17184655	17184655	A	G	1.41897e-08
	FS	A11	A11_17184683	17184683	A	T	1.31216e-08
	FS	A11	A11_17186681	17186681	G	A	1.34622e-08
	FS	A11	A11_17186750	17186750	A	G	1.34097e-09
	FS	A11	A11_17186808	17186808	A	G	4.79682e-10
	FS	A11	A11_17186875	17186875	G	A	1.85124e-10
	FS	A11	A11_17186898	17186898	C	T	1.94768e-10
	FS	A11	A11_17187124	17187124	A	G	2.26992e-10
	FS	A11	A11_17187735	17187735	G	A	4.70407e-08
	FS	A11	A11_17187908	17187908	C	T	1.57719e-07
	FS	A11	A11_17188044	17188044	C	T	3.39492e-09
	FS	A11	A11_17188149	17188149	C	T	8.46123e-10
	FS	A11	A11_17188177	17188177	T	C	6.11485e-10
	FS	A11	A11_17188984	17188984	C	T	2.07103e-07
	FS	A11	A11_17189034	17189034	C	T	2.97192e-08
	FS	A11	A11_17197862	17197862	G	T	4.40602e-08
	FS	A11	A11_17197955	17197955	C	A	1.99284e-08
	FS	A11	A11_17198021	17198021	A	G	4.29544e-08
	FS	A11	A11_17199800	17199800	C	T	1.6113e-10
	FS	A11	A11_17203444	17203444	A	C	8.17819e-09
	FS	A11	A11_17209159	17209159	T	G	2.63075e-11
	FS	A11	A11_17213225	17213225	T	C	4.24112e-09
	FS	A11	A11_17213362	17213362	C	T	4.11185e-13
	FS	A11	A11_17213369	17213369	G	A	3.45134e-13
	FS	A11	A11_17213509	17213509	G	A	3.43706e-10
	FS	A11	A11_17214114	17214114	T	C	2.86782e-10
	FS	A11	A11_17214124	17214124	A	G	2.45336e-10
	FS	A11	A11_17214257	17214257	C	T	1.05565e-08
	FS	A11	A11_17219752	17219752	A	T	3.30368e-07
	FS	A11	A11_17221364	17221364	C	G	3.68074e-09
	FS	A11	A11_17229930	17229930	G	T	1.55832e-10
	FS	A11	A11_17232836	17232836	G	A	3.70599e-07
	FS	A11	A11_17393462	17393462	T	C	8.23286e-07
	FS	A11	A11_17396269	17396269	T	G	9.64294e-07
	FS	A11	A11_17409910	17409910	G	T	5.97735e-07
	FS	A11	A11_17683794	17683794	G	A	1.16507e-07
	FS	A11	A11_22192977	22192977	C	T	3.48867e-07
	FS	A11	A11_22206883	22206883	A	C	5.51293e-08
	FS	A11	A11_22213385	22213385	C	T	4.81209e-07
	FS	A11	A11_22213588	22213588	C	G	3.21188e-07
	FS	A11	A11_22213781	22213781	G	A	3.39232e-07
	FS	A11	A11_22219309	22219309	A	T	2.37914e-07
	FS	A11	A11_22219422	22219422	A	C	3.37614e-07
	FS	A11	A11_22219516	22219516	T	G	1.0074e-07
	FS	A11	A11_28922403	28922403	A	G	9.83307e-09
	FS	A11	A11_54969810	54969810	A	G	5.3035e-07
	FS	A11	A11_55084769	55084769	A	G	8.3795e-08
	FS	A11	A11_58679743	58679743	A	G	3.15003e-07
	FS	A11	A11_118415316	118415316	T	A	5.99856e-07
	FS	A11	A11_118431057	118431057	G	A	1.33781e-07
	FS	D01	D01_995723	995723	G	A	2.5963e-07
	FS	D01	D01_996146	996146	G	A	3.23685e-07
	FS	D01	D01_996750	996750	G	T	1.75489e-07
	FS	D01	D01_997604	997604	G	A	1.3769e-08
	FS	D01	D01_998449	998449	C	T	2.21757e-07
	FS	D01	D01_1605556	1605556	A	T	3.68246e-07
	FS	D01	D01_31320663	31320663	A	G	5.72666e-07
	FS	D01	D01_40119870	40119870	G	A	6.65717e-07
	FS	D01	D01_54106630	54106630	T	C	4.60017e-07
	FS	D02	D02_11758321	11758321	G	C	7.28157e-07
	FS	D02	D02_11758463	11758463	T	C	3.13343e-07
	FS	D02	D02_11760203	11760203	G	C	1.32877e-07
	FS	D02	D02_11779657	11779657	A	G	2.96366e-07
	FS	D02	D02_11780425	11780425	C	A	9.16128e-08
	FS	D02	D02_11780901	11780901	T	C	6.23005e-07
	FS	D02	D02_11782641	11782641	T	A	7.62867e-07
	FS	D02	D02_11783822	11783822	C	T	1.09925e-07
	FS	D02	D02_11783995	11783995	T	C	3.78207e-08
	FS	D02	D02_11784062	11784062	T	A	1.58636e-07
	FS	D02	D02_11784472	11784472	T	C	5.33987e-07
	FS	D02	D02_11789214	11789214	G	A	6.36562e-07
	FS	D02	D02_11789286	11789286	T	C	1.89867e-07
	FS	D02	D02_11790673	11790673	A	G	6.05281e-08
	FS	D02	D02_11790778	11790778	A	T	2.01464e-07
	FS	D02	D02_11791262	11791262	T	G	2.36123e-07
	FS	D02	D02_11792283	11792283	A	G	5.18622e-07
	FS	D02	D02_11794981	11794981	C	T	1.02052e-07
	FS	D02	D02_11795037	11795037	C	T	6.27974e-07
	FS	D02	D02_11795192	11795192	C	T	3.70782e-07
	FS	D02	D02_11795201	11795201	C	A	3.77507e-07
	FS	D02	D02_11797367	11797367	T	C	2.16736e-08
	FS	D02	D02_11797374	11797374	T	C	2.18308e-08
	FS	D02	D02_11797469	11797469	T	C	4.77851e-09
	FS	D02	D02_11798219	11798219	C	A	4.40096e-07
	FS	D02	D02_11798287	11798287	G	A	4.44935e-07
	FS	D02	D02_11798470	11798470	G	A	3.63423e-07
	FS	D02	D02_11798572	11798572	A	G	2.07444e-08
	FS	D02	D02_11798620	11798620	A	T	5.73213e-08
	FS	D02	D02_11800355	11800355	A	G	7.38858e-08
	FS	D02	D02_11800361	11800361	T	C	1.59422e-07
	FS	D02	D02_11800381	11800381	T	G	3.9959e-08
	FS	D02	D02_11800651	11800651	C	T	1.11594e-07
	FS	D02	D02_11800897	11800897	A	G	1.32039e-07
	FS	D02	D02_11800905	11800905	C	T	1.33603e-07
	FS	D02	D02_11801027	11801027	T	C	1.2715e-07
	FS	D02	D02_11801342	11801342	G	A	9.54501e-07
	FS	D02	D02_11801478	11801478	T	C	6.24278e-07
	FS	D02	D02_11801981	11801981	T	C	2.20533e-07
	FS	D02	D02_11802000	11802000	G	A	2.63688e-07
	FS	D02	D02_11802081	11802081	T	A	7.9284e-07
	FS	D02	D02_11802105	11802105	G	T	7.18707e-07
	FS	D02	D02_11802390	11802390	C	T	1.29718e-07
	FS	D02	D02_11803069	11803069	T	C	9.93039e-08
	FS	D02	D02_11803353	11803353	T	C	1.52364e-07
	FS	D02	D02_11803930	11803930	C	T	7.69718e-08
	FS	D02	D02_11804736	11804736	T	C	5.685e-07
	FS	D02	D02_11804742	11804742	T	C	2.64557e-07
	FS	D02	D02_11804761	11804761	A	G	2.25532e-07
	FS	D02	D02_11805435	11805435	A	C	6.37072e-08
	FS	D02	D02_11805476	11805476	T	A	5.36227e-07
	FS	D02	D02_11805501	11805501	C	T	9.68935e-07
	FS	D02	D02_11805556	11805556	T	C	4.83891e-07
	FS	D02	D02_11805660	11805660	C	T	4.26252e-07
	FS	D02	D02_11807913	11807913	A	G	1.07429e-07
	FS	D02	D02_11809279	11809279	G	A	9.55638e-08
	FS	D02	D02_11809637	11809637	A	G	8.40919e-08
	FS	D02	D02_11810876	11810876	A	G	7.73779e-07
	FS	D02	D02_11812688	11812688	A	G	1.36931e-07
	FS	D02	D02_11812905	11812905	G	A	1.2656e-07
	FS	D02	D02_11812927	11812927	A	C	1.29746e-07
	FS	D02	D02_11812928	11812928	A	T	1.29746e-07
	FS	D02	D02_11813730	11813730	C	T	1.94102e-07
	FS	D02	D02_11813891	11813891	T	C	3.84808e-07
	FS	D02	D02_11814492	11814492	G	T	2.8737e-08
	FS	D02	D02_11814533	11814533	C	G	1.07372e-07
	FS	D02	D02_11814709	11814709	C	T	3.9937e-08
	FS	D02	D02_11815796	11815796	A	G	4.99132e-07
	FS	D02	D02_11816033	11816033	G	A	3.33487e-07
	FS	D02	D02_11816153	11816153	A	C	3.8596e-08
	FS	D02	D02_11818038	11818038	C	T	3.33246e-07
	FS	D02	D02_11818223	11818223	A	G	1.40333e-07
	FS	D02	D02_11818336	11818336	G	A	1.34455e-08
	FS	D02	D02_11818381	11818381	C	T	3.37408e-07
	FS	D02	D02_11824592	11824592	T	C	4.71346e-07
	FS	D02	D02_11824617	11824617	T	C	1.95478e-07
	FS	D02	D02_11824679	11824679	G	A	1.95346e-08
	FS	D02	D02_11824732	11824732	C	T	2.84839e-07
	FS	D02	D02_11824779	11824779	T	C	6.01049e-07
	FS	D02	D02_11824988	11824988	A	G	4.6219e-08
	FS	D02	D02_11825093	11825093	A	G	1.09158e-07
	FS	D02	D02_11825149	11825149	T	G	5.07684e-07
	FS	D02	D02_11825299	11825299	C	T	6.89099e-07
	FS	D02	D02_11825603	11825603	T	C	4.39763e-07
	FS	D02	D02_11825639	11825639	T	C	5.62735e-07
	FS	D02	D02_11825841	11825841	A	C	6.71567e-07
	FS	D02	D02_11826222	11826222	G	A	2.83171e-07
	FS	D02	D02_11826512	11826512	T	C	2.20968e-08
	FS	D02	D02_11827003	11827003	C	T	1.87686e-08
	FS	D02	D02_11828952	11828952	G	T	3.33419e-08
	FS	D02	D02_11829029	11829029	A	G	1.62761e-07
	FS	D02	D02_11831878	11831878	T	C	4.68069e-08
	FS	D02	D02_11834717	11834717	T	C	2.83625e-07
	FS	D02	D02_11835185	11835185	A	G	6.16163e-07
	FS	D02	D02_11835211	11835211	C	T	6.59195e-07
	FS	D02	D02_11835272	11835272	C	T	3.02471e-07
	FS	D02	D02_11835278	11835278	A	G	3.57105e-07
	FS	D02	D02_11835470	11835470	T	A	1.08973e-07
	FS	D02	D02_11836301	11836301	G	A	9.98008e-07
	FS	D02	D02_11836410	11836410	T	C	9.48668e-08
	FS	D02	D02_11836478	11836478	T	C	4.70608e-08
	FS	D02	D02_11837131	11837131	A	T	4.41847e-07
	FS	D02	D02_11837193	11837193	T	C	8.94241e-07
	FS	D02	D02_11837678	11837678	A	G	7.63745e-08
	FS	D02	D02_11841051	11841051	G	A	4.56395e-07
	FS	D02	D02_11841458	11841458	T	C	2.44094e-07
	FS	D02	D02_11841581	11841581	A	G	2.84774e-07
	FS	D02	D02_11841610	11841610	C	G	7.04194e-07
	FS	D02	D02_11841759	11841759	A	G	5.65632e-07
	FS	D02	D02_11841948	11841948	C	T	1.50214e-07
	FS	D02	D02_11841965	11841965	T	C	3.31854e-07
	FS	D02	D02_11842013	11842013	C	T	1.24799e-07
	FS	D02	D02_11842374	11842374	A	G	4.67202e-07
	FS	D02	D02_11842764	11842764	G	A	2.96851e-07
	FS	D02	D02_11842899	11842899	A	G	6.2639e-07
	FS	D02	D02_11842978	11842978	C	T	1.12213e-07
	FS	D02	D02_11843038	11843038	G	T	1.80913e-07
	FS	D02	D02_11843137	11843137	C	T	1.29512e-07
	FS	D02	D02_11843241	11843241	T	C	2.2752e-07
	FS	D02	D02_11843290	11843290	C	T	1.53474e-07
	FS	D02	D02_11985033	11985033	A	G	3.55289e-07
	FS	D02	D02_12238057	12238057	A	G	3.10019e-08
	FS	D02	D02_12425700	12425700	A	C	9.72068e-07
	FS	D02	D02_12476502	12476502	G	A	5.03306e-07
	FS	D02	D02_12504251	12504251	G	A	6.7985e-07
	FS	D02	D02_12640575	12640575	T	C	1.88706e-07
	FS	D02	D02_22839717	22839717	A	G	2.0968e-07
	FS	D02	D02_60827642	60827642	C	T	2.72339e-08
	FS	D02	D02_61492921	61492921	G	A	1.10075e-08
	FS	D02	D02_61493272	61493272	G	A	3.01699e-08
	FS	D02	D02_61493968	61493968	G	A	1.75264e-08
	FS	D02	D02_61494196	61494196	G	T	3.64004e-08
	FS	D02	D02_61495534	61495534	T	C	7.10005e-09
	FS	D02	D02_61532745	61532745	C	T	3.21079e-09
	FS	D02	D02_61539963	61539963	G	A	7.31713e-08
	FS	D02	D02_61541109	61541109	G	A	2.694e-07
	FS	D02	D02_61541230	61541230	G	A	9.36624e-08
	FS	D02	D02_61714541	61714541	G	C	1.53711e-07
	FS	D02	D02_61715408	61715408	T	C	9.21204e-08
	FS	D02	D02_61715484	61715484	T	A	3.96649e-07
	FS	D02	D02_61716873	61716873	G	C	2.72234e-07
	FS	D02	D02_61719291	61719291	T	C	3.07003e-07
	FS	D02	D02_61719481	61719481	A	G	3.54899e-07
	FS	D02	D02_61740512	61740512	T	G	2.14565e-08
	FS	D02	D02_61746020	61746020	G	A	6.78482e-09
	FS	D02	D02_61752769	61752769	A	G	4.16442e-09
	FS	D02	D02_61754089	61754089	C	T	1.96566e-09
	FS	D02	D02_61758859	61758859	T	G	9.36734e-09
	FS	D02	D02_61759008	61759008	C	T	3.35974e-09
	FS	D02	D02_61760091	61760091	C	T	7.47328e-09
	FS	D02	D02_61785765	61785765	T	C	1.63591e-09
	FS	D02	D02_61796090	61796090	C	T	7.50306e-09
	FS	D02	D02_61796855	61796855	T	C	7.0849e-09
	FS	D02	D02_61815558	61815558	G	C	7.97225e-09
	FS	D02	D02_61974587	61974587	C	T	1.65413e-08
	FS	D02	D02_62004668	62004668	T	C	8.73528e-09
	FS	D02	D02_62373206	62373206	T	C	3.84578e-07
	FS	D02	D02_62400898	62400898	A	G	3.9964e-08
	FS	D02	D02_62579790	62579790	T	C	3.32244e-08
	FS	D02	D02_62639848	62639848	T	C	8.07411e-09
	FS	D02	D02_63083614	63083614	A	G	3.38613e-07
	FS	D02	D02_63102839	63102839	C	T	1.55161e-07
	FS	D02	D02_63103562	63103562	A	G	5.7393e-07
	FS	D02	D02_63109556	63109556	A	C	1.62387e-08
	FS	D02	D02_63255773	63255773	A	G	1.88086e-08
	FS	D02	D02_65037201	65037201	A	C	6.98201e-09
	FS	D02	D02_65082049	65082049	C	T	1.09679e-08
	FS	D02	D02_65099458	65099458	T	C	6.79913e-09
	FS	D02	D02_65102184	65102184	G	A	7.74342e-07
	FS	D02	D02_65105231	65105231	G	A	2.76855e-09
	FS	D02	D02_65115158	65115158	C	T	9.02274e-08
	FS	D03	D03_26041262	26041262	T	C	1.02747e-07
	FS	D03	D03_26053527	26053527	A	C	4.17914e-07
	FS	D03	D03_29927639	29927639	A	G	4.45002e-07
	FS	D03	D03_30777588	30777588	A	G	8.00715e-07
	FS	D03	D03_30996756	30996756	A	G	5.7245e-07
	FS	D03	D03_31594659	31594659	G	T	8.30594e-08
	FS	D03	D03_31600576	31600576	A	G	4.59327e-07
	FS	D03	D03_31600594	31600594	T	C	5.58223e-07
	FS	D03	D03_31601461	31601461	T	C	4.61751e-07
	FS	D03	D03_31601517	31601517	T	C	5.94092e-08
	FS	D03	D03_31601532	31601532	C	T	1.22108e-07
	FS	D03	D03_31601793	31601793	A	G	9.66073e-08
	FS	D03	D03_31607503	31607503	C	T	5.17475e-07
	FS	D03	D03_31607518	31607518	G	T	5.88819e-07
	FS	D03	D03_31610797	31610797	A	G	6.52664e-07
	FS	D03	D03_31610864	31610864	A	G	2.07028e-07
	FS	D03	D03_31615121	31615121	C	T	9.80521e-07
	FS	D03	D03_31615142	31615142	T	C	3.98671e-07
	FS	D03	D03_31615901	31615901	C	A	3.45687e-07
	FS	D03	D03_31615916	31615916	A	C	4.73123e-07
	FS	D03	D03_31616018	31616018	C	T	7.29928e-07
	FS	D03	D03_31616397	31616397	A	C	6.87456e-07
	FS	D03	D03_31616644	31616644	C	T	3.16618e-07
	FS	D03	D03_31616905	31616905	T	C	4.22321e-07
	FS	D03	D03_31622500	31622500	T	C	8.05228e-07
	FS	D03	D03_31623319	31623319	A	G	4.02492e-08
	FS	D03	D03_31623647	31623647	C	G	8.55964e-07
	FS	D03	D03_31626600	31626600	A	G	8.9584e-08
	FS	D03	D03_31626628	31626628	G	A	1.05708e-07
	FS	D03	D03_31627528	31627528	G	A	2.35468e-08
	FS	D03	D03_31627532	31627532	G	A	2.35468e-08
	FS	D03	D03_31627547	31627547	A	G	5.85696e-08
	FS	D03	D03_31628107	31628107	C	T	7.13383e-07
	FS	D03	D03_31628318	31628318	C	T	7.37688e-07
	FS	D03	D03_31629858	31629858	T	C	5.4952e-07
	FS	D03	D03_31631087	31631087	G	A	2.94254e-07
	FS	D03	D03_31631132	31631132	T	C	3.07711e-07
	FS	D03	D03_31641692	31641692	T	G	2.27337e-07
	FS	D03	D03_31649491	31649491	C	T	4.05357e-07
	FS	D03	D03_31656120	31656120	G	A	1.8202e-07
	FS	D03	D03_31659006	31659006	A	C	4.31956e-07
	FS	D03	D03_31659127	31659127	C	T	2.57731e-07
	FS	D03	D03_31660523	31660523	C	T	2.54471e-07
	FS	D03	D03_31661036	31661036	T	A	7.82433e-07
	FS	D03	D03_31662116	31662116	A	G	4.72706e-07
	FS	D03	D03_31666056	31666056	C	T	2.0318e-07
	FS	D03	D03_31666363	31666363	T	A	8.13516e-07
	FS	D03	D03_31666824	31666824	A	G	8.05411e-07
	FS	D03	D03_31677379	31677379	A	G	9.0114e-07
	FS	D03	D03_31682528	31682528	G	A	2.61643e-07
	FS	D03	D03_31682626	31682626	T	C	1.66383e-07
	FS	D03	D03_31683229	31683229	T	C	2.93162e-07
	FS	D03	D03_31693109	31693109	G	A	8.35154e-07
	FS	D03	D03_31693363	31693363	C	T	5.31444e-07
	FS	D03	D03_31693370	31693370	A	G	7.12432e-07
	FS	D03	D03_31693379	31693379	T	G	7.12432e-07
	FS	D03	D03_31693515	31693515	C	T	2.12367e-07
	FS	D03	D03_31693861	31693861	G	A	6.72371e-07
	FS	D03	D03_31694785	31694785	G	A	2.03293e-07
	FS	D03	D03_31695598	31695598	G	T	5.98211e-07
	FS	D03	D03_31699519	31699519	G	A	6.13114e-07
	FS	D03	D03_31699547	31699547	T	G	7.5353e-07
	FS	D03	D03_31700071	31700071	A	G	3.75548e-08
	FS	D03	D03_31700079	31700079	T	C	3.95247e-08
	FS	D03	D03_31701295	31701295	A	C	4.33583e-07
	FS	D03	D03_31701618	31701618	A	C	4.77238e-07
	FS	D03	D03_31702230	31702230	C	T	8.62947e-07
	FS	D03	D03_31702863	31702863	C	T	9.66576e-07
	FS	D03	D03_31703663	31703663	C	T	4.21068e-07
	FS	D03	D03_31703795	31703795	C	T	2.64978e-07
	FS	D03	D03_31703886	31703886	G	A	5.64369e-07
	FS	D03	D03_31705832	31705832	T	A	4.3851e-07
	FS	D03	D03_31706022	31706022	A	G	1.77314e-07
	FS	D03	D03_31706029	31706029	G	A	1.85408e-07
	FS	D03	D03_31710862	31710862	A	G	8.45717e-07
	FS	D03	D03_31715417	31715417	G	A	7.66541e-07
	FS	D03	D03_31717928	31717928	T	G	6.61533e-07
	FS	D03	D03_31718799	31718799	T	A	3.13134e-07
	FS	D03	D03_31718805	31718805	G	A	3.13134e-07
	FS	D03	D03_31718832	31718832	C	T	3.46267e-07
	FS	D03	D03_31719036	31719036	G	A	7.94622e-07
	FS	D03	D03_31719390	31719390	G	T	8.76216e-07
	FS	D03	D03_31722162	31722162	G	C	1.47099e-07
	FS	D03	D03_31722525	31722525	G	A	2.9392e-07
	FS	D03	D03_31738391	31738391	C	T	9.30766e-07
	FS	D03	D03_31740060	31740060	A	G	5.3083e-07
	FS	D03	D03_31740108	31740108	G	C	5.15386e-08
	FS	D03	D03_31748227	31748227	A	G	5.62458e-07
	FS	D03	D03_31748237	31748237	G	A	5.62458e-07
	FS	D03	D03_31749717	31749717	A	G	2.05231e-07
	FS	D03	D03_31749988	31749988	G	A	3.87841e-07
	FS	D03	D03_31750143	31750143	C	T	7.00839e-07
	FS	D03	D03_31750144	31750144	G	A	7.00839e-07
	FS	D03	D03_31750553	31750553	T	C	8.81929e-07
	FS	D03	D03_31751649	31751649	G	A	1.43554e-07
	FS	D03	D03_31751678	31751678	C	T	1.63659e-07
	FS	D03	D03_31751694	31751694	C	T	5.06939e-07
	FS	D03	D03_31751707	31751707	C	T	3.74318e-07
	FS	D03	D03_31751726	31751726	G	A	2.12432e-07
	FS	D03	D03_31752311	31752311	C	A	9.75148e-07
	FS	D03	D03_31752343	31752343	T	C	5.39265e-07
	FS	D03	D03_31753326	31753326	C	T	3.11098e-07
	FS	D03	D03_31753630	31753630	C	A	4.1439e-07
	FS	D03	D03_31754199	31754199	A	G	6.592e-07
	FS	D03	D03_31754967	31754967	T	C	2.49517e-07
	FS	D03	D03_31755302	31755302	G	A	6.68429e-07
	FS	D03	D03_31755804	31755804	A	G	4.03495e-07
	FS	D03	D03_31776120	31776120	C	T	1.90241e-07
	FS	D03	D03_31777331	31777331	T	C	5.65185e-07
	FS	D03	D03_31777413	31777413	T	C	7.87009e-08
	FS	D03	D03_31777648	31777648	A	T	4.39751e-07
	FS	D03	D03_31777649	31777649	G	A	4.39751e-07
	FS	D03	D03_31777956	31777956	G	T	2.4707e-07
	FS	D03	D03_31778002	31778002	C	T	4.84353e-07
	FS	D03	D03_31782267	31782267	C	T	3.96662e-07
	FS	D03	D03_31788506	31788506	C	T	3.72529e-07
	FS	D03	D03_31788620	31788620	A	G	7.53343e-07
	FS	D03	D03_31788706	31788706	G	A	7.38749e-07
	FS	D03	D03_31789510	31789510	G	A	1.45221e-07
	FS	D03	D03_31789617	31789617	C	A	6.47785e-07
	FS	D03	D03_31789710	31789710	T	A	3.29328e-07
	FS	D03	D03_31789876	31789876	A	G	5.02748e-07
	FS	D03	D03_31789891	31789891	G	A	7.4567e-07
	FS	D03	D03_31790322	31790322	C	T	3.45117e-07
	FS	D03	D03_31790581	31790581	T	G	7.5455e-07
	FS	D03	D03_31791249	31791249	A	G	7.35248e-07
	FS	D03	D03_31795342	31795342	C	T	2.53141e-07
	FS	D03	D03_31795364	31795364	C	A	2.44484e-07
	FS	D03	D03_31795506	31795506	A	G	2.45556e-07
	FS	D03	D03_31795904	31795904	C	T	2.13229e-07
	FS	D03	D03_31796092	31796092	G	A	5.09498e-07
	FS	D03	D03_31796093	31796093	A	G	5.09498e-07
	FS	D03	D03_31796111	31796111	A	T	3.02875e-07
	FS	D03	D03_31796364	31796364	G	T	5.40851e-07
	FS	D03	D03_31796422	31796422	C	G	1.32562e-07
	FS	D03	D03_31796497	31796497	T	C	5.12686e-07
	FS	D03	D03_31796547	31796547	C	T	5.68069e-07
	FS	D03	D03_31796572	31796572	C	T	7.07039e-07
	FS	D03	D03_31796673	31796673	G	A	8.23152e-07
	FS	D03	D03_31796757	31796757	T	C	2.88332e-07
	FS	D03	D03_31796823	31796823	T	C	6.75277e-07
	FS	D03	D03_31797366	31797366	A	G	9.12186e-07
	FS	D03	D03_31797784	31797784	A	G	4.89932e-07
	FS	D03	D03_31797800	31797800	A	G	2.50349e-07
	FS	D03	D03_31797979	31797979	T	G	4.36925e-07
	FS	D03	D03_31798017	31798017	C	A	6.84256e-07
	FS	D03	D03_31798140	31798140	C	T	4.08307e-07
	FS	D03	D03_31798294	31798294	C	T	2.90909e-07
	FS	D03	D03_31798402	31798402	A	G	4.23639e-07
	FS	D03	D03_31799359	31799359	T	C	3.77442e-08
	FS	D03	D03_31799413	31799413	A	G	6.87299e-08
	FS	D03	D03_31799466	31799466	G	A	1.69746e-07
	FS	D03	D03_31799489	31799489	T	A	1.53839e-07
	FS	D03	D03_31799503	31799503	T	G	1.57271e-07
	FS	D03	D03_31808178	31808178	A	T	5.95376e-08
	FS	D03	D03_31815672	31815672	T	C	6.6018e-07
	FS	D03	D03_31815702	31815702	C	T	2.04072e-08
	FS	D03	D03_31815738	31815738	A	G	1.19419e-09
	FS	D03	D03_31819974	31819974	T	A	2.21498e-07
	FS	D03	D03_31820217	31820217	T	C	1.71424e-07
	FS	D03	D03_31820381	31820381	C	T	9.39898e-07
	FS	D03	D03_31820648	31820648	T	C	1.11313e-07
	FS	D03	D03_31829643	31829643	G	A	1.99834e-07
	FS	D03	D03_31830666	31830666	G	A	5.10195e-07
	FS	D03	D03_31835369	31835369	T	C	9.42092e-07
	FS	D03	D03_31841579	31841579	C	T	3.62357e-07
	FS	D03	D03_31844352	31844352	A	G	2.27115e-07
	FS	D03	D03_31844401	31844401	G	A	4.05441e-07
	FS	D03	D03_31846480	31846480	T	C	3.68738e-07
	FS	D03	D03_31847600	31847600	G	A	6.45586e-07
	FS	D03	D03_31848294	31848294	C	G	1.71394e-07
	FS	D03	D03_31848572	31848572	G	T	7.3481e-07
[truncated: 5,497 more rows]
