# Supplementary material for: Deep learning-based phenotype prediction analysis of genotype-environment interactions and mining of environmentally stable germplasm and elite loci in cotton
Source: Research Square preprint supplement (doi:10.21203/rs.3.rs-7483914/v1), 2025-09-11
Supplement: Supplementary file 4 [file 7d94db08450cd88975f5a8f4.xlsx]

## Sheet: Sheet2
Supplementary Table 6. Analysis of variance and heritability for 13 traits of 419 upland cotton.
Traits	Variance Component	Estimate	Standard Error	Heritability
FL	Genotype	2.3045	0.16	0.942118
	Environment	0.929	0.4
	G×E&Residuals	0.77	0.02
FS	Genotype	1.057	0.09	0.748451
	Environment	1.003	0.43
	G×E&Residuals	3.26	0.07
M	Genotype	0.1511	0.01103	0.853954
	Environment	0.214	0.09135
	G×E&Residuals	0.0961	0.002202
LU	Genotype	0.775	0.06	0.846147
	Environment	0.592	0.254
	G×E&Residuals	1.099	0.023
SBno	Genotype	0.051	0.014	0.0851419
	Environment	5.107	2.409
	G×E&Residuals	1.469	0.034
SBnode	Genotype	0.1891	0.0182	0.319138
	Environment	4.1912	2.0964
	G×E&Residuals	0.65	0.0159
FD	Genotype	3.787	0.312	0.324075
	Environment	86.152	36.744
	G×E&Residuals	8.631	0.18
GP	Genotype	7.55	0.68	0.285588
	Environment	199.58	85.13
	G×E&Residuals	27.06	0.56
FWPB	Genotype	0.08277	0.00608	0.878927
	Environment	0.08012	0.03422
	G×E&Residuals	0.0567	0.0012
BW	Genotype	0.1623	0.013	0.743387
	Environment	0.3613	0.1544
	G×E&Residuals	0.311	0.0065
LP	Genotype	18.889	1.327	0.955115
	Environment	7.196	3.072
	G×E&Residuals	3.456	0.072
BPP	Genotype	2.722	0.249	0.431481
	Environment	34.427	16.239
	G×E&Residuals	8.611	0.199
SI	Genotype	1.2326	0.0879	0.929002
	Environment	0.7124	0.319
	G×E&Residuals	0.418	0.0092

## Sheet: Sheet1
Supplementary Table 6. Analysis of variance for 13 traits of 419 upland cotton.
Traits	Source	Sum of Squares	Mean Square	Variance ratio	P-value
FL	Genotype	11901	28.47	36.9	<0.001
	Environment	4290	390.01	505.41	<0.001
	Genotype × Environment	3497	0.77	1.68	<0.001
	Residuals	2518	0.68
FS	Genotype	6689	16	4.91	<0.001
	Environment	4657	423.33	129.89	<0.001
	Genotype × Environment	14777	3.26	1.98	<0.001
	Residuals	6060	1.65
M	Genotype	802.1	1.92	19.97	<0.001
	Environment	987.7	89.79	934.21	<0.001
	Genotype × Environment	435.3	0.1	1.25	<0.001
	Residuals	282.1	0.08
LU	Genotype	4360	10.43	9.49	<0.001
	Environment	2739	249.01	226.51	<0.001
	Genotype × Environment	4985	1.1	1.16	<0.001
	Residuals	3489	0.95
SBno	Genotype	994	2.4	1.62	<0.001
	Environment	19273	2141.4	1457.75	<0.001
	Genotype × Environment	5526	1.5	1.36	<0.001
	Residuals	3249	1.1
SBnode	Genotype	1310	3.1	4.82	<0.001
	Environment	14054	1756.8	2701.81	<0.001
	Genotype × Environment	2174	0.7	3.5	<0.001
	Residuals	601	0.2
FD	Genotype	22602	54	6.26	<0.001
	Environment	397168	36106	4193.17	<0.001
	Genotype × Environment	39687	9	1.8	<0.001
	Residuals	18965	5
GP	Genotype	49233	118	4.35	<0.001
	Environment	920373	83670	3092.3	<0.001
	Genotype × Environment	124303	27	2.25	<0.001
	Residuals	43425	12
FWPB	Genotype	444.2	1.063	18.76	<0.001
	Environment	369.7	33.61	539.3	<0.001
	Genotype × Environment	252.3	0.057	1.54	<0.001
	Residuals	134.5	0.037
BW	Genotype	945.1	2.26	7.28	<0.001
	Environment	1668.5	151.68	488.15	<0.001
	Genotype × Environment	1423.8	0.31	1.72	<0.001
	Residuals	689.3	0.18
LP	Genotype	96396	230.6	66.74	<0.001
	Environment	33200	3018.2	873.48	<0.001
	Genotype × Environment	15798	3.5	1.35	<0.001
	Residuals	9795	2.6
BPP	Genotype	17968	43	4.99	<0.001
	Environment	129901	14433	1676.15	<0.001
	Genotype × Environment	32395	9	1.5	<0.001
	Residuals	18626	6
SI	Genotype	6375	15.25	36.47	<0.001
	Environment	2989	298.93	714.83	<0.001
	Genotype × Environment	1744	0.42	1.27	<0.001
	Residuals	1085	0.33
