# Supplementary material for: Deep learning-based phenotype prediction analysis of genotype-environment interactions and mining of environmentally stable germplasm and elite loci in cotton
Source: Research Square preprint supplement (doi:10.21203/rs.3.rs-7483914/v1), 2025-09-11
Supplement: Supplementary file 5 [file 89e9578612ba5fa24d079730.xlsx]

## Sheet: 2014
Supplementary Table 5. The geo-meteorological characteristics of the six locations in 2014
Locations	Month	Latitude(°)	Longitude(°)	Altitude(m)	Daytime Precipitation(mm)	Nightly Precipitation(mm)	Daily Precipitation(mm)	Minimum Relative Humidity(%)	Average Relative Humidity(%)	Sunshine Hours(h)	Radiation(MJ/m2day)	Maximum Temperature(℃）	Mimimum Temperature(℃）	Average Temperature(℃）
AY	4	36.05	114.13	194.8	1.17	1.48	2.65	37.53	61.37	4.84	15.05	21.71	11.89	16.26
	5				0.67	0.42	1.09	20.1	39.71	7.11	20.19	29.71	19.97	23.78
	6				3.78	0.11	3.89	34.27	55.6	5.45	17.72	31.07	20.99	25.66
	7				2.2	2.02	4.22	44.55	67.97	5.44	17.45	31.82	22.63	26.73
	8				1.13	0.99	2.12	48.94	73.71	5.19	16.1	29.59	20.94	24.57
	9				3.96	2.49	6.45	54.17	77.2	2.92	10.87	25.01	17.04	20.4
	10				0.04	0.11	0.15	40.42	63.97	3.15	9.25	21.83	12.82	16.64
JZ	4	30.35	112.15	31.8	1.56	3.39	4.95	57.77	77.87	3.52	13.41	21.25	13.98	17.23
	5				1.93	1.43	3.36	48.94	74.68	3.7	14.5	26.45	18.11	21.7
	6				0.57	1.89	2.46	59.07	77.5	2.59	12.77	29.25	22.88	25.64
	7				2.33	2.04	4.36	62.45	81.55	6.41	19.37	31.7	24.24	27.55
	8				2.77	0.71	3.49	64.16	81.9	4.73	15.8	30.07	23.05	25.92
	9				1.59	1.66	3.25	66.43	84.1	3.35	12.21	26.77	20	22.81
	10				1.56	1.9	3.46	50.42	75.74	5.46	13.74	24.22	15.31	18.92
DH	4	40.15	94.68	1139	0	0	0	8	24.23	9.24	21.58	22.33	4.56	13.06
	5				0.16	0.39	0.55	7.81	28.77	10.93	26.19	26.61	8.54	17.91
	6				0.39	0.32	0.71	15.63	35.7	10.26	25.67	30.62	16.14	23.27
	7				0	0	0	16.32	37.42	11.12	26.76	33.65	18.05	26.14
	8				0.02	0.11	0.13	15.29	39.9	10.75	24.69	31.92	16.09	24.04
	9				0	0	0	13.93	41.37	9.68	20.38	29.68	10.15	17.93
	10				0	0.03	0.03	14.68	42.87	8.73	15.61	20.58	3.03	10.38
CZ	4	38.35	116.85	8	0	0.26	0.26	25.13	49.13	8.83	21.27	22.89	10.98	16.51
	5				0.33	0.82	1.15	21.06	43.16	10.82	26.28	29.41	16.8	22.93
	6				1.15	1.18	2.33	38.43	62.73	9.26	24.15	31.01	19.68	25.07
	7				0.45	1.92	2.37	43.26	65.65	7.56	20.92	33.1	23.95	28.22
	8				0.09	2.21	2.3	44.71	70.35	7.85	20.26	31.88	21.23	26.34
	9				0.28	0.26	0.54	45.03	73.53	5.96	15.23	26.7	16.74	21.19
	10				0.15	0.63	0.78	39.77	66.55	6.79	13.72	21.34	10.69	15.51
YC	4	33.43	120.2	2.5	0.31	1.4	1.71	49.57	75.97	6.44	18.09	20.12	11.19	15.17
	5				0.61	1.39	2	37.13	62.16	8.37	22.59	27.28	16.56	21.81
	6				2.6	1.86	4.46	57.53	79.47	4.47	16.07	27.56	20.13	23.16
	7				1.89	2.35	4.24	62.23	83	4.34	15.65	30.31	23.5	26.27
	8				6.94	3.34	10.27	67.74	86	2.91	12.44	28.44	22.42	24.88
	9				0.98	1.99	2.97	63.43	83.93	3.66	12.34	25.89	19.93	22.38
	10				0.11	0.35	0.46	51.52	76.06	6.62	14.75	22.73	13.82	17.8
XJ	4	40.55	81.26	1012.2	0	0	0	8.3	29.83	8.31	19.98	22.72	6.57	14.76
	5				0.01	0	0.01	7	31.03	9.75	24.17	28.87	11.19	19.9
	6				0.17	0.16	0.33	21.37	49.73	8.36	22.42	30.25	14.69	22.14
	7				0.02	0.12	0.13	20.26	48.74	10.71	26.02	33.54	17.39	25.01
	8				0.05	0.03	0.08	24.9	56.32	8.35	20.77	30.78	15.64	22.73
	9				0	0.06	0.06	26.27	60.3	8.63	18.76	26.83	11.65	18.49
	10				0.01	0	0.01	17.65	59.03	8.77	15.54	21.85	2.85	10.77

## Sheet: 2015
Supplementary Table 5. The geo-meteorological characteristics of the six locations in 2015
Locations	Month	Longitude	Latitude	Altitude(m)	Daytime Precipitation(mm)	Nightly Precipitation(mm)	Daily Precipitation(mm)	Minimum Relative Humidity(%)	Average Relative Humidity(%)	Sunshine Hours(h)	Radiation(MJ/m2day)	Maximum Temperature(℃）	Mimimum Temperature(℃）	Average Temperature(℃）
AY	4	36.05	114.13	194.8	0.1	0.71	1.71	32.67	54.7	6.11	17.3	21.34	10.86	15.65
	5				0.85	1.25	2.1	35.52	57.45	6.97	19.95	26.54	16.23	21.64
	6				0.87	1.36	2.23	33.4	52.6	5.2	17.28	31.41	21.23	26.08
	7				2.81	0.04	2.85	44.77	67.32	5.52	17.6	32.35	22.45	26.84
	8				1.49	0.48	1.97	50.29	74.32	4.69	15.26	30.93	21.71	25.56
	9				0.31	0.62	0.93	46.9	71.5	4.71	13.67	26.06	17.24	20.92
	10				0.36	0.25	0.61	34.52	55.42	4.48	11.19	21.99	11.61	15.99
JZ	4	30.35	112.15	31.8	1.57	1.89	3.46	55.7	78.93	4.99	16.02	20.96	12.29	16.35
	5				1.64	3.33	4.97	53.48	76.22	5.04	16.89	27.66	19.23	22.91
	6				4.09	2.84	6.93	67.93	85.3	3.28	13.98	28.56	21.78	24.55
	7				3.55	1.75	5.3	62.19	80.58	6.35	19.26	31.19	23.7	27.11
	8				1.63	3.05	4.68	55.35	78.74	8.37	22.12	32.19	24.16	27.57
	9				1.85	1.13	2.98	52.13	76.4	4.86	14.74	28.82	20.81	24.1
	10				1.82	0.48	2.3	44.55	74.1	5.95	14.4	24.7	15.26	19.16
DH	4	40.15	94.68	1139	0	0	0	10.5	28	9.45	21.96	22.68	5.71	14.03
	5				0.15	0	0.15	11.23	31.35	10.55	25.54	27.98	11.54	20.06
	6				0.11	0.32	0.43	15.37	35.1	9.89	25.04	30.54	16.23	23.79
	7				0.04	0.02	0.06	16.81	39.52	10.92	26.42	34.23	18.01	26.25
	8				0.04	0.01	0.05	12.74	33.52	11.28	25.56	33.31	15.74	24.64
	9				0.03	0.03	0.06	19.53	47.07	9.02	19.35	25.56	10	16.8
	10				0	0	0	14.1	43.06	9.31	16.37	19.84	2.05	9.45
CZ	4	38.35	116.85	8	0.13	1.45	1.58	32.83	59.17	8.28	20.46	21.03	9.28	14.87
	5				0.31	1.02	1.34	30.42	53.71	9.42	23.9	27.2	15.9	21.39
	6				0.95	0.6	1.56	30.07	54.4	7.82	21.68	31.64	19.76	25.6
	7				0.63	0.86	1.49	45.19	67.1	5.33	17.17	32.65	22.44	27.2
	8				3.51	0.52	4.03	50.26	72.22	7.11	19.02	21.86	22.11	26.58
	9				0.66	5.2	5.86	43.87	70.73	6.88	16.62	26.99	16.87	21.44
	10				0.28	0.43	0.71	37.58	61.16	7.25	14.35	21.09	10.05	15.11
YC	4	33.43	120.2	2.5	0.49	1.41	1.9	46.77	71.57	6.03	17.48	19.3	9.53	13.84
	5				2.34	1.13	3.47	49.23	74.13	6.22	18.82	24.38	15.41	19.34
	6				3.17	6.17	9.34	54.87	77.27	3.85	14.98	27.56	20.28	23.55
	7				5.56	1.96	7.52	62.68	83.45	4.42	15.78	29.79	23.24	26.05
	8				3.64	11	14.64	59.03	83.06	6.14	17.97	30.62	23.58	26.68
	9				1.15	1.89	3.04	53.7	80.47	6.54	17	26.92	19.23	22.7
	10				0.64	1.68	2.32	41.71	73.55	6.83	14.96	23.08	13.96	18.05
XJ	4	40.55	81.26	1012.2	0	0	0	10.03	32.9	8.1	19.72	24.31	8.03	16.12
	5				0.31	0	0.31	13.58	41.58	8.68	22.36	29.42	13.16	21
	6				0.39	0.11	0.5	21.33	48.3	8.64	22.89	30.51	15.44	22.7
	7				0	0	0	18.45	45.9	9.31	23.69	34.97	19.45	27.07
	8				0.17	0.11	0.28	25.9	55.84	5.98	16.87	30.92	16.89	23.27
	9				0.6	0.48	1.09	28.67	60.33	8.4	18.36	25.07	10.05	16.86
	10				0	0	0	19.03	59.23	8.64	15.39	21.16	2.69	10.41
