# Supplementary material for: Deep learning-based phenotype prediction analysis of genotype-environment interactions and mining of environmentally stable germplasm and elite loci in cotton
Source: Research Square preprint supplement (doi:10.21203/rs.3.rs-7483914/v1), 2025-09-11
Supplement: Supplementary file 6 [file 9346d8c3e3541927ed4a7912.xlsx]

## Sheet: Sheet1
Supplementary Table 9. The shared Main-SNPs associated with cross-trait categories using phenotype values of 419 upland cotton for GWAS
Cross-trait categories	Chromosome	Maker	Position (bp)	allele1	allele0	P-value	Locations
Fiber quality and fiber yield related traits	A07	A07_88736771	88736771	A	C	2.76145e-07	XJ
	A07	A07_88739140	88739140	G	C	3.05592e-07	XJ
	A07	A07_88739209	88739209	A	G	2.44742e-07	CZ, XJ
	A07	A07_88740254	88740254	T	C	4.01114e-07	XJ
	A07	A07_88740430	88740430	T	G	9.34201e-07	XJ
	A07	A07_88740922	88740922	A	C	5.96042e-07	XJ
	A07	A07_88740968	88740968	A	G	9.20625e-07	XJ
	A07	A07_88741590	88741590	A	G	8.58726e-07	CZ
	A07	A07_88741627	88741627	G	C	6.25265e-07	XJ
	A07	A07_88741628	88741628	T	A	6.25265e-07	XJ
	A07	A07_88743622	88743622	T	C	1.3156e-07	CZ
	A07	A07_88760460	88760460	T	C	8.18949e-07	XJ
	A07	A07_90498854	90498854	A	G	5.99485e-07	XJ
	A07	A07_90587279	90587279	T	C	1.72822e-09	CZ, DH, XJ
	D02	D02_5855371	5855371	A	G	7.00991e-08	YC
	D02	D02_5888325	5888325	C	T	1.74521e-07	YC
	D02	D02_5888347	5888347	C	T	2.62126e-07	YC
	D02	D02_5888929	5888929	G	T	7.4927e-07	YC
	D11	D11_24486403	24486403	C	T	6.9649e-07	DH, YC
	D11	D11_28946596	28946596	A	G	8.85393e-07	YC
	D11	D11_28959679	28959679	T	C	9.014e-07	YC
	D11	D11_28972918	28972918	G	A	4.33394e-07	YC
	D11	D11_28990696	28990696	G	A	5.57897e-07	YC
	D11	D11_29095157	29095157	C	T	4.99832e-07	YC
Fiber quality and growth period related traits	D03	D03_39082094	39082094	T	C	4.08147e-07	CZ
