# Supplementary material for: Deep learning-based phenotype prediction analysis of genotype-environment interactions and mining of environmentally stable germplasm and elite loci in cotton
Source: Research Square preprint supplement (doi:10.21203/rs.3.rs-7483914/v1), 2025-09-11
Supplement: Supplementary file 8 [file c761e37f9b8cfc2c06b9140d.xlsx]

## Sheet: Sheet1
Supplementary Table 13. The phenotypic plasticity parameters of 13 traits of 419 upland cotton
Samples	BPP	BW	FD	FL	FS	FWPB	GP	LP	LU	M	SBno	SBnode	SI
B001	2.65016	-0.0422219	1.13281	0.00174362	0.385558	-0.0522542	-1.37825	-0.667109	-0.0251424	0.0969328	0.836148	0.522613	0.106451
B002	3.50552	0.00241493	0.718016	-0.0158726	0.223315	-0.0555223	-1.87695	-0.972779	0.0329532	0.126954	0.843284	0.407445	0.134299
B003	3.00056	-0.0648357	1.54158	-0.140562	0.254027	-0.0701425	-1.55725	-0.479833	-0.0299553	0.139475	0.837128	0.326747	0.102601
B004	2.74401	-0.145902	1.16856	0.118667	0.110398	-0.0811467	-1.10529	-0.78582	0.244104	0.0806533	0.891901	0.462945	0.140532
B005	2.60871	-0.062133	1.54222	-0.242886	-0.00245694	-0.0602396	-1.57277	-0.267825	-0.140719	0.128745	0.912357	0.423924	0.0136973
B006	2.4176	0.0206753	1.46952	0.0106154	0.396185	-0.0335178	-1.95434	-0.621574	0.185996	0.132017	0.673456	0.364598	0.110515
B007	2.31126	-0.0412023	0.0608656	-0.0507772	0.174842	-0.0387638	-1.05738	-0.514846	0.294695	0.0809812	0.764425	0.386988	0.285938
B008	2.20244	-0.0962815	1.15607	0.252009	0.333562	-0.0824804	-1.17117	-0.729073	0.275583	0.0158116	0.638364	0.487001	0.031052
B009	2.70008	-0.124129	1.03792	0.114135	0.6867	-0.0782626	-1.4957	-0.123746	0.301512	0.153363	0.837833	0.335706	0.197722
B010	1.99014	-0.126823	1.62941	0.295104	0.226681	-0.0841171	-0.455267	-0.698378	-0.060255	0.0757265	0.563503	0.552566	0.181293
B011	2.26796	-0.0355042	1.29533	0.0408561	0.494188	-0.0390771	-1.20443	-0.842719	0.130219	0.0502933	0.644525	0.483242	0.112958
B012	1.64893	-0.091951	1.53909	-0.0548687	-0.0776081	-0.105852	-1.00734	-1.06125	0.0465262	0.0546765	0.45598	0.601428	0.118495
B013	2.50445	-0.106959	1.37948	0.110131	0.300979	-0.0915521	-0.563076	-0.764073	0.0309612	0.125117	0.746799	0.470051	0.136669
B014	2.49307	-0.131739	0.867382	0.168688	0.415446	-0.0622926	-1.37875	-0.420132	0.153569	0.134199	0.827098	0.502318	0.115693
B015	1.89599	-0.00687178	1.72634	0.289502	0.411074	-0.0642561	-0.143178	-0.87836	0.381135	0.0449547	0.434382	0.417013	0.356335
B016	2.3218	-0.0242843	0.893355	0.21876	0.201382	-0.0365748	-1.41195	-0.33631	0.115342	0.157179	0.751834	0.402877	0.130412
B017	2.71331	-0.0776419	1.57846	-0.0146279	-0.153635	-0.0838825	-0.727156	-0.89974	0.0739839	0.108773	0.837325	0.507705	0.201563
B018	2.83872	-0.140555	0.570554	0.138687	0.262754	-0.111441	-1.46902	-1.04109	0.281028	0.0979416	0.918486	0.464761	0.197966
B019	2.13349	-0.0759292	0.610267	-0.259614	0.0269617	-0.0715959	-1.50744	-1.04268	0.121292	0.109128	0.92862	0.415612	0.0798763
B020	2.96681	0.00160673	0.867222	0.11536	0.209036	-0.0159287	-0.0027802	-0.299766	0.128884	0.165024	0.809973	0.46042	0.136998
B021	2.82701	-0.143062	0.923184	-0.0160029	0.387165	-0.0838068	-1.77313	-0.0655204	0.204359	0.150731	0.706305	0.419231	0.169521
B022	2.37567	-0.146194	1.31348	-0.0430926	-0.0854328	-0.086621	-0.73879	-0.460585	0.0239348	0.169403	0.81844	0.383944	0.0422438
B023	2.52468	-0.220736	1.21307	-0.191664	0.194416	-0.0940287	-1.14867	-0.228784	0.068667	0.143549	0.568753	0.504897	0.117208
B024	3.027	-0.115533	1.10961	-0.0505502	0.403382	-0.0727542	-1.33718	-0.137801	0.248657	0.106963	0.970373	0.464567	0.0386579
B025	2.28936	-0.0737327	1.03638	0.0641284	0.47061	-0.0868443	-0.99266	-1.17345	0.244376	0.13774	0.716477	0.3436	0.231473
B026	2.4057	-0.153976	1.54632	0.256706	0.63554	-0.0970861	-1.10133	-0.461934	0.284899	0.152901	0.82621	0.434263	0.265849
B027	3.10559	-0.0954924	0.932244	-0.00880467	0.170925	-0.0817303	-1.07921	-0.311406	0.170019	0.17387	0.926239	0.408995	0.178093
B028	2.61767	-0.0953249	1.02158	0.210618	0.276334	-0.068577	-2.06627	-0.151723	0.113458	0.189181	0.856343	0.434706	0.230613
B029	2.93884	-0.0114529	0.84147	-0.130201	0.289735	-0.0374576	-1.31209	-0.716996	0.15228	0.0946366	0.854698	0.465163	0.180158
B030	2.50836	-0.115471	0.97267	-0.107399	0.0384375	-0.0830992	-1.58943	-0.54737	0.0464042	0.214014	0.843673	0.542837	0.12727
B031	2.22334	-0.0432891	1.22932	0.0616119	0.0435096	-0.0488332	-1.55835	-0.210436	0.309173	0.154818	0.63905	0.449071	0.189452
B032	2.14458	-0.000290677	1.56555	0.141902	0.450009	-0.0441976	-1.60678	-0.663346	0.248007	0.149663	0.711972	0.555854	0.101925
B033	1.9435	-0.123013	1.45748	0.0710517	0.502968	-0.0850825	-0.28401	-0.550865	0.0528355	0.165296	0.643281	0.291291	0.114392
B034	2.64608	-0.0694553	1.29994	-0.0282021	0.134678	-0.052313	-0.583805	-0.666179	0.122375	0.150155	0.896052	0.471737	0.120749
B035	2.3385	-0.0359357	1.17147	-0.0388618	0.309806	-0.0823377	-1.21857	-0.872306	0.159705	0.0520617	0.878615	0.446497	0.217248
B036	2.78826	-0.0862266	0.694251	0.320983	0.196658	-0.0648865	-1.58293	-0.334358	0.2068	0.0534645	0.662565	0.430949	0.222522
B037	2.24315	-0.129798	0.739628	-0.213919	0.25326	-0.106001	-1.28792	-0.88581	0.0381883	0.0349196	0.911472	0.47614	0.0141506
B038	2.93838	-0.138809	1.46257	0.0688444	0.304624	-0.0995232	-1.34168	-0.720797	0.0440629	0.0814408	0.922338	0.572984	0.0892086
B039	1.86982	-0.00291115	0.975602	-0.0504793	0.184276	-0.038631	-1.91316	-0.729008	0.17119	0.151261	0.526515	0.314909	-0.0553784
B040	2.9068	-0.0502001	1.37364	0.0169472	0.339545	-0.0540433	-1.15006	-0.320027	0.302055	0.129107	1.04096	0.471684	0.074662
B041	2.28417	-0.0259597	0.490724	-0.0201272	0.2745	-0.0277147	-1.93888	-0.535273	0.0713772	0.27351	0.81906	0.456155	0.261519
B042	2.28638	-0.0354795	0.964155	0.111304	0.285448	-0.0691268	-1.07834	-0.919721	-0.0197637	0.039446	0.695628	0.325356	0.129968
B043	2.11891	-0.155571	1.41446	0.159859	-0.333927	-0.113734	-0.480277	-0.59775	0.151879	0.0733138	0.848119	0.539028	-0.0732582
B044	3.64638	-0.0707629	0.701187	0.0179448	0.0736164	-0.0509143	-1.45083	-0.610597	-0.109741	0.110985	1.11885	0.509018	0.0915437
B045	2.29982	-0.032038	1.53744	0.161879	0.235219	-0.0580516	-0.881969	-0.363932	0.306258	0.0896945	0.833218	0.493753	-0.0584419
B046	2.8984	-0.120509	1.17313	-0.058205	-0.089988	-0.062146	-0.992262	-0.292075	0.0746991	0.119566	0.747385	0.595022	0.0767209
B047	2.97132	-0.108441	1.27855	0.156406	0.249755	-0.0592694	-0.595735	-0.458157	0.380937	0.22854	1.00343	0.540576	0.244573
B048	2.60449	-0.00881914	1.1601	0.371235	0.301975	-0.0318744	-1.33397	-0.505856	0.313881	-0.0150474	0.836544	0.639111	0.057429
B049	2.73426	-0.0438202	2.08434	0.0843834	0.182605	-0.0732398	0.247605	-1.21257	0.220012	0.101257	0.554026	0.435743	0.280526
B050	2.26234	-0.0321042	1.30738	0.201438	0.342336	-0.0452153	-1.5036	-0.49959	0.0035803	0.112347	0.693325	0.423166	0.184301
B051	1.7071	0.028572	0.833292	0.0658861	0.170017	-0.0187515	-2.36851	-0.598768	0.325034	0.125485	0.808976	0.296584	0.279132
B052	3.09615	-0.0973559	0.504958	0.0300626	0.240557	-0.104452	-1.99557	-0.80592	-0.0679253	0.0569483	1.0964	0.309827	0.0656788
B053	2.30812	-0.0281272	1.56688	0.206447	0.126243	-0.0685404	-0.928078	-0.787294	0.494691	0.122951	0.706602	0.455304	0.21421
B054	2.6859	-0.0971362	1.14582	0.131872	0.400003	-0.0522471	-1.57366	-0.242881	0.638979	0.167316	1.05951	0.395738	0.169632
B055	2.85531	-0.078582	1.77445	0.393226	0.325185	-0.119449	-0.753241	-1.27988	0.134755	-0.0110135	0.586498	0.593681	0.201782
B056	2.12247	0.0218671	0.0811441	0.0543029	0.326818	-0.023309	-2.94581	-0.416144	-0.0997706	0.15039	1.052	0.326404	0.0507373
B057	2.94871	-0.0556033	1.38383	-0.0654383	0.189867	-0.00639004	-1.4815	-0.168016	0.11626	0.162928	0.868571	0.422902	0.111895
B058	2.77282	-0.107321	0.609716	0.0488332	0.189304	-0.0778136	-1.52746	-1.05965	0.130117	-0.0262787	0.719748	0.409535	0.116679
B059	2.98899	-0.124273	1.45923	0.0335848	0.49327	-0.083131	-1.32952	-0.927868	0.0561179	0.0603594	1.08845	0.466436	0.242889
B060	2.76989	-0.0764943	1.64775	0.013194	0.237289	-0.0751932	-0.573813	-0.616865	0.396552	0.0780049	0.705253	0.438949	0.175665
B061	2.69028	-0.189349	1.47215	-0.0949386	-0.212278	-0.104253	-1.31261	-0.95812	-0.0660057	0.0209112	0.885602	0.394156	0.142313
B062	2.69039	-0.10065	0.910716	-0.0907522	0.496409	-0.0798353	-0.297827	-0.551121	0.360616	0.0864301	0.65163	0.417838	0.0312476
B063	2.36648	-0.0668784	0.707178	-0.101129	0.597168	-0.0835075	-2.07645	-1.23047	0.019168	0.100033	0.881881	0.576757	0.363332
B064	1.80431	-0.0573148	0.659128	0.08055	0.318319	-0.060363	-2.1152	-0.742049	0.125831	0.0663846	0.669056	0.388626	0.135441
B065	1.20258	-0.146385	1.16512	0.0509684	0.0932255	-0.100738	-0.814555	-0.389377	0.150905	0.0807071	0.533183	0.474047	0.159022
B066	2.07274	-0.0440336	1.4679	-0.0205156	-0.0876987	-0.0740586	-1.57179	-0.515988	0.114492	0.0436468	0.754205	0.280999	0.123077
B067	2.26539	-0.144878	1.41591	-0.189869	0.0791716	-0.0857751	-1.70174	-0.471377	0.139552	0.104751	0.668959	0.409794	0.190705
B068	1.92788	-0.280614	1.33925	0.100618	0.429114	-0.186141	-0.617133	-1.35622	0.017201	0.0634213	0.827611	0.358901	0.344623
B069	2.6267	-0.213825	1.04337	-0.23003	-0.399976	-0.13479	-0.357076	-0.614841	0.107598	0.103306	0.923379	0.495857	0.137465
B070	2.17917	-0.0464198	1.2975	0.00381991	0.171178	-0.099977	-1.21602	-0.737966	0.0303657	0.111982	0.792473	0.3074	0.135438
B071	2.791	-0.0667902	1.07509	-0.129179	-0.088839	-0.0253117	-1.15621	0.0355522	0.0965357	0.123959	0.958456	0.448865	0.113624
B072	2.76035	-0.112392	1.43006	-0.147806	-0.173025	-0.063328	-0.470421	-0.267242	-0.0760495	0.0726194	0.761989	0.564969	8.94008e-05
B073	2.49004	-0.0917315	1.43726	0.030206	0.15701	-0.0669672	0.336232	-0.601832	0.358939	0.105174	0.950214	0.343588	0.0618803
B074	3.34477	-0.0206661	0.972352	0.149162	0.401686	-0.0375684	-1.761	-0.482807	0.305737	0.111421	0.81466	0.379042	0.200153
B075	2.16018	-0.076692	1.83597	0.0983526	0.148906	-0.0645875	-0.593696	-0.478224	0.179303	0.0869436	0.73693	0.339009	-0.0461922
B076	2.48051	-0.112229	0.704953	0.0883621	0.438484	-0.071222	-1.0393	-0.437548	0.292227	0.164651	0.890453	0.389484	0.130591
B077	2.09064	0.0232997	0.872297	-0.00228011	0.163976	-0.0574443	-1.1341	-0.855827	0.307245	0.144768	0.632302	0.297654	0.343514
B078	2.15691	-0.0828968	0.679641	0.0777832	0.154152	-0.0930937	-1.24589	-0.920241	-0.101084	0.0766924	0.70049	0.368971	0.140234
B079	2.72387	0.00463459	1.00637	-0.0425453	0.102749	0.000853514	-1.79638	-0.613798	0.288366	0.185094	0.613196	0.44488	0.252116
B080	3.25275	-0.0991902	1.24661	-0.05715	0.036602	-0.0653748	-1.34567	-0.656466	0.02859	0.0866402	0.830849	0.46918	0.0891907
B081	2.36257	-0.0123924	0.756317	0.158913	0.281994	-0.0588231	-1.33059	-0.835821	0.315665	0.0740429	0.703926	0.308035	0.203697
B082	2.9613	-0.0975418	1.44347	0.0960618	0.433718	-0.0689253	-1.35157	-0.563524	-0.0295419	0.134967	0.842047	0.422655	0.151748
B083	2.43227	-0.0707931	1.35516	0.20656	0.0718568	-0.0849569	-0.983832	-0.824163	0.124838	0.0196484	0.643028	0.44588	0.0978354
D001	3.37995	-0.0759935	1.03992	0.00803229	0.164303	-0.075625	-0.914395	-0.460619	0.287004	0.255387	0.892945	0.5031	0.346104
D002	2.08365	-0.0764685	1.77017	0.0687523	0.473376	-0.0626621	-1.547	-0.575511	0.216106	0.169856	0.570133	0.376796	0.199967
D003	2.33515	-0.0719162	1.74397	-0.034875	0.222195	-0.0512884	-0.28293	-0.537885	0.236641	0.10852	0.554083	0.300475	0.0872028
D004	2.39185	-0.0883811	0.672985	0.210551	0.254148	-0.0448892	-1.38993	-0.100693	0.189276	0.134518	0.960684	0.406363	0.0605747
D005	2.37169	-0.123574	0.88099	0.148288	0.395695	-0.0839746	-0.911015	-0.649043	0.0907684	0.142624	0.63966	0.508494	0.133487
D006	2.64874	-0.0438163	1.31488	0.24304	0.0924385	-0.0740328	-0.95786	-0.539021	0.301284	0.0398332	0.882765	0.519874	0.134683
D007	2.81618	-0.159771	0.647097	0.204175	0.0616694	-0.0865254	-0.987818	-0.717529	0.156419	0.14201	0.865837	0.405951	0.145347
D008	2.24381	-0.0896453	1.2088	0.0991257	0.370213	-0.0805191	-1.51978	-0.626913	0.171861	0.186325	0.884712	0.491478	0.260772
D009	2.93601	-0.0229592	1.74397	0.291598	0.300459	-0.0146066	-0.666201	-0.160475	0.3117	0.159799	0.763212	0.467324	0.172102
D010	2.48866	-0.0052892	1.5898	-0.0201442	0.0290196	-0.0501416	-1.28831	-0.675056	-0.0403489	0.148764	0.709723	0.499304	0.143149
D011	1.77419	0.108113	0.972674	-0.0427609	0.209189	0.0220637	-1.63819	-0.568646	0.100278	0.101887	0.700963	0.369788	0.157335
D012	2.2443	-0.0787006	1.59659	0.0805937	-0.0429638	-0.0719905	0.147431	-0.587147	0.0205615	0.0389929	0.837661	0.414725	0.236311
D013	2.14546	-0.0373166	1.22497	0.127397	0.374144	-0.0821836	-0.66467	-1.10565	0.1154	0.0568369	0.748009	0.468033	0.0866426
D014	2.69811	-0.0128179	1.16308	0.388406	0.371149	0.0130083	-0.929594	-0.0667616	0.657801	0.137037	0.55429	0.438942	0.123025
D015	3.59491	-0.137797	0.830197	0.189221	0.0259099	-0.0986437	-1.39928	-0.5191	0.256606	0.0909638	1.0284	0.473038	0.211803
D016	2.37691	-0.185399	1.56144	-0.0284122	-0.0330636	-0.104343	-0.924509	-0.340783	0.0911517	0.158144	0.923139	0.538515	0.0825824
D017	3.38623	-0.131176	1.16356	0.0216637	0.151923	-0.0895794	-0.570946	-0.711237	0.0896511	0.104549	0.773181	0.525001	0.210257
D018	2.52922	-0.104125	0.789086	-0.0342224	0.165182	-0.082729	-1.03472	-0.904313	0.0758471	0.0405979	0.916178	0.446357	0.171518
D019	2.41331	-0.0973117	1.12072	0.0954255	-0.0264418	-0.0823553	-1.65817	-0.653803	0.277945	0.203355	0.544052	0.481243	0.106269
D020	2.33695	-0.106532	1.05129	0.191831	0.245541	-0.0687643	-1.08655	-0.431248	0.393107	0.145443	0.698131	0.362476	0.221214
D021	2.14053	-0.070032	1.38532	0.167976	-0.16329	-0.0553467	-1.16746	-0.358469	0.178749	0.0854696	0.730002	0.592422	0.057641
D022	2.3091	-0.158079	1.79395	-0.00140682	0.107951	-0.0943958	-0.606226	-0.824126	0.200718	0.147423	0.892485	0.367665	0.15706
D023	2.21104	-0.0472656	0.298258	-0.159569	0.0183344	-0.0674104	-1.70446	-0.542308	0.117267	0.0502338	0.534862	0.455081	-0.0532708
D024	2.65051	-0.0288074	1.14239	-0.0966463	0.183078	-0.0177716	-0.944025	-0.380515	0.278184	0.120754	0.867517	0.400287	0.182067
D025	2.74903	0.0151033	1.2664	0.0205767	0.469489	-0.0559373	-0.8962	-0.922305	0.0162299	0.0768134	0.813772	0.492176	0.115327
D026	2.51621	-0.043677	1.5272	-0.170995	0.169871	-0.050709	-0.0611523	-0.556624	0.235858	0.0972162	0.592635	0.310785	0.0101762
D027	2.18721	-0.0611056	0.732854	0.0684472	0.190233	-0.0804608	-1.26113	-0.905743	0.371655	0.0705808	0.523597	0.372143	-0.0095809
D028	2.24416	-0.0354209	1.71287	0.164411	0.33143	-0.0706324	-1.60113	-0.959938	0.352322	0.0444722	0.643047	0.349058	0.160713
D029	1.88128	-0.132808	1.02714	-0.0455982	-0.25509	-0.109661	-0.564026	-0.881349	0.21671	-0.0343218	0.696306	0.385174	0.226261
D030	2.22349	-0.111578	2.17061	0.255018	0.300561	-0.0663038	0.0412085	-0.408286	0.238287	0.212093	0.824839	0.400168	0.0787858
D031	2.28917	-0.152153	1.01808	-0.0546767	0.248883	-0.103205	0.0272449	-0.966933	0.031107	0.0402598	0.577886	0.420678	0.0678705
D032	2.38063	0.0341403	1.07561	0.0617696	0.293056	-0.0239362	0.135364	-0.712035	0.285377	0.0964819	0.963076	0.354467	0.0949301
D033	2.46194	-0.0489888	1.58759	-0.0544831	0.136842	-0.0664349	-1.41149	-0.864462	0.101667	0.104783	0.977604	0.371504	0.133823
D034	2.08998	-0.0780342	1.2582	0.0391431	0.183307	-0.0636199	-0.841984	-0.484916	0.0153703	0.177323	0.913803	0.413507	0.159413
D035	1.7869	-0.0656579	1.19681	0.268697	0.352309	-0.0525551	-1.03943	-0.57491	0.180387	0.00891144	0.666294	0.290119	0.050495
D036	1.99844	-0.181508	0.845889	0.0913749	0.449581	-0.0781488	-0.394723	-0.510151	-0.0182796	0.134901	0.443193	0.233161	0.0521991
D037	1.95162	-0.0874475	1.34531	0.104092	0.295123	-0.0635723	-1.78434	-0.526111	0.383702	0.0842214	0.744936	0.272206	0.0799227
D038	2.72923	-0.0496734	0.730358	0.124122	0.110142	-0.0245613	-1.45809	-0.543917	0.420354	0.213225	0.734473	0.50004	0.155179
D039	2.85733	-0.11863	1.60136	0.0439875	0.367819	-0.0304465	-0.351496	-0.480809	0.202223	0.170656	0.9696	0.396928	0.250174
D040	1.7333	-0.0329087	1.28718	0.071981	0.180977	-0.030035	-0.903145	-0.365951	0.0466793	0.167015	0.882796	0.415988	0.134023
D041	1.96713	-0.110165	1.6746	0.0198063	0.602326	-0.0675587	-0.436743	-0.700438	0.175543	0.125759	0.610492	0.418895	0.274841
D042	2.23659	-0.0343242	1.47743	-0.101878	0.335856	-0.0465556	-0.478185	-0.631366	0.0989633	0.0845579	0.627235	0.44857	0.235406
D043	2.42657	-0.10785	0.917036	-0.0562959	0.0823759	-0.087408	-1.36265	-0.867238	0.0521109	0.116323	0.876755	0.44295	0.18344
D044	2.52138	0.0082657	1.8162	0.0329574	0.0086184	-0.0370319	-0.601987	-0.474305	0.284086	0.153354	0.681526	0.425787	0.0249603
D045	1.70136	-0.189279	2.16851	-0.0425979	-0.100491	-0.138307	0.548508	-0.908819	0.0836011	-0.00412731	0.59362	0.500564	0.216193
D046	2.45651	-0.1588	1.53465	-0.105826	0.189144	-0.0972782	-0.642912	-0.497799	-0.0800092	0.13273	0.517483	0.471208	0.165364
D047	2.03911	-0.145615	2.03957	0.0578291	0.261685	-0.0790135	-0.0805176	-0.530123	0.181845	0.168018	0.62099	0.471476	0.192145
D048	2.10292	-0.0751172	0.837675	-0.0790784	0.0057056	-0.0631415	-1.64121	-0.921334	-0.254772	0.0758249	0.716368	0.519552	0.107915
D049	1.59258	-0.0533559	1.3574	0.126057	0.222761	-0.0557579	-0.635189	-0.368158	0.38334	0.123084	0.66774	0.587041	0.161629
D050	2.5951	-0.0731439	0.658245	0.198265	0.506482	-0.0580391	-1.06059	-0.480253	0.14686	0.13393	0.886098	0.302982	0.234588
D051	3.02645	-0.0646636	1.29719	0.0930561	0.338509	-0.061602	-1.20929	-0.512525	0.284006	0.104231	0.800286	0.469953	0.163388
D052	2.17658	-0.0244767	1.85291	0.296959	0.312081	-0.0283194	-0.0692169	-0.490396	0.40674	0.120178	0.672971	0.439037	0.164561
D053	2.58287	-0.075523	0.566832	0.0176303	0.287053	-0.085643	-1.57701	-0.471704	0.0894092	0.160568	0.737241	0.344529	0.238667
D054	3.6258	-0.121478	0.82516	-0.0258191	-0.0771125	-0.0871076	-1.58192	-0.616026	0.0452552	0.0509011	1.19569	0.380599	0.196966
D055	2.52476	-0.194709	1.26543	0.0521008	0.157869	-0.149961	-2.0592	-1.36674	0.146427	0.0437716	1.01113	0.390917	0.107847
D056	2.88858	-0.146188	0.681366	0.0947377	0.0302582	-0.111709	-1.14618	-1.04283	0.158402	0.0434378	0.927894	0.323805	0.247799
D057	2.32865	0.0146	1.61622	0.0924535	0.239972	-0.00849373	-0.729445	-0.403079	0.211464	0.103376	0.727358	0.554985	0.0501641
D058	2.72334	-0.00764294	0.661596	0.0737816	0.252097	-0.04816	-1.34958	-0.740248	0.167493	0.174999	1.11987	0.472534	0.345364
D059	2.44385	-0.106008	1.47523	-0.187715	0.207774	-0.131739	-0.535505	-0.752281	0.0949997	-0.0528728	0.622704	0.400788	0.223775
D060	2.47721	-0.195819	0.978431	0.00611492	0.0937887	-0.102075	-1.72502	-0.703522	0.0929182	0.113565	0.833326	0.448078	-0.00436873
D061	1.82898	-0.0882106	1.05997	-0.0910117	0.012875	-0.0545874	-0.398645	-0.552899	0.0364526	0.0833621	0.783947	0.425505	0.207335
D062	1.56505	-0.0515866	1.04688	0.137241	0.26102	-0.053832	-1.34967	-0.783174	0.0454159	0.0756423	0.652646	0.409917	0.130599
D063	1.18246	-0.11132	1.62595	-0.0138833	0.413632	-0.104393	-0.461289	-0.813989	0.190511	0.0499395	0.861994	0.407225	-0.0339945
D064	1.81753	-0.0723929	0.608837	0.0941503	0.247735	-0.0748454	-0.53987	-0.683559	0.0997736	0.0794604	0.578458	0.337833	0.074389
D065	2.30806	-0.142464	1.35533	0.0173825	0.212002	-0.104707	-1.1225	-0.97668	0.0972871	0.0355667	0.780597	0.424509	-0.0808823
D066	2.08026	-0.135827	1.75218	0.215324	0.115736	-0.0970463	-0.274612	-0.608207	0.347821	-0.0340305	0.494956	0.244743	0.270869
D067	2.24226	-0.0782618	1.53528	0.0206825	-0.0264983	-0.0842909	-0.846253	-1.11047	0.104783	0.0370175	0.5582	0.387905	0.113701
D068	1.70232	-0.181929	1.89247	0.0494746	0.0539468	-0.124298	0.659832	-1.06226	0.238784	0.0154726	0.504985	0.371043	0.0491941
D069	1.8431	-0.0768123	1.3793	0.00863263	-0.0182099	-0.090379	-0.43644	-1.0975	-0.0803293	0.049645	0.55924	0.465195	0.28061
D070	2.49393	0.0157733	1.06071	-0.0484352	0.0393848	-0.059527	-0.574614	-1.17352	0.0181941	0.0669311	0.494583	0.361052	0.221099
D071	2.29454	-0.00572107	0.996137	-0.0248779	0.00657966	-0.0237547	-1.60742	-0.0577069	0.24523	0.209997	0.798119	0.371518	0.174692
D072	1.94892	-0.154529	1.01932	-0.149917	0.170688	-0.0803731	-1.21615	-0.671003	0.00497856	0.0362318	0.602939	0.370802	0.0490771
D073	2.4064	-0.110927	1.17844	0.164355	0.365053	-0.0865792	-0.75395	-0.56338	0.132796	0.111863	0.743695	0.313057	0.0151869
D074	2.94257	-0.0719769	1.688	-0.0470044	-0.205402	-0.0864622	-0.629969	-0.599328	0.138133	0.0384901	0.960311	0.354472	-0.0354094
D075	2.67825	-0.0554656	0.430039	0.0206178	-0.046311	-0.0607087	-2.16311	-0.55754	-0.028318	0.112668	0.888907	0.370547	0.169303
D076	2.20733	-0.168768	1.51365	0.0193875	0.225696	-0.0918894	0.311424	-0.483655	0.352421	0.104453	0.612867	0.375269	0.155741
D077	2.00223	-0.201285	0.832978	-0.0513166	0.115814	-0.104306	-0.676946	-0.69595	0.371886	0.105663	0.573042	0.435205	0.216182
D078	2.87293	-0.241316	1.37912	-0.0208897	0.224137	-0.131162	0.159416	-0.62112	0.0960066	0.01928	0.962375	0.305735	0.0833803
D079	1.97726	-0.0454697	1.54336	-0.0375279	0.210207	-0.074555	-0.867489	-0.822686	-0.0088516	0.103945	0.721737	0.267341	0.244655
D080	2.27196	-0.0998984	1.69579	0.214292	0.241075	-0.0776022	-1.08972	-0.812091	0.449621	0.0313069	0.664912	0.355517	0.0104653
D081	2.2531	-0.134321	1.05342	0.0838628	-0.0458308	-0.0546683	-0.643203	-0.464669	0.114427	0.243299	0.737944	0.447564	0.280987
D082	2.28428	-0.0428882	1.51246	0.110947	0.249783	-0.0661563	-2.22552	-0.772134	0.242276	0.0602839	0.559274	0.34134	0.077653
D083	2.89732	-0.0733469	1.21331	-0.0851705	0.138123	-0.0595577	-1.13349	-0.281134	-0.0522039	0.125507	1.05009	0.538344	0.0495923
D084	2.89062	-0.116889	1.26707	0.0338515	0.202497	-0.0672886	-1.78444	-0.335355	-0.0651851	0.127872	1.025	0.51886	0.0821333
D085	2.55277	-0.0571487	0.945034	-0.0394991	-0.0722778	-0.0459646	-1.15924	-0.805346	0.144363	0.17004	1.06879	0.396099	0.124553
D086	2.33361	-0.050758	1.23806	-0.0218716	0.421383	-0.0406886	-0.43332	-1.14567	0.19221	0.0980898	0.597042	0.397685	0.243627
D087	2.31371	-0.0943467	1.53208	0.0422446	0.541568	-0.0746372	-0.386232	-0.729977	0.101257	0.0552075	0.822629	0.429569	0.0202495
D088	2.36563	-0.0338922	0.953738	0.102547	0.186878	-0.0391419	-1.43378	-0.408093	-0.0962723	0.166691	0.696344	0.378903	0.2084
D089	2.76396	-0.0492093	1.17203	-0.0499937	0.220078	-0.030718	-0.587791	-0.489605	0.0091589	0.101277	0.745827	0.376117	0.098404
D090	2.44191	-0.124874	1.51642	-0.0268458	0.112947	-0.0899231	-0.607598	-0.470096	0.0296998	0.124883	0.650103	0.310185	0.0934604
D091	2.38872	-0.122787	1.04494	0.114566	-0.0198144	-0.0834	-0.792148	-0.636405	0.165425	0.117207	0.762264	0.336952	0.175365
D092	2.68024	-0.0352392	1.41274	0.166618	0.449468	-0.0660184	-1.51942	-0.789233	0.160738	0.117726	0.829646	0.477332	0.135128
D093	2.3658	-0.105878	0.818535	0.0324535	0.530215	-0.0917085	-1.87096	-0.679046	0.0264788	0.0834839	0.540169	0.331184	0.139178
D094	2.35682	-0.102175	1.03128	0.12803	0.37463	-0.0828704	-1.87601	-0.727057	0.305041	0.0729131	0.998226	0.389505	0.116426
D095	2.47692	-0.0457093	0.771807	0.00228694	0.212312	-0.0649682	-1.8684	-0.941151	-0.0172743	0.00849657	1.03395	0.27661	-0.00381063
D096	2.62361	-0.0843066	1.74195	0.10267	0.407896	-0.0803171	-0.429966	-0.769193	0.275475	0.0910568	0.645711	0.314283	0.192014
D097	2.16049	-0.164001	1.27517	0.234475	0.285438	-0.128282	-1.15244	-0.81675	0.252314	0.105758	0.566109	0.498068	0.130898
D098	2.18816	-0.0575362	1.16389	0.0876179	0.427786	-0.0262508	-0.919539	-0.159004	0.266886	0.148145	0.799265	0.204844	0.0798281
D099	2.54471	-0.0701041	0.837806	0.243283	0.0259334	-0.0760571	-1.62261	-0.809636	0.0862585	0.0838553	0.75081	0.315543	0.212602
D100	2.45289	-0.0754335	1.47326	-0.00355326	0.175753	-0.0746855	-0.806741	-0.828026	0.025367	0.0502511	0.817961	0.423819	0.228365
D101	2.26834	-0.00117038	1.22336	0.208582	0.28694	-0.051049	0.00148211	-0.849308	0.174869	0.0871925	0.513903	0.338228	0.213075
D102	2.40406	-0.107997	1.13883	-0.019524	0.233707	-0.0714781	-0.748434	-0.629052	0.0221049	0.134153	1.05454	0.472962	0.0855974
D103	2.82023	-0.113046	1.1197	0.214822	0.477086	-0.0474488	-0.474211	-0.781114	0.490114	0.0533356	1.13832	0.540512	0.0757726
D104	2.89175	-0.00410209	1.79108	0.226632	0.283124	-0.0603773	-0.986759	-0.7952	0.188904	0.0541105	0.731973	0.343085	0.182877
D105	2.60718	-0.109928	1.326	0.00605955	0.255912	-0.0989126	-0.68484	-0.634741	-0.0841438	0.232156	0.74395	0.388723	0.329685
F001	1.77958	-0.151084	1.68809	0.00760842	-0.0925188	-0.120076	-0.361507	-0.921272	0.30751	0.0531885	0.924478	0.401007	0.22184
F002	1.88539	-0.0542817	0.705688	-0.136241	-0.0175373	-0.0578756	-0.938189	-0.581337	0.00368378	0.0691048	0.864017	0.323171	0.218681
F003	2.33975	-0.0213782	0.125522	-0.321031	0.0806045	-0.0205017	-2.22196	-0.207406	-0.0287696	-0.0172826	0.989316	0.271089	-0.0684362
F004	2.21972	-0.0592402	1.19286	-0.124589	-0.0828191	-0.0571506	-1.06894	-0.582925	0.228724	0.141876	0.867916	0.520259	0.0916299
F005	2.9916	-0.140471	1.32856	-0.0954995	0.251175	-0.0503051	-1.1057	0.093339	0.129426	0.156076	0.920433	0.659844	0.0357477
F006	3.26112	-0.0313092	1.19874	0.0200371	0.0806197	-0.0202719	-1.05538	-0.301506	0.166	0.191931	1.1438	0.406069	0.0960073
F007	2.08807	-0.0698282	1.37301	0.218133	0.24229	-0.0802641	-0.285971	-0.823082	0.048889	0.130441	0.96159	0.420358	0.154706
F008	2.64259	-0.0488472	0.988714	0.200568	0.22224	-0.0410525	-0.387092	-0.266409	0.191809	0.164781	0.715338	0.440527	0.219646
F009	2.76986	-0.0445153	1.4867	-0.0960085	0.157506	-0.0669271	-0.957181	-0.809017	-0.00370636	0.14341	0.991666	0.45172	0.122715
F010	2.11378	-0.181328	1.79877	0.157418	0.110533	-0.135988	-0.903335	-1.01507	0.0259384	0.0697783	0.861148	0.322842	0.239577
F011	2.87746	-0.0754428	0.868845	0.00722357	0.0382664	-0.0834248	-1.7415	-0.601208	-0.0118243	0.0873979	1.09763	0.420339	0.1274
F012	1.99026	-0.109872	1.20304	-0.168299	0.113541	-0.085321	-0.840019	-0.815611	-0.00606312	0.0882329	0.836828	0.458796	0.186865
F013	2.18373	-0.140003	1.25402	0.0206181	0.350926	-0.0598711	-0.331886	-0.139845	0.108715	0.198132	0.639238	0.497483	0.175148
F014	1.59889	-0.146518	1.39964	-0.0484028	0.317658	-0.0970558	-0.0184631	-1.16416	0.130821	-0.00683759	0.842108	0.361311	0.0739168
F015	2.08548	0.0139943	1.18415	0.143775	0.262366	0.00705479	-1.10327	-0.0751591	0.109503	0.17379	0.788639	0.228735	0.272
F016	2.17423	-0.190582	1.47403	0.152492	0.264696	-0.0832703	-0.11062	-0.833812	0.150673	0.067324	0.55483	0.411721	0.0484665
F017	3.33908	-0.0709617	1.037	-0.109359	-0.0373312	-0.060187	-1.65247	-0.423387	0.268915	0.183289	1.00305	0.421339	0.202394
F018	2.6876	-0.0818135	0.873233	0.0285979	0.339591	-0.0988562	-0.852426	-1.16593	-0.0718217	0.0598131	0.560236	0.402437	0.266345
F019	2.20632	0.0695388	1.52663	0.070074	0.277678	-0.0475131	-0.127139	-0.64605	0.381328	0.163996	0.754215	0.320935	0.281595
F020	2.39344	-0.0631831	0.988697	-0.254606	0.123876	-0.0628311	-0.165281	-0.322459	0.133239	0.143462	0.891017	0.404925	0.083243
F021	2.84329	-0.0566913	1.99182	0.113042	0.294976	-0.0582684	-0.192182	-0.44994	0.421333	0.129112	0.931429	0.379428	0.099967
F022	2.4989	-0.11407	1.39261	0.0979816	0.157335	-0.0862785	0.629508	-0.632625	0.17282	0.0532862	0.63528	0.571704	0.227845
F023	2.77167	-0.09818	0.781996	0.162759	0.400461	-0.0615055	-1.50511	-0.631981	-0.204067	0.130795	0.718202	0.279812	0.161499
F024	2.67882	-0.00217139	1.19047	0.106768	0.494979	-0.0502097	-1.06068	-0.419727	0.223473	0.160957	0.506228	0.448204	0.125082
F025	1.69383	-0.111984	1.59853	-0.0683595	-0.131545	-0.126529	-0.565242	-0.676263	0.209935	0.0424025	0.686972	0.277828	0.103132
F026	2.50622	-0.105238	1.39756	-0.0578138	0.126682	-0.0568821	-0.358229	-0.287581	0.23263	0.163972	0.816822	0.478983	0.208212
F027	2.56498	0.021331	1.49233	0.189338	0.222573	-0.0481411	-0.811097	-0.779341	0.167195	0.0454749	0.863381	0.479354	0.19013
F028	2.71927	-0.17249	1.15422	-0.190395	0.257215	-0.0940363	-2.11602	-0.761529	0.169834	0.12811	0.791896	0.380164	0.169418
F029	2.83522	-0.0457492	1.5383	0.336273	0.158704	-0.0439756	-1.22389	-0.556284	0.25592	0.198447	0.796028	0.501773	0.122354
F030	2.27045	-0.0851963	1.19551	-0.0909887	-0.0157017	-0.130826	-0.770005	-0.875588	0.180236	0.0782872	0.839561	0.405717	0.237326
F031	2.87979	-0.143099	1.17526	0.202875	0.122155	-0.0962391	-1.39919	-0.766257	0.124323	0.014998	0.608812	0.370532	0.00710042
F032	1.6211	-0.0911193	1.4445	0.0120379	0.316753	-0.0464575	-0.478444	-0.276485	0.158846	0.194847	0.637975	0.435698	0.112023
F033	2.64371	-0.106432	0.786063	0.0973003	0.148971	-0.0700898	-1.77941	-0.563485	0.0515746	0.141219	0.901559	0.407768	0.0467691
F034	2.53223	-0.174714	1.171	-0.00122178	0.331835	-0.0812822	-0.963765	-0.812311	-0.0144763	0.0861159	0.933335	0.426004	0.0907021
F035	2.31154	-0.0936498	0.648004	0.00633107	0.365516	-0.0589052	-2.04913	-0.451892	0.177756	0.119015	0.883436	0.418186	0.0714566
F036	3.04014	-0.00621825	1.01948	0.178863	0.24849	-0.0347707	-1.58392	-0.549277	0.274504	0.223207	0.914626	0.494454	0.227613
F037	1.86156	0.00010014	1.3608	-0.0364544	0.146266	-0.0135849	0.242905	-0.113563	0.201653	0.0967915	0.69993	0.436853	-0.0684229
F038	1.73005	-0.0900584	1.60648	-0.218652	-0.0972459	-0.0759576	-1.316	-0.620038	-0.00221715	0.0537008	0.77896	0.355258	0.0531875
F039	2.82215	-0.100391	1.67859	0.107206	0.406326	-0.0671097	-1.66853	-0.426126	0.122508	0.0470373	0.640968	0.47715	0.128271
F040	1.49404	-0.0878145	1.10562	-0.0363211	0.323967	-0.0359766	-1.02286	-0.300005	0.182471	0.15762	0.747777	0.371771	0.0370007
F041	1.40699	-0.146791	1.48064	-0.0217808	0.186856	-0.107215	-0.514788	-0.686675	-0.0195447	0.151675	0.728439	0.475471	0.34398
F042	2.18978	-0.128695	1.4119	-0.261538	0.116116	-0.091759	-1.53315	-1.3248	-0.202074	0.191684	1.1402	0.440889	0.155609
F043	2.58011	-0.0744066	0.998085	0.0805124	0.29339	-0.0613826	-1.28127	-1.02191	-0.0540522	0.0709281	0.976411	0.363125	0.0934611
F044	1.98386	-0.0924978	1.51009	0.166085	0.309151	-0.0713104	-0.991757	-0.637282	0.0631441	0.0439779	0.9211	0.457349	0.0155538
F045	2.55078	-0.0979704	1.15901	0.318775	0.146251	-0.0739094	-0.415756	-0.336848	0.23061	0.129509	0.989303	0.561339	0.138956
F046	2.38576	0.0210098	1.69042	0.182791	0.373563	-0.0451097	-0.75936	-0.902563	0.505039	0.0730597	0.930547	0.570836	0.178038
F047	2.53523	0.139373	1.5249	0.0113127	0.071035	0.00871487	-1.04256	-0.577734	0.118025	0.209285	0.826137	0.410107	0.284669
F048	3.1068	-0.0953436	1.04325	0.0682244	-0.00109283	-0.0759174	-0.703283	-0.220355	0.202163	0.0938884	1.00059	0.379856	0.119411
F049	1.87174	-0.0453734	1.50301	-0.0851873	-0.0192748	-0.0435425	-1.17683	-0.458189	-0.195074	0.158587	0.877749	0.499937	-0.0820422
F050	2.13611	-0.183369	1.39533	0.162822	0.448633	-0.0955089	-0.536133	-0.357531	0.355303	0.165683	0.858891	0.592609	0.326333
F051	2.75665	-0.0138634	1.14004	0.00958925	0.139572	-0.0576283	-0.256135	-0.633601	0.207097	0.136543	0.945668	0.456711	0.146077
F052	2.11388	-0.0306923	1.42799	-0.070336	0.145106	-0.0737007	-0.884474	-0.830329	0.100049	0.0657487	0.616449	0.514812	0.154897
F053	2.57157	-0.215047	1.32712	-0.122172	0.08194	-0.129808	-0.987502	-0.508516	0.0488229	0.0911857	0.892309	0.466088	0.207752
F054	2.68612	0.0139511	1.54829	-0.138558	0.210469	-0.00677736	-0.57778	-0.684025	-0.119816	0.112008	0.730327	0.546178	0.0842938
F055	2.9239	-0.112255	1.1966	0.112049	0.326542	-0.0873012	0.323994	-0.679923	0.218699	0.0762604	1.00512	0.551046	0.107155
F056	2.08234	-0.123397	1.1825	0.0291933	0.161785	-0.10396	-1.43995	-1.1944	-0.175387	0.0216941	0.786383	0.356199	0.21016
F057	2.68527	-0.0159797	0.912722	0.0522967	0.41785	-0.0453611	-1.26524	-0.718898	0.08673	0.0779863	0.828937	0.38863	0.136078
F058	2.15696	-0.153326	1.38637	-0.191063	-0.291431	-0.124609	-2.52188	-1.1259	0.0214708	0.15672	0.935075	0.436978	0.211117
F059	2.44855	-0.102588	1.54496	0.0146463	0.168479	-0.0963462	-1.14141	-0.621695	0.0713685	0.122904	0.894107	0.589315	0.172974
F060	2.54797	0.00718258	1.19671	-0.0884606	0.294492	-0.0314476	-0.433208	-0.320262	-0.112236	0.152193	0.765767	0.474002	0.229322
F061	2.88115	-0.066119	1.29131	-0.127613	-0.451564	-0.0509368	-1.24217	-0.177582	0.089089	0.192842	1.20823	0.330339	0.0726735
F062	2.64282	-0.0690642	1.7438	0.0856711	0.554123	-0.0463439	-0.781495	-0.186622	0.198421	0.110177	0.841798	0.381646	0.123984
F063	2.57039	-0.0174422	1.33417	0.0729392	0.33628	-0.0431526	-0.586296	-0.372014	0.366295	0.171842	0.979663	0.557398	0.27571
F064	1.37913	-0.0134247	1.27983	-0.037681	-0.0489909	-0.0388793	-1.11776	-0.657019	-0.092321	-0.00936469	0.951513	0.555602	0.0457444
F065	1.69516	0.0100155	1.01212	-0.132984	0.196711	-0.0487948	-2.232	-0.685705	0.270975	0.254672	1.02484	0.600719	0.347097
F066	3.70706	-0.119462	0.81813	-0.233329	-0.0821928	-0.073193	-1.60398	-0.0614785	-0.113203	0.147565	1.17134	0.397672	0.060699
F067	2.58006	0.0593494	0.755949	0.0553143	0.292812	-0.0158754	-2.31507	-0.559075	0.149255	0.0889765	0.75265	0.236527	0.148608
F068	2.24261	-0.12296	1.6815	0.418294	0.682433	-0.0505613	-0.73095	-0.259568	0.218923	0.230531	0.502166	0.501094	0.195562
F069	2.33199	-0.043874	1.39614	-0.175146	0.216564	-0.0715483	-0.53578	-0.904855	-0.265106	0.104513	0.872342	0.470103	0.166318
F070	2.74523	-0.027909	0.986091	-0.104174	0.454327	-0.0525478	-0.416719	-0.516258	0.118005	0.16197	0.678201	0.419049	0.208421
F071	2.31482	-0.128488	1.5826	0.174127	0.598235	-0.0910136	-1.37722	-0.765923	0.105431	0.0241113	0.628791	0.408938	0.128799
F072	1.98354	-0.125782	1.51275	0.0239675	0.36764	-0.0992734	0.931987	-0.730041	0.164665	0.1925	0.799102	0.473476	0.331266
F073	2.74729	-0.116916	1.32095	0.00696868	0.0788371	-0.07989	-0.78044	-0.499856	0.273724	0.154228	0.678952	0.464423	0.145838
F074	2.52565	-0.0776921	1.08828	-0.198487	0.279195	-0.0238987	-0.38089	-0.245068	0.0296061	0.0902254	0.927828	0.377145	-0.0227492
F075	2.40899	0.00975765	1.10081	0.0567875	0.620459	-0.011854	-2.0586	-0.316888	0.20381	0.181223	0.668575	0.517766	0.244664
F076	1.73488	-0.170289	1.05024	-0.365233	0.0721732	-0.119934	-0.9469	-0.759554	-0.13635	0.0567374	0.893666	0.407737	-0.0797392
F077	1.29522	-0.106276	1.30519	-0.117463	0.0713082	-0.0272322	-0.552302	-0.0202718	-0.0938467	0.153747	0.820998	0.501067	-0.146116
F078	1.17409	0.0337764	1.59491	0.141143	0.194714	-0.0215645	-0.679939	-0.248339	-0.149041	0.136066	0.519832	0.482551	-0.0632972
F079	1.8283	-0.0274456	0.756079	0.247653	0.509019	-0.0542762	-1.15933	-0.646313	0.257353	0.14997	0.735566	0.366362	0.309284
F080	3.13231	-0.14969	1.36679	-0.0322028	0.282274	-0.0799772	-1.4466	-0.278758	-0.0314317	0.167624	1.25416	0.455017	-0.0032461
F081	2.62808	-0.0874009	1.68525	0.0750397	0.398919	-0.0913845	-1.38182	-0.62137	0.0258881	0.0739108	1.01314	0.467929	0.104789
F082	3.5482	-0.0677673	0.809599	-0.0657636	0.404507	-0.046268	-1.48992	-0.876714	-0.0832168	0.0742984	0.793554	0.443451	0.0569656
F083	1.55899	-0.0972318	1.58936	-0.0944508	-0.0129421	-0.0540001	-0.767099	-0.286267	0.112912	0.156118	0.622639	0.413405	0.0245358
F084	2.38491	-0.0423053	1.18019	0.0661042	0.226499	-0.0445247	-0.527733	-0.893085	0.240565	0.159005	0.906536	0.505695	0.306442
F085	2.35488	-0.103111	1.0852	0.067442	0.129775	-0.0813105	-0.60559	-0.643286	0.0416614	0.0685776	0.912315	0.49474	0.130251
F086	2.3494	-0.056363	2.05498	0.0400946	0.111019	-0.0687397	-0.586885	-0.534951	0.140724	0.219106	0.585131	0.465299	0.153287
F087	2.55652	-0.00965828	1.31288	-0.0354782	0.248861	-0.0387392	-0.862912	-0.394355	0.256231	0.131502	0.867948	0.523426	0.164069
F088	2.52359	-0.111413	0.965118	-0.0288382	0.227938	-0.0719161	-0.396161	-0.778497	-0.0201987	0.100922	0.768897	0.378449	0.0719669
F089	1.84927	0.00105709	0.843594	0.0220771	-0.113137	-0.0360083	-1.68208	-0.576991	0.469922	0.0606651	0.578319	0.518383	0.156657
F090	3.10058	-0.030647	1.45718	0.0147858	0.334847	-0.0487578	-1.09999	-0.611543	0.0837	0.117512	0.762193	0.535165	0.072922
F091	1.65217	-0.218311	1.25606	0.0584294	0.238799	-0.115635	-0.784626	-0.566934	0.0750989	0.0377974	0.69149	0.459965	0.19137
F092	2.06754	0.0124735	1.63844	0.0219489	0.215454	-0.0278588	-1.19087	-0.684833	0.313993	0.05599	0.592694	0.445965	0.0487538
F093	3.05476	-0.102567	0.576621	0.067742	0.119401	-0.0953167	-1.1215	-0.800703	0.0372939	0.171327	0.661421	0.35641	0.230355
F094	1.4878	-0.0442613	1.23114	0.0169304	0.293209	-0.0694549	-1.24361	-0.7482	-0.21292	0.0229118	0.755373	0.542624	0.106559
F095	2.8714	-0.0198949	1.10783	0.212506	0.172468	-0.0479975	-1.38424	-0.482972	0.224934	0.10543	0.823155	0.45326	0.213124
F096	2.30287	-0.164754	2.22039	-0.121636	-0.069711	-0.0818174	-1.06696	-0.573659	0.219899	0.0362319	0.753342	0.574732	-0.0871446
F097	2.84822	-0.141317	1.8065	-0.0867061	-0.3075	-0.0895276	-1.15453	-0.746457	-0.0581752	0.102937	1.12867	0.315298	0.018883
F098	3.01693	-0.105202	1.51609	-0.262475	0.044938	-0.0818335	-0.937861	-0.861333	-0.0221629	0.101287	0.978571	0.488284	0.168403
F099	1.67047	-0.225416	1.61447	0.14374	0.187458	-0.109372	0.474974	-0.528374	0.0122358	0.0360314	0.582	0.432758	0.0503327
F100	2.07966	-0.00445415	0.988045	-0.3265	0.00157069	-0.0415184	-1.86015	-0.6941	0.00822191	0.0484539	0.776254	0.34629	0.0627138
F101	2.22293	-0.122176	1.91678	-0.0203056	0.237903	-0.0697527	-0.05891	-0.765689	0.275304	0.0583164	0.527145	0.474404	0.121773
F102	1.57204	-0.0932259	0.913382	0.055044	0.19727	-0.0759972	-1.69357	-0.880551	0.251921	0.10335	0.339206	0.451958	0.119452
F103	2.64346	-0.0380031	0.957094	0.0983264	0.264479	-0.0537864	-1.44081	-0.529743	0.162192	0.12298	0.874934	0.514655	0.0437927
F104	3.02383	0.0203492	1.2703	0.0751053	0.254538	-0.0304192	-0.782583	-0.592312	-0.017123	0.136479	0.993754	0.510919	0.220684
F105	2.72731	-0.0706765	1.08615	0.0770974	0.166656	-0.106899	-1.17262	-1.46637	0.0707169	0.0120723	0.955879	0.312749	0.247629
L001	2.54288	-0.151532	1.04656	0.0946209	0.369923	-0.0746296	-1.0849	-0.0335166	-0.0126695	0.127455	0.446008	0.529726	0.0366662
L002	2.36991	-0.123581	1.78263	0.105907	0.214437	-0.0646279	-1.03353	-0.49337	0.317137	0.0528868	0.809992	0.476686	0.0430153
L003	2.10225	-0.10193	1.75052	0.140041	0.485433	-0.0446043	-1.23057	-0.141859	0.295843	0.0540384	0.687786	0.457781	0.0365648
L004	2.5636	-0.125826	1.13344	0.0566674	0.259422	-0.0788896	-1.63949	-0.638133	0.296247	0.136938	0.922158	0.242445	-0.0382191
L005	1.99773	-0.0765215	1.11463	-0.0610645	-0.126802	-0.124599	-1.13563	-0.722526	0.266898	-0.0341721	0.72448	0.312376	0.0832463
L006	2.31713	-0.0685315	1.00086	-0.0574075	0.0909053	-0.0657926	-1.26615	-0.78936	0.149564	0.0591405	0.785938	0.437415	0.0631996
L007	2.09409	-0.21697	0.764036	-0.0573157	0.283576	-0.119005	-0.672137	-0.581773	0.00326847	0.0979366	0.876957	0.430334	0.454024
L008	2.34524	-0.0451175	0.540134	0.050011	0.217164	-0.0641668	-1.92087	-0.833653	0.348682	0.120686	1.23069	0.389224	0.163549
L009	2.31978	-0.0388173	0.655369	0.184224	0.0275512	-0.0542426	-1.09317	-0.766594	0.0839453	0.145918	0.887704	0.353641	0.144133
L010	1.8267	-0.0722598	0.783737	0.109296	0.323421	-0.0632753	-0.548956	-0.589523	0.102547	0.0844301	0.654126	0.412079	0.291619
L011	2.94699	-0.108838	1.37712	0.121798	0.216403	-0.0836762	-0.696251	-0.430807	0.30654	0.111076	0.922442	0.511961	0.0635623
L012	2.37949	-0.138977	1.10195	-0.141034	-0.0562696	-0.0902816	-1.5152	-0.452413	0.0221294	0.109905	0.804841	0.239565	0.091262
L013	3.00434	-0.0541508	0.685874	-0.0715531	0.212166	-0.054131	-1.72513	-0.644163	0.317745	0.152732	1.28866	0.396297	0.167487
L014	1.6053	-0.0823801	0.960963	0.0331128	-0.102135	-0.103262	0.187543	-0.295925	0.424357	0.161868	0.561215	0.49413	0.0491041
L015	2.67304	-0.0688177	1.31235	0.116029	0.630246	-0.0625586	-0.301326	-0.482148	-0.0183204	0.101928	0.809054	0.382769	0.106041
L016	3.1681	-0.0619713	1.11692	-0.409125	0.175816	-0.0607304	-2.36447	-0.900175	-0.419625	0.136589	0.898033	0.360306	0.0103456
L017	2.16762	-0.104249	1.08725	0.191482	0.682566	-0.127419	-0.588525	-0.788729	0.31324	0.0879524	0.871	0.464113	0.260788
L018	1.96817	-0.0227055	1.6035	0.172563	0.247421	-0.0399055	-1.27651	-0.375093	0.339143	0.201973	0.79354	0.533149	0.286691
L019	3.08339	-0.093574	0.911361	0.0177554	0.21903	-0.0329688	-1.21212	-0.324294	0.192258	0.156403	0.811935	0.384031	0.0201665
L020	2.20277	0.00316749	0.539742	0.0955264	-0.0101828	-0.0556059	-1.24082	-0.904556	-0.210115	0.0440104	0.948711	0.328947	0.23539
L021	1.59188	0.0698311	1.07249	0.0381129	0.239193	-0.0319666	-0.853853	-1.0141	0.410756	0.0344541	0.483086	0.169908	0.189903
L022	1.19375	0.000754699	1.65218	-0.209229	0.360351	-0.0749528	-0.681705	-0.885599	0.154754	0.0691661	0.777405	0.290866	0.172769
L023	2.10112	-0.00585867	0.988337	0.00971329	-0.118432	-0.0310771	-0.805062	-0.654636	-0.313386	0.104398	0.589465	0.379633	0.191309
L024	2.06565	-0.0668023	1.3206	0.18489	0.224181	-0.0522547	-1.65147	-0.478303	0.345632	0.0804253	0.74038	0.512877	0.0300048
L025	2.47706	-0.0615571	1.14365	-0.0215212	0.31783	-0.0639251	-1.27936	-0.824186	-0.0251998	0.106306	0.717604	0.470508	0.0467752
L026	1.79934	-0.00351219	1.163	0.23642	0.343149	-0.0379623	-0.751585	-0.709529	0.0498212	0.141746	0.495418	0.376657	0.143722
L027	1.6394	-0.143686	1.57693	0.0366148	-0.0640986	-0.0342457	-0.512585	-0.204939	0.132491	0.0835644	0.672031	0.407164	0.0958608
L028	2.53656	-0.0792076	0.450303	0.139489	0.242746	-0.0385437	-0.612054	-0.464177	0.391385	0.0890386	0.716887	0.300216	0.133855
L029	2.20956	-0.0371218	1.10367	-0.193758	0.00606638	-0.0356854	-0.22497	-0.67281	0.260644	0.0803021	0.734539	0.459897	0.0124764
L030	2.12444	-0.175043	1.40761	0.175492	0.262712	-0.0912239	-1.04102	-0.492836	0.211394	0.0216076	0.77712	0.456893	0.0853517
L031	1.82427	-0.14952	1.59258	-0.224029	-0.0459118	-0.0934389	-0.0749881	-0.716616	0.00447185	-0.0161424	0.811256	0.336543	0.123744
L032	1.45649	-0.0392582	1.81254	0.104793	0.0974983	-0.0882245	-0.190979	-1.10943	-0.043572	-0.0492155	0.522024	0.396404	0.122845
L033	1.92371	-0.198529	2.33714	-0.145525	0.0990043	-0.11627	0.604183	-0.751589	0.292904	0.034254	0.863202	0.4814	0.145298
L034	2.37974	-0.0833823	1.14486	0.0657915	0.00236114	-0.0794948	-0.917376	-0.743149	0.162143	0.0442712	0.862223	0.479576	0.0639928
L035	2.50112	-0.124198	1.39826	-0.0382177	0.0477255	-0.0896185	-0.807136	-0.630752	0.121103	0.150435	0.991903	0.498916	0.215072
L036	2.33759	-0.0514584	2.10742	0.00612875	0.246699	-0.0415121	-0.499003	-0.937287	0.170065	0.07455	0.571384	0.674613	0.139793
L037	2.4712	0.00745063	1.97347	0.123083	0.434175	-0.0191483	-1.32996	-0.579218	0.250336	0.171536	0.936523	0.45986	0.00216014
L038	2.42879	-0.0109191	1.01332	-0.180645	0.547908	-0.0451583	-2.371	-0.80332	0.0220411	0.0331895	0.760966	0.353499	-0.0916628
L039	1.63039	0.0562045	0.688278	0.0225049	0.309692	-0.0346834	-2.91178	-1.05378	0.07294	-0.0352471	0.87269	0.211969	0.0629571
L040	2.73085	-0.140041	1.90073	0.027667	0.000420692	-0.092091	0.42306	-0.646527	0.132605	0.167806	0.606695	0.429629	0.171063
L041	1.67957	-0.222529	1.3158	-0.139046	0.164628	-0.0967193	-0.305321	-0.221722	0.096132	0.114144	0.756302	0.373398	0.0812472
L042	1.68534	-0.140628	1.90458	0.0922808	0.0619824	-0.0165334	0.375626	-0.235686	0.213713	0.123216	0.733695	0.493605	0.134661
L043	2.32253	-0.0138814	1.47678	0.08206	0.341789	-0.0386836	-0.805091	-0.804139	0.196737	0.0220881	0.708747	0.35605	0.0362182
L044	2.20289	-0.125858	1.29929	0.322524	0.588177	-0.103598	-0.693612	-0.751031	0.0242886	0.0655659	0.614051	0.417909	0.0494772
L045	2.43205	-0.00213754	1.2972	-0.0818338	0.0349037	-0.0315362	-0.236027	-0.118739	0.161699	0.131754	0.798568	0.424529	0.0607253
L046	3.03879	0.014999	1.12852	0.0111973	-0.0477907	-0.0363125	-1.48861	-0.868777	0.0786671	0.126125	0.934876	0.456661	0.0284305
L047	3.24028	-0.0018074	1.07173	0.189957	0.417953	-0.007214	-0.872715	-0.0473375	0.287017	0.206842	0.536619	0.278577	0.0545089
L048	2.16196	-0.0222363	1.07593	0.100043	0.400999	-0.00883356	-1.67001	-0.113193	0.21485	0.182783	0.877391	0.426089	0.0223299
L049	1.4251	-0.00935568	-0.153457	0.0605688	-0.0786976	-0.0434458	-2.33074	-0.645905	0.168084	0.126117	0.874634	0.397815	0.235769
L050	2.39122	-0.0507924	0.794361	0.00970324	0.327701	-0.052433	-0.987048	-0.695019	0.359371	0.12829	0.853422	0.40461	0.0963538
L051	2.40142	0.0703268	0.600493	0.0564376	0.377673	0.0025493	-1.379	-0.438508	0.289335	0.125066	0.727314	0.446353	0.258295
L052	2.4893	0.0308805	1.10532	-0.104773	0.21725	-0.00345786	-1.42811	-0.322141	0.192756	0.302775	0.968607	0.531091	0.162915
L053	1.71843	0.0638108	0.506391	-0.193385	0.349833	-0.0229082	-1.51715	-0.758952	0.170964	0.129484	0.776477	0.523515	0.130345
L054	1.26303	-0.154745	1.89665	0.0389637	0.0572208	-0.124867	-0.391444	-0.617616	0.23374	0.083732	0.529327	0.566835	0.116211
L055	2.12829	-0.138278	0.778325	0.0571377	0.275664	-0.0781498	-1.34135	-0.604052	0.0506276	0.167157	0.686962	0.410804	0.00754997
L056	2.53121	-0.111374	1.45083	0.0796289	0.221763	-0.0708481	-1.97973	-0.537412	0.320987	0.136115	0.573502	0.499398	0.146468
L057	2.34548	-0.0892011	1.05905	0.140145	0.0393825	-0.0724731	-0.671525	-0.470973	0.24639	0.0793982	0.512312	0.389008	0.147985
L058	2.26776	-0.0773971	1.18778	-0.0913258	0.142151	-0.0641062	-2.10842	-0.557701	0.151822	0.109104	0.907007	0.404759	0.0195167
L059	1.98544	-0.134753	1.63927	0.158989	-0.0670998	-0.0964227	-0.113562	-0.778803	-0.0263129	0.0504348	0.644403	0.446647	0.107623
L060	2.67604	-0.115766	1.03097	0.0730434	0.325628	-0.0858229	-1.51718	-0.670432	0.440638	0.114636	0.995128	0.463065	0.0789883
L061	2.37334	-0.177908	1.59915	0.167125	-0.0516754	-0.107789	-1.10582	-0.694817	0.329953	0.0926082	0.687127	0.373349	0.0686566
L062	1.31829	-0.0360152	1.10867	-0.153644	0.35836	-0.142326	-0.050955	-0.863582	-0.0022651	0.0186562	0.668722	0.419566	-0.0311072
L063	2.55855	-0.0572159	1.29827	-0.0725599	0.54053	-0.0665711	-1.17475	-0.726829	0.408552	0.190811	0.851724	0.427554	0.229897
L064	2.42762	0.0429771	1.52466	-0.247454	0.525345	-0.0472525	-1.27226	-0.149828	-0.10488	-0.0750201	0.542213	0.480342	0.0111619
L065	2.65777	-0.155839	0.573179	0.0703239	0.355716	-0.0889513	-2.03854	-0.411998	-0.0635268	0.193725	0.845097	0.421185	0.201125
L066	1.99449	-0.142464	1.65583	-0.0659048	0.175896	-0.0815575	-0.173378	-0.563176	-0.111551	0.0295465	0.835843	0.524551	-0.00386632
L067	1.82126	-0.145487	1.1179	-0.0092527	0.0800773	-0.110459	-0.908819	-0.407038	0.216052	0.0695767	0.70617	0.5052	0.100001
L068	2.50464	-0.0321567	1.45035	0.00450609	0.266255	-0.0379857	-0.385226	-0.597022	0.384358	0.132574	1.0922	0.46126	0.161706
L069	1.39222	0.0100027	1.40449	-0.0461523	0.22328	-0.00446922	-1.91069	-0.596016	0.36902	0.0567839	0.439679	0.415798	0.0815994
L070	2.1968	-0.0187111	1.12773	-0.0637781	-0.0488587	-0.046238	-1.64464	-0.810597	0.202058	0.158595	0.800901	0.322239	0.137566
L071	2.27669	-0.0985526	0.849709	0.0503735	0.284656	-0.0678975	-1.01868	-0.438326	-0.0715725	0.102345	0.590644	0.496097	-0.102721
L072	1.88468	-0.0836541	1.15198	0.240639	0.208608	-0.0765941	-1.5879	-0.936055	0.202011	0.083581	0.814101	0.25682	0.134693
L073	2.40973	-0.0232161	0.360308	0.222569	0.330335	-0.025759	-2.16113	-0.573367	0.414585	0.179901	0.840681	0.286173	0.170724
L074	1.38386	-0.121108	2.33488	-0.409166	-0.485226	-0.0689416	0.632101	-0.281692	0.0770787	0.078948	0.702557	0.466209	0.0534609
L075	1.90501	-0.0601342	1.126	0.116791	0.247503	-0.0326591	-1.07057	-0.260279	0.259631	0.196546	0.69117	0.477861	0.0977729
L076	2.37613	-0.00254475	0.458654	0.181676	0.0739746	-0.00549338	-1.37158	-0.366813	0.18871	0.0397084	0.859	0.292511	0.131745
L077	2.20644	-0.110272	1.32355	-0.209088	0.336693	-0.0637666	-1.38175	-0.829258	-0.140543	0.0393744	0.667837	0.465502	0.254686
L078	2.37788	-0.174977	1.16739	-0.155534	0.200766	-0.119795	-1.52167	-0.984413	0.0666304	0.0743385	1.09876	0.596769	0.201863
L079	2.82779	-0.0395721	1.23001	0.364597	0.168776	-0.0692138	0.157832	-1.13898	0.398939	0.199874	0.724406	0.345049	0.550911
L080	2.62344	-0.0532814	0.836787	0.192034	0.20992	-0.0694988	-2.05176	-0.686317	0.241919	0.125866	0.758712	0.359624	0.220788
L081	2.46514	-0.0933125	1.26882	0.0423878	0.507101	-0.0437598	-0.658837	-0.276568	0.215725	0.211903	0.697031	0.514622	0.207322
L082	2.82405	0.0356402	1.82488	-0.0195929	0.257381	-0.0403358	-0.50896	-0.77808	0.161068	0.0370733	0.554473	0.405106	0.155924
L083	2.85542	0.0219818	1.51847	0.080784	0.290658	-0.0302799	-0.862855	-0.469747	0.344182	0.157556	1.08171	0.527556	0.0577707
L084	3.21422	-0.152776	0.582125	0.0265998	0.147937	-0.116458	-1.51765	-1.06502	0.0885227	0.00501355	1.00364	0.420109	0.042477
L085	2.53377	-0.0250263	1.26129	0.0643894	0.235082	-0.0304742	-1.71977	0.0333547	0.197246	0.198476	0.696978	0.298798	0.101842
L086	2.4954	-0.123915	1.04645	0.0145497	0.351636	-0.0975736	-0.586937	-0.654289	0.128663	0.057014	0.852687	0.429454	0.154797
L087	2.97832	-0.111404	0.843569	0.061367	0.343909	-0.0891384	-1.46662	-0.640158	-0.0561869	0.195011	0.774672	0.470939	0.109298
L088	2.7052	-0.0845439	1.03093	-0.0899859	0.476091	-0.0627302	-0.683459	-0.308637	0.30509	0.159888	0.797711	0.509168	0.00819842
L089	2.12651	-0.168667	1.64155	-0.0428045	0.218531	-0.0997406	-0.644535	-0.652728	0.365502	0.177422	0.580541	0.493766	0.21426
L090	2.15493	-0.138695	1.94928	0.0855666	0.13596	-0.0736107	0.249642	-0.187335	0.0362683	0.176496	0.672331	0.326109	0.154662
L091	2.90251	-0.0447616	0.77764	-0.230492	0.104947	-0.0474541	-1.42295	-0.694477	0.14923	0.140172	1.14145	0.548764	0.081323
L092	2.34882	-0.102378	1.00396	0.13011	0.360065	-0.0730437	-0.773446	-0.664074	0.0188882	0.0538001	0.803545	0.392012	0.0672727
L093	1.9593	-0.109605	1.1979	0.0776067	0.129528	-0.0765674	-0.675382	-0.777496	-0.0540292	0.104352	0.662879	0.25317	0.219305
L094	1.64403	-0.0370082	1.63816	-0.0571935	0.197193	-0.0545096	-0.522357	-0.619253	0.270003	0.0944249	0.713568	0.233038	0.125544
L095	2.55846	-0.0537518	1.12724	-0.176643	-0.117527	-0.0375089	-1.26929	-0.335027	0.240447	0.123122	0.685323	0.291025	0.0248846
L096	2.57042	-0.0236059	1.32836	-0.242973	-0.150222	-0.0667429	-0.725832	-0.991496	-0.0011105	0.111207	0.989093	0.460325	0.0682892
L097	2.49485	-0.118605	0.825616	-0.306078	0.132467	-0.0764735	-2.34049	-1.03916	-0.319612	0.134146	0.813152	0.406152	0.0744441
L098	2.10755	-0.0666922	1.64889	-0.0166309	0.283698	-0.0620688	-0.479312	-0.437539	0.306752	0.167545	0.823105	0.350517	0.217037
L099	2.40728	-0.109623	1.09778	0.0482001	0.0136479	-0.0657037	-0.875777	-0.26928	0.295459	0.1882	0.697841	0.326499	0.115044
L100	1.65399	-0.133477	1.14695	0.0817503	0.300808	-0.0844474	-1.43287	-0.663885	0.447003	0.0927317	0.83275	0.237935	0.163706
L101	2.17044	-0.061074	1.44832	0.0067295	-0.0253557	-0.0880078	-1.3451	-1.00317	-0.0857176	-0.0222786	0.779868	0.394098	0.155982
L102	2.69781	-0.100785	0.874373	-0.0402169	0.291345	-0.0579077	-1.9161	-0.289163	0.295699	0.232222	0.735204	0.452445	0.0074031
L103	2.70735	-0.053831	1.35574	0.100799	0.036945	-0.102969	0.392328	-0.820765	0.162073	0.0662201	1.02635	0.363333	0.184926
L104	2.16592	-0.0227455	1.04683	-0.202513	0.0482421	-0.0153495	-1.7342	-0.272116	0.00885504	0.127463	0.924785	0.247516	0.236657
L105	1.82568	-0.0646457	1.39736	0.19978	0.234939	-0.0749989	-1.16961	-0.270654	0.324065	0.0779151	0.782299	0.385153	0.105961
L106	2.97447	0.0757145	1.08364	0.242254	0.240039	0.0640874	-1.12971	1.15755	0.204756	0.153074	1.26753	0.505851	0.000549331
L107	2.6636	-0.202526	0.705495	0.12456	0.032602	-0.0798266	-1.66573	-0.350443	-0.129415	0.144602	0.933972	0.420948	0.0695325
L108	2.61424	-0.0998727	0.987418	0.21105	0.236829	-0.0318844	-0.150503	-0.287453	0.189866	0.160447	0.91738	0.380024	0.162896
L109	2.05276	-0.140159	0.945062	-0.0449205	-0.0918576	-0.0876013	-1.23587	-0.469196	0.0889024	0.0457542	0.836478	0.445224	0.0712865
L110	1.51172	-0.207197	2.05966	-0.13419	0.131406	-0.103011	-0.423663	-0.69563	0.0329117	0.0428576	0.541565	0.699235	0.0478149
L111	2.49843	-0.0582105	1.98045	-0.0860072	0.623115	-0.0638914	0.500122	-0.701372	0.118181	0.0699181	0.530611	0.426112	0.0422791
L112	1.8798	0.0457428	1.12388	0.0489269	0.281082	-0.0306068	-0.766736	-0.907375	0.324515	0.06447	0.544472	0.496864	0.186966
L113	1.89723	0.0028849	1.50988	0.097087	0.336234	-0.0602486	-0.399985	-0.97059	0.0780863	0.0505357	0.457445	0.441937	0.123369
L114	1.9049	0.0133854	1.36352	0.245136	0.11595	-0.0528851	-1.04021	-1.08436	0.273789	0.0956596	0.991901	0.470884	0.116896
L115	1.87686	-0.0831352	1.21661	-0.0578379	0.138317	-0.0901534	-1.42916	-1.02415	-0.168582	0.0777314	0.627569	0.349733	0.126329
L116	2.41532	-0.130055	1.3595	-0.0543339	0.383405	-0.0903262	-1.95573	-0.835255	-0.047756	0.072116	0.759061	0.504344	0.160182
L117	2.1871	-0.0462677	1.01206	0.0664806	-0.16344	-0.0329509	-1.66484	-0.482213	0.03692	0.137084	0.645975	0.394242	0.176078
L118	2.35259	-0.0947357	0.886666	-0.036354	0.514996	-0.0478128	-1.30243	-0.15027	0.376702	0.153449	0.866902	0.526647	0.101324
L119	2.09558	-0.115399	1.31611	0.187435	0.39901	-0.0644727	-0.98849	-0.729465	0.306671	0.0893634	0.518018	0.418372	0.267534
L120	2.27828	-0.0832714	1.43512	-0.114855	0.232841	-0.0558691	-1.6778	-0.539385	-0.109981	0.066088	0.621341	0.268063	0.119183
L121	2.75142	-0.00530911	1.59662	0.348078	0.295253	-0.028289	-1.04127	0.132834	0.14683	0.157943	0.995204	0.355337	0.187837
L122	3.1159	-0.0631411	1.31326	0.190231	0.361925	-0.0531185	-1.72846	-0.55277	0.169484	0.155052	0.858788	0.486266	0.242164
L123	3.04561	-0.0565363	0.0900522	0.0151618	0.328786	-0.0609464	-1.28479	-0.494774	0.452409	0.24594	0.967105	0.416435	0.297794
L124	2.13644	-0.109813	1.70735	0.0227174	0.159569	-0.0460576	-0.997401	-0.546835	0.186351	0.124962	0.758369	0.301713	0.198643
L125	3.02302	-0.0925771	1.06484	0.0506192	0.209676	-0.0498332	-1.66668	-0.551943	0.159128	0.187013	0.845862	0.392006	0.136763
L126	2.14605	-0.0397392	1.78701	0.105162	0.0958015	-0.0349513	0.350909	-0.695788	0.186046	0.139842	0.587327	0.376811	0.136833
