# Supplementary material for: Deep learning-based phenotype prediction analysis of genotype-environment interactions and mining of environmentally stable germplasm and elite loci in cotton
Source: Research Square preprint supplement (doi:10.21203/rs.3.rs-7483914/v1), 2025-09-11
Supplement: Supplementary file 9 [file c8d2a43f71bdd48213488fe6.xlsx]

## Sheet: Sheet1
Supplementary Table 15. The shared SNP loci of GWAS and interpretability analysis of AttGEI-Net model
Trait categories	Traits	Chromosome	Maker	Position (bp)	Feature important	Normalized feature important	Parameters
Fiber quality-related traits	FL	A08	A08_109595578	109595578	0.00387736	0	Phenotype value
		D11	D11_22173199	22173199	0.0119092	1	Phenotype value
		D11	D11_22585185	22585185	0.00620491	0.289788	Phenotype value
		D11	D11_24443859	24443859	0.00668262	0.349265	Phenotype value
	FS	A07	A07_88546812	88546812	0.0106135	0.284465	Phenotype value
		A07	A07_88738177	88738177	0.00992457	0.264444	Phenotype value
		A07	A07_90192518	90192518	0.00571082	0.141982	Phenotype value
		A07	A07_90223220	90223220	0.0346605	0.983327	Phenotype value
		A11	A11_16925069	16925069	0.0294891	0.833036	Environmental adaptation parameter
		D03	D03_31682194	31682194	0.0257	0.722915	Environmental adaptation parameter
		D03	D03_31748827	31748827	0.0336325	0.953453	Environmental adaptation parameter
		D03	D03_31758208	31758208	0.00342855	0.075654	Environmental adaptation parameter
		D04	D04_9422614	9422614	0.00108552	0.00756017	Environmental adaptation parameter
		D09	D09_34814165	34814165	0.00713165	0.183275	Environmental adaptation parameter
		D09	D09_34863539	34863539	0.00561702	0.139256	Environmental adaptation parameter
		D09	D09_34951476	34951476	0.0102912	0.275099	Environmental adaptation parameter
		D09	D09_34972342	34972342	0.000825389	0	Environmental adaptation parameter
		D11	D11_24559877	24559877	0.0352341	1	Phenotype value
	M	D02	D02_5545765	5545765	0.000236726	0.727155	Environmental adaptation parameter
		D02	D02_5837675	5837675	0.000306002	1	Environmental adaptation parameter
		D11	D11_30491172	30491172	5.21412e-05	0	Phenotype value
	LU	D11	D11_24530180	24530180	0.0135212	1	Phenotype value
		D11	D11_24659631	24659631	0.00540455	0.276686	Phenotype value
		D13	D13_56983630	56983630	0.00229971	0	Phenotype value
Grow period-related traits	FD	D03	D03_13846946	13846946	0.0222434	0.123557	Environmental adaptation parameter and phenotype value
		D03	D03_16566865	16566865	0.0135575	0.0494089	Environmental adaptation parameter and phenotype value
		D03	D03_29994594	29994594	0.0252248	0.149008	Environmental adaptation parameter and phenotype value
		D03	D03_32146763	32146763	0.0656316	0.493946	Phenotype value
		D03	D03_32201142	32201142	0.124912	1	Environmental adaptation parameter and phenotype value
		D03	D03_32323321	32323321	0.00776967	0	Phenotype value
		D03	D03_32389885	32389885	0.114466	0.910827	Phenotype value
		D03	D03_32439964	32439964	0.112641	0.895248	Environmental adaptation parameter and phenotype value
	GP	A11	A11_117847584	117847584	0.0720153	0	Environmental adaptation parameter
	SBno	D12	D12_43144816	43144816	0.0220255	0	Phenotype value
	SBnode	D03	D03_32213586	32213586	0.0232913	0.594932	Environmental adaptation parameter
		D03	D03_32244084	32244084	0.0386667	1	Environmental adaptation parameter and phenotype value
		D03	D03_32246700	32246700	0.000709135	0	Environmental adaptation parameter
		D03	D03_32386534	32386534	0.0230652	0.588976	Environmental adaptation parameter
		D03	D03_32437725	32437725	0.0167095	0.421532	Environmental adaptation parameter
Fiber yield-related traits	BPP	D12	D12_57431376	57431376	0.0215004	0	Phenotype value
	FWPB	A02	A02_100845374	100845374	0.00119203	0	Environmental adaptation parameter
	LP	A02	A02_100906393	100906393	0.0595364	0.570638	Environmental adaptation parameter
		A08	A08_28358617	28358617	0.0140096	0.106711	Environmental adaptation parameter
		A08	A08_40275750	40275750	0.0551864	0.526311	Environmental adaptation parameter
		A08	A08_46871878	46871878	0.0595364	0.570638	Environmental adaptation parameter and phenotype value
		A08	A08_49729638	49729638	0.0105227	0.0711788	Environmental adaptation parameter
		A08	A08_52514222	52514222	0.0159453	0.126436	Environmental adaptation parameter and phenotype value
		A08	A08_59761723	59761723	0.101671	1	Environmental adaptation parameter and phenotype value
		A08	A08_62309682	62309682	0.0318138	0.288139	phenotype value
		A08	A08_69356367	69356367	0.0463732	0.436502	phenotype value
		D03	D03_41074361	41074361	0.0265702	0.234706	Environmental adaptation parameter
		D07	D07_3840922	3840922	0.0948214	0.930199	phenotype value
		D07	D07_3841910	3841910	0.00353768	0	phenotype value
	SI	A12	A12_103543383	103543383	0.00656704	0	Environmental adaptation parameter
