# Supplementary material for: Deep learning-based phenotype prediction analysis of genotype-environment interactions and mining of environmentally stable germplasm and elite loci in cotton
Source: Research Square preprint supplement (doi:10.21203/rs.3.rs-7483914/v1), 2025-09-11
Supplement: Supplementary file 10 [file df4d66b49d62cd9d055cd5a9.xlsx]

## Sheet: Sheet1
Supplementary Table 11. The shared SNPs associated with cross-trait categories using three parameters of 419 upland cotton for GWAS
Cross-trait categories	Chromosome	Maker	Position (bp)	allele1	allele0	P-value	Parameters
Fiber quality and fiber yield related traits	A02	A02_686825	686825	C	G	2.6687e-07	Environmental adaptation parameter
	A02	A02_97261412	97261412	C	T	4.54059e-07	Environmental adaptation parameter
	A02	A02_97262748	97262748	A	G	5.1941e-07	Environmental adaptation parameter
	A02	A02_97264605	97264605	G	A	3.81517e-07	Environmental adaptation parameter
	A02	A02_97264783	97264783	T	G	6.44427e-07	Environmental adaptation parameter
	A02	A02_97264958	97264958	C	T	3.43803e-07	Environmental adaptation parameter
	A02	A02_97264964	97264964	C	T	3.61661e-07	Environmental adaptation parameter
	A02	A02_97265014	97265014	A	G	6.02544e-07	Environmental adaptation parameter
	A02	A02_97265055	97265055	G	A	6.14889e-07	Environmental adaptation parameter
	A02	A02_97265584	97265584	C	T	7.23515e-07	Environmental adaptation parameter
	A02	A02_97267055	97267055	G	A	1.23309e-07	Environmental adaptation parameter
	A02	A02_97267072	97267072	A	G	1.51806e-07	Environmental adaptation parameter
	A02	A02_97267095	97267095	C	T	6.60723e-08	Environmental adaptation parameter
	A02	A02_97267140	97267140	A	C	3.14816e-07	Environmental adaptation parameter
	A02	A02_97267159	97267159	T	C	2.55128e-07	Environmental adaptation parameter
	A02	A02_97267185	97267185	G	T	1.62249e-07	Environmental adaptation parameter
	A02	A02_97269040	97269040	T	C	2.19463e-07	Environmental adaptation parameter
	A02	A02_97269628	97269628	G	T	2.27564e-07	Environmental adaptation parameter
	A02	A02_97269649	97269649	C	T	7.28891e-07	Environmental adaptation parameter
	A02	A02_97269654	97269654	G	T	7.28891e-07	Environmental adaptation parameter
	A02	A02_97269852	97269852	T	A	9.99306e-07	Environmental adaptation parameter
	A02	A02_97270385	97270385	A	G	4.4778e-07	Environmental adaptation parameter
	A02	A02_97277089	97277089	G	C	4.90732e-07	Environmental adaptation parameter
	A02	A02_97277098	97277098	T	C	4.56288e-07	Environmental adaptation parameter
	A02	A02_97277373	97277373	G	A	6.99322e-07	Environmental adaptation parameter
	A02	A02_97403001	97403001	C	T	8.8426e-07	Environmental adaptation parameter
	A02	A02_97406835	97406835	G	A	3.91179e-07	Environmental adaptation parameter
	A02	A02_97409206	97409206	G	A	7.04985e-07	Environmental adaptation parameter
	A02	A02_97409714	97409714	C	T	1.09425e-07	Environmental adaptation parameter
	A02	A02_97412788	97412788	A	G	8.17703e-07	Environmental adaptation parameter
	A02	A02_97416232	97416232	G	A	3.68681e-07	Environmental adaptation parameter
	A02	A02_97417867	97417867	C	A	9.61031e-07	Environmental adaptation parameter
	A02	A02_97417910	97417910	C	A	6.21681e-07	Environmental adaptation parameter
	A02	A02_97420026	97420026	C	T	4.88553e-07	Environmental adaptation parameter
	A02	A02_97437813	97437813	C	T	5.32667e-07	Environmental adaptation parameter
	A02	A02_97438896	97438896	A	G	7.46296e-07	Environmental adaptation parameter
	A02	A02_97438909	97438909	A	G	2.19002e-07	Environmental adaptation parameter
	A02	A02_97525401	97525401	A	G	4.1022e-07	Environmental adaptation parameter
	A02	A02_97532523	97532523	A	G	6.8293e-07	Environmental adaptation parameter
	A02	A02_98273500	98273500	A	C	6.63264e-07	Environmental adaptation parameter
	A02	A02_100825679	100825679	T	C	8.19032e-08	Environmental adaptation parameter
	A02	A02_100832983	100832983	T	G	9.18319e-08	Environmental adaptation parameter
	A02	A02_100834987	100834987	T	A	7.37866e-07	Environmental adaptation parameter
	A02	A02_100838551	100838551	C	A	1.935e-08	Environmental adaptation parameter
	A02	A02_100840657	100840657	C	T	5.58849e-08	Environmental adaptation parameter
	A02	A02_100841436	100841436	A	G	3.19949e-07	Environmental adaptation parameter
	A02	A02_100843660	100843660	G	A	7.4234e-08	Environmental adaptation parameter
	A02	A02_100845374	100845374	T	C	1.09678e-08	Environmental adaptation parameter
	A02	A02_100846248	100846248	T	A	9.79194e-08	Environmental adaptation parameter
	A02	A02_100858636	100858636	G	A	1.78751e-08	Environmental adaptation parameter
	A02	A02_100859508	100859508	C	T	3.56813e-09	Environmental adaptation parameter
	A02	A02_100859616	100859616	C	T	4.27061e-08	Environmental adaptation parameter
	A02	A02_100859929	100859929	G	A	4.49655e-08	Environmental adaptation parameter
	A02	A02_100859984	100859984	G	T	1.18115e-07	Environmental adaptation parameter
	A02	A02_100860251	100860251	T	C	3.54436e-08	Environmental adaptation parameter
	A02	A02_100860313	100860313	A	C	6.94176e-08	Environmental adaptation parameter
	A02	A02_100860382	100860382	A	C	3.69361e-09	Environmental adaptation parameter
	A02	A02_100861404	100861404	G	A	5.94333e-07	Environmental adaptation parameter
	A02	A02_100861430	100861430	A	T	1.51573e-08	Environmental adaptation parameter
	A02	A02_100862943	100862943	T	C	2.92582e-07	Environmental adaptation parameter
	A02	A02_100863539	100863539	G	A	5.2277e-08	Environmental adaptation parameter
	A02	A02_100864543	100864543	A	G	1.31541e-07	Environmental adaptation parameter
	A02	A02_100866569	100866569	G	A	6.03439e-08	Environmental adaptation parameter
	A02	A02_100866667	100866667	T	C	8.37907e-08	Environmental adaptation parameter
	A02	A02_100866880	100866880	T	A	8.65034e-08	Environmental adaptation parameter
	A02	A02_100867083	100867083	C	T	1.02947e-08	Environmental adaptation parameter
	A02	A02_100867311	100867311	G	C	1.19014e-07	Environmental adaptation parameter
	A02	A02_100867656	100867656	T	C	7.90443e-07	Environmental adaptation parameter
	A02	A02_100868486	100868486	A	T	1.20828e-07	Environmental adaptation parameter
	A02	A02_100870048	100870048	G	A	1.38998e-08	Environmental adaptation parameter
	A02	A02_100870159	100870159	A	G	1.46438e-09	Environmental adaptation parameter
	A02	A02_100870190	100870190	C	T	1.54904e-07	Environmental adaptation parameter
	A02	A02_100870394	100870394	C	A	5.25807e-08	Environmental adaptation parameter
	A02	A02_100870406	100870406	C	A	3.02305e-08	Environmental adaptation parameter
	A02	A02_100870588	100870588	C	T	4.39785e-07	Environmental adaptation parameter
	A02	A02_100870700	100870700	C	A	3.19705e-08	Environmental adaptation parameter
	A02	A02_100870775	100870775	T	C	4.76888e-08	Environmental adaptation parameter
	A02	A02_100870783	100870783	T	C	4.31333e-08	Environmental adaptation parameter
	A02	A02_100870998	100870998	G	T	3.83739e-07	Environmental adaptation parameter
	A02	A02_100871022	100871022	C	T	1.41381e-07	Environmental adaptation parameter
	A02	A02_100871270	100871270	G	A	1.39868e-07	Environmental adaptation parameter
	A02	A02_100871400	100871400	G	A	2.12818e-07	Environmental adaptation parameter
	A02	A02_100872824	100872824	G	T	3.4152e-08	Environmental adaptation parameter
	A02	A02_100873108	100873108	A	T	5.87629e-10	Environmental adaptation parameter
	A02	A02_100873162	100873162	C	A	1.16103e-07	Environmental adaptation parameter
	A02	A02_100873262	100873262	G	A	5.06834e-08	Environmental adaptation parameter
	A02	A02_100873293	100873293	G	A	4.26427e-08	Environmental adaptation parameter
	A02	A02_100873805	100873805	G	T	2.53293e-08	Environmental adaptation parameter
	A02	A02_100874052	100874052	C	T	1.86801e-07	Environmental adaptation parameter
	A02	A02_100874593	100874593	C	T	4.59512e-07	Environmental adaptation parameter
	A02	A02_100875561	100875561	G	A	1.83095e-07	Environmental adaptation parameter
	A02	A02_100875564	100875564	G	T	1.89216e-07	Environmental adaptation parameter
	A02	A02_100875582	100875582	G	A	1.53827e-07	Environmental adaptation parameter
	A02	A02_100875593	100875593	T	C	1.55705e-07	Environmental adaptation parameter
	A02	A02_100878992	100878992	A	C	1.20393e-07	Environmental adaptation parameter
	A02	A02_100879098	100879098	C	T	2.61137e-07	Environmental adaptation parameter
	A02	A02_100881321	100881321	A	G	1.57043e-07	Environmental adaptation parameter
	A02	A02_100881719	100881719	T	C	1.85092e-07	Environmental adaptation parameter
	A02	A02_100884061	100884061	T	C	2.59657e-08	Environmental adaptation parameter
	A02	A02_100884090	100884090	G	A	1.21104e-08	Environmental adaptation parameter
	A02	A02_100884371	100884371	G	T	6.31672e-08	Environmental adaptation parameter
	A02	A02_100884379	100884379	A	G	6.38055e-08	Environmental adaptation parameter
	A02	A02_100885871	100885871	G	A	1.52517e-07	Environmental adaptation parameter
	A02	A02_100885939	100885939	G	A	7.8552e-08	Environmental adaptation parameter
	A02	A02_100886073	100886073	C	A	1.34989e-07	Environmental adaptation parameter
	A02	A02_100886801	100886801	C	A	7.25938e-08	Environmental adaptation parameter
	A02	A02_100891633	100891633	G	A	3.01607e-08	Environmental adaptation parameter
	A02	A02_100892603	100892603	A	T	9.48164e-07	Environmental adaptation parameter
	A02	A02_100901874	100901874	T	A	1.08716e-07	Environmental adaptation parameter
	A02	A02_100903188	100903188	C	T	7.2682e-08	Environmental adaptation parameter
	A02	A02_100903327	100903327	G	A	2.6409e-08	Environmental adaptation parameter
	A02	A02_100903344	100903344	G	A	3.12354e-08	Environmental adaptation parameter
	A02	A02_100906393	100906393	C	T	4.30954e-08	Environmental adaptation parameter
	A02	A02_100915504	100915504	G	A	3.18281e-08	Environmental adaptation parameter
	A02	A02_100915627	100915627	G	T	1.99441e-09	Environmental adaptation parameter
	A02	A02_100917940	100917940	C	T	4.62559e-08	Environmental adaptation parameter
	A02	A02_100918618	100918618	G	A	2.17256e-07	Environmental adaptation parameter
	A02	A02_100918630	100918630	C	T	1.73659e-07	Environmental adaptation parameter
	A02	A02_100928547	100928547	A	G	4.02609e-09	Environmental adaptation parameter
	A03	A03_50730691	50730691	T	G	1.67463e-08	Environmental adaptation parameter
	A07	A07_1872426	1872426	C	G	4.24797e-09	Environmental adaptation parameter
	A07	A07_88736771	88736771	A	C	2.76145e-07	Phenotype value
	A07	A07_88739140	88739140	G	C	3.05592e-07	Phenotype value
	A07	A07_88739209	88739209	A	G	2.44742e-07	Environmental adaptation parameter, Phenotype value
	A07	A07_88740254	88740254	T	C	4.01114e-07	Phenotype value
	A07	A07_88740430	88740430	T	G	9.34201e-07	Phenotype value
	A07	A07_88740922	88740922	A	C	5.96042e-07	Phenotype value
	A07	A07_88740968	88740968	A	G	9.20625e-07	Phenotype value
	A07	A07_88741590	88741590	A	G	8.58726e-07	Phenotype value
	A07	A07_88741627	88741627	G	C	6.25265e-07	Phenotype value
	A07	A07_88741628	88741628	T	A	6.25265e-07	Phenotype value
	A07	A07_88743622	88743622	T	C	1.3156e-07	Phenotype value
	A07	A07_88760460	88760460	T	C	8.18949e-07	Phenotype value
	A07	A07_88820452	88820452	A	G	7.23722e-08	Environmental adaptation parameter
	A07	A07_90498854	90498854	A	G	5.99485e-07	Phenotype value
	A07	A07_90587279	90587279	T	C	1.72822e-09	Environmental adaptation parameter, Phenotype value
	A08	A08_38621228	38621228	A	T	1.47402e-08	Environmental adaptation parameter
	A08	A08_40617004	40617004	A	T	1.05809e-08	Environmental adaptation parameter
	A08	A08_55665113	55665113	A	G	1.21635e-07	Environmental adaptation parameter
	A08	A08_59283861	59283861	G	A	2.9933e-09	Environmental adaptation parameter
	A08	A08_67179079	67179079	G	T	8.17856e-07	Environmental adaptation parameter
	A09	A09_10459159	10459159	A	T	1.48087e-07	Environmental adaptation parameter
	A09	A09_10467329	10467329	T	G	9.28149e-07	Environmental adaptation parameter
	A10	A10_114559443	114559443	A	G	1.65369e-07	Environmental adaptation parameter
	A11	A11_1621668	1621668	T	G	5.67974e-08	Environmental adaptation parameter
	A11	A11_1638297	1638297	C	T	3.40589e-07	Environmental adaptation parameter
	A11	A11_1639628	1639628	A	T	5.27363e-07	Environmental adaptation parameter
	A11	A11_1646428	1646428	C	T	3.92016e-07	Environmental adaptation parameter
	A11	A11_1666091	1666091	A	T	8.57555e-07	Environmental adaptation parameter
	A11	A11_1674860	1674860	A	G	4.75509e-07	Environmental adaptation parameter
	A11	A11_1753631	1753631	G	A	3.3808e-07	Environmental adaptation parameter
	D01	D01_670672	670672	A	G	8.32842e-07	Environmental adaptation parameter
	D02	D02_5838329	5838329	A	C	7.944e-12	Environmental adaptation parameter
	D02	D02_5839655	5839655	A	G	6.67474e-12	Environmental adaptation parameter
	D02	D02_5840189	5840189	A	G	1.0694e-11	Environmental adaptation parameter
	D02	D02_5855371	5855371	A	G	5.60413e-13	Environmental adaptation parameter, Phenotype value
	D02	D02_5855415	5855415	C	A	1.49631e-12	Environmental adaptation parameter
	D02	D02_5880919	5880919	G	A	3.5078e-09	Environmental adaptation parameter
	D02	D02_5880979	5880979	C	G	1.24814e-08	Environmental adaptation parameter
	D02	D02_5881539	5881539	A	G	1.94054e-09	Environmental adaptation parameter
	D02	D02_5887671	5887671	T	C	7.46103e-08	Environmental adaptation parameter
	D02	D02_5888133	5888133	G	C	9.59779e-09	Environmental adaptation parameter
	D02	D02_5888325	5888325	C	T	9.06108e-10	Environmental adaptation parameter, Phenotype value
	D02	D02_5888347	5888347	C	T	1.79161e-10	Environmental adaptation parameter, Phenotype value
	D02	D02_5888929	5888929	G	T	5.93274e-09	Environmental adaptation parameter, Phenotype value
	D02	D02_5888961	5888961	A	C	2.87184e-10	Environmental adaptation parameter
	D02	D02_5889773	5889773	C	T	1.69072e-08	Environmental adaptation parameter
	D02	D02_61714541	61714541	G	C	1.53711e-07	Environmental adaptation parameter
	D02	D02_61715484	61715484	T	A	3.96649e-07	Environmental adaptation parameter
	D02	D02_61716873	61716873	G	C	2.72234e-07	Environmental adaptation parameter
	D02	D02_61719291	61719291	T	C	3.07003e-07	Environmental adaptation parameter
	D02	D02_61719481	61719481	A	G	3.54899e-07	Environmental adaptation parameter
	D02	D02_63083614	63083614	A	G	3.38613e-07	Environmental adaptation parameter
	D02	D02_63102839	63102839	C	T	1.55161e-07	Environmental adaptation parameter
	D02	D02_63109556	63109556	A	C	1.62387e-08	Environmental adaptation parameter
	D02	D02_63255773	63255773	A	G	1.88086e-08	Environmental adaptation parameter
	D04	D04_16287237	16287237	A	G	4.78531e-07	Environmental adaptation parameter
	D05	D05_15106977	15106977	T	C	2.60842e-08	Environmental adaptation parameter
	D05	D05_15108910	15108910	A	G	3.27193e-08	Environmental adaptation parameter
	D05	D05_15110285	15110285	A	G	1.88674e-08	Environmental adaptation parameter
	D05	D05_15247714	15247714	G	T	1.03668e-09	Environmental adaptation parameter
	D05	D05_15255786	15255786	G	T	4.78757e-09	Environmental adaptation parameter
	D05	D05_30008161	30008161	A	G	5.53401e-07	Environmental adaptation parameter
	D05	D05_30010941	30010941	A	C	9.96453e-07	Environmental adaptation parameter
	D05	D05_30020862	30020862	A	G	5.49862e-07	Environmental adaptation parameter
	D05	D05_30046651	30046651	A	G	5.07937e-07	Environmental adaptation parameter
	D05	D05_30059858	30059858	A	G	7.18644e-07	Environmental adaptation parameter
	D05	D05_30072155	30072155	T	C	4.82205e-07	Environmental adaptation parameter
	D05	D05_30073200	30073200	T	C	5.52034e-07	Environmental adaptation parameter
	D05	D05_30080703	30080703	C	T	4.12242e-07	Environmental adaptation parameter
	D05	D05_30080796	30080796	A	G	3.11895e-07	Environmental adaptation parameter
	D05	D05_30082006	30082006	T	C	4.97874e-07	Environmental adaptation parameter
	D05	D05_30099547	30099547	T	G	9.4512e-07	Environmental adaptation parameter
	D05	D05_30100325	30100325	T	G	1.90173e-07	Environmental adaptation parameter
	D05	D05_30108443	30108443	T	C	2.61071e-07	Environmental adaptation parameter
	D05	D05_30148667	30148667	T	C	6.31794e-07	Environmental adaptation parameter
	D05	D05_30151573	30151573	T	C	1.93066e-07	Environmental adaptation parameter
	D05	D05_30152802	30152802	A	G	1.28998e-07	Environmental adaptation parameter
	D08	D08_66285041	66285041	C	G	1.32122e-07	Environmental adaptation parameter
	D08	D08_66291357	66291357	C	G	2.36709e-07	Environmental adaptation parameter
	D09	D09_43150941	43150941	A	G	7.39029e-09	Environmental adaptation parameter
	D10	D10_46724825	46724825	A	G	1.13288e-08	Environmental adaptation parameter
	D10	D10_46747586	46747586	C	T	8.71771e-07	Environmental adaptation parameter
	D10	D10_46757387	46757387	G	T	7.85646e-07	Environmental adaptation parameter
	D10	D10_47571247	47571247	T	C	2.95464e-07	Environmental adaptation parameter
	D10	D10_47619756	47619756	G	A	9.03655e-07	Environmental adaptation parameter
	D11	D11_18099045	18099045	A	G	5.20718e-07	Environmental adaptation parameter
	D11	D11_24486403	24486403	C	T	6.9649e-07	Phenotype value
	D11	D11_28246438	28246438	C	T	2.76217e-07	Environmental adaptation parameter
	D11	D11_28758561	28758561	G	A	1.42688e-07	Environmental adaptation parameter
	D11	D11_28761588	28761588	G	A	2.30477e-07	Environmental adaptation parameter
	D11	D11_28761627	28761627	G	A	1.99898e-07	Environmental adaptation parameter
	D11	D11_28816107	28816107	T	C	2.25908e-07	Environmental adaptation parameter
	D11	D11_28816719	28816719	T	C	4.3284e-07	Environmental adaptation parameter
	D11	D11_28816739	28816739	T	C	3.22705e-07	Environmental adaptation parameter
	D11	D11_28832701	28832701	T	G	1.37408e-07	Environmental adaptation parameter
	D11	D11_28839754	28839754	T	C	2.08472e-07	Environmental adaptation parameter
	D11	D11_28839811	28839811	T	C	2.75921e-07	Environmental adaptation parameter
	D11	D11_28840237	28840237	T	C	3.2071e-07	Environmental adaptation parameter
	D11	D11_28844491	28844491	T	C	1.24826e-07	Environmental adaptation parameter
	D11	D11_28941078	28941078	C	T	1.69832e-07	Environmental adaptation parameter
	D11	D11_28946596	28946596	A	G	1.39361e-07	Environmental adaptation parameter, Phenotype value
	D11	D11_28951269	28951269	C	A	1.55065e-07	Environmental adaptation parameter
	D11	D11_28959679	28959679	T	C	1.36154e-07	Environmental adaptation parameter, Phenotype value
	D11	D11_28959807	28959807	T	C	1.58742e-07	Environmental adaptation parameter
	D11	D11_28959813	28959813	G	C	1.58742e-07	Environmental adaptation parameter
	D11	D11_28972918	28972918	G	A	7.71928e-08	Environmental adaptation parameter, Phenotype value
	D11	D11_28990696	28990696	G	A	1.94216e-07	Environmental adaptation parameter, Phenotype value
	D11	D11_28994660	28994660	A	G	5.32289e-07	Environmental adaptation parameter
	D11	D11_28997488	28997488	C	T	1.7308e-07	Environmental adaptation parameter
	D11	D11_29001931	29001931	G	A	2.66238e-07	Environmental adaptation parameter
	D11	D11_29002071	29002071	C	T	1.6208e-07	Environmental adaptation parameter
	D11	D11_29087086	29087086	G	A	1.20924e-07	Environmental adaptation parameter
	D11	D11_29087394	29087394	A	T	4.53484e-07	Environmental adaptation parameter
	D11	D11_29088102	29088102	C	T	1.81014e-07	Environmental adaptation parameter
	D11	D11_29090481	29090481	C	T	7.98343e-08	Environmental adaptation parameter
	D11	D11_29091590	29091590	G	A	4.91154e-07	Environmental adaptation parameter
	D11	D11_29095157	29095157	C	T	3.63641e-07	Environmental adaptation parameter, Phenotype value
	D11	D11_29096670	29096670	C	A	3.35483e-07	Environmental adaptation parameter
	D11	D11_29096727	29096727	T	C	3.45721e-07	Environmental adaptation parameter
	D11	D11_29097116	29097116	C	T	2.70638e-07	Environmental adaptation parameter
	D11	D11_29099531	29099531	C	T	3.14941e-07	Environmental adaptation parameter
	D11	D11_29100643	29100643	G	A	9.70203e-07	Environmental adaptation parameter
	D11	D11_29101687	29101687	G	A	4.58136e-07	Environmental adaptation parameter
	D11	D11_29103179	29103179	G	A	3.9117e-07	Environmental adaptation parameter
	D11	D11_29103502	29103502	C	A	2.0166e-07	Environmental adaptation parameter
	D11	D11_29105192	29105192	C	T	1.89752e-07	Environmental adaptation parameter
	D11	D11_29105882	29105882	C	T	5.47335e-07	Environmental adaptation parameter
	D11	D11_29107708	29107708	C	T	4.21874e-07	Environmental adaptation parameter
	D11	D11_29111375	29111375	G	A	3.28186e-07	Environmental adaptation parameter
	D11	D11_29112288	29112288	A	C	2.88283e-07	Environmental adaptation parameter
	D11	D11_29251088	29251088	C	T	7.19398e-08	Environmental adaptation parameter
	D11	D11_31913600	31913600	T	C	2.84467e-08	Environmental adaptation parameter
	D11	D11_31951689	31951689	C	T	2.30763e-08	Environmental adaptation parameter
	D11	D11_32025771	32025771	C	T	1.14679e-08	Environmental adaptation parameter
	D11	D11_33113867	33113867	G	A	3.49526e-08	Environmental adaptation parameter
	D11	D11_36609636	36609636	T	C	9.60984e-08	Environmental adaptation parameter
	D11	D11_36615464	36615464	G	A	1.35038e-07	Environmental adaptation parameter
	D11	D11_38521071	38521071	C	T	4.55387e-08	Environmental adaptation parameter
	D11	D11_39945213	39945213	C	T	8.71067e-07	Environmental adaptation parameter
	D13	D13_50537646	50537646	A	G	6.26855e-07	Environmental adaptation parameter
Fiber quality and growth period related traits	A04	A04_83568652	83568652	G	C	1.91952e-10	Environmental adaptation parameter
	A11	A11_1747273	1747273	G	A	7.08848e-07	Environmental adaptation parameter
	A11	A11_91168950	91168950	C	T	8.608e-07	Environmental adaptation parameter
	A11	A11_91174107	91174107	G	T	5.02705e-08	Environmental adaptation parameter
	A11	A11_91214063	91214063	C	T	1.1479e-07	Environmental adaptation parameter
	A11	A11_91515652	91515652	T	G	3.63794e-07	Environmental adaptation parameter
	A11	A11_91584918	91584918	T	C	6.17913e-07	Environmental adaptation parameter
	A11	A11_91674870	91674870	T	C	1.41401e-07	Environmental adaptation parameter
	A11	A11_91833760	91833760	A	T	2.12332e-07	Environmental adaptation parameter
	A11	A11_91847583	91847583	A	G	5.78365e-07	Environmental adaptation parameter
	A11	A11_92354935	92354935	C	T	5.28308e-07	Environmental adaptation parameter
	A11	A11_92641661	92641661	C	T	3.43632e-07	Environmental adaptation parameter
	A11	A11_92641679	92641679	C	T	3.9352e-07	Environmental adaptation parameter
	A11	A11_92738556	92738556	A	G	4.30688e-07	Environmental adaptation parameter
	A11	A11_92979350	92979350	A	G	8.25133e-08	Environmental adaptation parameter
Fiber quality and growth period related traits	A05	A05_24992752	24992752	A	C	6.41378e-07	Environmental adaptation parameter
	A05	A05_24992770	24992770	T	C	6.59941e-07	Environmental adaptation parameter
	A05	A05_24992772	24992772	G	A	6.41378e-07	Environmental adaptation parameter
	A05	A05_24993735	24993735	C	G	4.83664e-07	Environmental adaptation parameter
	A05	A05_24994369	24994369	A	G	9.3574e-07	Environmental adaptation parameter
	A05	A05_24994765	24994765	C	T	2.24634e-07	Environmental adaptation parameter
	A05	A05_24994905	24994905	C	A	5.80025e-07	Environmental adaptation parameter
	A05	A05_24997002	24997002	A	T	2.71446e-07	Environmental adaptation parameter
	A05	A05_24997306	24997306	T	C	8.94836e-07	Environmental adaptation parameter
	A05	A05_24997718	24997718	T	C	6.53335e-07	Environmental adaptation parameter
	A05	A05_24998126	24998126	C	T	4.58866e-07	Environmental adaptation parameter
	A05	A05_24998345	24998345	A	C	2.93622e-07	Environmental adaptation parameter
	A05	A05_24998363	24998363	A	T	3.17926e-07	Environmental adaptation parameter
	A05	A05_25007513	25007513	T	C	4.59165e-07	Environmental adaptation parameter
	A05	A05_25024127	25024127	T	A	1.12384e-07	Environmental adaptation parameter
	A05	A05_25026831	25026831	G	A	4.19002e-07	Environmental adaptation parameter
	A05	A05_25097791	25097791	T	A	3.66311e-07	Environmental adaptation parameter
	A05	A05_25102747	25102747	C	A	6.18379e-07	Environmental adaptation parameter
	D03	D03_39082094	39082094	T	C	4.08147e-07	Phenotype value
