# Supplementary material for: Deep learning-based phenotype prediction analysis of genotype-environment interactions and mining of environmentally stable germplasm and elite loci in cotton
Source: Research Square preprint supplement (doi:10.21203/rs.3.rs-7483914/v1), 2025-09-11
Supplement: Supplementary file 11 [file ec7c2a6d5d297aaf6c4d9bfc.xlsx]

## Sheet: quantitative statistics
Supplementary Table 10. The number of environment-specific and shared Main-SNPs using phenotype values of 419 upland cotton from six locations for GWAS
Triat category	Traits	Enviroment	Numbers
Fiber quality related-traits	FL	AY, CZ, DH, JZ, XJ, YC	192
		DH	11
		JZ	9
		XJ	20
		YC	29
	FS	CZ,XJ,DH	98
		CZ	270
		DH	5
		XJ	23
	M	AY	4
		DH	6
		JZ	1
		XJ	1
		YC	153
	LU	AY	7
		DH	39
		JZ	11
		XJ	1
		YC	7
Growth period related-traits	SBno	AY	3
		YC	8
	SBnode	AY	116
		DH	1
		JZ	1
	FD	AY, CZ, DH, JZ, XJ, YC	3
		AY	928
		CZ	3
		DH	1
		YC	1
	GP	AY	503
		CZ	1
		XJ	1
Fiber yield related-traits	FWPB	AY	1
		CZ	14
		DH	13
		JZ	21
		XJ	6
		YC	147
	BW	CZ	1
	LP	CZ	306
		DH	2
		JZ	3
		XJ	8
		YC	41
	BPP	CZ	1
		DH	5
		JZ	8
		YC	2
	SI	AY, CZ, DH, JZ, XJ, YC	1
		DH	9
		XJ	4

## Sheet: The AY-specific Main-SNPs
Supplementary Table 10. The AY-specific Main-SNPs using phenotype values of 419 upland cotton for GWAS
Trait	Chromosome	Maker	Position (bp)	allele1	allele0	P-value
SBnode	D03	D03_6456840	6456840	A	T	4.14137e-07
	D03	D03_6462527	6462527	T	C	4.41448e-07
	D03	D03_6923832	6923832	A	T	1.8367e-07
	D03	D03_8384895	8384895	T	C	2.09263e-08
	D03	D03_8434200	8434200	A	G	3.27729e-08
	D03	D03_8442915	8442915	A	G	1.58426e-07
	D03	D03_8613832	8613832	A	G	9.40378e-07
	D03	D03_8969276	8969276	A	G	4.27194e-08
	D03	D03_8972839	8972839	T	C	4.34648e-08
	D03	D03_9009158	9009158	T	C	3.18904e-08
	D03	D03_11767161	11767161	T	C	6.11497e-07
	D03	D03_11937337	11937337	A	C	3.59159e-07
	D03	D03_12223758	12223758	A	G	6.53203e-07
	D03	D03_12356743	12356743	T	C	5.23719e-07
	D03	D03_12452528	12452528	T	G	1.12172e-07
	D03	D03_12550687	12550687	A	G	3.00323e-07
	D03	D03_12564028	12564028	T	C	5.38756e-07
	D03	D03_12666878	12666878	T	C	6.71705e-07
	D03	D03_12866965	12866965	T	C	1.99429e-07
	D03	D03_12879837	12879837	A	G	2.31844e-07
	D03	D03_13001983	13001983	T	C	2.0573e-07
	D03	D03_13067766	13067766	T	C	5.71115e-07
	D03	D03_13097995	13097995	A	G	4.1918e-07
	D03	D03_13830742	13830742	T	C	8.46571e-07
	D03	D03_13846946	13846946	T	C	1.93452e-07
	D03	D03_14858860	14858860	T	C	1.97721e-07
	D03	D03_14900494	14900494	G	T	2.91877e-07
	D03	D03_14946357	14946357	T	C	3.69721e-07
	D03	D03_14979226	14979226	C	G	1.50332e-07
	D03	D03_14993393	14993393	T	C	3.39629e-07
	D03	D03_15207816	15207816	G	T	3.4931e-07
	D03	D03_15367340	15367340	T	C	5.0112e-07
	D03	D03_15780763	15780763	T	G	2.75217e-07
	D03	D03_16207558	16207558	A	C	2.26821e-07
	D03	D03_16567267	16567267	A	G	1.864e-07
	D03	D03_16765857	16765857	T	C	2.51875e-07
	D03	D03_16937465	16937465	G	C	2.91805e-07
	D03	D03_17412579	17412579	T	G	2.73152e-07
	D03	D03_17426327	17426327	T	A	2.86146e-07
	D03	D03_17511702	17511702	A	G	3.08496e-07
	D03	D03_17577963	17577963	A	G	3.12961e-07
	D03	D03_17829428	17829428	G	C	3.6859e-07
	D03	D03_17872478	17872478	T	G	3.51323e-07
	D03	D03_18204058	18204058	G	A	4.44109e-07
	D03	D03_18249860	18249860	T	C	4.94742e-07
	D03	D03_18432078	18432078	A	G	4.00703e-07
	D03	D03_18520030	18520030	T	C	3.03303e-07
	D03	D03_18766666	18766666	T	C	2.38986e-07
	D03	D03_18878901	18878901	A	G	4.27753e-07
	D03	D03_18882013	18882013	A	G	8.49936e-07
	D03	D03_18904283	18904283	T	A	4.28736e-07
	D03	D03_18919640	18919640	A	G	2.82819e-07
	D03	D03_19558150	19558150	A	G	2.16724e-07
	D03	D03_19558683	19558683	G	T	4.92088e-07
	D03	D03_19812003	19812003	G	C	1.58452e-07
	D03	D03_19843532	19843532	T	C	3.45772e-07
	D03	D03_20084293	20084293	C	T	3.64537e-08
	D03	D03_32124775	32124775	C	T	2.66125e-08
	D03	D03_32124785	32124785	C	T	2.74049e-08
	D03	D03_32141730	32141730	T	G	6.83663e-09
	D03	D03_32142663	32142663	A	G	5.66928e-08
	D03	D03_32150956	32150956	G	T	3.01107e-09
	D03	D03_32178551	32178551	G	T	9.95008e-07
	D03	D03_32184761	32184761	C	T	1.43301e-08
	D03	D03_32196342	32196342	C	T	8.92436e-07
	D03	D03_32213774	32213774	A	C	6.51322e-09
	D03	D03_32227945	32227945	G	A	8.58001e-07
	D03	D03_32241802	32241802	C	A	2.3658e-08
	D03	D03_32244084	32244084	G	T	5.82503e-08
	D03	D03_32265352	32265352	A	G	9.7266e-07
	D03	D03_32266417	32266417	G	A	4.71891e-09
	D03	D03_32267167	32267167	A	G	7.06368e-07
	D03	D03_32268044	32268044	G	A	7.50589e-07
	D03	D03_32270315	32270315	G	C	2.69124e-09
	D03	D03_32307278	32307278	C	T	2.53598e-07
	D03	D03_32364150	32364150	G	A	4.77379e-08
	D03	D03_32404566	32404566	A	G	9.79383e-07
	D03	D03_32405071	32405071	C	T	1.18177e-08
	D03	D03_32435404	32435404	C	T	4.46456e-07
	D03	D03_32441184	32441184	G	A	9.89454e-07
	D03	D03_32447866	32447866	C	T	5.97715e-09
	D03	D03_32545549	32545549	C	A	2.17763e-07
	D03	D03_32581569	32581569	G	A	9.397e-07
	D03	D03_32586255	32586255	T	A	9.5623e-07
	D03	D03_32891947	32891947	C	T	7.92152e-09
	D03	D03_32892031	32892031	G	A	2.08425e-08
	D03	D03_32895604	32895604	C	A	1.44426e-07
	D03	D03_32895605	32895605	G	A	1.44426e-07
	D03	D03_32895717	32895717	C	T	1.5618e-07
	D03	D03_32895928	32895928	A	G	1.47833e-07
	D03	D03_38522475	38522475	A	G	1.03775e-07
	D03	D03_38848767	38848767	T	C	9.96015e-11
	D03	D03_38936917	38936917	A	G	9.51387e-11
	D03	D03_38938264	38938264	T	C	5.26704e-08
	D03	D03_38957276	38957276	A	G	7.89888e-11
	D03	D03_38987361	38987361	G	A	5.35451e-11
	D03	D03_39036788	39036788	A	G	2.20251e-10
	D03	D03_39059385	39059385	T	G	2.43077e-11
	D03	D03_39082094	39082094	T	C	4.85332e-12
	D03	D03_39132242	39132242	A	C	6.03994e-11
	D03	D03_39145574	39145574	A	G	2.88078e-08
	D03	D03_39184099	39184099	C	A	3.10517e-07
	D03	D03_39302247	39302247	T	C	5.27762e-08
	D03	D03_39378324	39378324	A	G	1.01334e-08
	D03	D03_39459873	39459873	T	C	1.40448e-10
	D03	D03_39477406	39477406	T	C	5.81323e-07
	D03	D03_39491480	39491480	A	G	2.51e-09
	D03	D03_39497921	39497921	T	C	1.30591e-10
	D03	D03_39672998	39672998	T	C	1.55553e-08
	D03	D03_39887149	39887149	G	T	1.95829e-07
	D03	D03_39892732	39892732	T	C	4.2004e-08
	D03	D03_40054964	40054964	A	G	1.64835e-09
	D03	D03_40088035	40088035	A	G	1.29921e-09
	D03	D03_40979761	40979761	A	G	8.81021e-07
	D03	D03_41096103	41096103	A	G	1.73656e-07
	D03	D03_41122803	41122803	T	C	8.95265e-07
GP	D03	D03_6456840	6456840	A	T	1.87818e-07
	D03	D03_6462527	6462527	T	C	4.70024e-07
	D03	D03_6629790	6629790	A	G	8.96655e-08
	D03	D03_6850857	6850857	T	G	1.94952e-07
	D03	D03_6923832	6923832	A	T	2.3158e-09
	D03	D03_8283737	8283737	T	C	2.34462e-09
	D03	D03_8384895	8384895	T	C	1.09326e-09
	D03	D03_8434200	8434200	A	G	5.78303e-09
	D03	D03_8442915	8442915	A	G	6.04336e-08
	D03	D03_8613832	8613832	A	G	6.37708e-08
	D03	D03_8969276	8969276	A	G	2.34316e-08
	D03	D03_8972839	8972839	T	C	3.71582e-09
	D03	D03_9009158	9009158	T	C	4.14518e-09
	D03	D03_11767161	11767161	T	C	4.51498e-09
	D03	D03_11937337	11937337	A	C	3.21328e-09
	D03	D03_12223758	12223758	A	G	5.03284e-09
	D03	D03_12356743	12356743	T	C	6.22332e-08
	D03	D03_12402144	12402144	T	C	5.43226e-08
	D03	D03_12452528	12452528	T	G	7.22751e-09
	D03	D03_12525951	12525951	T	C	2.46134e-07
	D03	D03_12550687	12550687	A	G	1.15057e-08
	D03	D03_12564028	12564028	T	C	1.75347e-08
	D03	D03_12666878	12666878	T	C	5.28494e-08
	D03	D03_12866965	12866965	T	C	1.59724e-08
	D03	D03_12879837	12879837	A	G	1.10548e-08
	D03	D03_13001983	13001983	T	C	4.12119e-10
	D03	D03_13067766	13067766	T	C	1.98979e-08
	D03	D03_13097995	13097995	A	G	5.79888e-08
	D03	D03_13178906	13178906	T	G	2.47771e-07
	D03	D03_13203222	13203222	A	G	4.89455e-07
	D03	D03_13206050	13206050	T	C	9.81814e-07
	D03	D03_13222662	13222662	T	C	1.82623e-07
	D03	D03_13563114	13563114	G	A	1.28296e-07
	D03	D03_13830742	13830742	T	C	3.84744e-08
	D03	D03_13846946	13846946	T	C	1.03946e-08
	D03	D03_14540855	14540855	A	C	5.03851e-07
	D03	D03_14858860	14858860	T	C	7.64935e-08
	D03	D03_14900494	14900494	G	T	1.56522e-08
	D03	D03_14946357	14946357	T	C	1.79963e-08
	D03	D03_14979226	14979226	C	G	1.39052e-08
	D03	D03_14993393	14993393	T	C	1.66522e-08
	D03	D03_15207816	15207816	G	T	1.73867e-07
	D03	D03_15367340	15367340	T	C	1.03918e-07
	D03	D03_15720805	15720805	A	G	4.47955e-07
	D03	D03_15780763	15780763	T	G	1.18917e-08
	D03	D03_15982763	15982763	T	C	2.28514e-07
	D03	D03_16207558	16207558	A	C	1.03782e-08
	D03	D03_16567267	16567267	A	G	5.18197e-09
	D03	D03_16765857	16765857	T	C	1.4946e-08
	D03	D03_16937465	16937465	G	C	1.55844e-08
	D03	D03_17412579	17412579	T	G	6.58381e-09
	D03	D03_17426327	17426327	T	A	6.62875e-09
	D03	D03_17511702	17511702	A	G	1.3349e-08
	D03	D03_17555741	17555741	A	G	1.91951e-07
	D03	D03_17577963	17577963	A	G	1.16355e-08
	D03	D03_17711647	17711647	C	T	7.95768e-07
	D03	D03_17792270	17792270	T	C	1.19368e-07
	D03	D03_17829428	17829428	G	C	1.00011e-08
	D03	D03_17872478	17872478	T	G	9.10268e-09
	D03	D03_17881259	17881259	T	C	1.28188e-08
	D03	D03_18204058	18204058	G	A	5.28224e-08
	D03	D03_18249860	18249860	T	C	1.86714e-08
	D03	D03_18432078	18432078	A	G	1.85232e-08
	D03	D03_18520030	18520030	T	C	7.01976e-10
	D03	D03_18766666	18766666	T	C	3.82262e-09
	D03	D03_18878901	18878901	A	G	8.40267e-09
	D03	D03_18882013	18882013	A	G	4.25938e-09
	D03	D03_18904283	18904283	T	A	2.07335e-08
	D03	D03_18919640	18919640	A	G	1.53157e-08
	D03	D03_19558150	19558150	A	G	1.96085e-09
	D03	D03_19558683	19558683	G	T	3.41702e-07
	D03	D03_19812003	19812003	G	C	1.32553e-08
	D03	D03_19843532	19843532	T	C	2.41725e-08
	D03	D03_19935210	19935210	A	G	7.80491e-08
	D03	D03_20084293	20084293	C	T	2.66784e-07
	D03	D03_21448955	21448955	A	C	1.34657e-07
	D03	D03_22532351	22532351	T	C	6.25872e-07
	D03	D03_22710753	22710753	A	G	1.04042e-07
	D03	D03_22736336	22736336	G	A	6.21687e-08
	D03	D03_23012304	23012304	A	G	5.91433e-07
	D03	D03_24093064	24093064	A	G	7.29516e-07
	D03	D03_24216876	24216876	A	G	6.27773e-07
	D03	D03_24607075	24607075	A	G	1.75619e-07
	D03	D03_24635335	24635335	A	G	8.49692e-07
	D03	D03_24974968	24974968	A	G	4.30468e-07
	D03	D03_26045000	26045000	A	G	4.75285e-07
	D03	D03_26719099	26719099	A	G	4.63227e-07
	D03	D03_27286023	27286023	T	C	7.65737e-07
	D03	D03_28112070	28112070	C	T	8.26416e-07
	D03	D03_28296945	28296945	T	G	4.32195e-07
	D03	D03_28718239	28718239	T	C	7.85294e-07
	D03	D03_28837284	28837284	A	G	8.47052e-07
	D03	D03_28947740	28947740	A	G	5.52352e-07
	D03	D03_29961777	29961777	T	G	1.66064e-07
	D03	D03_29972984	29972984	C	T	9.40201e-07
	D03	D03_30314810	30314810	A	C	1.76921e-07
	D03	D03_32103904	32103904	C	T	7.96908e-07
	D03	D03_32104312	32104312	T	C	7.1882e-07
	D03	D03_32108981	32108981	G	T	2.6049e-07
	D03	D03_32117779	32117779	C	T	2.63846e-07
	D03	D03_32122807	32122807	G	A	4.94202e-08
	D03	D03_32124775	32124775	C	T	4.09107e-08
	D03	D03_32124785	32124785	C	T	4.24635e-08
	D03	D03_32125779	32125779	A	C	6.63834e-07
	D03	D03_32126409	32126409	A	C	3.11995e-08
	D03	D03_32128364	32128364	G	A	4.28058e-07
	D03	D03_32129777	32129777	C	T	5.49614e-07
	D03	D03_32129826	32129826	G	A	1.02689e-07
	D03	D03_32130143	32130143	G	A	2.95373e-07
	D03	D03_32131653	32131653	C	A	2.64642e-07
	D03	D03_32133086	32133086	A	C	3.83843e-07
	D03	D03_32133993	32133993	T	C	8.19631e-07
	D03	D03_32134697	32134697	C	T	6.94786e-07
	D03	D03_32134989	32134989	C	A	2.48464e-07
	D03	D03_32136602	32136602	T	C	1.66241e-07
	D03	D03_32136658	32136658	A	T	2.29255e-07
	D03	D03_32138698	32138698	G	T	9.52368e-07
	D03	D03_32138930	32138930	A	C	2.83102e-07
	D03	D03_32138975	32138975	C	T	9.59986e-07
	D03	D03_32141503	32141503	T	A	9.13541e-07
	D03	D03_32141686	32141686	C	T	6.06088e-08
	D03	D03_32141730	32141730	T	G	1.09687e-08
	D03	D03_32142663	32142663	A	G	2.73636e-07
	D03	D03_32145238	32145238	C	T	2.37994e-07
	D03	D03_32145239	32145239	C	T	2.59582e-07
	D03	D03_32145270	32145270	A	C	1.6278e-08
	D03	D03_32145447	32145447	T	C	9.76176e-07
	D03	D03_32145526	32145526	G	A	7.11776e-07
	D03	D03_32145530	32145530	C	T	7.14824e-07
	D03	D03_32146941	32146941	C	T	1.30399e-07
	D03	D03_32148031	32148031	G	A	3.11278e-07
	D03	D03_32148049	32148049	A	G	7.49231e-08
	D03	D03_32148321	32148321	C	T	7.67694e-07
	D03	D03_32148484	32148484	T	C	2.03649e-07
	D03	D03_32148779	32148779	A	G	1.52631e-07
	D03	D03_32148837	32148837	G	A	1.19161e-07
	D03	D03_32149055	32149055	T	A	6.63313e-07
	D03	D03_32150285	32150285	G	A	5.06008e-07
	D03	D03_32150703	32150703	C	T	7.85267e-08
	D03	D03_32150956	32150956	G	T	2.06762e-08
	D03	D03_32163352	32163352	G	A	2.049e-07
	D03	D03_32164129	32164129	A	G	5.84e-07
	D03	D03_32164440	32164440	C	T	7.2555e-07
	D03	D03_32165017	32165017	A	T	2.50698e-07
	D03	D03_32167241	32167241	G	A	9.0072e-07
	D03	D03_32169120	32169120	T	C	2.75999e-07
	D03	D03_32169157	32169157	C	T	2.91078e-07
	D03	D03_32169514	32169514	C	G	7.13762e-07
	D03	D03_32169723	32169723	C	T	7.15104e-07
	D03	D03_32169778	32169778	T	A	1.76321e-07
	D03	D03_32174320	32174320	G	A	6.13096e-07
	D03	D03_32174323	32174323	T	C	6.13096e-07
	D03	D03_32174424	32174424	A	C	2.35718e-07
	D03	D03_32176853	32176853	A	G	9.85062e-07
	D03	D03_32177005	32177005	G	T	6.3793e-07
	D03	D03_32177916	32177916	C	T	2.15234e-07
	D03	D03_32178132	32178132	A	G	2.97759e-07
	D03	D03_32178157	32178157	C	T	2.87918e-07
	D03	D03_32178179	32178179	G	A	3.10458e-07
	D03	D03_32178384	32178384	C	T	1.95908e-07
	D03	D03_32178529	32178529	G	A	8.06109e-07
	D03	D03_32178597	32178597	A	C	5.12161e-07
	D03	D03_32179082	32179082	G	A	9.89818e-07
	D03	D03_32179168	32179168	G	A	2.7236e-07
	D03	D03_32179181	32179181	G	T	2.70411e-07
	D03	D03_32179540	32179540	G	A	8.69338e-07
	D03	D03_32179682	32179682	A	G	3.1464e-07
	D03	D03_32184474	32184474	A	G	8.2462e-07
	D03	D03_32184761	32184761	C	T	5.17201e-08
	D03	D03_32190534	32190534	G	A	8.19668e-07
	D03	D03_32191569	32191569	A	G	9.02733e-07
	D03	D03_32196278	32196278	T	A	3.58073e-07
	D03	D03_32196342	32196342	C	T	2.18867e-07
	D03	D03_32196458	32196458	G	A	7.29128e-07
	D03	D03_32196494	32196494	T	G	2.17696e-08
	D03	D03_32196786	32196786	G	A	4.48211e-07
	D03	D03_32197139	32197139	C	T	5.89561e-07
	D03	D03_32197372	32197372	C	G	2.28525e-07
	D03	D03_32197421	32197421	G	T	1.00695e-07
	D03	D03_32199513	32199513	G	A	5.16924e-07
	D03	D03_32200012	32200012	C	G	1.1161e-08
	D03	D03_32200147	32200147	T	C	4.33296e-08
	D03	D03_32200163	32200163	T	C	4.32477e-08
	D03	D03_32200362	32200362	G	C	1.79229e-07
	D03	D03_32200364	32200364	T	A	1.70605e-07
	D03	D03_32200718	32200718	T	C	2.76302e-07
	D03	D03_32201343	32201343	A	G	3.71307e-07
	D03	D03_32201355	32201355	A	G	4.72741e-07
	D03	D03_32201583	32201583	G	A	8.13301e-07
	D03	D03_32201593	32201593	T	C	8.53641e-07
	D03	D03_32202181	32202181	T	C	6.86313e-07
	D03	D03_32202337	32202337	G	A	9.13366e-07
	D03	D03_32202349	32202349	G	A	3.17567e-07
	D03	D03_32202386	32202386	A	G	1.03415e-07
	D03	D03_32208096	32208096	A	T	6.41027e-07
	D03	D03_32208329	32208329	C	T	1.66299e-07
	D03	D03_32210287	32210287	C	T	3.86584e-07
	D03	D03_32210346	32210346	C	T	9.42053e-07
	D03	D03_32211708	32211708	T	C	8.36063e-07
	D03	D03_32212428	32212428	T	C	2.44261e-07
	D03	D03_32212605	32212605	G	A	7.76248e-07
	D03	D03_32212750	32212750	T	C	6.26676e-07
	D03	D03_32213063	32213063	A	C	7.01598e-07
	D03	D03_32213342	32213342	T	C	2.42943e-07
	D03	D03_32213586	32213586	T	A	4.50925e-07
	D03	D03_32213628	32213628	A	G	3.76832e-07
	D03	D03_32213774	32213774	A	C	2.47906e-08
	D03	D03_32214769	32214769	C	T	7.86306e-07
	D03	D03_32214958	32214958	T	A	2.23066e-07
	D03	D03_32216116	32216116	G	A	3.85395e-07
	D03	D03_32221170	32221170	T	C	7.12817e-07
	D03	D03_32223837	32223837	G	A	5.27776e-07
	D03	D03_32223979	32223979	G	C	5.22075e-07
	D03	D03_32225162	32225162	A	T	1.83596e-07
	D03	D03_32225173	32225173	T	C	1.72214e-07
	D03	D03_32225217	32225217	G	T	3.09025e-07
	D03	D03_32225478	32225478	A	G	9.97255e-07
	D03	D03_32225575	32225575	T	C	9.50514e-07
	D03	D03_32225776	32225776	T	A	3.00574e-07
	D03	D03_32225812	32225812	T	C	2.63827e-07
	D03	D03_32226339	32226339	C	T	3.69682e-07
	D03	D03_32226356	32226356	A	G	4.35965e-07
	D03	D03_32226574	32226574	G	T	7.89266e-07
	D03	D03_32226631	32226631	T	C	9.19244e-07
	D03	D03_32227260	32227260	A	G	1.8535e-07
	D03	D03_32227299	32227299	A	G	2.13624e-07
	D03	D03_32227307	32227307	T	C	1.7101e-07
	D03	D03_32227322	32227322	G	A	1.68816e-07
	D03	D03_32227340	32227340	A	G	1.71056e-07
	D03	D03_32227386	32227386	C	T	7.53287e-07
	D03	D03_32227464	32227464	T	C	2.21969e-07
	D03	D03_32229045	32229045	A	G	1.11732e-08
	D03	D03_32230515	32230515	T	C	2.47088e-07
	D03	D03_32231888	32231888	G	C	3.78034e-07
	D03	D03_32233003	32233003	G	A	6.18918e-07
	D03	D03_32234431	32234431	C	T	2.24982e-07
	D03	D03_32234715	32234715	A	C	6.01698e-07
	D03	D03_32234784	32234784	C	T	8.84966e-07
	D03	D03_32235962	32235962	G	T	4.44394e-07
	D03	D03_32235995	32235995	C	T	4.94971e-07
	D03	D03_32236174	32236174	G	A	9.78138e-07
	D03	D03_32236331	32236331	C	T	6.59418e-07
	D03	D03_32236345	32236345	T	C	3.84643e-07
	D03	D03_32236538	32236538	G	A	2.59319e-07
	D03	D03_32236606	32236606	A	G	5.28212e-07
	D03	D03_32236811	32236811	C	T	5.54299e-08
	D03	D03_32237259	32237259	C	T	1.71383e-07
	D03	D03_32238281	32238281	T	G	2.46153e-08
	D03	D03_32240290	32240290	T	G	9.97391e-07
	D03	D03_32240443	32240443	T	C	5.49873e-07
	D03	D03_32240897	32240897	T	G	1.93092e-07
	D03	D03_32241038	32241038	C	A	2.66247e-07
	D03	D03_32241081	32241081	C	T	2.28302e-07
	D03	D03_32241802	32241802	C	A	2.16469e-07
	D03	D03_32242945	32242945	T	C	2.07425e-07
	D03	D03_32243024	32243024	A	G	5.94994e-07
	D03	D03_32243026	32243026	C	T	6.33345e-07
	D03	D03_32244084	32244084	G	T	1.89255e-07
	D03	D03_32244399	32244399	A	G	5.83323e-07
	D03	D03_32244442	32244442	G	A	5.17794e-07
	D03	D03_32244476	32244476	G	C	5.8091e-07
	D03	D03_32246157	32246157	T	A	9.43306e-07
	D03	D03_32246348	32246348	A	G	9.37197e-07
	D03	D03_32246460	32246460	G	A	1.93741e-07
	D03	D03_32246487	32246487	C	T	4.27664e-07
	D03	D03_32246678	32246678	T	C	9.62804e-07
	D03	D03_32246723	32246723	G	A	9.53176e-07
	D03	D03_32247031	32247031	C	T	2.45414e-07
	D03	D03_32247155	32247155	G	A	1.88469e-07
	D03	D03_32247437	32247437	G	C	8.65403e-07
	D03	D03_32247543	32247543	G	C	3.01188e-07
	D03	D03_32248052	32248052	A	G	2.32591e-07
	D03	D03_32248091	32248091	G	A	1.81337e-07
	D03	D03_32248111	32248111	G	A	1.87128e-07
	D03	D03_32248184	32248184	A	T	1.9827e-07
	D03	D03_32248408	32248408	A	C	7.92995e-07
	D03	D03_32248470	32248470	G	A	8.21146e-07
	D03	D03_32248471	32248471	G	A	8.21146e-07
	D03	D03_32248783	32248783	C	T	1.27229e-08
	D03	D03_32254178	32254178	G	T	3.15587e-08
	D03	D03_32255194	32255194	C	T	2.1849e-07
	D03	D03_32255202	32255202	G	A	2.1849e-07
	D03	D03_32256508	32256508	T	C	2.51303e-07
	D03	D03_32257205	32257205	A	G	2.70996e-07
	D03	D03_32257259	32257259	C	T	6.81055e-07
	D03	D03_32257605	32257605	G	A	1.2153e-07
	D03	D03_32258427	32258427	G	T	9.49184e-07
	D03	D03_32258456	32258456	A	T	4.81789e-07
	D03	D03_32258633	32258633	C	T	6.20209e-07
	D03	D03_32259235	32259235	T	C	7.38715e-07
	D03	D03_32260315	32260315	C	A	8.27871e-08
	D03	D03_32260803	32260803	C	G	8.33523e-07
	D03	D03_32260960	32260960	G	A	8.65026e-07
	D03	D03_32261178	32261178	A	T	3.21811e-08
	D03	D03_32261180	32261180	T	C	3.75476e-08
	D03	D03_32261420	32261420	G	A	2.73441e-07
	D03	D03_32262168	32262168	G	C	2.15026e-07
	D03	D03_32262836	32262836	C	T	4.26003e-07
	D03	D03_32263299	32263299	C	A	8.97217e-07
	D03	D03_32263339	32263339	T	G	2.35473e-07
	D03	D03_32263354	32263354	A	G	2.31835e-07
	D03	D03_32264275	32264275	T	A	5.72057e-07
	D03	D03_32265352	32265352	A	G	1.85153e-07
	D03	D03_32266153	32266153	T	C	2.93856e-07
	D03	D03_32266166	32266166	C	T	2.65024e-07
	D03	D03_32266233	32266233	T	C	2.24665e-07
	D03	D03_32266417	32266417	G	A	7.55114e-09
	D03	D03_32267559	32267559	G	A	1.50297e-07
	D03	D03_32268043	32268043	C	T	2.01942e-07
	D03	D03_32268044	32268044	G	A	3.5223e-07
	D03	D03_32270276	32270276	A	G	9.20378e-09
	D03	D03_32270315	32270315	G	C	3.28371e-09
	D03	D03_32270849	32270849	G	T	1.50551e-07
	D03	D03_32274097	32274097	A	G	9.00864e-07
	D03	D03_32280329	32280329	G	T	6.81456e-07
	D03	D03_32280342	32280342	T	C	6.72709e-07
	D03	D03_32280370	32280370	A	G	8.366e-07
	D03	D03_32280387	32280387	C	T	7.55132e-07
	D03	D03_32280467	32280467	T	C	8.78047e-07
	D03	D03_32280491	32280491	G	A	9.07595e-07
	D03	D03_32281234	32281234	G	A	2.61907e-07
	D03	D03_32281260	32281260	C	T	3.30125e-07
	D03	D03_32281528	32281528	C	T	8.2402e-07
	D03	D03_32281544	32281544	G	T	6.61372e-07
	D03	D03_32282681	32282681	C	T	7.88204e-07
	D03	D03_32283157	32283157	T	C	2.13401e-07
	D03	D03_32283195	32283195	G	A	1.71603e-07
	D03	D03_32283207	32283207	G	A	1.73491e-07
	D03	D03_32286688	32286688	A	T	5.2726e-07
	D03	D03_32287050	32287050	T	A	6.37321e-08
	D03	D03_32293989	32293989	C	T	2.19548e-07
	D03	D03_32295152	32295152	C	T	2.86058e-07
	D03	D03_32295729	32295729	T	G	1.58291e-07
	D03	D03_32295759	32295759	G	C	5.63052e-07
	D03	D03_32295896	32295896	G	A	1.98404e-07
	D03	D03_32296152	32296152	A	T	2.33809e-07
	D03	D03_32303171	32303171	C	T	2.69711e-07
	D03	D03_32307152	32307152	C	A	2.8928e-07
	D03	D03_32307278	32307278	C	T	8.69059e-07
	D03	D03_32310877	32310877	G	T	2.45004e-07
	D03	D03_32318930	32318930	C	T	2.18953e-07
	D03	D03_32318961	32318961	T	C	2.87757e-07
	D03	D03_32331881	32331881	A	G	9.78874e-07
	D03	D03_32331888	32331888	T	A	9.78874e-07
	D03	D03_32332693	32332693	G	A	2.70487e-07
	D03	D03_32332735	32332735	G	T	3.30405e-07
	D03	D03_32333034	32333034	A	G	6.75302e-07
	D03	D03_32336089	32336089	G	T	3.10576e-07
	D03	D03_32338598	32338598	T	C	8.48882e-07
	D03	D03_32338623	32338623	T	G	7.31174e-07
	D03	D03_32346527	32346527	C	T	8.89899e-07
	D03	D03_32348757	32348757	C	T	1.84174e-07
	D03	D03_32348827	32348827	A	C	7.70569e-07
	D03	D03_32354534	32354534	G	A	5.70187e-07
	D03	D03_32357800	32357800	T	C	4.05953e-07
	D03	D03_32357966	32357966	A	G	2.71737e-07
	D03	D03_32361341	32361341	C	T	5.34974e-07
	D03	D03_32364150	32364150	G	A	6.12765e-07
	D03	D03_32368844	32368844	G	A	7.23562e-08
	D03	D03_32371228	32371228	A	G	5.84306e-07
	D03	D03_32371253	32371253	A	G	5.15402e-07
	D03	D03_32374085	32374085	A	C	2.07316e-07
	D03	D03_32374118	32374118	G	A	7.28431e-07
	D03	D03_32374382	32374382	C	A	2.94883e-07
	D03	D03_32374393	32374393	C	T	2.39136e-07
	D03	D03_32379264	32379264	G	A	3.0292e-07
	D03	D03_32383997	32383997	C	T	6.59477e-07
	D03	D03_32384387	32384387	G	A	6.59339e-07
	D03	D03_32385302	32385302	G	A	3.29707e-07
	D03	D03_32385323	32385323	T	C	4.08317e-07
	D03	D03_32385372	32385372	C	A	2.96211e-07
	D03	D03_32385389	32385389	G	A	2.9261e-07
	D03	D03_32385392	32385392	T	G	2.9261e-07
	D03	D03_32392771	32392771	G	A	9.97009e-07
	D03	D03_32393358	32393358	G	A	1.94776e-07
	D03	D03_32396852	32396852	T	C	5.16958e-07
	D03	D03_32402623	32402623	G	C	5.6782e-08
	D03	D03_32404722	32404722	C	A	3.96373e-07
	D03	D03_32405041	32405041	C	T	2.44185e-07
	D03	D03_32405071	32405071	C	T	1.33356e-07
	D03	D03_32405339	32405339	T	A	7.06872e-07
	D03	D03_32408532	32408532	G	A	1.52462e-07
	D03	D03_32408655	32408655	T	C	9.33133e-07
	D03	D03_32408769	32408769	C	A	8.95904e-07
	D03	D03_32416422	32416422	T	C	8.22847e-07
	D03	D03_32417289	32417289	A	G	9.56449e-07
	D03	D03_32417601	32417601	C	T	3.62529e-07
	D03	D03_32417653	32417653	A	G	5.51908e-07
	D03	D03_32417654	32417654	C	T	5.51908e-07
	D03	D03_32417737	32417737	C	T	1.50827e-07
	D03	D03_32417841	32417841	C	T	4.5107e-07
	D03	D03_32418040	32418040	G	C	1.64503e-07
	D03	D03_32418086	32418086	A	G	6.59096e-07
	D03	D03_32418103	32418103	C	T	8.57163e-07
	D03	D03_32418150	32418150	A	G	6.16636e-07
	D03	D03_32418184	32418184	T	G	6.57427e-07
	D03	D03_32432173	32432173	G	A	6.52423e-07
	D03	D03_32432470	32432470	C	T	6.71237e-07
	D03	D03_32433152	32433152	T	A	2.48957e-07
	D03	D03_32433176	32433176	A	C	2.60587e-07
	D03	D03_32435371	32435371	A	G	7.25732e-07
	D03	D03_32435404	32435404	C	T	2.12891e-08
	D03	D03_32435780	32435780	T	G	4.29037e-07
	D03	D03_32436119	32436119	C	T	7.01624e-07
	D03	D03_32436194	32436194	T	C	1.81439e-07
	D03	D03_32436207	32436207	G	A	2.00756e-07
	D03	D03_32436380	32436380	T	C	3.84229e-07
	D03	D03_32436611	32436611	G	A	9.75722e-08
	D03	D03_32436654	32436654	C	T	6.15533e-08
	D03	D03_32436862	32436862	G	A	4.35014e-08
	D03	D03_32436876	32436876	C	T	2.76968e-07
	D03	D03_32436898	32436898	T	C	3.87029e-08
	D03	D03_32437194	32437194	C	T	2.67112e-07
	D03	D03_32437344	32437344	G	A	7.18932e-07
	D03	D03_32437427	32437427	T	G	9.7458e-07
	D03	D03_32437521	32437521	C	A	2.25274e-07
	D03	D03_32437965	32437965	C	T	2.34178e-07
	D03	D03_32438121	32438121	C	T	2.57502e-07
	D03	D03_32438693	32438693	C	T	5.57387e-07
	D03	D03_32439268	32439268	A	G	9.79025e-07
	D03	D03_32439272	32439272	T	G	9.79025e-07
	D03	D03_32439964	32439964	G	T	2.22246e-07
	D03	D03_32445365	32445365	A	G	3.20723e-07
	D03	D03_32445930	32445930	T	A	8.86425e-07
	D03	D03_32447866	32447866	C	T	5.09791e-08
	D03	D03_32452555	32452555	T	A	8.07878e-07
	D03	D03_32453190	32453190	T	C	1.69579e-07
	D03	D03_32459330	32459330	T	A	7.10194e-07
	D03	D03_32459973	32459973	T	A	8.49527e-07
	D03	D03_32464800	32464800	T	C	2.54508e-07
	D03	D03_32478189	32478189	T	C	6.14318e-07
	D03	D03_32478477	32478477	A	G	8.16733e-07
	D03	D03_32479852	32479852	C	T	2.14176e-07
	D03	D03_32484215	32484215	C	T	2.64215e-07
	D03	D03_32486287	32486287	T	G	7.25942e-07
	D03	D03_32503638	32503638	T	C	9.48988e-07
	D03	D03_32504382	32504382	G	T	8.83211e-07
	D03	D03_32520555	32520555	A	C	2.95408e-07
	D03	D03_32533108	32533108	A	G	5.00594e-07
	D03	D03_32535122	32535122	G	T	7.93038e-07
	D03	D03_32541741	32541741	G	A	2.14755e-07
	D03	D03_32542724	32542724	C	T	2.08014e-07
	D03	D03_32543698	32543698	C	T	6.86749e-07
	D03	D03_32547015	32547015	C	A	5.23743e-07
	D03	D03_32549191	32549191	G	A	1.29602e-08
	D03	D03_32549391	32549391	T	G	5.00322e-08
	D03	D03_32557477	32557477	C	T	5.69309e-07
	D03	D03_32568727	32568727	A	G	3.16769e-07
	D03	D03_32568746	32568746	A	G	3.05722e-07
	D03	D03_32568855	32568855	G	A	8.67558e-07
	D03	D03_32570144	32570144	T	C	2.62151e-07
	D03	D03_32570540	32570540	G	A	1.61606e-08
	D03	D03_32581569	32581569	G	A	9.59499e-07
	D03	D03_32582235	32582235	G	A	1.88902e-07
	D03	D03_32583569	32583569	A	C	7.89766e-08
	D03	D03_32583748	32583748	C	T	1.72112e-08
	D03	D03_32585552	32585552	A	G	4.03471e-07
	D03	D03_32586255	32586255	T	A	7.04042e-07
	D03	D03_32586916	32586916	G	A	5.28965e-07
	D03	D03_32587043	32587043	C	T	2.70481e-07
	D03	D03_32587066	32587066	G	A	3.36371e-07
	D03	D03_32587215	32587215	C	T	7.95344e-07
	D03	D03_32587355	32587355	T	C	3.77876e-07
	D03	D03_32891947	32891947	C	T	3.94565e-08
	D03	D03_32892031	32892031	G	A	5.27096e-08
	D03	D03_32894719	32894719	A	G	1.50999e-07
	D03	D03_32894740	32894740	G	A	1.68692e-07
	D03	D03_32895604	32895604	C	A	1.3691e-07
	D03	D03_32895605	32895605	G	A	1.3691e-07
	D03	D03_32895717	32895717	C	T	1.78411e-07
	D03	D03_32895928	32895928	A	G	8.17129e-07
	D03	D03_38522475	38522475	A	G	6.75153e-07
	D03	D03_38848767	38848767	T	C	6.99434e-16
	D03	D03_38936917	38936917	A	G	1.07701e-10
	D03	D03_38938264	38938264	T	C	1.01835e-08
	D03	D03_38957276	38957276	A	G	5.19059e-11
	D03	D03_38987361	38987361	G	A	8.37058e-12
	D03	D03_39036788	39036788	A	G	3.50675e-11
	D03	D03_39059385	39059385	T	G	7.4204e-12
	D03	D03_39082094	39082094	T	C	2.67131e-15
	D03	D03_39132242	39132242	A	C	9.48227e-12
	D03	D03_39145574	39145574	A	G	3.17377e-08
	D03	D03_39302247	39302247	T	C	4.38234e-11
	D03	D03_39378324	39378324	A	G	1.41458e-11
	D03	D03_39459873	39459873	T	C	8.91723e-13
	D03	D03_39491480	39491480	A	G	9.28529e-12
	D03	D03_39497921	39497921	T	C	3.77431e-12
	D03	D03_39672998	39672998	T	C	2.01897e-14
	D03	D03_39887149	39887149	G	T	4.19083e-08
	D03	D03_39892732	39892732	T	C	2.36622e-12
	D03	D03_40054964	40054964	A	G	6.27833e-13
	D03	D03_40088035	40088035	A	G	3.27914e-14
	D03	D03_40259735	40259735	T	C	1.06973e-12
	D03	D03_40371129	40371129	A	G	1.43693e-13
	D03	D03_40545442	40545442	A	G	7.2406e-15
	D03	D03_40596197	40596197	A	C	2.79496e-09
	D03	D03_40697011	40697011	G	A	1.7278e-12
	D03	D03_40723801	40723801	A	T	2.02708e-10
	D03	D03_40979761	40979761	A	G	2.06643e-11
	D03	D03_40988063	40988063	A	G	6.66442e-11
	D03	D03_41096103	41096103	A	G	5.81426e-13
	D03	D03_41122803	41122803	T	C	2.37444e-11
	D03	D03_41573996	41573996	T	C	1.18437e-08
FD	D03	D03_8613832	8613832	A	G	2.38614e-09
	D03	D03_13178906	13178906	T	G	9.21469e-10
	D03	D03_13206050	13206050	T	C	8.85006e-10
	D03	D03_13830742	13830742	T	C	1.31074e-10
	D03	D03_14540855	14540855	A	C	2.64493e-10
	D03	D03_15720805	15720805	A	G	1.95706e-10
	D03	D03_17555741	17555741	A	G	1.16505e-09
	D03	D03_17711647	17711647	C	T	6.69173e-10
	D03	D03_20191660	20191660	A	G	5.87069e-07
	D03	D03_20799856	20799856	T	C	4.62299e-08
	D03	D03_21660681	21660681	A	G	1.0192e-07
	D03	D03_21726765	21726765	T	C	5.10944e-08
	D03	D03_22165517	22165517	A	G	5.26389e-08
	D03	D03_22198777	22198777	A	G	3.44066e-07
	D03	D03_22510782	22510782	T	G	6.66701e-07
	D03	D03_22532351	22532351	T	C	4.59999e-08
	D03	D03_22543728	22543728	T	C	5.48664e-07
	D03	D03_22805326	22805326	T	C	1.43772e-08
	D03	D03_23012304	23012304	A	G	1.12687e-07
	D03	D03_23200710	23200710	T	C	1.99873e-07
	D03	D03_23251964	23251964	G	C	1.50318e-08
	D03	D03_23325141	23325141	A	C	3.51959e-07
	D03	D03_23684703	23684703	A	G	1.11759e-07
	D03	D03_23722548	23722548	T	C	5.68694e-08
	D03	D03_24018525	24018525	T	C	7.00496e-08
	D03	D03_24093064	24093064	A	G	8.48033e-09
	D03	D03_24216876	24216876	A	G	7.67885e-09
	D03	D03_24578944	24578944	T	C	4.35537e-07
	D03	D03_25172608	25172608	A	T	1.40788e-08
	D03	D03_25175504	25175504	T	A	2.95431e-08
	D03	D03_25180213	25180213	T	C	1.89394e-08
	D03	D03_25295115	25295115	A	G	3.57813e-07
	D03	D03_25390169	25390169	T	C	2.26097e-07
	D03	D03_25826514	25826514	T	C	1.62145e-07
	D03	D03_25913701	25913701	C	T	2.49953e-08
	D03	D03_25990461	25990461	A	G	2.12641e-07
	D03	D03_26074803	26074803	C	A	2.58803e-08
	D03	D03_26185194	26185194	T	C	3.54038e-07
	D03	D03_26719099	26719099	A	G	2.28529e-10
	D03	D03_26881136	26881136	G	T	1.0362e-07
	D03	D03_26883673	26883673	A	G	5.39837e-08
	D03	D03_26893615	26893615	A	G	6.17432e-08
	D03	D03_26942729	26942729	T	C	2.34869e-07
	D03	D03_26946626	26946626	T	A	1.30686e-07
	D03	D03_27385938	27385938	T	G	3.56574e-08
	D03	D03_27512862	27512862	A	C	3.44875e-08
	D03	D03_27598866	27598866	T	G	1.60191e-08
	D03	D03_27761463	27761463	T	C	5.51483e-07
	D03	D03_27795629	27795629	T	G	3.5201e-08
	D03	D03_27949313	27949313	T	C	8.29544e-07
	D03	D03_27983634	27983634	A	G	1.70905e-07
	D03	D03_28233896	28233896	T	C	1.98198e-07
	D03	D03_28264676	28264676	A	G	8.42154e-08
	D03	D03_28264739	28264739	A	G	1.56272e-07
	D03	D03_28296945	28296945	T	G	4.01969e-08
	D03	D03_28447552	28447552	T	C	3.00876e-07
	D03	D03_28483216	28483216	T	C	3.13144e-08
	D03	D03_28600605	28600605	A	G	3.21999e-08
	D03	D03_28718239	28718239	T	C	2.41258e-09
	D03	D03_28837284	28837284	A	G	1.16259e-08
	D03	D03_28963368	28963368	T	A	3.43269e-08
	D03	D03_28983665	28983665	A	G	7.642e-07
	D03	D03_29075376	29075376	A	G	3.17733e-08
	D03	D03_29135681	29135681	A	G	7.10817e-07
	D03	D03_29198579	29198579	A	C	1.96753e-07
	D03	D03_29345291	29345291	A	G	3.85135e-08
	D03	D03_29887084	29887084	A	G	1.05251e-07
	D03	D03_29972984	29972984	C	T	3.28917e-08
	D03	D03_30049784	30049784	A	G	1.65827e-08
	D03	D03_30314810	30314810	A	C	1.42801e-08
	D03	D03_30397004	30397004	A	G	2.22189e-08
	D03	D03_30594966	30594966	T	C	3.7223e-07
	D03	D03_30764477	30764477	C	G	4.58773e-08
	D03	D03_30930568	30930568	C	T	3.63499e-08
	D03	D03_31003637	31003637	T	C	3.46087e-08
	D03	D03_31414516	31414516	T	C	8.95807e-07
	D03	D03_31600541	31600541	C	A	4.36452e-07
	D03	D03_31829672	31829672	T	C	5.71939e-07
	D03	D03_31862719	31862719	A	G	8.78178e-07
	D03	D03_31986933	31986933	A	C	2.64273e-08
	D03	D03_32102802	32102802	G	A	1.02162e-09
	D03	D03_32103904	32103904	C	T	1.51393e-09
	D03	D03_32104196	32104196	A	T	2.34609e-07
	D03	D03_32104312	32104312	T	C	1.02615e-09
	D03	D03_32104378	32104378	C	A	1.74164e-07
	D03	D03_32104902	32104902	C	G	2.28455e-09
	D03	D03_32108981	32108981	G	T	2.41346e-10
	D03	D03_32109172	32109172	G	T	1.73992e-07
	D03	D03_32117197	32117197	C	T	4.89603e-09
	D03	D03_32117779	32117779	C	T	6.46046e-10
	D03	D03_32117923	32117923	C	T	4.66821e-09
	D03	D03_32118131	32118131	C	T	7.97886e-10
	D03	D03_32118140	32118140	T	G	8.58e-10
	D03	D03_32118237	32118237	C	T	1.91013e-09
	D03	D03_32122807	32122807	G	A	1.15536e-09
	D03	D03_32124714	32124714	A	G	4.16834e-07
	D03	D03_32125779	32125779	A	C	1.95715e-09
	D03	D03_32126409	32126409	A	C	7.91398e-10
	D03	D03_32128364	32128364	G	A	8.34791e-10
	D03	D03_32128518	32128518	A	G	1.86415e-09
	D03	D03_32129777	32129777	C	T	9.70586e-10
	D03	D03_32129826	32129826	G	A	1.33965e-10
	D03	D03_32130143	32130143	G	A	5.32197e-10
	D03	D03_32130596	32130596	A	C	5.00297e-08
	D03	D03_32131495	32131495	C	T	9.81625e-10
	D03	D03_32131653	32131653	C	A	3.97827e-10
	D03	D03_32131739	32131739	T	C	2.01443e-09
	D03	D03_32133086	32133086	A	C	1.30083e-09
	D03	D03_32133196	32133196	C	A	1.57322e-09
	D03	D03_32133993	32133993	T	C	2.24135e-09
	D03	D03_32134697	32134697	C	T	9.44648e-10
	D03	D03_32134989	32134989	C	A	1.94302e-09
	D03	D03_32136602	32136602	T	C	2.03086e-10
	D03	D03_32136658	32136658	A	T	2.5119e-10
	D03	D03_32136701	32136701	A	G	2.68967e-08
	D03	D03_32136750	32136750	G	A	3.08135e-08
	D03	D03_32136773	32136773	T	C	2.40538e-08
	D03	D03_32138698	32138698	G	T	1.27207e-09
	D03	D03_32138841	32138841	A	G	9.37345e-09
	D03	D03_32138930	32138930	A	C	5.99748e-10
	D03	D03_32138975	32138975	C	T	2.20657e-09
	D03	D03_32139108	32139108	T	C	1.05965e-08
	D03	D03_32141503	32141503	T	A	1.11144e-09
	D03	D03_32141686	32141686	C	T	6.36763e-11
	D03	D03_32141830	32141830	A	G	1.08416e-08
	D03	D03_32141858	32141858	A	G	2.98135e-08
	D03	D03_32142035	32142035	G	A	1.74063e-09
	D03	D03_32142232	32142232	C	T	1.59484e-07
	D03	D03_32142663	32142663	A	G	1.95874e-12
	D03	D03_32144915	32144915	A	C	6.91111e-07
	D03	D03_32145238	32145238	C	T	4.00744e-10
	D03	D03_32145239	32145239	C	T	4.47338e-10
	D03	D03_32145270	32145270	A	C	2.67323e-10
	D03	D03_32145447	32145447	T	C	1.32999e-09
	D03	D03_32145526	32145526	G	A	1.15747e-09
	D03	D03_32145530	32145530	C	T	1.13201e-09
	D03	D03_32146073	32146073	C	T	5.6422e-09
	D03	D03_32146763	32146763	C	T	6.40538e-08
	D03	D03_32146941	32146941	C	T	1.79231e-09
	D03	D03_32148031	32148031	G	A	4.86151e-10
	D03	D03_32148049	32148049	A	G	2.94319e-10
	D03	D03_32148321	32148321	C	T	9.9784e-09
	D03	D03_32148484	32148484	T	C	1.67802e-09
	D03	D03_32148779	32148779	A	G	3.15801e-10
	D03	D03_32148837	32148837	G	A	1.71162e-09
	D03	D03_32148940	32148940	T	C	1.89628e-09
	D03	D03_32149055	32149055	T	A	1.04205e-09
	D03	D03_32150285	32150285	G	A	1.12139e-08
	D03	D03_32150394	32150394	T	C	2.6303e-08
	D03	D03_32150545	32150545	A	G	2.51643e-07
	D03	D03_32150703	32150703	C	T	1.63449e-09
	D03	D03_32163352	32163352	G	A	5.44967e-10
	D03	D03_32163712	32163712	C	T	4.62412e-11
	D03	D03_32163803	32163803	C	T	2.4091e-09
	D03	D03_32163918	32163918	C	A	3.44089e-09
	D03	D03_32164093	32164093	G	C	1.05146e-07
	D03	D03_32164129	32164129	A	G	7.0001e-09
	D03	D03_32164440	32164440	C	T	8.69608e-09
	D03	D03_32165017	32165017	A	T	2.67254e-10
	D03	D03_32166442	32166442	C	T	2.77615e-07
	D03	D03_32166847	32166847	T	C	3.17607e-08
	D03	D03_32166903	32166903	A	T	2.17661e-08
	D03	D03_32167241	32167241	G	A	8.09016e-10
	D03	D03_32169042	32169042	C	T	2.48486e-09
	D03	D03_32169077	32169077	C	G	3.08246e-09
	D03	D03_32169120	32169120	T	C	7.47062e-10
	D03	D03_32169157	32169157	C	T	7.33299e-10
	D03	D03_32169256	32169256	T	A	4.76903e-08
	D03	D03_32169514	32169514	C	G	1.16908e-09
	D03	D03_32169524	32169524	G	A	2.04909e-09
	D03	D03_32169723	32169723	C	T	1.18111e-09
	D03	D03_32169778	32169778	T	A	2.28248e-10
	D03	D03_32169877	32169877	C	T	4.76107e-09
	D03	D03_32173952	32173952	T	A	1.87491e-09
	D03	D03_32174149	32174149	G	T	6.17216e-09
	D03	D03_32174320	32174320	G	A	2.209e-10
	D03	D03_32174323	32174323	T	C	2.209e-10
	D03	D03_32174424	32174424	A	C	4.68396e-10
	D03	D03_32175007	32175007	G	A	4.03962e-08
	D03	D03_32175077	32175077	C	T	1.62884e-08
	D03	D03_32175100	32175100	C	T	1.82747e-08
	D03	D03_32176844	32176844	C	T	3.20708e-09
	D03	D03_32176853	32176853	A	G	2.72391e-09
	D03	D03_32177005	32177005	G	T	7.69377e-10
	D03	D03_32177916	32177916	C	T	3.14287e-10
	D03	D03_32178132	32178132	A	G	6.72222e-10
	D03	D03_32178157	32178157	C	T	6.02301e-10
	D03	D03_32178179	32178179	G	A	6.56857e-10
	D03	D03_32178384	32178384	C	T	4.05864e-10
	D03	D03_32178529	32178529	G	A	9.91159e-10
	D03	D03_32178551	32178551	G	T	3.53564e-10
	D03	D03_32178562	32178562	G	A	2.60424e-09
	D03	D03_32178597	32178597	A	C	1.24586e-10
	D03	D03_32178623	32178623	C	T	4.11325e-10
	D03	D03_32178740	32178740	A	G	5.19297e-08
	D03	D03_32178782	32178782	C	T	2.67473e-10
	D03	D03_32179000	32179000	G	A	1.22905e-08
	D03	D03_32179020	32179020	C	T	1.82923e-09
	D03	D03_32179082	32179082	G	A	1.4781e-09
	D03	D03_32179092	32179092	C	T	1.60124e-09
	D03	D03_32179168	32179168	G	A	3.73378e-10
	D03	D03_32179181	32179181	G	T	4.00958e-10
	D03	D03_32179460	32179460	C	T	2.73809e-10
	D03	D03_32179471	32179471	A	G	2.5055e-10
	D03	D03_32179540	32179540	G	A	1.60274e-09
	D03	D03_32179682	32179682	A	G	1.99328e-09
	D03	D03_32184057	32184057	T	G	7.62915e-08
	D03	D03_32184317	32184317	A	C	5.26259e-08
	D03	D03_32184351	32184351	G	A	1.84057e-09
	D03	D03_32184474	32184474	A	G	1.51411e-09
	D03	D03_32190534	32190534	G	A	1.50757e-09
	D03	D03_32191153	32191153	T	G	2.94489e-08
	D03	D03_32191569	32191569	A	G	1.62496e-08
	D03	D03_32193825	32193825	G	A	9.92678e-09
	D03	D03_32194060	32194060	G	T	3.0197e-08
	D03	D03_32196278	32196278	T	A	1.39222e-09
	D03	D03_32196312	32196312	A	G	2.83025e-08
	D03	D03_32196342	32196342	C	T	9.42269e-10
	D03	D03_32196458	32196458	G	A	1.25184e-09
	D03	D03_32196494	32196494	T	G	6.54347e-10
	D03	D03_32196786	32196786	G	A	9.25464e-10
	D03	D03_32196936	32196936	T	C	1.26128e-08
	D03	D03_32197051	32197051	G	A	8.31885e-10
	D03	D03_32197139	32197139	C	T	2.43583e-09
	D03	D03_32197275	32197275	T	C	1.85858e-09
	D03	D03_32197372	32197372	C	G	1.02684e-09
	D03	D03_32197421	32197421	G	T	3.22105e-10
	D03	D03_32198071	32198071	A	G	1.41864e-08
	D03	D03_32198207	32198207	T	C	1.52287e-08
	D03	D03_32198679	32198679	G	A	3.44535e-09
	D03	D03_32198710	32198710	C	T	1.87453e-09
	D03	D03_32198713	32198713	T	C	1.97868e-09
	D03	D03_32199414	32199414	G	A	2.8916e-08
	D03	D03_32199513	32199513	G	A	7.51879e-10
	D03	D03_32199737	32199737	C	G	9.45519e-09
	D03	D03_32199932	32199932	A	C	6.81518e-07
	D03	D03_32199933	32199933	C	A	8.03843e-07
	D03	D03_32200012	32200012	C	G	7.08778e-11
	D03	D03_32200147	32200147	T	C	5.93344e-10
	D03	D03_32200163	32200163	T	C	4.00206e-10
	D03	D03_32200362	32200362	G	C	2.6089e-10
	D03	D03_32200364	32200364	T	A	2.40482e-10
	D03	D03_32200414	32200414	A	G	1.02515e-08
	D03	D03_32200432	32200432	A	T	1.0364e-08
	D03	D03_32200536	32200536	T	C	1.20114e-08
	D03	D03_32200718	32200718	T	C	2.79371e-10
	D03	D03_32200970	32200970	T	C	8.07446e-08
	D03	D03_32201142	32201142	C	T	5.90598e-09
	D03	D03_32201283	32201283	G	A	9.10524e-09
	D03	D03_32201343	32201343	A	G	6.50637e-10
	D03	D03_32201355	32201355	A	G	7.3267e-10
	D03	D03_32201481	32201481	C	A	4.61637e-08
	D03	D03_32201583	32201583	G	A	1.25422e-09
	D03	D03_32201593	32201593	T	C	1.40301e-09
	D03	D03_32201662	32201662	A	G	2.93438e-09
	D03	D03_32202129	32202129	G	C	2.28314e-10
	D03	D03_32202138	32202138	A	C	1.91055e-10
	D03	D03_32202181	32202181	T	C	1.79827e-10
	D03	D03_32202253	32202253	C	A	8.53333e-10
	D03	D03_32202337	32202337	G	A	2.83056e-10
	D03	D03_32202349	32202349	G	A	3.65356e-11
	D03	D03_32202386	32202386	A	G	1.16879e-10
	D03	D03_32202878	32202878	T	A	1.16542e-08
	D03	D03_32202880	32202880	C	T	1.0522e-08
	D03	D03_32202896	32202896	G	A	5.40926e-08
	D03	D03_32202908	32202908	A	G	4.89103e-08
	D03	D03_32208096	32208096	A	T	1.35941e-09
	D03	D03_32208329	32208329	C	T	1.83923e-09
	D03	D03_32210287	32210287	C	T	8.84183e-10
	D03	D03_32210346	32210346	C	T	1.66381e-09
	D03	D03_32211043	32211043	T	C	3.16506e-07
	D03	D03_32211708	32211708	T	C	9.99281e-10
	D03	D03_32211833	32211833	A	G	9.77443e-09
	D03	D03_32211892	32211892	G	T	9.38774e-09
	D03	D03_32212043	32212043	G	A	2.63966e-07
	D03	D03_32212279	32212279	G	A	1.20193e-07
	D03	D03_32212428	32212428	T	C	4.69102e-10
	D03	D03_32212487	32212487	G	A	1.00347e-08
	D03	D03_32212605	32212605	G	A	1.92221e-09
	D03	D03_32212750	32212750	T	C	1.43444e-10
	D03	D03_32212861	32212861	G	A	2.38626e-09
	D03	D03_32213063	32213063	A	C	1.58158e-09
	D03	D03_32213209	32213209	A	G	8.67713e-10
	D03	D03_32213277	32213277	G	A	1.31224e-10
	D03	D03_32213342	32213342	T	C	7.85915e-10
	D03	D03_32213498	32213498	G	C	1.46516e-08
	D03	D03_32213586	32213586	T	A	4.50953e-10
	D03	D03_32213628	32213628	A	G	4.32953e-10
	D03	D03_32213870	32213870	A	G	6.32059e-09
	D03	D03_32213904	32213904	G	A	2.62224e-08
	D03	D03_32213910	32213910	A	G	2.61581e-08
	D03	D03_32214769	32214769	C	T	1.14079e-09
	D03	D03_32214958	32214958	T	A	3.02272e-10
	D03	D03_32215179	32215179	A	C	8.61475e-09
	D03	D03_32215180	32215180	C	T	7.93084e-09
	D03	D03_32215931	32215931	A	T	4.3465e-09
	D03	D03_32216116	32216116	G	A	1.17452e-08
	D03	D03_32220875	32220875	C	T	2.77954e-08
	D03	D03_32221170	32221170	T	C	1.24203e-09
	D03	D03_32221177	32221177	C	G	1.03656e-08
	D03	D03_32221255	32221255	A	C	5.63371e-08
	D03	D03_32222097	32222097	A	G	1.78245e-08
	D03	D03_32223837	32223837	G	A	2.37111e-11
	D03	D03_32223979	32223979	G	C	9.36263e-10
	D03	D03_32224181	32224181	C	T	9.10866e-09
	D03	D03_32224221	32224221	T	C	7.19457e-09
	D03	D03_32224228	32224228	A	G	7.04217e-09
	D03	D03_32224261	32224261	A	C	7.72783e-09
	D03	D03_32224278	32224278	G	A	7.71414e-09
	D03	D03_32224561	32224561	C	T	6.09801e-08
	D03	D03_32224667	32224667	T	A	4.03508e-07
	D03	D03_32224751	32224751	G	C	6.42423e-08
	D03	D03_32224806	32224806	A	G	1.51104e-08
	D03	D03_32225079	32225079	G	C	1.72418e-09
	D03	D03_32225162	32225162	A	T	2.96667e-10
	D03	D03_32225173	32225173	T	C	3.73701e-10
	D03	D03_32225217	32225217	G	T	1.32878e-08
	D03	D03_32225245	32225245	G	A	2.04232e-09
	D03	D03_32225261	32225261	C	T	2.66574e-09
	D03	D03_32225277	32225277	T	A	2.63433e-09
	D03	D03_32225407	32225407	G	A	2.21281e-09
	D03	D03_32225422	32225422	G	A	2.44013e-09
	D03	D03_32225478	32225478	A	G	1.596e-09
	D03	D03_32225575	32225575	T	C	1.763e-09
	D03	D03_32225604	32225604	T	C	1.02409e-08
	D03	D03_32225776	32225776	T	A	5.11745e-10
	D03	D03_32225812	32225812	T	C	5.48502e-10
	D03	D03_32225907	32225907	G	A	1.53078e-07
	D03	D03_32226003	32226003	C	T	7.71182e-09
	D03	D03_32226095	32226095	C	A	7.86414e-09
	D03	D03_32226299	32226299	G	A	2.73431e-09
	D03	D03_32226339	32226339	C	T	4.33065e-10
	D03	D03_32226356	32226356	A	G	4.72187e-10
	D03	D03_32226459	32226459	G	A	1.46933e-08
	D03	D03_32226574	32226574	G	T	1.0992e-09
	D03	D03_32226631	32226631	T	C	1.8392e-09
	D03	D03_32226673	32226673	G	A	2.01508e-08
	D03	D03_32226979	32226979	A	G	1.74562e-08
	D03	D03_32227010	32227010	C	T	2.01651e-08
	D03	D03_32227041	32227041	A	C	1.70947e-08
	D03	D03_32227260	32227260	A	G	3.93537e-10
	D03	D03_32227299	32227299	A	G	3.93291e-10
	D03	D03_32227307	32227307	T	C	2.52096e-10
	D03	D03_32227322	32227322	G	A	2.48846e-10
	D03	D03_32227340	32227340	A	G	2.37971e-10
	D03	D03_32227386	32227386	C	T	6.86097e-10
	D03	D03_32227464	32227464	T	C	2.31161e-10
	D03	D03_32227602	32227602	T	C	1.98164e-09
	D03	D03_32227656	32227656	G	A	1.57748e-09
	D03	D03_32227945	32227945	G	A	1.7044e-10
	D03	D03_32228263	32228263	C	T	6.57175e-09
	D03	D03_32228964	32228964	T	G	4.92492e-08
	D03	D03_32229045	32229045	A	G	1.30644e-10
	D03	D03_32229101	32229101	C	T	9.2254e-08
	D03	D03_32230515	32230515	T	C	3.57693e-10
	D03	D03_32230787	32230787	A	G	1.84858e-09
	D03	D03_32230792	32230792	A	G	1.81886e-09
	D03	D03_32231211	32231211	A	G	1.12477e-08
	D03	D03_32231294	32231294	G	A	4.66089e-09
	D03	D03_32231888	32231888	G	C	7.61944e-10
	D03	D03_32233003	32233003	G	A	1.16429e-09
	D03	D03_32233064	32233064	C	T	4.25492e-07
	D03	D03_32233096	32233096	A	G	2.31725e-09
	D03	D03_32233143	32233143	G	T	2.23319e-09
	D03	D03_32233229	32233229	T	A	7.67295e-08
	D03	D03_32234012	32234012	C	A	6.03652e-09
	D03	D03_32234345	32234345	A	C	1.72669e-08
	D03	D03_32234412	32234412	C	A	2.14487e-08
	D03	D03_32234431	32234431	C	T	5.32527e-10
	D03	D03_32234715	32234715	A	C	1.03069e-09
	D03	D03_32234784	32234784	C	T	1.86417e-09
	D03	D03_32234857	32234857	C	A	7.77916e-09
	D03	D03_32234962	32234962	G	A	5.90578e-09
	D03	D03_32234987	32234987	A	C	7.30752e-09
	D03	D03_32234999	32234999	C	T	6.8917e-09
	D03	D03_32235009	32235009	T	A	8.26903e-09
	D03	D03_32235078	32235078	G	A	9.71854e-09
	D03	D03_32235752	32235752	C	T	9.84096e-09
	D03	D03_32235962	32235962	G	T	8.76212e-10
	D03	D03_32235995	32235995	C	T	1.07137e-09
	D03	D03_32236150	32236150	T	C	1.19653e-07
	D03	D03_32236174	32236174	G	A	1.56461e-09
	D03	D03_32236331	32236331	C	T	1.00409e-09
	D03	D03_32236345	32236345	T	C	4.59655e-09
	D03	D03_32236538	32236538	G	A	4.48373e-10
	D03	D03_32236606	32236606	A	G	6.90425e-09
	D03	D03_32236811	32236811	C	T	1.10236e-09
	D03	D03_32237030	32237030	A	G	9.44333e-09
	D03	D03_32237178	32237178	G	A	6.31044e-08
	D03	D03_32237259	32237259	C	T	2.73118e-10
	D03	D03_32238138	32238138	G	C	4.40356e-09
	D03	D03_32238145	32238145	C	T	4.40356e-09
	D03	D03_32238281	32238281	T	G	4.01276e-11
	D03	D03_32238380	32238380	A	C	3.34642e-09
	D03	D03_32239592	32239592	A	G	4.04232e-07
	D03	D03_32240290	32240290	T	G	1.14401e-08
	D03	D03_32240443	32240443	T	C	5.5551e-10
	D03	D03_32240897	32240897	T	G	3.99253e-10
	D03	D03_32241038	32241038	C	A	4.55831e-10
	D03	D03_32241063	32241063	G	A	2.62981e-09
	D03	D03_32241081	32241081	C	T	3.46792e-10
	D03	D03_32241138	32241138	G	A	9.26834e-10
	D03	D03_32241802	32241802	C	A	1.31834e-11
	D03	D03_32242000	32242000	C	G	5.78735e-10
	D03	D03_32242945	32242945	T	C	4.50495e-10
	D03	D03_32243024	32243024	A	G	8.81416e-10
	D03	D03_32243026	32243026	C	T	8.95464e-10
	D03	D03_32244084	32244084	G	T	9.73974e-11
	D03	D03_32244198	32244198	G	T	4.30886e-08
	D03	D03_32244399	32244399	A	G	1.02225e-09
	D03	D03_32244442	32244442	G	A	8.29308e-10
	D03	D03_32244476	32244476	G	C	9.03466e-10
	D03	D03_32244792	32244792	A	G	6.63427e-08
	D03	D03_32244837	32244837	C	T	1.08844e-08
	D03	D03_32244966	32244966	T	A	1.40067e-08
	D03	D03_32245829	32245829	C	A	9.10391e-09
	D03	D03_32245958	32245958	C	T	1.07423e-08
	D03	D03_32245995	32245995	G	A	8.01125e-09
	D03	D03_32246157	32246157	T	A	1.66338e-09
	D03	D03_32246348	32246348	A	G	1.4918e-09
	D03	D03_32246460	32246460	G	A	3.43263e-10
	D03	D03_32246487	32246487	C	T	5.15203e-09
	D03	D03_32246627	32246627	T	C	2.4847e-09
	D03	D03_32246678	32246678	T	C	1.13858e-09
	D03	D03_32246700	32246700	G	A	6.83116e-09
	D03	D03_32246723	32246723	G	A	1.24235e-09
	D03	D03_32247031	32247031	C	T	5.23118e-10
	D03	D03_32247155	32247155	G	A	3.08354e-10
	D03	D03_32247392	32247392	G	A	2.26183e-09
	D03	D03_32247410	32247410	G	A	1.50375e-09
	D03	D03_32247437	32247437	G	C	1.20317e-09
	D03	D03_32247543	32247543	G	C	4.01787e-10
	D03	D03_32247675	32247675	A	G	2.83591e-09
	D03	D03_32248052	32248052	A	G	3.31877e-10
	D03	D03_32248091	32248091	G	A	2.74143e-10
	D03	D03_32248111	32248111	G	A	2.98124e-10
	D03	D03_32248184	32248184	A	T	2.16561e-10
	D03	D03_32248408	32248408	A	C	1.25892e-09
	D03	D03_32248470	32248470	G	A	1.50875e-09
	D03	D03_32248471	32248471	G	A	1.50875e-09
	D03	D03_32248683	32248683	G	T	2.05226e-09
	D03	D03_32248783	32248783	C	T	2.26337e-10
	D03	D03_32248911	32248911	C	T	1.1676e-08
	D03	D03_32250414	32250414	G	A	5.30563e-11
	D03	D03_32250873	32250873	G	T	2.85253e-09
	D03	D03_32251022	32251022	T	C	1.08733e-08
	D03	D03_32251130	32251130	A	G	1.97866e-08
	D03	D03_32251212	32251212	G	A	5.66936e-10
	D03	D03_32251957	32251957	T	C	9.56953e-09
	D03	D03_32252030	32252030	G	A	3.53199e-10
	D03	D03_32254178	32254178	G	T	2.84426e-09
	D03	D03_32254785	32254785	G	A	2.21399e-07
	D03	D03_32255194	32255194	C	T	3.96425e-10
	D03	D03_32255202	32255202	G	A	3.96425e-10
	D03	D03_32256508	32256508	T	C	2.16269e-10
	D03	D03_32256604	32256604	C	T	1.28109e-07
	D03	D03_32256797	32256797	A	G	1.06048e-08
	D03	D03_32256858	32256858	C	T	8.03236e-08
	D03	D03_32257205	32257205	A	G	4.2376e-10
	D03	D03_32257249	32257249	T	C	1.30676e-08
	D03	D03_32257259	32257259	C	T	1.17199e-09
	D03	D03_32257605	32257605	G	A	7.00864e-10
	D03	D03_32257782	32257782	G	A	1.99808e-09
	D03	D03_32258427	32258427	G	T	1.51357e-09
	D03	D03_32258456	32258456	A	T	1.94279e-09
	D03	D03_32258509	32258509	A	G	1.02263e-08
	D03	D03_32258633	32258633	C	T	2.43351e-09
	D03	D03_32258680	32258680	G	A	7.75192e-09
	D03	D03_32258851	32258851	C	T	4.48114e-09
	D03	D03_32258973	32258973	G	C	1.57057e-07
	D03	D03_32259067	32259067	A	G	7.7956e-09
	D03	D03_32259085	32259085	C	G	3.99934e-08
	D03	D03_32259235	32259235	T	C	1.02406e-09
	D03	D03_32259524	32259524	G	A	8.82417e-07
	D03	D03_32259578	32259578	T	C	9.27216e-08
	D03	D03_32259622	32259622	G	T	2.39615e-09
	D03	D03_32260282	32260282	C	A	3.14031e-09
	D03	D03_32260315	32260315	C	A	1.52256e-09
	D03	D03_32260371	32260371	A	G	9.60289e-09
	D03	D03_32260597	32260597	A	G	1.65519e-08
	D03	D03_32260688	32260688	C	T	2.40828e-07
	D03	D03_32260775	32260775	G	T	7.306e-09
	D03	D03_32260803	32260803	C	G	1.61191e-09
	D03	D03_32260960	32260960	G	A	1.51025e-09
	D03	D03_32261178	32261178	A	T	2.00001e-10
	D03	D03_32261180	32261180	T	C	2.30977e-10
	D03	D03_32261230	32261230	A	C	2.42698e-09
	D03	D03_32261420	32261420	G	A	5.6335e-10
	D03	D03_32262168	32262168	G	C	2.96557e-10
	D03	D03_32262519	32262519	C	A	1.58578e-09
	D03	D03_32262520	32262520	C	T	1.58578e-09
	D03	D03_32262836	32262836	C	T	7.90814e-10
	D03	D03_32263115	32263115	T	G	1.56033e-08
	D03	D03_32263133	32263133	C	T	1.5837e-08
	D03	D03_32263135	32263135	T	C	1.5837e-08
	D03	D03_32263299	32263299	C	A	1.35755e-09
	D03	D03_32263339	32263339	T	G	3.58536e-10
	D03	D03_32263354	32263354	A	G	3.75473e-10
	D03	D03_32264275	32264275	T	A	1.12852e-08
	D03	D03_32264467	32264467	T	A	8.25501e-08
	D03	D03_32264725	32264725	A	G	1.13872e-07
	D03	D03_32264848	32264848	A	G	1.85901e-08
	D03	D03_32265207	32265207	G	C	2.56915e-08
	D03	D03_32265352	32265352	A	G	2.70568e-10
	D03	D03_32266094	32266094	A	G	1.45308e-10
	D03	D03_32266153	32266153	T	C	4.3759e-10
	D03	D03_32266166	32266166	C	T	4.3104e-10
	D03	D03_32266233	32266233	T	C	4.08527e-10
	D03	D03_32266891	32266891	A	G	1.43275e-08
	D03	D03_32266901	32266901	C	T	1.69929e-08
	D03	D03_32267167	32267167	A	G	1.30687e-10
	D03	D03_32267394	32267394	G	A	9.29144e-11
	D03	D03_32267481	32267481	G	A	9.16629e-09
	D03	D03_32267559	32267559	G	A	1.02662e-09
	D03	D03_32268043	32268043	C	T	3.77437e-10
	D03	D03_32268044	32268044	G	A	3.18256e-10
	D03	D03_32268190	32268190	T	C	2.36789e-09
	D03	D03_32270019	32270019	G	A	3.98677e-09
	D03	D03_32270276	32270276	A	G	1.81373e-10
	D03	D03_32270849	32270849	G	T	1.831e-10
	D03	D03_32273965	32273965	G	A	2.08963e-09
	D03	D03_32274097	32274097	A	G	6.38124e-09
	D03	D03_32275181	32275181	T	C	3.19838e-08
	D03	D03_32280099	32280099	T	C	5.18932e-08
	D03	D03_32280190	32280190	G	A	5.75925e-09
	D03	D03_32280191	32280191	G	T	5.75925e-09
	D03	D03_32280220	32280220	G	A	2.46255e-08
	D03	D03_32280231	32280231	G	T	6.51652e-09
	D03	D03_32280240	32280240	G	A	6.67686e-09
	D03	D03_32280329	32280329	G	T	3.97734e-09
	D03	D03_32280342	32280342	T	C	6.36528e-09
	D03	D03_32280370	32280370	A	G	2.14626e-09
	D03	D03_32280387	32280387	C	T	1.24886e-09
	D03	D03_32280467	32280467	T	C	1.46443e-09
	D03	D03_32280491	32280491	G	A	1.65788e-09
	D03	D03_32280640	32280640	T	G	4.66885e-09
	D03	D03_32280759	32280759	C	T	5.36529e-09
	D03	D03_32280799	32280799	T	G	4.24067e-09
	D03	D03_32281234	32281234	G	A	4.68502e-10
	D03	D03_32281260	32281260	C	T	5.24345e-10
	D03	D03_32281528	32281528	C	T	1.2521e-08
	D03	D03_32281544	32281544	G	T	1.1171e-08
	D03	D03_32281717	32281717	T	C	1.53976e-07
	D03	D03_32281966	32281966	G	T	4.60615e-08
	D03	D03_32281968	32281968	C	T	4.60615e-08
	D03	D03_32281999	32281999	C	T	8.82993e-09
	D03	D03_32282076	32282076	A	G	1.12576e-08
	D03	D03_32282487	32282487	A	T	1.81628e-09
	D03	D03_32282681	32282681	C	T	1.17955e-09
	D03	D03_32283091	32283091	C	T	7.2959e-09
	D03	D03_32283106	32283106	T	A	8.37425e-09
	D03	D03_32283157	32283157	T	C	3.38511e-10
	D03	D03_32283195	32283195	G	A	3.25238e-10
	D03	D03_32283207	32283207	G	A	3.08522e-10
	D03	D03_32283444	32283444	A	C	5.50031e-09
	D03	D03_32283742	32283742	A	G	4.76718e-08
	D03	D03_32285466	32285466	C	T	9.67674e-09
	D03	D03_32285818	32285818	G	A	1.77658e-08
	D03	D03_32286688	32286688	A	T	4.09686e-10
	D03	D03_32287050	32287050	T	A	1.00787e-09
	D03	D03_32287374	32287374	A	G	4.11714e-07
	D03	D03_32287546	32287546	C	T	4.09747e-08
	D03	D03_32291690	32291690	A	G	2.27607e-07
	D03	D03_32291758	32291758	A	G	2.72572e-07
	D03	D03_32293989	32293989	C	T	3.21872e-10
	D03	D03_32294063	32294063	G	A	2.77491e-08
	D03	D03_32294979	32294979	G	A	1.27242e-07
	D03	D03_32295110	32295110	T	C	1.94904e-09
	D03	D03_32295152	32295152	C	T	6.30626e-10
	D03	D03_32295729	32295729	T	G	8.25198e-10
	D03	D03_32295759	32295759	G	C	1.24838e-08
	D03	D03_32295896	32295896	G	A	2.83467e-10
	D03	D03_32296021	32296021	A	G	3.10491e-10
	D03	D03_32296152	32296152	A	T	3.78411e-10
	D03	D03_32298277	32298277	G	A	2.35595e-09
	D03	D03_32303171	32303171	C	T	4.40414e-10
	D03	D03_32307152	32307152	C	A	4.13939e-09
	D03	D03_32307223	32307223	C	T	1.9041e-09
	D03	D03_32307278	32307278	C	T	4.6201e-11
	D03	D03_32310877	32310877	G	T	5.33344e-10
	D03	D03_32318930	32318930	C	T	2.66884e-09
	D03	D03_32318961	32318961	T	C	2.51888e-09
	D03	D03_32320636	32320636	C	T	1.74807e-08
	D03	D03_32320997	32320997	A	G	1.70216e-08
	D03	D03_32323889	32323889	G	A	1.63801e-08
	D03	D03_32323932	32323932	G	T	4.71394e-07
	D03	D03_32330013	32330013	C	A	1.85021e-09
	D03	D03_32330283	32330283	T	C	1.35052e-08
	D03	D03_32330285	32330285	A	G	1.35052e-08
	D03	D03_32331881	32331881	A	G	1.99877e-09
	D03	D03_32331888	32331888	T	A	1.99877e-09
	D03	D03_32332276	32332276	C	A	5.2815e-08
	D03	D03_32332693	32332693	G	A	4.19903e-10
	D03	D03_32332735	32332735	G	T	5.79844e-10
	D03	D03_32332854	32332854	G	A	9.5269e-07
	D03	D03_32333034	32333034	A	G	1.92629e-09
	D03	D03_32333701	32333701	T	A	3.95375e-08
	D03	D03_32333857	32333857	G	A	8.05866e-09
	D03	D03_32336089	32336089	G	T	4.54981e-09
	D03	D03_32337265	32337265	T	A	3.27584e-07
	D03	D03_32337943	32337943	A	G	1.38618e-08
	D03	D03_32338192	32338192	C	T	4.24069e-07
	D03	D03_32338598	32338598	T	C	1.13954e-09
	D03	D03_32338623	32338623	T	G	8.47081e-10
	D03	D03_32346527	32346527	C	T	8.69215e-10
	D03	D03_32346550	32346550	C	T	1.35158e-09
	D03	D03_32346998	32346998	T	C	3.27123e-08
	D03	D03_32347829	32347829	C	T	4.5144e-08
	D03	D03_32347854	32347854	T	C	1.0977e-08
	D03	D03_32347886	32347886	G	C	1.24776e-08
	D03	D03_32347917	32347917	C	A	1.32173e-08
	D03	D03_32348757	32348757	C	T	2.60006e-10
	D03	D03_32348827	32348827	A	C	1.17742e-09
	D03	D03_32353239	32353239	C	T	1.23056e-07
	D03	D03_32353294	32353294	A	G	2.82633e-09
	D03	D03_32353650	32353650	A	G	1.75161e-08
	D03	D03_32353654	32353654	C	T	1.84591e-08
	D03	D03_32353666	32353666	G	T	1.84591e-08
	D03	D03_32353957	32353957	A	T	1.69667e-08
	D03	D03_32354080	32354080	G	A	1.79537e-08
	D03	D03_32354534	32354534	G	A	2.76191e-09
	D03	D03_32357800	32357800	T	C	5.95032e-10
	D03	D03_32357966	32357966	A	G	4.34948e-10
	D03	D03_32361086	32361086	C	T	2.76728e-09
	D03	D03_32361341	32361341	C	T	4.41877e-10
	D03	D03_32363936	32363936	T	C	1.71757e-07
	D03	D03_32364028	32364028	C	T	5.14637e-08
	D03	D03_32364131	32364131	A	C	1.37364e-08
	D03	D03_32364150	32364150	G	A	7.55332e-11
	D03	D03_32368844	32368844	G	A	3.08499e-09
	D03	D03_32370629	32370629	A	G	1.76265e-09
	D03	D03_32370639	32370639	A	T	1.8529e-09
	D03	D03_32371228	32371228	A	G	8.44649e-10
	D03	D03_32371253	32371253	A	G	8.12225e-10
	D03	D03_32372046	32372046	T	C	1.11285e-07
	D03	D03_32372531	32372531	C	T	2.16971e-08
	D03	D03_32373040	32373040	C	T	3.76552e-07
	D03	D03_32373095	32373095	C	A	3.50604e-07
	D03	D03_32373739	32373739	G	A	2.52458e-09
	D03	D03_32374011	32374011	A	G	2.24554e-09
	D03	D03_32374085	32374085	A	C	3.99372e-10
	D03	D03_32374118	32374118	G	A	1.48432e-09
	D03	D03_32374153	32374153	T	C	7.19774e-09
	D03	D03_32374382	32374382	C	A	4.64735e-10
	D03	D03_32374393	32374393	C	T	3.32303e-10
	D03	D03_32374674	32374674	T	C	4.71639e-09
	D03	D03_32374698	32374698	G	A	9.65428e-09
	D03	D03_32374761	32374761	G	T	5.28248e-09
	D03	D03_32374771	32374771	T	C	5.28248e-09
	D03	D03_32375367	32375367	A	G	1.09351e-07
	D03	D03_32375505	32375505	C	G	2.19695e-09
	D03	D03_32379264	32379264	G	A	3.68547e-09
	D03	D03_32383993	32383993	G	A	1.06201e-08
	D03	D03_32383997	32383997	C	T	1.50823e-09
	D03	D03_32384387	32384387	G	A	1.06516e-08
	D03	D03_32384536	32384536	T	C	2.70222e-09
	D03	D03_32384703	32384703	T	C	1.11109e-08
	D03	D03_32384715	32384715	A	G	1.11109e-08
	D03	D03_32384756	32384756	A	G	3.9043e-08
	D03	D03_32385302	32385302	G	A	8.58657e-10
	D03	D03_32385323	32385323	T	C	9.25254e-10
	D03	D03_32385372	32385372	C	A	6.5376e-10
	D03	D03_32385389	32385389	G	A	6.19377e-10
	D03	D03_32385392	32385392	T	G	6.19377e-10
	D03	D03_32385807	32385807	C	G	2.48409e-09
	D03	D03_32386454	32386454	T	C	8.64721e-08
	D03	D03_32386534	32386534	A	G	3.04353e-08
	D03	D03_32389885	32389885	T	C	2.93589e-09
	D03	D03_32390213	32390213	C	T	1.78758e-08
	D03	D03_32390341	32390341	C	T	9.59677e-08
	D03	D03_32391869	32391869	A	G	7.25101e-08
	D03	D03_32391952	32391952	A	G	3.84543e-07
	D03	D03_32392149	32392149	G	A	1.17946e-08
	D03	D03_32392503	32392503	A	G	2.70222e-07
	D03	D03_32392771	32392771	G	A	1.39863e-09
	D03	D03_32393358	32393358	G	A	7.88035e-10
	D03	D03_32393602	32393602	C	T	2.23205e-09
	D03	D03_32396852	32396852	T	C	4.52124e-09
	D03	D03_32399484	32399484	A	T	6.53343e-08
	D03	D03_32402623	32402623	G	C	2.64421e-10
	D03	D03_32403061	32403061	G	A	1.314e-09
	D03	D03_32403165	32403165	A	C	1.09649e-08
	D03	D03_32404566	32404566	A	G	1.91222e-10
	D03	D03_32404722	32404722	C	A	7.31035e-10
	D03	D03_32405041	32405041	C	T	3.30999e-10
	D03	D03_32405339	32405339	T	A	1.4239e-09
	D03	D03_32406003	32406003	A	G	9.5596e-09
	D03	D03_32406054	32406054	T	A	1.36914e-09
	D03	D03_32406126	32406126	T	C	2.53824e-09
	D03	D03_32406356	32406356	G	A	3.93898e-08
	D03	D03_32406368	32406368	G	C	4.82932e-08
	D03	D03_32406959	32406959	T	C	3.11576e-08
	D03	D03_32408532	32408532	G	A	2.5119e-10
	D03	D03_32408655	32408655	T	C	1.73277e-09
	D03	D03_32408668	32408668	G	C	6.55146e-08
	D03	D03_32408769	32408769	C	A	1.28995e-09
	D03	D03_32408811	32408811	C	T	2.12036e-09
	D03	D03_32409133	32409133	A	G	2.81178e-09
	D03	D03_32410764	32410764	G	T	2.45633e-08
	D03	D03_32410822	32410822	C	A	4.45222e-09
	D03	D03_32411770	32411770	A	G	1.47989e-08
	D03	D03_32411830	32411830	G	A	1.483e-08
	D03	D03_32415550	32415550	C	A	2.35761e-09
	D03	D03_32415758	32415758	A	G	6.92293e-09
	D03	D03_32415815	32415815	T	C	2.71037e-09
	D03	D03_32416422	32416422	T	C	1.49804e-09
	D03	D03_32416521	32416521	C	T	2.96867e-09
	D03	D03_32416802	32416802	T	C	2.2869e-08
	D03	D03_32417289	32417289	A	G	1.49343e-08
	D03	D03_32417381	32417381	C	T	1.77625e-09
	D03	D03_32417601	32417601	C	T	4.76457e-10
	D03	D03_32417653	32417653	A	G	6.63169e-10
	D03	D03_32417654	32417654	C	T	6.63169e-10
	D03	D03_32417737	32417737	C	T	3.9418e-08
	D03	D03_32417841	32417841	C	T	6.92754e-09
	D03	D03_32418040	32418040	G	C	3.19474e-10
	D03	D03_32418086	32418086	A	G	1.03762e-09
	D03	D03_32418103	32418103	C	T	1.60182e-09
	D03	D03_32418150	32418150	A	G	1.24338e-09
	D03	D03_32418184	32418184	T	G	1.28658e-09
	D03	D03_32432039	32432039	A	G	1.59341e-08
	D03	D03_32432042	32432042	A	C	1.59341e-08
	D03	D03_32432084	32432084	C	T	6.32258e-09
	D03	D03_32432173	32432173	G	A	3.6446e-09
	D03	D03_32432470	32432470	C	T	1.45727e-09
	D03	D03_32432541	32432541	A	G	1.99047e-09
	D03	D03_32432543	32432543	T	C	1.59732e-09
	D03	D03_32432592	32432592	C	A	2.32658e-08
	D03	D03_32432682	32432682	G	C	1.30511e-08
	D03	D03_32432686	32432686	T	C	1.29502e-08
	D03	D03_32433152	32433152	T	A	4.56761e-10
	D03	D03_32433176	32433176	A	C	4.35935e-10
	D03	D03_32433301	32433301	T	C	9.00219e-09
	D03	D03_32433331	32433331	C	T	2.52977e-09
	D03	D03_32435031	32435031	G	T	5.2311e-07
	D03	D03_32435275	32435275	T	G	2.0115e-09
	D03	D03_32435371	32435371	A	G	1.40772e-09
	D03	D03_32435404	32435404	C	T	8.2299e-11
	D03	D03_32435780	32435780	T	G	5.80238e-10
	D03	D03_32435898	32435898	C	T	2.12031e-08
	D03	D03_32436119	32436119	C	T	1.05331e-09
	D03	D03_32436194	32436194	T	C	3.4679e-10
	D03	D03_32436207	32436207	G	A	3.63758e-10
	D03	D03_32436380	32436380	T	C	8.58006e-10
	D03	D03_32436611	32436611	G	A	1.77147e-09
	D03	D03_32436654	32436654	C	T	1.34821e-09
	D03	D03_32436862	32436862	G	A	1.37293e-10
	D03	D03_32436876	32436876	C	T	3.00049e-10
	D03	D03_32436898	32436898	T	C	1.09413e-10
	D03	D03_32437119	32437119	A	C	1.70069e-09
	D03	D03_32437194	32437194	C	T	5.23915e-10
	D03	D03_32437344	32437344	G	A	1.44017e-09
	D03	D03_32437427	32437427	T	G	1.40228e-09
	D03	D03_32437521	32437521	C	A	2.76945e-10
	D03	D03_32437556	32437556	A	G	1.34383e-08
	D03	D03_32437565	32437565	T	C	1.34383e-08
	D03	D03_32437602	32437602	C	T	1.87688e-08
	D03	D03_32437619	32437619	T	C	1.48434e-08
	D03	D03_32437646	32437646	C	T	1.49783e-07
	D03	D03_32437725	32437725	A	G	3.06253e-09
	D03	D03_32437965	32437965	C	T	3.67907e-10
	D03	D03_32438121	32438121	C	T	4.40251e-10
	D03	D03_32438382	32438382	A	G	2.62249e-08
	D03	D03_32438450	32438450	T	C	2.49893e-08
	D03	D03_32438619	32438619	G	A	5.27069e-09
	D03	D03_32438641	32438641	G	A	3.27918e-08
	D03	D03_32438651	32438651	A	G	3.27918e-08
	D03	D03_32438674	32438674	A	C	6.67096e-09
	D03	D03_32438677	32438677	T	C	6.61146e-09
	D03	D03_32438693	32438693	C	T	3.4449e-09
	D03	D03_32439268	32439268	A	G	1.67067e-09
	D03	D03_32439272	32439272	T	G	1.67067e-09
	D03	D03_32439355	32439355	G	A	2.21225e-09
	D03	D03_32439912	32439912	G	A	1.11741e-08
	D03	D03_32439964	32439964	G	T	3.09666e-10
	D03	D03_32440168	32440168	C	T	1.05172e-09
	D03	D03_32441061	32441061	A	G	4.429e-08
	D03	D03_32441184	32441184	G	A	1.71661e-10
	D03	D03_32445365	32445365	A	G	4.86398e-10
	D03	D03_32445792	32445792	T	C	2.82027e-07
	D03	D03_32445922	32445922	T	C	8.30661e-10
	D03	D03_32445930	32445930	T	A	6.09659e-10
	D03	D03_32446385	32446385	A	C	7.55853e-08
	D03	D03_32447551	32447551	G	C	2.13816e-08
	D03	D03_32448782	32448782	C	T	9.55938e-09
	D03	D03_32448804	32448804	A	G	8.00161e-09
	D03	D03_32448814	32448814	C	A	8.96095e-09
	D03	D03_32450309	32450309	A	C	2.45021e-08
	D03	D03_32452451	32452451	T	C	4.99082e-09
	D03	D03_32452555	32452555	T	A	3.19502e-09
	D03	D03_32453190	32453190	T	C	1.05327e-09
	D03	D03_32453721	32453721	T	C	2.02367e-09
	D03	D03_32457374	32457374	G	A	6.14148e-08
	D03	D03_32457834	32457834	A	G	1.48703e-07
	D03	D03_32459330	32459330	T	A	8.52731e-10
	D03	D03_32459973	32459973	T	A	1.22462e-09
	D03	D03_32464800	32464800	T	C	4.10858e-10
	D03	D03_32465871	32465871	A	T	2.10577e-09
	D03	D03_32468552	32468552	A	G	8.75048e-09
	D03	D03_32468818	32468818	T	C	2.80559e-10
	D03	D03_32471269	32471269	G	T	1.23739e-08
	D03	D03_32475982	32475982	T	C	6.9441e-09
	D03	D03_32478174	32478174	A	C	1.2753e-09
	D03	D03_32478189	32478189	T	C	1.40895e-09
	D03	D03_32478426	32478426	C	G	6.94109e-08
	D03	D03_32478477	32478477	A	G	2.40997e-09
	D03	D03_32479681	32479681	T	C	7.95514e-09
	D03	D03_32479852	32479852	C	T	7.90103e-10
	D03	D03_32480126	32480126	G	A	6.84518e-08
	D03	D03_32480210	32480210	T	C	1.2023e-08
	D03	D03_32481686	32481686	A	G	2.09664e-09
	D03	D03_32484131	32484131	C	T	8.13909e-09
	D03	D03_32484215	32484215	C	T	1.26421e-09
	D03	D03_32484379	32484379	A	G	3.79244e-09
	D03	D03_32485852	32485852	G	A	2.21168e-08
	D03	D03_32486287	32486287	T	G	1.35166e-09
	D03	D03_32491521	32491521	G	T	1.22815e-08
	D03	D03_32491540	32491540	G	T	8.77939e-09
	D03	D03_32502852	32502852	A	G	1.05375e-08
	D03	D03_32503638	32503638	T	C	2.40134e-09
	D03	D03_32504382	32504382	G	T	1.18773e-09
	D03	D03_32505675	32505675	G	T	7.43901e-10
	D03	D03_32514276	32514276	T	C	1.04701e-08
	D03	D03_32514457	32514457	A	C	4.87837e-10
	D03	D03_32518834	32518834	T	G	1.05029e-08
	D03	D03_32520253	32520253	T	G	2.56999e-09
	D03	D03_32520262	32520262	A	G	3.18045e-09
	D03	D03_32520555	32520555	A	C	4.92425e-10
	D03	D03_32533108	32533108	A	G	7.15046e-10
	D03	D03_32533185	32533185	A	T	4.03134e-09
	D03	D03_32535122	32535122	G	T	1.41752e-09
	D03	D03_32541741	32541741	G	A	2.92705e-10
	D03	D03_32542724	32542724	C	T	1.23382e-09
	D03	D03_32542789	32542789	G	A	3.76938e-09
	D03	D03_32542961	32542961	T	A	2.42717e-09
	D03	D03_32543327	32543327	G	A	3.05772e-08
	D03	D03_32543698	32543698	C	T	1.46833e-09
	D03	D03_32544716	32544716	G	A	1.17497e-08
	D03	D03_32545023	32545023	C	A	7.79487e-08
	D03	D03_32545066	32545066	G	A	1.20279e-08
	D03	D03_32545254	32545254	A	G	1.41822e-08
	D03	D03_32545378	32545378	C	T	4.1243e-10
	D03	D03_32545401	32545401	T	G	3.30957e-10
	D03	D03_32545530	32545530	T	C	5.89942e-09
	D03	D03_32545549	32545549	C	A	9.49345e-10
	D03	D03_32545711	32545711	T	C	1.31812e-08
	D03	D03_32546033	32546033	T	C	7.18077e-08
	D03	D03_32546052	32546052	G	A	8.3289e-08
	D03	D03_32546279	32546279	A	G	2.06631e-09
	D03	D03_32546747	32546747	G	C	5.44829e-09
	D03	D03_32547015	32547015	C	A	7.40856e-09
	D03	D03_32549191	32549191	G	A	2.32916e-10
	D03	D03_32549391	32549391	T	G	2.99802e-09
	D03	D03_32557477	32557477	C	T	7.25812e-09
	D03	D03_32558224	32558224	G	T	1.54061e-08
	D03	D03_32558386	32558386	A	G	1.29251e-09
	D03	D03_32568727	32568727	A	G	5.64723e-10
	D03	D03_32568746	32568746	A	G	4.46635e-10
	D03	D03_32568855	32568855	G	A	1.45727e-09
	D03	D03_32569849	32569849	A	G	2.49177e-09
	D03	D03_32570144	32570144	T	C	4.7458e-10
	D03	D03_32570280	32570280	A	G	1.35663e-08
	D03	D03_32570341	32570341	T	C	1.51627e-09
	D03	D03_32570540	32570540	G	A	2.62428e-10
	D03	D03_32570850	32570850	G	A	2.3531e-08
	D03	D03_32571406	32571406	G	A	8.0928e-10
	D03	D03_32571670	32571670	G	A	2.0236e-09
	D03	D03_32574117	32574117	T	A	1.47988e-08
	D03	D03_32581138	32581138	C	T	7.32683e-08
	D03	D03_32581246	32581246	T	C	1.01403e-08
	D03	D03_32581328	32581328	C	T	1.60999e-08
	D03	D03_32581569	32581569	G	A	1.47304e-09
	D03	D03_32582235	32582235	G	A	2.86103e-10
	D03	D03_32582298	32582298	A	C	5.96187e-09
	D03	D03_32583569	32583569	A	C	8.99526e-11
	D03	D03_32583748	32583748	C	T	3.31236e-10
	D03	D03_32584646	32584646	T	A	1.03392e-09
	D03	D03_32585389	32585389	G	A	1.00625e-09
	D03	D03_32585430	32585430	A	G	5.06053e-09
	D03	D03_32585552	32585552	A	G	2.01724e-09
	D03	D03_32585751	32585751	T	C	2.02022e-09
	D03	D03_32586255	32586255	T	A	7.17951e-11
	D03	D03_32586615	32586615	A	G	1.53708e-09
	D03	D03_32586916	32586916	G	A	1.89114e-09
	D03	D03_32587043	32587043	C	T	5.38679e-10
	D03	D03_32587066	32587066	G	A	6.21425e-10
	D03	D03_32587215	32587215	C	T	1.35227e-09
	D03	D03_32587290	32587290	G	A	4.18246e-08
	D03	D03_32587355	32587355	T	C	4.04935e-10
	D03	D03_32587398	32587398	A	G	1.28472e-08
	D03	D03_32587779	32587779	T	G	4.84469e-09
	D03	D03_32587804	32587804	T	G	3.51797e-09
	D03	D03_32588036	32588036	G	C	1.42048e-08
	D03	D03_32588198	32588198	G	A	8.04862e-10
	D03	D03_32635192	32635192	A	G	3.66911e-08
	D03	D03_32890385	32890385	A	G	2.52058e-09
	D03	D03_32891085	32891085	C	T	4.13889e-07
	D03	D03_32892947	32892947	C	T	2.96188e-08
	D03	D03_32893158	32893158	A	G	1.99739e-07
	D03	D03_32893159	32893159	A	G	1.99739e-07
	D03	D03_32893176	32893176	A	G	1.87815e-07
	D03	D03_32893520	32893520	G	A	7.75299e-07
	D03	D03_32893576	32893576	A	G	1.6982e-08
	D03	D03_32893603	32893603	C	A	1.32652e-08
	D03	D03_32893625	32893625	G	A	1.55233e-08
	D03	D03_32894611	32894611	G	T	1.06002e-07
	D03	D03_32894719	32894719	A	G	1.90036e-08
	D03	D03_32894740	32894740	G	A	2.11378e-08
	D03	D03_32894889	32894889	T	C	2.9464e-08
	D03	D03_32895742	32895742	C	T	9.64882e-09
	D03	D03_32896070	32896070	C	T	2.87646e-08
	D03	D03_32900195	32900195	A	T	1.29747e-07
	D03	D03_32900291	32900291	G	A	6.92134e-09
	D03	D03_38522475	38522475	A	G	2.95318e-12
	D03	D03_38938264	38938264	T	C	2.16324e-10
	D03	D03_39145574	39145574	A	G	5.12077e-11
	D03	D03_39184099	39184099	C	A	4.18378e-08
	D03	D03_39302247	39302247	T	C	1.97886e-12
	D03	D03_39378324	39378324	A	G	5.80965e-15
	D03	D03_39477406	39477406	T	C	1.6267e-07
	D03	D03_39887149	39887149	G	T	3.09108e-11
	D03	D03_40596197	40596197	A	C	2.93525e-09
	D03	D03_41573996	41573996	T	C	3.83207e-08
	D03	D03_42958424	42958424	A	G	3.2164e-07
	D03	D03_43589158	43589158	A	G	9.99179e-07
	D03	D03_43621135	43621135	T	C	7.04818e-07
	D08	D08_67338388	67338388	T	C	6.61301e-07
	D08	D08_67338773	67338773	T	A	7.08615e-07

## Sheet: The CZ-specific Main-SNPs
Supplementary Table 10. The CZ-specific Main-SNPs using phenotype values of 419 upland cotton for GWAS
Trait	Chromosome	Maker	Position (bp)	allele1	allele0	P-value
FS	A07	A07_88739140	88739140	G	C	3.34685e-07
	A07	A07_88741590	88741590	A	G	8.58726e-07
	A07	A07_88741627	88741627	G	C	4.14716e-07
	A07	A07_88741628	88741628	T	A	4.14716e-07
	A07	A07_88743622	88743622	T	C	1.3156e-07
	A07	A07_90319816	90319816	A	G	2.20405e-08
	A07	A07_90319852	90319852	C	T	1.82671e-08
	A07	A07_90464540	90464540	T	G	7.892e-07
	A07	A07_90499176	90499176	A	G	4.6395e-09
	A07	A07_90503508	90503508	C	T	4.9545e-09
	A07	A07_90561217	90561217	A	G	1.1079e-08
	A07	A07_90561227	90561227	C	G	1.1079e-08
	A07	A07_90586661	90586661	C	A	7.10283e-09
	A07	A07_90586662	90586662	G	C	7.10283e-09
	D01	D01_5686515	5686515	T	C	8.5006e-08
	D11	D11_24511271	24511271	C	A	3.24166e-07
	D11	D11_24511278	24511278	C	T	5.32957e-07
	D11	D11_24511449	24511449	A	C	2.1882e-07
	D11	D11_24512737	24512737	A	G	8.43334e-08
	D11	D11_24512880	24512880	A	G	7.52978e-07
	D11	D11_24513364	24513364	G	A	1.68379e-07
	D11	D11_24517056	24517056	T	C	2.39193e-07
	D11	D11_24517062	24517062	T	G	8.84235e-09
	D11	D11_24523803	24523803	C	T	3.65531e-07
	D11	D11_24524036	24524036	C	G	6.01349e-07
	D11	D11_24527866	24527866	A	G	1.14636e-07
	D11	D11_24528053	24528053	T	C	2.62126e-07
	D11	D11_24530075	24530075	C	A	1.12803e-07
	D11	D11_24530082	24530082	C	T	1.12803e-07
	D11	D11_24530180	24530180	C	G	3.82288e-09
	D11	D11_24532030	24532030	C	T	6.65509e-07
	D11	D11_24532059	24532059	T	A	5.54666e-07
	D11	D11_24532110	24532110	T	A	5.58513e-07
	D11	D11_24532284	24532284	G	A	7.07189e-07
	D11	D11_24532719	24532719	T	C	4.45786e-07
	D11	D11_24532948	24532948	G	C	3.87343e-08
	D11	D11_24532972	24532972	A	G	3.22512e-08
	D11	D11_24533087	24533087	T	C	7.56988e-08
	D11	D11_24533105	24533105	T	C	1.44897e-07
	D11	D11_24533112	24533112	A	G	1.34125e-08
	D11	D11_24533182	24533182	C	T	5.85506e-07
	D11	D11_24533188	24533188	T	C	5.20347e-08
	D11	D11_24533234	24533234	C	T	2.71906e-07
	D11	D11_24533546	24533546	A	G	6.42083e-07
	D11	D11_24533680	24533680	G	A	3.63882e-07
	D11	D11_24533707	24533707	T	C	9.89568e-08
	D11	D11_24533730	24533730	A	G	2.20822e-07
	D11	D11_24533838	24533838	C	T	9.49432e-07
	D11	D11_24533879	24533879	T	C	2.80267e-07
	D11	D11_24533919	24533919	T	C	6.11535e-07
	D11	D11_24534070	24534070	T	C	6.0911e-07
	D11	D11_24534211	24534211	C	T	8.18016e-07
	D11	D11_24534879	24534879	C	T	1.26274e-07
	D11	D11_24534962	24534962	T	C	1.193e-07
	D11	D11_24535073	24535073	A	G	8.8539e-08
	D11	D11_24535124	24535124	G	A	2.36822e-07
	D11	D11_24535267	24535267	T	C	9.51699e-08
	D11	D11_24535354	24535354	T	C	1.05562e-07
	D11	D11_24535425	24535425	C	T	2.52797e-08
	D11	D11_24535531	24535531	A	G	2.51661e-07
	D11	D11_24535713	24535713	A	G	1.17028e-07
	D11	D11_24535859	24535859	G	A	1.15692e-07
	D11	D11_24538032	24538032	T	C	9.40405e-08
	D11	D11_24540688	24540688	A	G	5.88677e-07
	D11	D11_24540847	24540847	G	A	7.8131e-07
	D11	D11_24541023	24541023	C	T	9.69961e-07
	D11	D11_24541063	24541063	A	C	8.51174e-08
	D11	D11_24541065	24541065	T	G	8.32468e-08
	D11	D11_24542073	24542073	A	G	1.87246e-07
	D11	D11_24542142	24542142	A	G	1.36994e-07
	D11	D11_24542203	24542203	T	C	1.53732e-07
	D11	D11_24542306	24542306	C	T	6.48784e-07
	D11	D11_24542317	24542317	A	G	2.37825e-07
	D11	D11_24543121	24543121	G	A	4.66137e-07
	D11	D11_24543232	24543232	A	G	3.1486e-08
	D11	D11_24546205	24546205	G	T	1.16394e-07
	D11	D11_24547744	24547744	T	A	7.94724e-07
	D11	D11_24550791	24550791	C	T	6.11176e-08
	D11	D11_24552738	24552738	G	A	1.84921e-07
	D11	D11_24554849	24554849	T	C	6.40283e-07
	D11	D11_24555912	24555912	A	G	3.38566e-07
	D11	D11_24556356	24556356	T	G	1.37578e-08
	D11	D11_24556619	24556619	A	G	3.5687e-07
	D11	D11_24557935	24557935	G	A	5.38483e-07
	D11	D11_24558478	24558478	A	G	8.43513e-07
	D11	D11_24558494	24558494	A	G	3.19212e-07
	D11	D11_24559285	24559285	T	C	2.53593e-07
	D11	D11_24559329	24559329	T	C	7.68772e-07
	D11	D11_24559479	24559479	A	C	4.4269e-07
	D11	D11_24559480	24559480	T	A	5.27761e-07
	D11	D11_24559844	24559844	A	C	3.58854e-09
	D11	D11_24559849	24559849	C	A	3.29283e-10
	D11	D11_24559877	24559877	C	T	4.99467e-09
	D11	D11_24559891	24559891	G	T	2.78806e-08
	D11	D11_24559905	24559905	T	C	2.88172e-08
	D11	D11_24560227	24560227	G	T	4.84411e-07
	D11	D11_24560277	24560277	T	C	2.53725e-08
	D11	D11_24560984	24560984	A	G	1.252e-07
	D11	D11_24561127	24561127	C	T	8.97254e-08
	D11	D11_24576649	24576649	A	G	8.69369e-07
	D11	D11_24576734	24576734	A	G	1.61198e-08
	D11	D11_24576865	24576865	T	C	7.09114e-07
	D11	D11_24576956	24576956	C	A	8.61431e-08
	D11	D11_24580424	24580424	A	G	3.52705e-07
	D11	D11_24580509	24580509	C	T	4.93712e-07
	D11	D11_24583247	24583247	T	A	2.13641e-08
	D11	D11_24583249	24583249	A	G	2.13641e-08
	D11	D11_24583793	24583793	A	G	9.55721e-08
	D11	D11_24583805	24583805	A	G	1.68625e-07
	D11	D11_24584093	24584093	G	C	4.0921e-07
	D11	D11_24584251	24584251	A	G	4.43131e-07
	D11	D11_24584355	24584355	A	G	4.74716e-07
	D11	D11_24584360	24584360	T	C	6.36573e-07
	D11	D11_24584557	24584557	T	A	2.82618e-07
	D11	D11_24584569	24584569	T	C	1.09889e-07
	D11	D11_24584656	24584656	C	A	7.6774e-08
	D11	D11_24584683	24584683	T	C	1.3885e-08
	D11	D11_24584713	24584713	T	C	5.78175e-08
	D11	D11_24584720	24584720	C	A	4.43043e-07
	D11	D11_24585282	24585282	A	G	1.99261e-07
	D11	D11_24585298	24585298	T	C	3.04168e-07
	D11	D11_24585657	24585657	C	T	2.67247e-07
	D11	D11_24586536	24586536	A	C	2.67817e-07
	D11	D11_24586619	24586619	G	A	2.92894e-08
	D11	D11_24586961	24586961	T	C	8.29302e-08
	D11	D11_24587385	24587385	C	T	1.52369e-07
	D11	D11_24587389	24587389	C	T	1.52369e-07
	D11	D11_24587415	24587415	A	G	4.5363e-08
	D11	D11_24587600	24587600	A	G	7.13423e-07
	D11	D11_24587637	24587637	C	T	5.97231e-07
	D11	D11_24587808	24587808	A	G	3.50162e-07
	D11	D11_24587857	24587857	T	A	5.21951e-08
	D11	D11_24587872	24587872	C	T	3.94575e-07
	D11	D11_24587884	24587884	T	C	1.03366e-07
	D11	D11_24588012	24588012	A	G	1.51107e-07
	D11	D11_24588188	24588188	A	G	1.38662e-07
	D11	D11_24588223	24588223	A	G	1.86977e-07
	D11	D11_24588469	24588469	C	T	1.5265e-07
	D11	D11_24588573	24588573	A	G	2.73281e-07
	D11	D11_24589211	24589211	T	C	7.04624e-08
	D11	D11_24589266	24589266	A	C	8.87147e-08
	D11	D11_24589345	24589345	G	A	4.64141e-07
	D11	D11_24590168	24590168	A	C	5.40516e-07
	D11	D11_24590186	24590186	T	C	1.4843e-07
	D11	D11_24590356	24590356	A	G	3.54297e-07
	D11	D11_24590534	24590534	C	T	2.76796e-07
	D11	D11_24590536	24590536	G	A	2.76796e-07
	D11	D11_24591253	24591253	A	G	1.5544e-07
	D11	D11_24591290	24591290	T	C	3.40867e-07
	D11	D11_24591427	24591427	A	G	6.54511e-07
	D11	D11_24591481	24591481	G	A	6.80257e-07
	D11	D11_24591611	24591611	C	A	7.63957e-07
	D11	D11_24591997	24591997	G	A	1.41635e-07
	D11	D11_24592019	24592019	T	C	1.64113e-07
	D11	D11_24592412	24592412	G	A	4.97606e-08
	D11	D11_24592467	24592467	A	G	4.96419e-07
	D11	D11_24592522	24592522	A	G	1.16515e-07
	D11	D11_24592776	24592776	T	C	8.48389e-07
	D11	D11_24593467	24593467	G	T	6.18034e-07
	D11	D11_24598552	24598552	T	A	8.76804e-08
	D11	D11_24598636	24598636	T	A	1.31614e-07
	D11	D11_24614085	24614085	T	C	6.34603e-08
	D11	D11_24614130	24614130	A	G	6.08458e-07
	D11	D11_24615998	24615998	A	G	9.55665e-08
	D11	D11_24616033	24616033	A	G	4.49976e-08
	D11	D11_24616184	24616184	A	G	1.39979e-07
	D11	D11_24616726	24616726	T	C	4.7736e-09
	D11	D11_24616878	24616878	T	C	1.1453e-07
	D11	D11_24616884	24616884	T	C	1.64643e-07
	D11	D11_24616924	24616924	T	C	5.59124e-07
	D11	D11_24619742	24619742	A	C	1.72911e-07
	D11	D11_24622922	24622922	C	T	3.0182e-07
	D11	D11_24623719	24623719	T	G	5.71775e-07
	D11	D11_24624130	24624130	C	A	3.20558e-07
	D11	D11_24624341	24624341	G	A	5.59666e-07
	D11	D11_24626286	24626286	T	C	3.51206e-07
	D11	D11_24627768	24627768	C	T	5.93568e-07
	D11	D11_24627860	24627860	G	A	5.14745e-09
	D11	D11_24628029	24628029	T	C	1.08178e-08
	D11	D11_24628225	24628225	C	T	1.30394e-08
	D11	D11_24628280	24628280	C	T	6.56328e-07
	D11	D11_24628557	24628557	C	T	5.72603e-07
	D11	D11_24630425	24630425	T	C	3.55525e-08
	D11	D11_24635613	24635613	G	A	6.58081e-07
	D11	D11_24635619	24635619	G	A	7.95639e-07
	D11	D11_24636013	24636013	A	T	8.6397e-07
	D11	D11_24637361	24637361	A	G	8.98656e-08
	D11	D11_24637581	24637581	T	G	1.62017e-07
	D11	D11_24637948	24637948	A	G	4.85819e-08
	D11	D11_24638169	24638169	T	C	1.57128e-07
	D11	D11_24638651	24638651	G	T	6.68537e-07
	D11	D11_24638715	24638715	T	C	3.77321e-09
	D11	D11_24638824	24638824	A	G	8.37717e-08
	D11	D11_24638964	24638964	T	C	6.54132e-07
	D11	D11_24639533	24639533	A	G	1.38778e-07
	D11	D11_24639561	24639561	G	C	3.10424e-07
	D11	D11_24640201	24640201	C	G	8.62547e-08
	D11	D11_24640935	24640935	T	C	5.25582e-08
	D11	D11_24641193	24641193	A	G	9.16641e-07
	D11	D11_24641238	24641238	A	G	1.06867e-08
	D11	D11_24641240	24641240	A	G	1.06867e-08
	D11	D11_24641446	24641446	G	C	5.57216e-07
	D11	D11_24641471	24641471	C	T	5.20988e-07
	D11	D11_24641487	24641487	C	G	7.80518e-07
	D11	D11_24641555	24641555	C	G	2.53783e-07
	D11	D11_24641701	24641701	C	T	2.95687e-08
	D11	D11_24641741	24641741	T	C	8.90419e-08
	D11	D11_24641802	24641802	A	T	8.53021e-07
	D11	D11_24657149	24657149	A	C	6.84068e-07
	D11	D11_24657274	24657274	G	A	5.03556e-07
	D11	D11_24658212	24658212	A	G	1.45691e-07
	D11	D11_24658402	24658402	A	G	3.26555e-07
	D11	D11_24658763	24658763	T	G	8.77023e-07
	D11	D11_24659269	24659269	C	A	1.12254e-07
	D11	D11_24659631	24659631	A	G	9.9733e-08
	D11	D11_24660645	24660645	A	C	3.60523e-07
	D11	D11_24660658	24660658	G	A	8.85388e-07
	D11	D11_24661838	24661838	A	G	4.34721e-07
	D11	D11_24662764	24662764	A	G	4.63941e-07
	D11	D11_24662947	24662947	A	G	9.55382e-07
	D11	D11_24662980	24662980	A	G	3.28111e-07
	D11	D11_24663630	24663630	T	C	2.19836e-07
	D11	D11_24668329	24668329	C	A	9.98469e-07
	D11	D11_24669170	24669170	T	G	1.83944e-07
	D11	D11_24669535	24669535	G	A	5.90406e-08
	D11	D11_24671053	24671053	T	C	3.41717e-08
	D11	D11_24671076	24671076	C	T	1.73792e-08
	D11	D11_24671829	24671829	C	G	2.95312e-07
	D11	D11_24672059	24672059	C	T	1.57904e-08
	D11	D11_24673880	24673880	C	A	5.28604e-07
	D11	D11_24675561	24675561	A	T	2.31098e-07
	D11	D11_24676672	24676672	A	G	3.25546e-07
	D11	D11_24676916	24676916	A	G	1.13674e-07
	D11	D11_24677148	24677148	T	C	2.86242e-08
	D11	D11_24677298	24677298	C	A	5.99588e-07
	D11	D11_24677787	24677787	A	G	2.34285e-08
	D11	D11_24677858	24677858	T	C	4.39211e-07
	D11	D11_24678174	24678174	C	A	3.51657e-08
	D11	D11_24678919	24678919	A	G	1.70259e-07
	D11	D11_24679045	24679045	C	A	4.48155e-07
	D11	D11_24682076	24682076	C	T	1.4356e-08
	D11	D11_24683425	24683425	C	T	2.68062e-07
	D11	D11_24684071	24684071	T	C	7.26666e-07
	D11	D11_24684337	24684337	G	A	3.29625e-07
	D11	D11_24686383	24686383	T	C	1.21096e-07
	D11	D11_24687450	24687450	T	C	5.66698e-07
	D11	D11_24687621	24687621	A	G	1.19884e-07
	D11	D11_24687702	24687702	A	T	3.02134e-08
	D11	D11_24687842	24687842	C	A	2.05637e-07
	D11	D11_24687874	24687874	G	T	3.07009e-07
	D11	D11_24687885	24687885	G	C	2.72189e-08
	D11	D11_24687989	24687989	T	G	1.17437e-07
	D11	D11_24688313	24688313	A	G	1.65629e-07
	D11	D11_24688369	24688369	T	G	1.35486e-08
	D11	D11_24689096	24689096	T	G	4.10898e-07
	D11	D11_24689162	24689162	A	G	2.19925e-07
	D11	D11_24689219	24689219	T	G	1.83466e-07
	D11	D11_24690226	24690226	C	A	7.27385e-07
	D11	D11_24690395	24690395	C	T	3.20537e-07
	D11	D11_24692428	24692428	T	C	5.7368e-07
	D11	D11_24695490	24695490	T	G	1.20549e-07
	D11	D11_24696984	24696984	G	C	3.75904e-07
	D11	D11_24696996	24696996	G	T	3.87215e-08
	D11	D11_24697052	24697052	A	G	3.70217e-08
	D11	D11_24698114	24698114	T	C	9.70658e-08
	D11	D11_24698584	24698584	A	G	9.92935e-07
	D11	D11_24705503	24705503	C	A	3.98222e-07
	D11	D11_24712589	24712589	A	G	5.06808e-07
	D11	D11_24713703	24713703	C	T	2.98104e-07
	D11	D11_24718144	24718144	G	A	2.24111e-07
LP	A02	A02_97246028	97246028	C	T	2.19112e-07
	A02	A02_97248210	97248210	A	G	7.13862e-07
	A02	A02_97250053	97250053	T	C	6.25073e-07
	A02	A02_97261646	97261646	T	C	3.03118e-07
	A02	A02_97261699	97261699	A	G	1.90843e-07
	A02	A02_97261933	97261933	A	G	7.33216e-07
	A02	A02_97262698	97262698	G	A	5.45407e-07
	A02	A02_97262748	97262748	A	G	2.76502e-07
	A02	A02_97262795	97262795	A	G	5.00393e-07
	A02	A02_97263526	97263526	G	A	6.02098e-07
	A02	A02_97264605	97264605	G	A	9.58368e-07
	A02	A02_97264621	97264621	T	C	9.87575e-07
	A02	A02_97265369	97265369	C	T	3.46388e-07
	A02	A02_97265791	97265791	T	C	5.10783e-07
	A02	A02_97266015	97266015	G	A	5.68143e-07
	A02	A02_97267095	97267095	C	T	4.06741e-07
	A02	A02_97267159	97267159	T	C	5.82608e-07
	A02	A02_97267185	97267185	G	T	1.70451e-07
	A02	A02_97267253	97267253	G	C	7.28891e-07
	A02	A02_97267721	97267721	G	A	3.69869e-07
	A02	A02_97269007	97269007	A	G	8.77123e-07
	A02	A02_97269269	97269269	T	C	3.85014e-07
	A02	A02_97269628	97269628	G	T	5.93265e-07
	A02	A02_97269649	97269649	C	T	4.27253e-07
	A02	A02_97269654	97269654	G	T	4.27253e-07
	A02	A02_97270385	97270385	A	G	4.70076e-07
	A02	A02_97271046	97271046	A	T	5.87183e-07
	A02	A02_97277089	97277089	G	C	8.31611e-07
	A02	A02_97277098	97277098	T	C	5.26028e-07
	A02	A02_97277187	97277187	T	C	6.18417e-07
	A02	A02_97277373	97277373	G	A	4.31659e-07
	A02	A02_97284052	97284052	A	G	3.36892e-07
	A02	A02_97284652	97284652	C	A	3.5396e-07
	A02	A02_97288506	97288506	G	T	3.88636e-07
	A02	A02_97288516	97288516	A	G	5.89784e-07
	A02	A02_97294037	97294037	C	G	9.47493e-07
	A02	A02_97380979	97380979	T	C	2.17981e-07
	A02	A02_97402725	97402725	A	G	4.1497e-07
	A02	A02_97406614	97406614	T	G	8.87278e-07
	A02	A02_97406835	97406835	G	A	4.65503e-07
	A02	A02_97406852	97406852	C	T	3.45994e-07
	A02	A02_97407085	97407085	G	T	4.62522e-07
	A02	A02_97407090	97407090	C	T	2.58988e-07
	A02	A02_97407328	97407328	T	A	2.05642e-07
	A02	A02_97408299	97408299	A	T	6.25209e-07
	A02	A02_97408620	97408620	A	G	5.34061e-07
	A02	A02_97408816	97408816	C	T	8.09455e-07
	A02	A02_97409206	97409206	G	A	7.12443e-07
	A02	A02_97409974	97409974	C	T	6.20464e-07
	A02	A02_97410618	97410618	A	G	4.39298e-07
	A02	A02_97410634	97410634	A	G	4.74556e-07
	A02	A02_97410915	97410915	G	T	4.74361e-07
	A02	A02_97411277	97411277	A	T	8.06452e-07
	A02	A02_97412389	97412389	G	C	4.94742e-07
	A02	A02_97412787	97412787	C	T	4.36846e-07
	A02	A02_97412788	97412788	A	G	2.49495e-07
	A02	A02_97412858	97412858	C	T	4.404e-07
	A02	A02_97415811	97415811	A	G	8.7877e-07
	A02	A02_97415849	97415849	T	C	8.91406e-07
	A02	A02_97416214	97416214	T	A	2.0948e-07
	A02	A02_97416280	97416280	T	C	6.39848e-07
	A02	A02_97417315	97417315	T	C	4.82582e-07
	A02	A02_97417414	97417414	G	T	3.7367e-07
	A02	A02_97417427	97417427	A	G	6.51315e-07
	A02	A02_97419614	97419614	A	T	1.7801e-07
	A02	A02_97419760	97419760	G	T	3.46776e-07
	A02	A02_97419868	97419868	A	G	6.99355e-07
	A02	A02_97420026	97420026	C	T	4.28182e-07
	A02	A02_97424333	97424333	C	T	2.80427e-07
	A02	A02_97425259	97425259	G	A	2.37971e-07
	A02	A02_97425264	97425264	A	G	4.37087e-07
	A02	A02_97425688	97425688	T	A	2.01576e-07
	A02	A02_97433514	97433514	T	C	9.12231e-07
	A02	A02_97437813	97437813	C	T	9.86036e-07
	A02	A02_97438803	97438803	A	G	5.66384e-07
	A02	A02_97438909	97438909	A	G	6.45797e-07
	A02	A02_97525401	97525401	A	G	1.94041e-07
	A06	A06_17887849	17887849	A	G	9.34419e-07
	A08	A08_23142269	23142269	A	C	8.91334e-09
	A08	A08_23391605	23391605	C	T	5.79493e-08
	A08	A08_24093784	24093784	G	C	6.89689e-08
	A08	A08_24093800	24093800	A	G	1.78717e-08
	A08	A08_24095321	24095321	A	C	7.80767e-07
	A08	A08_24346463	24346463	T	C	8.87492e-07
	A08	A08_24346469	24346469	T	A	8.87492e-07
	A08	A08_24346562	24346562	G	A	7.35466e-08
	A08	A08_24868668	24868668	C	G	3.9044e-08
	A08	A08_25140492	25140492	C	T	1.35433e-07
	A08	A08_25397177	25397177	G	A	4.56029e-07
	A08	A08_25475609	25475609	G	A	8.07943e-08
	A08	A08_25617940	25617940	C	T	5.61961e-07
	A08	A08_25706203	25706203	A	G	7.74928e-08
	A08	A08_25857064	25857064	G	A	1.39257e-07
	A08	A08_25858454	25858454	T	C	2.56406e-08
	A08	A08_25868446	25868446	T	C	1.27857e-08
	A08	A08_26323119	26323119	A	C	5.27844e-07
	A08	A08_26508402	26508402	A	G	1.66563e-07
	A08	A08_26700235	26700235	T	C	1.99048e-07
	A08	A08_26700267	26700267	A	C	9.05966e-07
	A08	A08_26772377	26772377	T	C	3.17599e-08
	A08	A08_26772395	26772395	A	G	5.55837e-09
	A08	A08_27125417	27125417	A	G	4.14821e-07
	A08	A08_27128289	27128289	T	G	2.38818e-08
	A08	A08_27225292	27225292	T	C	7.67878e-07
	A08	A08_27853085	27853085	C	T	1.46066e-07
	A08	A08_28223374	28223374	C	T	3.26949e-08
	A08	A08_28358643	28358643	G	A	5.94069e-07
	A08	A08_28778048	28778048	C	T	3.05504e-09
	A08	A08_28824078	28824078	C	T	3.28042e-09
	A08	A08_28824970	28824970	G	A	6.70429e-10
	A08	A08_29320563	29320563	A	G	2.49049e-07
	A08	A08_30105711	30105711	C	T	4.23349e-07
	A08	A08_30309681	30309681	A	T	5.54012e-07
	A08	A08_30575039	30575039	A	G	8.26613e-07
	A08	A08_30685061	30685061	A	C	2.55268e-07
	A08	A08_30827414	30827414	G	A	8.82802e-07
	A08	A08_30897318	30897318	G	A	5.0773e-07
	A08	A08_30999738	30999738	T	C	6.30624e-07
	A08	A08_31347339	31347339	G	A	5.97096e-07
	A08	A08_31557283	31557283	T	C	9.73774e-08
	A08	A08_31692095	31692095	C	T	1.75938e-07
	A08	A08_32222316	32222316	A	G	1.59732e-07
	A08	A08_32225074	32225074	C	A	1.76849e-07
	A08	A08_32237965	32237965	T	G	6.44301e-08
	A08	A08_32299059	32299059	G	A	6.4219e-09
	A08	A08_32361420	32361420	C	T	7.07401e-07
	A08	A08_32397475	32397475	G	A	5.92344e-08
	A08	A08_32422544	32422544	A	T	9.34204e-10
	A08	A08_32574370	32574370	G	A	3.43796e-07
	A08	A08_32612685	32612685	T	A	6.45847e-07
	A08	A08_32749782	32749782	A	G	1.16983e-07
	A08	A08_33779437	33779437	G	C	1.19122e-07
	A08	A08_34264496	34264496	T	G	3.56217e-08
	A08	A08_34699260	34699260	C	T	1.99847e-07
	A08	A08_35313738	35313738	A	G	5.91489e-07
	A08	A08_35313756	35313756	T	C	7.62455e-07
	A08	A08_35487824	35487824	C	G	7.27558e-07
	A08	A08_35808297	35808297	A	G	4.1366e-07
	A08	A08_35838414	35838414	G	T	4.12858e-08
	A08	A08_35925221	35925221	G	C	5.85851e-07
	A08	A08_36202364	36202364	C	T	2.19798e-07
	A08	A08_36490140	36490140	A	G	3.20145e-07
	A08	A08_37068390	37068390	G	A	7.98144e-08
	A08	A08_37069501	37069501	G	A	8.09777e-07
	A08	A08_37070756	37070756	G	A	5.88913e-08
	A08	A08_37070760	37070760	G	A	5.88913e-08
	A08	A08_37388695	37388695	G	T	2.0215e-09
	A08	A08_37853625	37853625	T	C	7.60827e-07
	A08	A08_37938558	37938558	T	A	9.28727e-07
	A08	A08_38144630	38144630	C	T	4.14472e-07
	A08	A08_38190420	38190420	T	C	4.27018e-07
	A08	A08_38280919	38280919	A	G	5.94575e-10
	A08	A08_38280955	38280955	C	G	4.47659e-09
	A08	A08_38291710	38291710	A	T	3.20249e-07
	A08	A08_38523825	38523825	G	A	1.92183e-08
	A08	A08_38593726	38593726	A	G	1.47163e-08
	A08	A08_38693755	38693755	C	A	2.95384e-08
	A08	A08_38767780	38767780	A	C	7.29634e-07
	A08	A08_38947263	38947263	T	C	1.0469e-08
	A08	A08_38989368	38989368	G	A	7.24599e-07
	A08	A08_39134928	39134928	A	G	1.74085e-07
	A08	A08_39134969	39134969	C	T	2.23119e-07
	A08	A08_39609074	39609074	T	C	3.12885e-07
	A08	A08_39695138	39695138	C	T	1.74111e-07
	A08	A08_40063145	40063145	T	C	3.54489e-07
	A08	A08_40119483	40119483	C	A	2.77787e-08
	A08	A08_40429084	40429084	C	T	2.30209e-07
	A08	A08_40429094	40429094	C	T	1.82484e-07
	A08	A08_40541347	40541347	A	G	1.22122e-07
	A08	A08_41216043	41216043	A	G	4.36715e-07
	A08	A08_41237251	41237251	T	C	3.82511e-07
	A08	A08_41756315	41756315	C	A	9.78469e-09
	A08	A08_42614137	42614137	G	A	8.76734e-07
	A08	A08_42751600	42751600	C	G	2.79459e-07
	A08	A08_42851657	42851657	G	T	1.82743e-08
	A08	A08_42931841	42931841	G	A	1.61765e-07
	A08	A08_43629581	43629581	T	C	6.8195e-07
	A08	A08_43679938	43679938	T	C	2.32111e-08
	A08	A08_43823451	43823451	A	G	1.79045e-07
	A08	A08_44125515	44125515	G	A	1.12479e-07
	A08	A08_44133418	44133418	A	G	1.74419e-07
	A08	A08_44537252	44537252	C	T	9.59687e-07
	A08	A08_44893170	44893170	C	T	1.43516e-07
	A08	A08_45540400	45540400	C	T	8.04239e-07
	A08	A08_45611471	45611471	G	A	9.99036e-07
	A08	A08_45814487	45814487	C	T	9.32121e-07
	A08	A08_46168983	46168983	A	G	2.78973e-07
	A08	A08_46469932	46469932	C	T	2.88608e-08
	A08	A08_46469988	46469988	T	G	9.26812e-07
	A08	A08_46607815	46607815	C	T	1.30493e-07
	A08	A08_46639050	46639050	C	T	1.37051e-07
	A08	A08_46670307	46670307	C	T	7.24263e-10
	A08	A08_46874385	46874385	T	C	2.74134e-07
	A08	A08_46874446	46874446	G	A	1.22752e-08
	A08	A08_48078775	48078775	A	G	1.41941e-07
	A08	A08_48276602	48276602	T	C	1.12787e-08
	A08	A08_48561019	48561019	C	G	4.25576e-07
	A08	A08_48574058	48574058	T	C	6.91437e-07
	A08	A08_48591519	48591519	G	A	8.30973e-08
	A08	A08_48934463	48934463	A	G	1.86184e-07
	A08	A08_48944799	48944799	T	G	3.05047e-07
	A08	A08_49220347	49220347	A	C	1.05938e-08
	A08	A08_49292591	49292591	G	A	7.02218e-08
	A08	A08_49566789	49566789	G	A	8.49949e-07
	A08	A08_49705881	49705881	C	G	4.95679e-07
	A08	A08_49991946	49991946	T	C	5.80026e-09
	A08	A08_49992851	49992851	T	C	1.75271e-08
	A08	A08_50501195	50501195	T	C	9.39361e-07
	A08	A08_51115575	51115575	T	C	1.85967e-07
	A08	A08_52282205	52282205	A	G	8.02811e-07
	A08	A08_52515911	52515911	T	C	2.67442e-08
	A08	A08_53732411	53732411	A	G	5.87482e-08
	A08	A08_53739383	53739383	C	T	2.94723e-10
	A08	A08_54596398	54596398	G	A	5.04295e-07
	A08	A08_54704473	54704473	T	G	2.23112e-07
	A08	A08_54793301	54793301	G	A	9.69914e-08
	A08	A08_54918189	54918189	A	G	2.08577e-07
	A08	A08_54927307	54927307	T	C	2.34581e-07
	A08	A08_54975654	54975654	G	A	3.53714e-08
	A08	A08_55084385	55084385	G	A	8.79727e-08
	A08	A08_55192641	55192641	G	A	9.81676e-07
	A08	A08_56009125	56009125	G	A	2.90911e-08
	A08	A08_56284316	56284316	C	G	6.08367e-07
	A08	A08_56550469	56550469	T	A	2.98976e-07
	A08	A08_56816863	56816863	C	T	9.50463e-07
	A08	A08_57026086	57026086	A	G	7.9394e-07
	A08	A08_57539516	57539516	T	C	3.72496e-07
	A08	A08_58136120	58136120	G	A	5.84026e-08
	A08	A08_58269402	58269402	C	T	8.66397e-07
	A08	A08_59587696	59587696	G	A	9.9639e-08
	A08	A08_59649222	59649222	T	A	8.95263e-07
	A08	A08_59650719	59650719	T	C	9.43049e-08
	A08	A08_59761800	59761800	C	A	4.55706e-08
	A08	A08_60956588	60956588	G	A	6.73697e-08
	A08	A08_61164424	61164424	C	A	7.06591e-07
	A08	A08_63590614	63590614	C	T	3.50555e-07
	A08	A08_63727942	63727942	T	C	3.92787e-07
	A08	A08_64001295	64001295	A	T	3.07162e-10
	A08	A08_64048106	64048106	A	G	3.85943e-07
	A08	A08_64048111	64048111	A	G	3.71533e-07
	A08	A08_64164443	64164443	T	G	5.09656e-07
	A08	A08_64554724	64554724	G	T	5.83556e-07
	A08	A08_65113937	65113937	A	T	6.06736e-07
	A08	A08_65222770	65222770	C	T	7.35063e-07
	A08	A08_65375142	65375142	C	G	3.00951e-07
	A08	A08_65497154	65497154	C	A	6.95818e-07
	A08	A08_65735221	65735221	G	C	3.0333e-07
	A08	A08_65981131	65981131	C	T	3.03314e-10
	A08	A08_66131890	66131890	G	A	5.2082e-08
	A08	A08_66421731	66421731	T	G	1.38309e-08
	A08	A08_66607794	66607794	C	T	3.20379e-07
	A08	A08_66648002	66648002	C	A	3.99956e-08
	A08	A08_66844379	66844379	G	A	1.57256e-07
	A08	A08_67177788	67177788	A	G	2.713e-07
	A08	A08_67477755	67477755	G	C	9.18874e-07
	A08	A08_68523289	68523289	C	T	2.29811e-07
	A08	A08_68523416	68523416	T	C	3.45843e-07
	A08	A08_68952119	68952119	T	C	6.39248e-09
	A08	A08_68997126	68997126	A	G	3.65498e-08
	A08	A08_69311660	69311660	A	G	3.71138e-07
	A08	A08_69356341	69356341	T	C	2.14574e-07
	A08	A08_69390552	69390552	T	C	5.23939e-07
	A08	A08_69539044	69539044	A	G	5.58528e-07
	A08	A08_69688082	69688082	A	G	3.7948e-07
	A08	A08_69709473	69709473	T	C	2.17132e-09
	A08	A08_70608484	70608484	G	A	4.12292e-07
	A08	A08_70739259	70739259	T	C	1.65816e-07
	A08	A08_71131627	71131627	T	C	1.46382e-07
	A08	A08_71283356	71283356	T	C	5.87599e-07
	A08	A08_71804110	71804110	C	G	1.95421e-08
	A08	A08_71956633	71956633	G	A	2.25056e-07
	A08	A08_72044831	72044831	G	A	2.87507e-08
	A08	A08_72218365	72218365	C	T	1.97861e-07
	A08	A08_72478371	72478371	T	C	1.68181e-07
	A08	A08_72634233	72634233	T	C	1.45501e-07
	A08	A08_72985975	72985975	C	A	4.0378e-08
	A08	A08_72985982	72985982	A	G	4.0378e-08
	A08	A08_73160104	73160104	G	A	4.9295e-08
	A08	A08_73501235	73501235	C	T	2.10526e-07
	A08	A08_73504321	73504321	G	T	1.2663e-08
	A08	A08_73510022	73510022	C	T	1.87105e-07
	A08	A08_73663375	73663375	T	C	1.99691e-07
	A08	A08_73834934	73834934	T	C	1.65544e-07
	A08	A08_73876246	73876246	C	G	5.91762e-08
	A08	A08_74252761	74252761	G	T	2.40706e-08
	A08	A08_74518480	74518480	G	A	5.53924e-08
	A08	A08_74587140	74587140	A	G	1.31331e-08
	A08	A08_74761842	74761842	G	A	8.40221e-07
	A08	A08_74944180	74944180	G	A	3.42774e-07
	A08	A08_74963243	74963243	A	G	2.15996e-09
	A08	A08_74997773	74997773	A	C	3.18242e-10
	A08	A08_75176208	75176208	T	C	3.29726e-09
	A08	A08_75665363	75665363	T	C	2.3645e-08
	A08	A08_75692221	75692221	T	A	1.18204e-07
	A08	A08_75791664	75791664	G	A	2.54928e-08
	A08	A08_76395961	76395961	G	A	3.59544e-08
	A08	A08_76395963	76395963	C	T	3.59544e-08
	A08	A08_76701691	76701691	A	G	2.47936e-08
	A08	A08_76905017	76905017	G	A	3.78911e-08
	A08	A08_78005354	78005354	A	G	4.01985e-07
	A08	A08_78149752	78149752	C	T	1.53098e-07
	A12	A12_88316310	88316310	A	G	2.53004e-07
	A12	A12_88562957	88562957	C	A	1.37098e-07
	A12	A12_91871714	91871714	T	C	2.04476e-07
	D02	D02_137021	137021	T	G	5.68319e-07
	D02	D02_137027	137027	T	A	5.68319e-07

## Sheet: The YC-specific Main-SNPs
Supplementary Table 10. The YC-specific Main-SNPs using phenotype values of 419 upland cotton for GWAS
Trait	Chromosome	Maker	Position (bp)	allele1	allele0	P-value
M	A07	A07_1170221	1170221	T	G	2.8112e-07
	A07	A07_1170739	1170739	G	T	2.89036e-07
	A07	A07_2420968	2420968	A	T	1.8256e-07
	A07	A07_2420969	2420969	T	A	1.8256e-07
	A07	A07_2421031	2421031	C	T	4.79218e-07
	A07	A07_2427657	2427657	A	G	3.73021e-07
	A07	A07_2438549	2438549	T	G	2.17037e-07
	A07	A07_2449960	2449960	G	A	1.0242e-07
	A07	A07_2451098	2451098	G	A	2.22349e-07
	A07	A07_2453498	2453498	C	T	4.18046e-07
	A07	A07_2455969	2455969	T	G	4.9668e-08
	A07	A07_2456202	2456202	G	A	7.83275e-08
	A07	A07_2457081	2457081	T	G	2.53515e-07
	A07	A07_2457119	2457119	T	C	5.47383e-08
	D02	D02_5854259	5854259	T	A	3.92901e-07
	D02	D02_5855371	5855371	A	G	7.00991e-08
	D02	D02_5888325	5888325	C	T	1.74521e-07
	D02	D02_5888347	5888347	C	T	2.62126e-07
	D02	D02_5888929	5888929	G	T	7.4927e-07
	D11	D11_28946596	28946596	A	G	8.85393e-07
	D11	D11_28959679	28959679	T	C	9.014e-07
	D11	D11_28972918	28972918	G	A	4.33394e-07
	D11	D11_28990696	28990696	G	A	5.57897e-07
	D11	D11_29017392	29017392	G	T	7.58657e-07
	D11	D11_29017454	29017454	T	A	9.4798e-07
	D11	D11_29095157	29095157	C	T	4.99832e-07
	D11	D11_29494837	29494837	T	C	4.65128e-07
	D11	D11_29651871	29651871	C	T	1.95586e-07
	D11	D11_29784456	29784456	G	A	2.81031e-07
	D11	D11_30420179	30420179	C	T	8.6474e-07
	D11	D11_30421281	30421281	T	C	9.02345e-07
	D11	D11_30430917	30430917	T	C	9.08644e-07
	D11	D11_30433966	30433966	A	G	9.53121e-08
	D11	D11_30446362	30446362	C	G	9.60572e-07
	D11	D11_30455283	30455283	A	T	2.28179e-07
	D11	D11_30455476	30455476	A	G	5.57944e-07
	D11	D11_30459098	30459098	T	C	1.54547e-07
	D11	D11_30459117	30459117	G	T	1.70073e-07
	D11	D11_30460579	30460579	T	C	9.88933e-07
	D11	D11_30461040	30461040	G	A	4.93205e-07
	D11	D11_30461171	30461171	A	G	3.71882e-07
	D11	D11_30466531	30466531	T	C	9.78794e-07
	D11	D11_30473584	30473584	A	G	5.9539e-07
	D11	D11_30480699	30480699	T	G	2.10702e-07
	D11	D11_30482346	30482346	A	T	4.71639e-07
	D11	D11_30490921	30490921	A	T	9.69766e-08
	D11	D11_30490932	30490932	T	C	1.46488e-07
	D11	D11_30491172	30491172	G	A	4.93849e-07
	D11	D11_30496802	30496802	A	C	4.12124e-07
	D11	D11_30507414	30507414	C	T	7.71588e-07
	D11	D11_30507731	30507731	A	G	2.98321e-07
	D11	D11_30509097	30509097	C	T	9.64564e-07
	D11	D11_30515852	30515852	T	A	3.05511e-07
	D11	D11_30516535	30516535	A	T	4.64917e-07
	D11	D11_30518907	30518907	A	G	7.33055e-07
	D11	D11_30519009	30519009	A	G	8.55018e-07
	D11	D11_30527207	30527207	T	A	7.6043e-08
	D11	D11_30529413	30529413	A	C	9.37932e-07
	D11	D11_30542628	30542628	A	C	1.93114e-07
	D11	D11_30542912	30542912	C	T	6.53928e-07
	D11	D11_30547869	30547869	T	C	5.67616e-07
	D11	D11_30548190	30548190	T	C	9.24613e-07
	D11	D11_30548903	30548903	A	G	4.48121e-07
	D11	D11_30549162	30549162	A	G	7.12522e-07
	D11	D11_30549165	30549165	A	G	7.12522e-07
	D11	D11_30556053	30556053	T	G	2.71622e-07
	D11	D11_30557385	30557385	A	G	8.59038e-07
	D11	D11_30561582	30561582	G	T	2.04202e-07
	D11	D11_30561944	30561944	A	G	4.85778e-07
	D11	D11_30562010	30562010	T	G	9.50807e-07
	D11	D11_30562308	30562308	T	C	6.05023e-07
	D11	D11_30584765	30584765	C	T	6.72971e-07
	D11	D11_30585923	30585923	G	T	4.80654e-07
	D11	D11_30601803	30601803	A	C	2.55718e-07
	D11	D11_30608132	30608132	G	A	4.03427e-07
	D11	D11_30615777	30615777	C	T	1.68107e-07
	D11	D11_30620701	30620701	C	T	1.72106e-07
	D11	D11_30628225	30628225	A	G	4.80639e-07
	D11	D11_30636008	30636008	C	T	4.33022e-07
	D11	D11_30636156	30636156	A	G	1.71513e-07
	D11	D11_30654523	30654523	G	A	7.41744e-07
	D11	D11_30656470	30656470	C	T	9.58877e-07
	D11	D11_30656512	30656512	A	G	3.55425e-07
	D11	D11_30656587	30656587	A	T	4.06366e-07
	D11	D11_30656598	30656598	C	T	9.47379e-07
	D11	D11_30657074	30657074	T	C	8.68137e-07
	D11	D11_30658285	30658285	C	T	6.42191e-07
	D11	D11_30664681	30664681	C	T	8.22524e-07
	D11	D11_30668424	30668424	A	T	1.2164e-07
	D11	D11_30677255	30677255	A	C	1.92719e-07
	D11	D11_30677341	30677341	G	T	1.01573e-07
	D11	D11_30677686	30677686	A	T	8.40663e-07
	D11	D11_30678409	30678409	A	G	2.29417e-07
	D11	D11_30678486	30678486	G	T	8.41514e-08
	D11	D11_30678948	30678948	T	C	4.31799e-07
	D11	D11_30679110	30679110	C	G	7.99773e-07
	D11	D11_30679176	30679176	T	C	2.32679e-07
	D11	D11_30679663	30679663	A	G	4.03429e-08
	D11	D11_30679689	30679689	T	C	2.10861e-07
	D11	D11_30679896	30679896	G	A	2.30009e-07
	D11	D11_30679939	30679939	A	G	4.87788e-07
	D11	D11_30680776	30680776	G	A	9.40063e-07
	D11	D11_30680861	30680861	A	G	7.96317e-07
	D11	D11_30683635	30683635	C	T	1.64998e-07
	D11	D11_30703371	30703371	T	C	6.02586e-07
	D11	D11_30703534	30703534	A	G	4.19713e-07
	D11	D11_30703541	30703541	T	C	4.19713e-07
	D11	D11_30704050	30704050	T	C	2.73103e-07
	D11	D11_30704522	30704522	A	G	4.80069e-07
	D11	D11_30706505	30706505	T	C	1.87831e-07
	D11	D11_30706639	30706639	T	C	8.61167e-07
	D11	D11_30706751	30706751	C	A	2.24423e-07
	D11	D11_30707099	30707099	G	A	1.93917e-07
	D11	D11_30707152	30707152	C	A	4.90611e-07
	D11	D11_30709471	30709471	C	T	6.83831e-07
	D11	D11_30709888	30709888	G	T	8.21552e-07
	D11	D11_30710111	30710111	C	T	5.48388e-07
	D11	D11_30710502	30710502	T	C	9.51069e-07
	D11	D11_30716172	30716172	C	T	2.19753e-07
	D11	D11_30718109	30718109	T	G	5.04366e-07
	D11	D11_30722892	30722892	C	T	7.05263e-07
	D11	D11_30725523	30725523	T	C	4.01168e-07
	D11	D11_30726216	30726216	T	C	5.97757e-07
	D11	D11_30726247	30726247	C	T	9.53729e-08
	D11	D11_30726261	30726261	T	C	9.68163e-08
	D11	D11_30726758	30726758	T	C	1.85883e-07
	D11	D11_30726848	30726848	T	A	1.47113e-07
	D11	D11_30726852	30726852	A	G	1.47113e-07
	D11	D11_30727540	30727540	G	A	1.83921e-07
	D11	D11_30728040	30728040	A	C	3.79055e-07
	D11	D11_30728510	30728510	G	T	5.99316e-07
	D11	D11_30730179	30730179	T	C	2.81453e-07
	D11	D11_30733950	30733950	C	A	2.43496e-07
	D11	D11_30746083	30746083	T	C	9.7736e-07
	D11	D11_30747715	30747715	A	G	2.5625e-07
	D11	D11_30749691	30749691	A	C	4.16027e-07
	D11	D11_30755235	30755235	A	T	5.98723e-07
	D11	D11_30755456	30755456	A	G	6.06348e-07
	D11	D11_30759219	30759219	G	A	5.73821e-07
	D11	D11_30759223	30759223	C	T	6.27195e-07
	D11	D11_30759585	30759585	A	C	5.65126e-07
	D11	D11_30762287	30762287	G	A	4.44733e-07
	D11	D11_30762596	30762596	A	G	2.24308e-07
	D11	D11_30762674	30762674	C	T	1.9305e-07
	D11	D11_30762893	30762893	C	G	7.56854e-07
	D11	D11_30762919	30762919	T	C	8.49345e-07
	D11	D11_30765608	30765608	T	C	6.5545e-07
	D11	D11_30772035	30772035	T	A	4.6959e-07
	D11	D11_30772216	30772216	C	T	1.65059e-07
	D11	D11_30772522	30772522	A	G	8.69636e-07
	D11	D11_30775849	30775849	C	G	8.54534e-07
	D11	D11_30777140	30777140	A	G	3.48641e-07
	D11	D11_30777673	30777673	C	T	6.86738e-07
FWPB	D02	D02_5880919	5880919	G	A	2.99458e-07
	D02	D02_5880979	5880979	C	G	5.09002e-07
	D02	D02_5887671	5887671	T	C	9.90287e-07
	D02	D02_5888133	5888133	G	C	4.60916e-07
	D02	D02_5888325	5888325	C	T	4.07761e-08
	D02	D02_5888347	5888347	C	T	1.6212e-07
	D02	D02_5888819	5888819	G	A	2.37131e-07
	D02	D02_5888929	5888929	G	T	2.67819e-07
	D02	D02_5888961	5888961	A	C	8.77861e-07
	D11	D11_28246438	28246438	C	T	9.84017e-09
	D11	D11_28758561	28758561	G	A	6.25296e-08
	D11	D11_28761588	28761588	G	A	8.56634e-08
	D11	D11_28761627	28761627	G	A	1.50689e-07
	D11	D11_28816107	28816107	T	C	2.21867e-08
	D11	D11_28816719	28816719	T	C	6.94513e-08
	D11	D11_28816739	28816739	T	C	5.744e-08
	D11	D11_28832701	28832701	T	G	3.0956e-08
	D11	D11_28839754	28839754	T	C	9.16664e-08
	D11	D11_28839811	28839811	T	C	2.98528e-07
	D11	D11_28840237	28840237	T	C	4.03584e-07
	D11	D11_28844491	28844491	T	C	1.33608e-07
	D11	D11_28941078	28941078	C	T	1.21913e-07
	D11	D11_28946596	28946596	A	G	2.41605e-07
	D11	D11_28951269	28951269	C	A	1.37569e-07
	D11	D11_28959679	28959679	T	C	1.15937e-07
	D11	D11_28959807	28959807	T	C	1.12685e-07
	D11	D11_28959813	28959813	G	C	1.12685e-07
	D11	D11_28972918	28972918	G	A	1.17748e-07
	D11	D11_28990696	28990696	G	A	1.35462e-07
	D11	D11_28994660	28994660	A	G	4.05477e-07
	D11	D11_28997488	28997488	C	T	1.67372e-07
	D11	D11_29001931	29001931	G	A	3.35452e-07
	D11	D11_29002071	29002071	C	T	6.95677e-07
	D11	D11_29087086	29087086	G	A	3.95179e-08
	D11	D11_29087394	29087394	A	T	3.72843e-07
	D11	D11_29088102	29088102	C	T	7.13e-08
	D11	D11_29090481	29090481	C	T	4.53606e-08
	D11	D11_29091590	29091590	G	A	1.16832e-07
	D11	D11_29095157	29095157	C	T	5.4095e-08
	D11	D11_29096670	29096670	C	A	1.11021e-07
	D11	D11_29096727	29096727	T	C	1.04677e-07
	D11	D11_29097116	29097116	C	T	9.2905e-08
	D11	D11_29099531	29099531	C	T	1.29176e-07
	D11	D11_29100643	29100643	G	A	3.40875e-07
	D11	D11_29101687	29101687	G	A	1.78003e-07
	D11	D11_29103179	29103179	G	A	1.23339e-07
	D11	D11_29103502	29103502	C	A	8.16823e-08
	D11	D11_29105192	29105192	C	T	4.19006e-08
	D11	D11_29105882	29105882	C	T	6.45779e-08
	D11	D11_29107708	29107708	C	T	1.67843e-07
	D11	D11_29111375	29111375	G	A	9.74012e-08
	D11	D11_29112288	29112288	A	C	8.60295e-08
	D11	D11_29251088	29251088	C	T	2.37706e-08
	D11	D11_38213225	38213225	T	C	5.869e-07
	D11	D11_38392321	38392321	C	T	8.65772e-08
	D11	D11_38402748	38402748	C	T	7.67663e-07
	D11	D11_38405541	38405541	C	T	2.62332e-07
	D11	D11_38416813	38416813	C	A	2.63385e-08
	D11	D11_38521071	38521071	C	T	1.76661e-07
	D11	D11_38521818	38521818	C	T	5.01631e-07
	D11	D11_38537893	38537893	G	A	4.94966e-08
	D11	D11_38574267	38574267	C	A	2.47432e-07
	D11	D11_38660721	38660721	A	G	7.33891e-08
	D11	D11_38677756	38677756	T	C	2.90134e-07
	D11	D11_38889463	38889463	G	A	1.94949e-07
	D11	D11_39028056	39028056	G	T	2.13628e-07
	D11	D11_39042002	39042002	G	A	2.7052e-07
	D11	D11_39082402	39082402	C	T	8.23314e-07
	D11	D11_39123055	39123055	A	T	1.05058e-07
	D11	D11_39238828	39238828	C	T	1.20078e-07
	D11	D11_39272126	39272126	C	T	4.76715e-07
	D11	D11_39580361	39580361	C	T	2.32042e-07
	D11	D11_39844594	39844594	G	A	3.55743e-07
	D11	D11_39945213	39945213	C	T	8.28935e-08
	D11	D11_39989666	39989666	G	T	5.42263e-07
	D11	D11_39998456	39998456	C	T	4.43358e-07
	D11	D11_40299796	40299796	G	A	2.57069e-07
	D11	D11_40308635	40308635	G	A	5.77889e-07
	D11	D11_40325411	40325411	G	A	6.28021e-07
	D11	D11_40362192	40362192	C	T	4.33757e-07
	D11	D11_40440275	40440275	G	A	3.75169e-07
	D11	D11_40685020	40685020	G	A	2.95522e-07
	D11	D11_40793586	40793586	T	C	1.27268e-07
	D11	D11_40827741	40827741	C	T	1.89034e-07
	D11	D11_40970372	40970372	C	T	7.15413e-07
	D11	D11_40980753	40980753	G	A	3.16314e-07
	D11	D11_41281437	41281437	C	T	2.6871e-07
	D11	D11_41397698	41397698	T	A	7.44213e-07
	D11	D11_42328055	42328055	T	C	4.57518e-07
	D11	D11_42350137	42350137	G	A	3.39551e-07
	D11	D11_42412539	42412539	C	A	5.00651e-07
	D11	D11_42438472	42438472	C	T	5.44401e-07
	D11	D11_42444137	42444137	G	A	4.08529e-07
	D11	D11_42446005	42446005	G	A	8.89153e-07
	D11	D11_42516772	42516772	C	T	3.83535e-07
	D11	D11_42681976	42681976	C	T	4.69654e-07
	D11	D11_42839919	42839919	G	A	1.74249e-07
	D11	D11_42887736	42887736	C	T	1.13402e-07
	D11	D11_42910513	42910513	C	T	4.00867e-07
	D11	D11_43002001	43002001	G	A	6.34973e-08
	D11	D11_43025235	43025235	T	C	8.80083e-07
	D11	D11_43026656	43026656	A	G	2.6353e-07
	D11	D11_43051311	43051311	C	T	1.65811e-07
	D11	D11_43123329	43123329	G	A	8.86629e-07
	D11	D11_43223421	43223421	G	A	1.48066e-07
	D11	D11_43241334	43241334	G	A	3.59407e-07
	D11	D11_43438910	43438910	G	A	2.18217e-07
	D11	D11_43475349	43475349	G	A	3.11981e-07
	D11	D11_43850887	43850887	G	A	6.07026e-08
	D11	D11_43986417	43986417	G	A	5.76015e-07
	D11	D11_44088303	44088303	G	A	5.46842e-07
	D11	D11_44142081	44142081	G	A	1.13826e-07
	D11	D11_44173926	44173926	G	A	2.72528e-07
	D11	D11_44578470	44578470	C	T	4.95113e-07
	D11	D11_45551818	45551818	C	A	9.83092e-08
	D11	D11_46134152	46134152	G	T	3.20049e-07
	D11	D11_46147488	46147488	C	A	8.36324e-07
	D11	D11_46387199	46387199	G	A	3.10138e-07
	D11	D11_46516217	46516217	C	T	7.85359e-07
	D11	D11_46714741	46714741	G	A	7.8784e-07
	D11	D11_46900576	46900576	A	G	4.60801e-07
	D11	D11_47025954	47025954	G	A	7.36319e-07
	D11	D11_47039954	47039954	G	A	5.57075e-07
	D11	D11_47311253	47311253	G	A	8.33388e-07
	D11	D11_47410925	47410925	G	T	3.07613e-07
	D11	D11_47656307	47656307	G	A	6.47177e-07
	D11	D11_48036401	48036401	A	G	1.83433e-07
	D11	D11_48037362	48037362	G	A	3.30454e-07
	D11	D11_48310034	48310034	G	A	6.8691e-07
	D11	D11_48470427	48470427	T	A	7.93892e-07
	D11	D11_48576594	48576594	G	A	8.68377e-07
	D11	D11_48600259	48600259	G	A	5.22905e-07
	D11	D11_48615130	48615130	C	G	5.03316e-07
	D11	D11_48653430	48653430	C	T	4.69895e-07
	D11	D11_48664171	48664171	C	A	7.29537e-07
	D11	D11_48664190	48664190	C	T	8.48272e-07
	D11	D11_48668642	48668642	C	T	4.71957e-07
	D11	D11_48763783	48763783	T	A	3.56236e-07
	D11	D11_48830048	48830048	C	T	9.59627e-07
	D11	D11_49387299	49387299	G	A	3.74868e-07
	D11	D11_49444550	49444550	G	A	6.2459e-07
	D11	D11_49517541	49517541	C	T	1.7661e-07
	D11	D11_49811468	49811468	G	A	4.72695e-07
	D11	D11_49924767	49924767	G	A	9.00271e-07
	D11	D11_50071451	50071451	G	A	7.05448e-07
	D11	D11_50265706	50265706	G	A	5.59309e-07
	D11	D11_50472552	50472552	C	T	8.21959e-07

## Sheet: multi-location shared Main-SNPs
Supplementary Table 10. The multi-enviroment shared Main-SNPs using phenotype values of 419 upland cotton for GWAS
Trait	Enviroment	Chromosome	Maker	Position (bp)	allele1	allele0	P-value	Parameters
FL	AY, CZ, DH, JZ, XJ, YC	D11	D11_24511259	24511259	T	G	1.58884e-09	Phenotype values
		D11	D11_24511271	24511271	C	A	1.59776e-08	Phenotype values
		D11	D11_24511278	24511278	C	T	2.06968e-08	Phenotype values
		D11	D11_24512737	24512737	A	G	9.50816e-11	Phenotype values
		D11	D11_24513364	24513364	G	A	3.99774e-10	Phenotype values
		D11	D11_24524036	24524036	C	G	1.66354e-08	Phenotype values
		D11	D11_24527866	24527866	A	G	2.85187e-10	Phenotype values
		D11	D11_24530075	24530075	C	A	1.36369e-10	Phenotype values
		D11	D11_24530082	24530082	C	T	1.36369e-10	Phenotype values
		D11	D11_24530180	24530180	C	G	1.65668e-12	Phenotype values
		D11	D11_24532030	24532030	C	T	1.24065e-09	Phenotype values
		D11	D11_24532719	24532719	T	C	4.4441e-11	Phenotype values
		D11	D11_24532948	24532948	G	C	9.34144e-11	Phenotype values
		D11	D11_24532972	24532972	A	G	1.77025e-10	Phenotype values
		D11	D11_24533087	24533087	T	C	4.05189e-12	Phenotype values
		D11	D11_24533105	24533105	T	C	1.0935e-11	Phenotype values
		D11	D11_24533112	24533112	A	G	1.54932e-12	Phenotype values
		D11	D11_24533182	24533182	C	T	1.24049e-10	Phenotype values
		D11	D11_24533188	24533188	T	C	1.72566e-11	Phenotype values
		D11	D11_24533234	24533234	C	T	2.35889e-10	Phenotype values
		D11	D11_24533546	24533546	A	G	6.13378e-09	Phenotype values
		D11	D11_24533707	24533707	T	C	3.48567e-09	Phenotype values
		D11	D11_24533879	24533879	T	C	9.84628e-10	Phenotype values
		D11	D11_24534070	24534070	T	C	3.43723e-09	Phenotype values
		D11	D11_24534879	24534879	C	T	1.47355e-11	Phenotype values
		D11	D11_24534962	24534962	T	C	9.19529e-10	Phenotype values
		D11	D11_24535073	24535073	A	G	2.69372e-10	Phenotype values
		D11	D11_24535124	24535124	G	A	5.19526e-11	Phenotype values
		D11	D11_24535267	24535267	T	C	3.17977e-11	Phenotype values
		D11	D11_24535354	24535354	T	C	1.04208e-09	Phenotype values
		D11	D11_24535425	24535425	C	T	1.45264e-11	Phenotype values
		D11	D11_24535531	24535531	A	G	2.54729e-10	Phenotype values
		D11	D11_24535713	24535713	A	G	2.63493e-10	Phenotype values
		D11	D11_24535859	24535859	G	A	8.06186e-09	Phenotype values
		D11	D11_24540688	24540688	A	G	2.26153e-09	Phenotype values
		D11	D11_24541063	24541063	A	C	9.41567e-09	Phenotype values
		D11	D11_24541065	24541065	T	G	1.16456e-08	Phenotype values
		D11	D11_24542306	24542306	C	T	4.81152e-10	Phenotype values
		D11	D11_24542317	24542317	A	G	6.93224e-10	Phenotype values
		D11	D11_24542353	24542353	G	A	1.93538e-10	Phenotype values
		D11	D11_24542387	24542387	A	C	1.04257e-09	Phenotype values
		D11	D11_24543121	24543121	G	A	7.79427e-11	Phenotype values
		D11	D11_24543232	24543232	A	G	1.4309e-11	Phenotype values
		D11	D11_24546205	24546205	G	T	2.65504e-10	Phenotype values
		D11	D11_24547744	24547744	T	A	1.23879e-09	Phenotype values
		D11	D11_24550791	24550791	C	T	7.76273e-11	Phenotype values
		D11	D11_24552738	24552738	G	A	2.04454e-10	Phenotype values
		D11	D11_24555912	24555912	A	G	1.18222e-09	Phenotype values
		D11	D11_24556356	24556356	T	G	5.5369e-11	Phenotype values
		D11	D11_24556619	24556619	A	G	1.20792e-09	Phenotype values
		D11	D11_24557755	24557755	C	T	5.55052e-11	Phenotype values
		D11	D11_24557805	24557805	T	C	4.08532e-10	Phenotype values
		D11	D11_24558301	24558301	C	T	4.95721e-09	Phenotype values
		D11	D11_24558478	24558478	A	G	4.50183e-09	Phenotype values
		D11	D11_24558494	24558494	A	G	3.71376e-10	Phenotype values
		D11	D11_24558570	24558570	G	A	2.39116e-09	Phenotype values
		D11	D11_24559285	24559285	T	C	1.4982e-09	Phenotype values
		D11	D11_24559329	24559329	T	C	5.05187e-09	Phenotype values
		D11	D11_24559844	24559844	A	C	1.22329e-12	Phenotype values
		D11	D11_24559849	24559849	C	A	3.12653e-13	Phenotype values
		D11	D11_24559877	24559877	C	T	1.29016e-11	Phenotype values
		D11	D11_24559891	24559891	G	T	3.13683e-11	Phenotype values
		D11	D11_24559905	24559905	T	C	1.238e-11	Phenotype values
		D11	D11_24560277	24560277	T	C	4.1786e-10	Phenotype values
		D11	D11_24561127	24561127	C	T	3.07586e-10	Phenotype values
		D11	D11_24576649	24576649	A	G	7.33677e-11	Phenotype values
		D11	D11_24576734	24576734	A	G	3.99238e-10	Phenotype values
		D11	D11_24582808	24582808	G	C	4.2215e-09	Phenotype values
		D11	D11_24583721	24583721	T	C	4.2451e-09	Phenotype values
		D11	D11_24583793	24583793	A	G	6.3956e-10	Phenotype values
		D11	D11_24583805	24583805	A	G	8.23531e-10	Phenotype values
		D11	D11_24584569	24584569	T	C	9.56088e-10	Phenotype values
		D11	D11_24584656	24584656	C	A	1.06957e-12	Phenotype values
		D11	D11_24584683	24584683	T	C	4.638e-13	Phenotype values
		D11	D11_24584713	24584713	T	C	5.30021e-13	Phenotype values
		D11	D11_24584720	24584720	C	A	2.30497e-12	Phenotype values
		D11	D11_24585282	24585282	A	G	1.11166e-08	Phenotype values
		D11	D11_24585298	24585298	T	C	1.36335e-08	Phenotype values
		D11	D11_24585657	24585657	C	T	1.79222e-10	Phenotype values
		D11	D11_24585860	24585860	C	T	1.13223e-09	Phenotype values
		D11	D11_24586536	24586536	A	C	7.24631e-11	Phenotype values
		D11	D11_24586619	24586619	G	A	1.77262e-10	Phenotype values
		D11	D11_24586961	24586961	T	C	1.61576e-08	Phenotype values
		D11	D11_24587385	24587385	C	T	1.56655e-11	Phenotype values
		D11	D11_24587389	24587389	C	T	1.56655e-11	Phenotype values
		D11	D11_24587415	24587415	A	G	4.61645e-11	Phenotype values
		D11	D11_24587600	24587600	A	G	1.00705e-09	Phenotype values
		D11	D11_24587637	24587637	C	T	4.67579e-09	Phenotype values
		D11	D11_24587808	24587808	A	G	2.39222e-10	Phenotype values
		D11	D11_24587857	24587857	T	A	7.5926e-10	Phenotype values
		D11	D11_24587872	24587872	C	T	2.5151e-09	Phenotype values
		D11	D11_24587884	24587884	T	C	5.11136e-10	Phenotype values
		D11	D11_24587965	24587965	T	C	5.38641e-09	Phenotype values
		D11	D11_24588012	24588012	A	G	1.21999e-08	Phenotype values
		D11	D11_24588188	24588188	A	G	7.95814e-10	Phenotype values
		D11	D11_24588223	24588223	A	G	1.64965e-09	Phenotype values
		D11	D11_24588469	24588469	C	T	1.48829e-10	Phenotype values
		D11	D11_24588573	24588573	A	G	1.89206e-09	Phenotype values
		D11	D11_24589211	24589211	T	C	3.08882e-12	Phenotype values
		D11	D11_24589266	24589266	A	C	5.18756e-10	Phenotype values
		D11	D11_24590168	24590168	A	C	8.93184e-09	Phenotype values
		D11	D11_24591253	24591253	A	G	2.04441e-10	Phenotype values
		D11	D11_24591290	24591290	T	C	1.12372e-09	Phenotype values
		D11	D11_24591427	24591427	A	G	3.42337e-10	Phenotype values
		D11	D11_24591481	24591481	G	A	7.81727e-11	Phenotype values
		D11	D11_24591997	24591997	G	A	5.86361e-10	Phenotype values
		D11	D11_24592019	24592019	T	C	1.34944e-10	Phenotype values
		D11	D11_24592127	24592127	C	T	2.48561e-10	Phenotype values
		D11	D11_24592412	24592412	G	A	1.7464e-10	Phenotype values
		D11	D11_24598636	24598636	T	A	4.40493e-10	Phenotype values
		D11	D11_24614085	24614085	T	C	2.21697e-11	Phenotype values
		D11	D11_24614130	24614130	A	G	2.96708e-10	Phenotype values
		D11	D11_24614213	24614213	T	C	5.6249e-09	Phenotype values
		D11	D11_24615998	24615998	A	G	1.06981e-10	Phenotype values
		D11	D11_24616033	24616033	A	G	5.66352e-10	Phenotype values
		D11	D11_24616184	24616184	A	G	2.51745e-10	Phenotype values
		D11	D11_24616726	24616726	T	C	5.80012e-10	Phenotype values
		D11	D11_24623772	24623772	A	G	7.32478e-10	Phenotype values
		D11	D11_24627860	24627860	G	A	2.52426e-11	Phenotype values
		D11	D11_24630425	24630425	T	C	1.47886e-11	Phenotype values
		D11	D11_24635613	24635613	G	A	6.15178e-10	Phenotype values
		D11	D11_24635619	24635619	G	A	6.34757e-10	Phenotype values
		D11	D11_24635891	24635891	G	A	1.21309e-08	Phenotype values
		D11	D11_24636013	24636013	A	T	1.28782e-09	Phenotype values
		D11	D11_24637361	24637361	A	G	1.35575e-10	Phenotype values
		D11	D11_24637581	24637581	T	G	1.7232e-11	Phenotype values
		D11	D11_24637948	24637948	A	G	3.63638e-11	Phenotype values
		D11	D11_24638169	24638169	T	C	2.7585e-10	Phenotype values
		D11	D11_24638715	24638715	T	C	2.68111e-12	Phenotype values
		D11	D11_24638824	24638824	A	G	2.91181e-12	Phenotype values
		D11	D11_24640201	24640201	C	G	1.74151e-09	Phenotype values
		D11	D11_24640935	24640935	T	C	1.49916e-10	Phenotype values
		D11	D11_24641238	24641238	A	G	4.98954e-12	Phenotype values
		D11	D11_24641240	24641240	A	G	4.98954e-12	Phenotype values
		D11	D11_24641340	24641340	C	A	4.49034e-10	Phenotype values
		D11	D11_24641555	24641555	C	G	1.27929e-10	Phenotype values
		D11	D11_24641701	24641701	C	T	2.81144e-11	Phenotype values
		D11	D11_24641741	24641741	T	C	7.88967e-10	Phenotype values
		D11	D11_24641802	24641802	A	T	2.83646e-09	Phenotype values
		D11	D11_24657149	24657149	A	C	3.54645e-09	Phenotype values
		D11	D11_24657274	24657274	G	A	1.8203e-09	Phenotype values
		D11	D11_24658402	24658402	A	G	2.09625e-09	Phenotype values
		D11	D11_24658763	24658763	T	G	1.69509e-09	Phenotype values
		D11	D11_24659631	24659631	A	G	1.50937e-10	Phenotype values
		D11	D11_24660645	24660645	A	C	6.53464e-10	Phenotype values
		D11	D11_24660658	24660658	G	A	2.00553e-09	Phenotype values
		D11	D11_24661838	24661838	A	G	6.2146e-10	Phenotype values
		D11	D11_24662764	24662764	A	G	1.91515e-09	Phenotype values
		D11	D11_24669535	24669535	G	A	3.3362e-10	Phenotype values
		D11	D11_24671053	24671053	T	C	3.90336e-10	Phenotype values
		D11	D11_24671076	24671076	C	T	3.3196e-10	Phenotype values
		D11	D11_24672035	24672035	A	G	1.16714e-11	Phenotype values
		D11	D11_24672059	24672059	C	T	1.02743e-10	Phenotype values
		D11	D11_24676672	24676672	A	G	1.13562e-09	Phenotype values
		D11	D11_24676916	24676916	A	G	6.405e-10	Phenotype values
		D11	D11_24677787	24677787	A	G	7.10076e-11	Phenotype values
		D11	D11_24678174	24678174	C	A	2.30542e-11	Phenotype values
		D11	D11_24678919	24678919	A	G	1.7089e-09	Phenotype values
		D11	D11_24682076	24682076	C	T	6.42769e-11	Phenotype values
		D11	D11_24685948	24685948	T	C	2.50441e-09	Phenotype values
		D11	D11_24686383	24686383	T	C	9.93885e-10	Phenotype values
		D11	D11_24687450	24687450	T	C	1.70082e-09	Phenotype values
		D11	D11_24687621	24687621	A	G	5.19084e-09	Phenotype values
		D11	D11_24687702	24687702	A	T	6.30739e-11	Phenotype values
		D11	D11_24687842	24687842	C	A	3.75005e-10	Phenotype values
		D11	D11_24687874	24687874	G	T	1.18668e-09	Phenotype values
		D11	D11_24687885	24687885	G	C	5.37009e-10	Phenotype values
		D11	D11_24687989	24687989	T	G	3.05413e-11	Phenotype values
		D11	D11_24688313	24688313	A	G	3.11042e-10	Phenotype values
		D11	D11_24688369	24688369	T	G	1.17465e-10	Phenotype values
		D11	D11_24689219	24689219	T	G	2.55787e-09	Phenotype values
		D11	D11_24689937	24689937	G	A	1.35453e-08	Phenotype values
		D11	D11_24690226	24690226	C	A	6.42763e-10	Phenotype values
		D11	D11_24690395	24690395	C	T	1.10225e-10	Phenotype values
		D11	D11_24695490	24695490	T	G	3.17889e-10	Phenotype values
		D11	D11_24695552	24695552	A	C	1.58168e-08	Phenotype values
		D11	D11_24696984	24696984	G	C	1.41984e-09	Phenotype values
		D11	D11_24696996	24696996	G	T	1.73833e-10	Phenotype values
		D11	D11_24697052	24697052	A	G	1.86712e-09	Phenotype values
		D11	D11_24698114	24698114	T	C	6.2058e-10	Phenotype values
		D11	D11_24705503	24705503	C	A	6.93223e-10	Phenotype values
		D11	D11_24705751	24705751	G	A	2.64171e-08	Phenotype values
		D11	D11_24705773	24705773	C	T	1.58189e-08	Phenotype values
		D11	D11_24705782	24705782	C	A	1.88694e-08	Phenotype values
		D11	D11_24712589	24712589	A	G	2.28817e-09	Phenotype values
		D11	D11_24713703	24713703	C	T	2.27299e-09	Phenotype values
		D11	D11_24714915	24714915	A	G	1.15334e-08	Phenotype values
		D11	D11_24714988	24714988	G	A	7.15283e-09	Phenotype values
		D11	D11_24715033	24715033	C	G	1.32405e-08	Phenotype values
		D11	D11_24715072	24715072	A	G	6.02011e-09	Phenotype values
		D11	D11_24716498	24716498	A	G	6.60692e-11	Phenotype values
		D11	D11_24718144	24718144	G	A	2.65383e-09	Phenotype values
FS	CZ,XJ,DH	A07	A07_90329540	90329540	A	G	8.34349e-09	Phenotype values
		A07	A07_90453460	90453460	C	A	1.1084e-09	Environmental adaptation parameters, Phenotype values
		A07	A07_90453726	90453726	A	C	7.39717e-09	Environmental adaptation parameters, Phenotype values
		A07	A07_90453789	90453789	C	G	3.21979e-09	Environmental adaptation parameters, Phenotype values
		A07	A07_90457284	90457284	T	C	3.12557e-09	Environmental adaptation parameters, Phenotype values
		A07	A07_90457326	90457326	A	C	3.23754e-09	Environmental adaptation parameters, Phenotype values
		A07	A07_90458162	90458162	T	G	2.10737e-09	Environmental adaptation parameters, Phenotype values
		A07	A07_90460145	90460145	T	A	2.32373e-10	Environmental adaptation parameters, Phenotype values
		A07	A07_90461904	90461904	T	C	6.70705e-09	Environmental adaptation parameters, Phenotype values
		A07	A07_90462646	90462646	A	G	9.03458e-09	Phenotype values
		A07	A07_90463285	90463285	A	C	2.79107e-09	Environmental adaptation parameters, Phenotype values
		A07	A07_90463515	90463515	A	C	3.3735e-09	Environmental adaptation parameters, Phenotype values
		A07	A07_90463548	90463548	T	C	2.44297e-09	Environmental adaptation parameters, Phenotype values
		A07	A07_90463686	90463686	G	A	6.83981e-09	Phenotype values
		A07	A07_90464210	90464210	A	T	6.67566e-08	Phenotype values
		A07	A07_90464295	90464295	A	C	5.94329e-09	Environmental adaptation parameters, Phenotype values
		A07	A07_90464519	90464519	T	C	7.11894e-11	Environmental adaptation parameters, Phenotype values
		A07	A07_90464553	90464553	G	A	2.03488e-10	Environmental adaptation parameters, Phenotype values
		A07	A07_90468284	90468284	T	G	5.64985e-10	Environmental adaptation parameters, Phenotype values
		A07	A07_90469148	90469148	A	T	2.9478e-08	Environmental adaptation parameters, Phenotype values
		A07	A07_90470827	90470827	A	G	7.50563e-10	Environmental adaptation parameters, Phenotype values
		A07	A07_90470916	90470916	G	C	1.71708e-07	Phenotype values
		A07	A07_90471608	90471608	A	G	1.0656e-09	Environmental adaptation parameters, Phenotype values
		A07	A07_90475963	90475963	T	C	1.35832e-08	Phenotype values
		A07	A07_90476238	90476238	A	G	7.43685e-09	Phenotype values
		A07	A07_90479967	90479967	G	A	9.73106e-10	Environmental adaptation parameters, Phenotype values
		A07	A07_90488968	90488968	T	A	2.52748e-09	Environmental adaptation parameters, Phenotype values
		A07	A07_90490830	90490830	C	T	4.91426e-09	Environmental adaptation parameters, Phenotype values
		A07	A07_90493480	90493480	T	C	4.14439e-09	Environmental adaptation parameters, Phenotype values
		A07	A07_90494072	90494072	A	G	1.98674e-09	Environmental adaptation parameters, Phenotype values
		A07	A07_90495787	90495787	A	G	4.61995e-09	Environmental adaptation parameters, Phenotype values
		A07	A07_90495798	90495798	T	C	2.39759e-09	Environmental adaptation parameters, Phenotype values
		A07	A07_90497237	90497237	G	A	3.713e-09	Environmental adaptation parameters, Phenotype values
		A07	A07_90497375	90497375	T	A	1.7603e-09	Environmental adaptation parameters, Phenotype values
		A07	A07_90497492	90497492	A	C	4.02344e-09	Environmental adaptation parameters, Phenotype values
		A07	A07_90498854	90498854	A	G	3.08436e-11	Environmental adaptation parameters, Phenotype values
		A07	A07_90498927	90498927	T	C	6.8868e-10	Environmental adaptation parameters, Phenotype values
		A07	A07_90503224	90503224	A	G	1.1647e-09	Environmental adaptation parameters, Phenotype values
		A07	A07_90503285	90503285	A	G	6.59375e-10	Environmental adaptation parameters, Phenotype values
		A07	A07_90503351	90503351	A	G	1.70515e-10	Environmental adaptation parameters, Phenotype values
		A07	A07_90512426	90512426	T	C	8.58463e-08	Phenotype values
		A07	A07_90512448	90512448	A	T	2.80478e-08	Environmental adaptation parameters, Phenotype values
		A07	A07_90515557	90515557	C	G	4.49301e-09	Environmental adaptation parameters, Phenotype values
		A07	A07_90515678	90515678	T	C	8.72678e-09	Environmental adaptation parameters, Phenotype values
		A07	A07_90515809	90515809	C	T	3.10936e-09	Environmental adaptation parameters, Phenotype values
		A07	A07_90516008	90516008	C	T	2.73288e-08	Phenotype values
		A07	A07_90519682	90519682	A	C	1.1418e-08	Environmental adaptation parameters, Phenotype values
		A07	A07_90523020	90523020	A	G	2.56701e-09	Phenotype values
		A07	A07_90523037	90523037	T	G	3.21903e-09	Environmental adaptation parameters, Phenotype values
		A07	A07_90523364	90523364	A	G	1.67138e-10	Environmental adaptation parameters, Phenotype values
		A07	A07_90523938	90523938	C	T	6.66164e-10	Environmental adaptation parameters, Phenotype values
		A07	A07_90541569	90541569	C	G	2.52122e-08	Phenotype values
		A07	A07_90542095	90542095	T	G	1.59099e-10	Phenotype values
		A07	A07_90543362	90543362	G	T	1.34647e-09	Environmental adaptation parameters, Phenotype values
		A07	A07_90547005	90547005	C	T	3.09978e-09	Environmental adaptation parameters, Phenotype values
		A07	A07_90547064	90547064	T	A	2.68675e-09	Phenotype values
		A07	A07_90559451	90559451	T	C	6.37107e-10	Environmental adaptation parameters, Phenotype values
		A07	A07_90560362	90560362	C	G	6.3571e-08	Phenotype values
		A07	A07_90560374	90560374	G	A	7.4163e-08	Phenotype values
		A07	A07_90561090	90561090	T	C	6.47005e-09	Environmental adaptation parameters, Phenotype values
		A07	A07_90561139	90561139	T	C	1.64589e-08	Phenotype values
		A07	A07_90561293	90561293	C	T	2.03491e-08	Phenotype values
		A07	A07_90562378	90562378	A	G	2.36439e-10	Environmental adaptation parameters, Phenotype values
		A07	A07_90562454	90562454	A	T	5.692e-09	Phenotype values
		A07	A07_90562670	90562670	G	A	1.23796e-08	Environmental adaptation parameters, Phenotype values
		A07	A07_90562976	90562976	A	C	1.84698e-09	Environmental adaptation parameters, Phenotype values
		A07	A07_90563073	90563073	T	C	3.61102e-09	Environmental adaptation parameters, Phenotype values
		A07	A07_90563205	90563205	T	G	1.71116e-09	Environmental adaptation parameters, Phenotype values
		A07	A07_90565279	90565279	C	T	1.73238e-07	Phenotype values
		A07	A07_90569355	90569355	T	A	1.72631e-09	Environmental adaptation parameters, Phenotype values
		A07	A07_90570275	90570275	T	C	8.94485e-09	Phenotype values
		A07	A07_90570468	90570468	A	G	3.33899e-09	Environmental adaptation parameters, Phenotype values
		A07	A07_90574876	90574876	G	A	2.00297e-09	Environmental adaptation parameters, Phenotype values
		A07	A07_90574877	90574877	A	T	2.00297e-09	Environmental adaptation parameters, Phenotype values
		A07	A07_90579218	90579218	A	G	1.68938e-09	Environmental adaptation parameters, Phenotype values
		A07	A07_90579245	90579245	G	A	3.24645e-09	Environmental adaptation parameters, Phenotype values
		A07	A07_90579597	90579597	A	C	1.8659e-11	Environmental adaptation parameters, Phenotype values
		A07	A07_90579912	90579912	A	G	6.64844e-09	Phenotype values
		A07	A07_90580154	90580154	G	A	4.45568e-09	Environmental adaptation parameters, Phenotype values
		A07	A07_90580337	90580337	A	G	1.26444e-09	Environmental adaptation parameters, Phenotype values
		A07	A07_90580984	90580984	A	G	4.20597e-09	Phenotype values
		A07	A07_90581005	90581005	G	A	5.95419e-09	Phenotype values
		A07	A07_90585711	90585711	C	T	3.96947e-08	Phenotype values
		A07	A07_90586336	90586336	G	A	1.17025e-09	Environmental adaptation parameters, Phenotype values
		A07	A07_90586569	90586569	G	A	2.74179e-09	Environmental adaptation parameters, Phenotype values
		A07	A07_90587136	90587136	G	A	5.21715e-09	Environmental adaptation parameters, Phenotype values
		A07	A07_90587279	90587279	T	C	1.72822e-09	Environmental adaptation parameters, Phenotype values
		A07	A07_90587347	90587347	C	T	1.06388e-09	Environmental adaptation parameters, Phenotype values
		A07	A07_90587672	90587672	A	G	4.2684e-10	Environmental adaptation parameters, Phenotype values
		A07	A07_90587710	90587710	T	C	4.69395e-10	Environmental adaptation parameters, Phenotype values
		A07	A07_90587719	90587719	T	G	4.69395e-10	Environmental adaptation parameters, Phenotype values
		A07	A07_90587857	90587857	T	G	2.30504e-10	Environmental adaptation parameters, Phenotype values
		A07	A07_90587986	90587986	A	G	2.82202e-09	Environmental adaptation parameters, Phenotype values
		A07	A07_90588030	90588030	G	A	3.21075e-09	Environmental adaptation parameters, Phenotype values
		A07	A07_90588123	90588123	G	T	5.79934e-09	Environmental adaptation parameters, Phenotype values
		A07	A07_90588208	90588208	A	G	8.62459e-09	Environmental adaptation parameters, Phenotype values
		A07	A07_90588245	90588245	G	A	2.89101e-09	Environmental adaptation parameters, Phenotype values
		A07	A07_90588685	90588685	T	C	7.99243e-09	Phenotype values
